# Supplementary material for: Isobaric Tags for Relative and Absolute Quantitation (iTRAQ)-Based Comparative Proteome Analysis of the Response of Ramie under Drought Stress
Source: Int J Mol Sci. 2016 Sep 27;17(10):1607. doi: 10.3390/ijms17101607 (PMC5085640; doi:10.3390/ijms17101607)
Supplement: Supplementary file 1 [file ijms-17-01607-s001.zip]

Archive with 9 entries (8 files):
- ijms-134229-Supplementary Materials/
- ijms-134229-Supplementary Materials/ijms-134229-supplementary.pdf
- ijms-134229-Supplementary Materials/Table S1.xls
- ijms-134229-Supplementary Materials/Table S2.xlsx
- ijms-134229-Supplementary Materials/Table S3.xlsx
- ijms-134229-Supplementary Materials/Table S4.xlsx
- ijms-134229-Supplementary Materials/Table S5.xlsx
- ijms-134229-Supplementary Materials/Table S6.xlsx
- ijms-134229-Supplementary Materials/Table S7.xlsx
