# Supplementary material for: Isobaric Tags for Relative and Absolute Quantitation (iTRAQ)-Based Comparative Proteome Analysis of the Response of Ramie under Drought Stress
Source: Int J Mol Sci. 2016 Sep 27;17(10):1607. doi: 10.3390/ijms17101607 (PMC5085640; doi:10.3390/ijms17101607)
Supplement: Supplementary file 1 [file ijms-17-01607-s001.zip › ijms-134229-Supplementary Materials/Table S1.xls]

Protein	Description	biological_process	cellular_component	molecular_function
gi|257310596	|257310596	cellular_process metabolic_process multi-organism_process response_to_stimulus single-organism_process	cell cell_part membrane membrane-enclosed_lumen organelle organelle_part	binding catalytic_activity
gi|24210539	|24210539	cellular_process metabolic_process	cell cell_part organelle	binding catalytic_activity
gi|255638223	|255638223		cell cell_part extracellular_region membrane organelle organelle_part
gi|21633435	|21633435	cellular_process establishment_of_localization localization metabolic_process single-organism_process	cell cell_part macromolecular_complex membrane membrane_part organelle organelle_part	binding catalytic_activity transporter_activity
gi|1351138	|1351138	cellular_process metabolic_process		catalytic_activity
gi|222850363	|222850363	cellular_process metabolic_process multi-organism_process response_to_stimulus single-organism_process	cell cell_part membrane membrane-enclosed_lumen organelle organelle_part	binding catalytic_activity
gi|297744178	|297744178	cellular_component_organization_or_biogenesis cellular_process metabolic_process response_to_stimulus	cell cell_part organelle	binding catalytic_activity
gi|17224774	|17224774	cellular_process establishment_of_localization localization metabolic_process single-organism_process	cell cell_part macromolecular_complex membrane membrane_part organelle organelle_part	binding catalytic_activity transporter_activity
gi|302142655	|302142655	cellular_process metabolic_process	cell cell_part organelle	binding catalytic_activity
gi|297737663	|297737663	biological_regulation cellular_process developmental_process metabolic_process multicellular_organismal_process response_to_stimulus single-organism_process	cell cell_part extracellular_region membrane organelle organelle_part	binding catalytic_activity
gi|194466127	|194466127	cellular_process metabolic_process	cell cell_part membrane	binding catalytic_activity
gi|190358179	|190358179	cellular_process establishment_of_localization localization metabolic_process single-organism_process	cell cell_part macromolecular_complex membrane membrane_part organelle organelle_part	binding catalytic_activity transporter_activity
gi|118489203	|118489203	biological_regulation cellular_process immune_system_process metabolic_process multi-organism_process regulation_of_biological_process response_to_stimulus single-organism_process	cell cell_part extracellular_region macromolecular_complex membrane membrane_part membrane-enclosed_lumen organelle organelle_part	binding catalytic_activity electron_carrier_activity
gi|2098707	|2098707	biological_regulation cellular_component_organization_or_biogenesis cellular_process metabolic_process regulation_of_biological_process single-organism_process	cell cell_part extracellular_region	catalytic_activity enzyme_regulator_activity
gi|296081151	|296081151	cellular_component_organization_or_biogenesis cellular_process metabolic_process single-organism_process	cell cell_part membrane	binding
gi|196166898	|196166898	biological_regulation cellular_component_organization_or_biogenesis cellular_process metabolic_process regulation_of_biological_process response_to_stimulus signaling single-organism_process	cell cell_part organelle	binding catalytic_activity
gi|82941449	|82941449	cellular_process metabolic_process response_to_stimulus	cell cell_part extracellular_region membrane membrane-enclosed_lumen organelle organelle_part	binding catalytic_activity
gi|15723719	|15723719	cellular_process establishment_of_localization localization metabolic_process single-organism_process	cell cell_part macromolecular_complex membrane membrane_part organelle organelle_part	binding catalytic_activity transporter_activity
gi|194698876	|194698876	cellular_component_organization_or_biogenesis cellular_process metabolic_process single-organism_process	cell cell_part macromolecular_complex organelle organelle_part	binding catalytic_activity structural_molecule_activity
gi|222853009	|222853009	cellular_process metabolic_process response_to_stimulus	cell cell_junction cell_part extracellular_region membrane membrane-enclosed_lumen organelle organelle_part symplast	binding catalytic_activity
gi|295311634	|295311634	cellular_process establishment_of_localization localization metabolic_process single-organism_process	cell cell_part macromolecular_complex membrane membrane_part organelle organelle_part	transporter_activity
gi|255641684	|255641684	cellular_component_organization_or_biogenesis cellular_process metabolic_process response_to_stimulus single-organism_process	cell cell_part macromolecular_complex membrane organelle organelle_part	binding catalytic_activity structural_molecule_activity
gi|255637109	|255637109	cellular_process metabolic_process single-organism_process		binding catalytic_activity
gi|226530645	|226530645	cellular_process metabolic_process response_to_stimulus	cell cell_part extracellular_region organelle organelle_part	binding catalytic_activity
gi|255671803	|255671803	cellular_process developmental_process metabolic_process multicellular_organismal_process single-organism_process	cell cell_part organelle organelle_part	binding catalytic_activity
gi|306416861	|306416861	metabolic_process response_to_stimulus	cell cell_part membrane	binding catalytic_activity
gi|2623246	|2623246	biological_regulation cellular_component_organization_or_biogenesis cellular_process developmental_process establishment_of_localization immune_system_process localization metabolic_process multi-organism_process multicellular_organismal_process negative_regulation_of_biological_process positive_regulation_of_biological_process regulation_of_biological_process response_to_stimulus signaling singl…	cell cell_part membrane organelle organelle_part	catalytic_activity
gi|217071056	|217071056	cellular_process metabolic_process	cell cell_part macromolecular_complex membrane membrane-enclosed_lumen organelle organelle_part	catalytic_activity structural_molecule_activity
gi|255570589	|255570589	biological_regulation cellular_component_organization_or_biogenesis cellular_process establishment_of_localization localization metabolic_process single-organism_process	cell cell_part extracellular_region membrane organelle organelle_part	binding
gi|222841311	|222841311	biological_regulation cellular_process metabolic_process regulation_of_biological_process response_to_stimulus signaling single-organism_process	cell cell_junction cell_part extracellular_region membrane organelle symplast	catalytic_activity
gi|223946033	|223946033	biological_regulation cellular_component_organization_or_biogenesis cellular_process developmental_process metabolic_process multi-organism_process positive_regulation_of_biological_process regulation_of_biological_process response_to_stimulus single-organism_process	cell cell_part organelle	binding
gi|257632957	|257632957	metabolic_process		binding catalytic_activity
gi|296784038	|296784038	cellular_process metabolic_process response_to_stimulus	cell cell_part extracellular_region macromolecular_complex membrane membrane_part organelle organelle_part	binding catalytic_activity
gi|307683431	|307683431	cellular_process metabolic_process response_to_stimulus	cell cell_part macromolecular_complex membrane membrane_part organelle organelle_part	binding catalytic_activity electron_carrier_activity
gi|113363	|113363	metabolic_process response_to_stimulus	cell cell_part membrane	binding catalytic_activity
gi|302143374	|302143374	cellular_process metabolic_process	cell cell_part organelle	binding catalytic_activity
gi|226531187	|226531187	cellular_process metabolic_process	cell cell_part organelle	catalytic_activity
gi|18203445	|18203445	cellular_process developmental_process metabolic_process response_to_stimulus single-organism_process	cell cell_part macromolecular_complex membrane membrane-enclosed_lumen organelle organelle_part	structural_molecule_activity
gi|118481158	|118481158	cellular_process metabolic_process	cell cell_part extracellular_region membrane organelle	catalytic_activity
gi|115448201	|115448201	cellular_process metabolic_process response_to_stimulus single-organism_process	cell cell_part organelle organelle_part	binding catalytic_activity
gi|126363763	|126363763	cellular_process metabolic_process	cell cell_part organelle	catalytic_activity
gi|224286557	|224286557			catalytic_activity
gi|298552499	|298552499	metabolic_process response_to_stimulus	cell cell_part organelle	binding catalytic_activity
gi|222855491	|222855491	metabolic_process	extracellular_region	binding catalytic_activity
gi|306481563	|306481563	cellular_process metabolic_process	cell cell_part organelle	binding catalytic_activity
gi|297608223	|297608223	cellular_component_organization_or_biogenesis cellular_process metabolic_process multi-organism_process response_to_stimulus single-organism_process	cell cell_part organelle	catalytic_activity
gi|296083203	|296083203	cellular_component_organization_or_biogenesis cellular_process establishment_of_localization localization metabolic_process single-organism_process	cell cell_part macromolecular_complex membrane organelle organelle_part	binding structural_molecule_activity
gi|225432620	|225432620	cellular_process metabolic_process	cell cell_part macromolecular_complex membrane membrane_part organelle organelle_part
gi|126363757	|126363757	cellular_process metabolic_process	cell cell_part organelle	catalytic_activity
gi|87240711	|87240711	biological_regulation cellular_component_organization_or_biogenesis cellular_process developmental_process establishment_of_localization growth localization metabolic_process multicellular_organismal_process regulation_of_biological_process response_to_stimulus single-organism_process	cell cell_part macromolecular_complex membrane membrane_part organelle organelle_part	catalytic_activity transporter_activity
gi|227206436	|227206436	biological_regulation cellular_process establishment_of_localization localization metabolic_process regulation_of_biological_process response_to_stimulus signaling single-organism_process	cell cell_junction cell_part organelle symplast	binding enzyme_regulator_activity transporter_activity
gi|259585724	|259585724	cellular_component_organization_or_biogenesis cellular_process metabolic_process single-organism_process	cell cell_part extracellular_region organelle	catalytic_activity
gi|147838018	|147838018	cellular_process establishment_of_localization localization single-organism_process	cell cell_part membrane-enclosed_lumen organelle organelle_part	transporter_activity
gi|401414	|401414	cellular_component_organization_or_biogenesis cellular_process establishment_of_localization immune_system_process localization metabolic_process multi-organism_process response_to_stimulus single-organism_process	extracellular_region	binding catalytic_activity
gi|15144318	|15144318	developmental_process metabolic_process multicellular_organismal_process single-organism_process	cell cell_part membrane organelle	catalytic_activity
gi|12005294	|12005294	cellular_process metabolic_process	cell cell_part macromolecular_complex membrane membrane_part organelle organelle_part	binding electron_carrier_activity
gi|211906528	|211906528	cellular_process metabolic_process multi-organism_process response_to_stimulus	cell cell_part organelle organelle_part	binding catalytic_activity
gi|121309841	|121309841	cellular_process metabolic_process response_to_stimulus	cell cell_part extracellular_region membrane organelle organelle_part	binding catalytic_activity
gi|148907829	|148907829	cellular_process developmental_process establishment_of_localization localization metabolic_process multicellular_organismal_process reproduction reproductive_process single-organism_process	cell cell_part organelle organelle_part	binding catalytic_activity
gi|222859367	|222859367		membrane	catalytic_activity
gi|255568744	|255568744	metabolic_process response_to_stimulus	cell cell_part organelle	binding catalytic_activity
gi|62320984	|62320984	cellular_process developmental_process metabolic_process multicellular_organismal_process single-organism_process	cell cell_part organelle	catalytic_activity
gi|225441236	|225441236	biological_regulation cellular_component_organization_or_biogenesis cellular_process developmental_process establishment_of_localization immune_system_process localization metabolic_process multi-organism_process multicellular_organismal_process regulation_of_biological_process reproduction reproductive_process response_to_stimulus single-organism_process	cell cell_part extracellular_region membrane organelle organelle_part	binding catalytic_activity
gi|3850621	|3850621	biological_regulation cellular_component_organization_or_biogenesis cellular_process developmental_process establishment_of_localization immune_system_process localization metabolic_process multi-organism_process multicellular_organismal_process negative_regulation_of_biological_process positive_regulation_of_biological_process regulation_of_biological_process reproduction reproductive_process re…	cell cell_junction cell_part extracellular_region macromolecular_complex membrane organelle organelle_part symplast	binding catalytic_activity nutrient_reservoir_activity
gi|222857785	|222857785	cellular_component_organization_or_biogenesis cellular_process developmental_process single-organism_process	extracellular_region membrane
gi|6382043	|6382043	cellular_process metabolic_process	cell cell_part organelle	binding catalytic_activity
gi|222858686	|222858686	cellular_component_organization_or_biogenesis cellular_process establishment_of_localization localization metabolic_process multicellular_organismal_process response_to_stimulus single-organism_process	cell cell_part macromolecular_complex membrane membrane_part organelle organelle_part	catalytic_activity structural_molecule_activity transporter_activity
gi|255561967	|255561967	cellular_process developmental_process immune_system_process metabolic_process multi-organism_process multicellular_organismal_process response_to_stimulus single-organism_process		binding catalytic_activity
gi|242096596	|242096596	cellular_component_organization_or_biogenesis cellular_process single-organism_process		binding
gi|222618532	|222618532	metabolic_process	cell cell_part macromolecular_complex organelle	binding catalytic_activity
gi|194699266	|194699266	cellular_component_organization_or_biogenesis cellular_process metabolic_process response_to_stimulus	cell cell_part macromolecular_complex membrane membrane-enclosed_lumen organelle organelle_part	binding structural_molecule_activity
gi|12744892	|12744892	response_to_stimulus	cell cell_part organelle	binding catalytic_activity
gi|296040743	|296040743	cellular_process metabolic_process	cell cell_part membrane organelle	binding catalytic_activity
gi|302780807	|302780807	cellular_process metabolic_process	membrane	binding catalytic_activity transporter_activity
gi|148909829	|148909829	biological_regulation cellular_process establishment_of_localization localization metabolic_process regulation_of_biological_process response_to_stimulus single-organism_process	cell cell_part membrane membrane_part organelle	binding catalytic_activity transporter_activity
gi|222845755	|222845755		cell cell_part organelle	binding
gi|115453271	|115453271	cellular_process metabolic_process	cell cell_junction cell_part macromolecular_complex membrane membrane-enclosed_lumen organelle organelle_part symplast	binding structural_molecule_activity
gi|255560497	|255560497	biological_regulation cellular_component_organization_or_biogenesis cellular_process establishment_of_localization localization metabolic_process negative_regulation_of_biological_process regulation_of_biological_process response_to_stimulus single-organism_process	cell cell_part macromolecular_complex membrane membrane_part organelle organelle_part	binding catalytic_activity transporter_activity
gi|197305612	|197305612	cellular_component_organization_or_biogenesis cellular_process single-organism_process	extracellular_region membrane
gi|227206320	|227206320	cellular_component_organization_or_biogenesis cellular_process developmental_process establishment_of_localization localization metabolic_process multicellular_organismal_process response_to_stimulus single-organism_process	cell cell_part organelle organelle_part	binding catalytic_activity
gi|16119014	|16119014	cellular_component_organization_or_biogenesis cellular_process metabolic_process response_to_stimulus	cell cell_part macromolecular_complex membrane membrane_part organelle organelle_part	binding catalytic_activity electron_carrier_activity
gi|190613887	|190613887	response_to_stimulus
gi|297742384	|297742384	cellular_component_organization_or_biogenesis cellular_process metabolic_process single-organism_process	cell cell_part macromolecular_complex membrane organelle organelle_part	binding structural_molecule_activity
gi|255571945	|255571945	biological_regulation cellular_component_organization_or_biogenesis cellular_process developmental_process establishment_of_localization immune_system_process localization metabolic_process multi-organism_process multicellular_organismal_process regulation_of_biological_process reproduction reproductive_process response_to_stimulus single-organism_process	cell cell_part extracellular_region membrane organelle organelle_part	binding catalytic_activity
gi|242042059	|242042059	biological_regulation cellular_component_organization_or_biogenesis cellular_process establishment_of_localization localization metabolic_process response_to_stimulus single-organism_process	cell cell_junction cell_part extracellular_region membrane organelle organelle_part symplast	antioxidant_activity binding catalytic_activity
gi|222855217	|222855217	cellular_process metabolic_process	cell cell_part macromolecular_complex membrane organelle	binding catalytic_activity
gi|300634259	|300634259	cellular_process metabolic_process	cell cell_part organelle	catalytic_activity
gi|222839154	|222839154	cellular_process metabolic_process	cell cell_part organelle	binding catalytic_activity
gi|255554865	|255554865	cellular_process metabolic_process response_to_stimulus	cell cell_part membrane organelle organelle_part	binding catalytic_activity
gi|222867498	|222867498	cellular_process establishment_of_localization localization single-organism_process	cell cell_junction cell_part membrane membrane_part organelle symplast	binding transporter_activity
gi|147782460	|147782460	cellular_component_organization_or_biogenesis cellular_process developmental_process growth multi-organism_process multicellular_organismal_process reproduction reproductive_process response_to_stimulus single-organism_process	cell cell_part macromolecular_complex membrane membrane-enclosed_lumen organelle organelle_part	binding catalytic_activity
gi|224133084	|224133084	biological_regulation cellular_component_organization_or_biogenesis cellular_process metabolic_process regulation_of_biological_process response_to_stimulus single-organism_process	cell cell_part	binding catalytic_activity
gi|297734039	|297734039	cellular_process establishment_of_localization localization metabolic_process response_to_stimulus single-organism_process	cell cell_part membrane membrane_part	binding catalytic_activity transporter_activity
gi|224126451	|224126451	cellular_component_organization_or_biogenesis cellular_process developmental_process growth reproduction single-organism_process	extracellular_region
gi|255551551	|255551551	metabolic_process		catalytic_activity
gi|4204861	|4204861	cellular_process developmental_process metabolic_process multicellular_organismal_process response_to_stimulus single-organism_process	cell cell_part membrane organelle	binding
gi|194706026	|194706026	biological_regulation cellular_component_organization_or_biogenesis cellular_process developmental_process growth multi-organism_process multicellular_organismal_process regulation_of_biological_process reproduction reproductive_process response_to_stimulus single-organism_process	cell cell_part extracellular_region membrane organelle
gi|296085860	|296085860	cellular_process developmental_process metabolic_process multicellular_organismal_process reproduction reproductive_process single-organism_process	cell cell_part membrane-enclosed_lumen organelle organelle_part	binding enzyme_regulator_activity
gi|158512869	|158512869	cellular_process metabolic_process	cell cell_part membrane organelle	binding catalytic_activity
gi|297739789	|297739789		cell cell_part organelle	binding catalytic_activity
gi|1173256	|1173256	cellular_process metabolic_process	cell cell_part macromolecular_complex membrane membrane-enclosed_lumen organelle organelle_part	binding structural_molecule_activity
gi|255569710	|255569710	cellular_process establishment_of_localization localization metabolic_process multi-organism_process response_to_stimulus single-organism_process	cell cell_part membrane organelle organelle_part	transporter_activity
gi|255627603	|255627603	cellular_process metabolic_process response_to_stimulus	cell cell_part membrane organelle organelle_part	binding catalytic_activity
gi|225428853	|225428853	cellular_process metabolic_process	cell cell_part macromolecular_complex membrane membrane-enclosed_lumen organelle organelle_part	structural_molecule_activity
gi|37927472	|37927472	biological_regulation cellular_process metabolic_process regulation_of_biological_process	cell cell_part macromolecular_complex membrane membrane_part organelle organelle_part	binding
gi|122166820	|122166820	cellular_process establishment_of_localization localization metabolic_process single-organism_process	cell cell_part macromolecular_complex membrane membrane_part organelle organelle_part	binding catalytic_activity transporter_activity
gi|1041768	|1041768	cellular_component_organization_or_biogenesis cellular_process developmental_process establishment_of_localization localization metabolic_process multicellular_organismal_process response_to_stimulus single-organism_process	cell cell_part macromolecular_complex membrane membrane_part organelle organelle_part	binding catalytic_activity transporter_activity
gi|122166806	|122166806	cellular_process metabolic_process	cell cell_part macromolecular_complex membrane membrane_part organelle organelle_part	binding catalytic_activity electron_carrier_activity
gi|3914606	|3914606	cellular_process metabolic_process	cell cell_part organelle	catalytic_activity
gi|222850390	|222850390	biological_regulation cellular_process metabolic_process regulation_of_biological_process single-organism_process	cell cell_part membrane organelle	binding catalytic_activity
gi|7677038	|7677038	cellular_process metabolic_process	cell cell_part organelle	binding catalytic_activity
gi|302787967	|302787967	cellular_component_organization_or_biogenesis cellular_process developmental_process metabolic_process multicellular_organismal_process reproduction reproductive_process single-organism_process	cell cell_part extracellular_region macromolecular_complex membrane organelle organelle_part	binding
gi|23197684	|23197684	biological_regulation cellular_process immune_system_process localization metabolic_process multi-organism_process regulation_of_biological_process response_to_stimulus	cell cell_part organelle organelle_part	binding catalytic_activity electron_carrier_activity
gi|168414974	|168414974	cellular_component_organization_or_biogenesis cellular_process multi-organism_process response_to_stimulus single-organism_process	cell cell_part membrane organelle organelle_part	structural_molecule_activity
gi|296511947	|296511947	cellular_process metabolic_process response_to_stimulus single-organism_process	cell cell_part organelle organelle_part	binding catalytic_activity electron_carrier_activity
gi|297735045	|297735045	cellular_process metabolic_process response_to_stimulus	cell cell_part extracellular_region macromolecular_complex membrane organelle organelle_part	catalytic_activity
gi|222843589	|222843589	cellular_component_organization_or_biogenesis cellular_process metabolic_process response_to_stimulus	cell cell_part organelle	binding catalytic_activity
gi|255567666	|255567666			catalytic_activity
gi|222856024	|222856024		cell cell_part membrane membrane-enclosed_lumen organelle organelle_part	binding
gi|125552186	|125552186		cell cell_part membrane organelle organelle_part
gi|225439902	|225439902	cellular_process metabolic_process	cell cell_part	binding catalytic_activity
gi|297844046	|297844046	cellular_process metabolic_process response_to_stimulus single-organism_process	cell cell_part organelle	binding
gi|225456096	|225456096	cellular_process developmental_process metabolic_process multicellular_organismal_process response_to_stimulus single-organism_process	cell cell_part macromolecular_complex membrane-enclosed_lumen organelle organelle_part	catalytic_activity
gi|118489117	|118489117	biological_regulation cellular_process developmental_process metabolic_process multicellular_organismal_process regulation_of_biological_process reproduction reproductive_process response_to_stimulus single-organism_process	cell cell_part membrane organelle organelle_part	catalytic_activity electron_carrier_activity
gi|297790552	|297790552		cell cell_part membrane organelle organelle_part
gi|168069345	|168069345	cellular_component_organization_or_biogenesis cellular_process metabolic_process single-organism_process	cell cell_part macromolecular_complex organelle organelle_part	binding catalytic_activity structural_molecule_activity
gi|17939851	|17939851	cellular_component_organization_or_biogenesis cellular_process establishment_of_localization localization metabolic_process response_to_stimulus single-organism_process	cell cell_part macromolecular_complex membrane membrane_part membrane-enclosed_lumen organelle organelle_part	binding catalytic_activity transporter_activity
gi|299829978	|299829978	cellular_process metabolic_process	cell cell_part macromolecular_complex organelle organelle_part	structural_molecule_activity
gi|255569265	|255569265	cellular_process metabolic_process	cell cell_part macromolecular_complex membrane organelle organelle_part	binding structural_molecule_activity
gi|222840920	|222840920		cell cell_part membrane organelle
gi|297738788	|297738788	cellular_component_organization_or_biogenesis cellular_process developmental_process establishment_of_localization localization metabolic_process multicellular_organismal_process reproduction reproductive_process response_to_stimulus single-organism_process	cell cell_part organelle organelle_part	binding
gi|255560331	|255560331	cellular_process metabolic_process	cell cell_part membrane organelle organelle_part	binding
gi|222856308	|222856308	metabolic_process	cell cell_part membrane organelle	binding catalytic_activity
gi|265679083	|265679083	metabolic_process response_to_stimulus	cell cell_part membrane organelle organelle_part	antioxidant_activity catalytic_activity
gi|31324469	|31324469	metabolic_process		catalytic_activity
gi|300828289	|300828289	cellular_process metabolic_process response_to_stimulus	cell cell_part organelle	binding catalytic_activity
gi|242087069	|242087069	cellular_process metabolic_process response_to_stimulus	cell cell_part membrane organelle organelle_part	binding catalytic_activity
gi|1351206	|1351206	cellular_process developmental_process growth metabolic_process multicellular_organismal_process response_to_stimulus single-organism_process	cell cell_part membrane organelle	binding catalytic_activity electron_carrier_activity
gi|225429870	|225429870	cellular_process metabolic_process response_to_stimulus	cell cell_part	binding catalytic_activity
gi|297742929	|297742929	cellular_process metabolic_process response_to_stimulus	cell cell_part organelle	binding catalytic_activity
gi|158726716	|158726716	developmental_process multicellular_organismal_process response_to_stimulus single-organism_process		binding
gi|162462751	|162462751	cellular_process establishment_of_localization localization metabolic_process response_to_stimulus single-organism_process	cell cell_part macromolecular_complex membrane membrane_part membrane-enclosed_lumen organelle organelle_part	binding catalytic_activity transporter_activity
gi|297820562	|297820562	cellular_process metabolic_process response_to_stimulus	cell cell_part extracellular_region organelle organelle_part	binding catalytic_activity
gi|131135	|131135	cellular_process metabolic_process response_to_stimulus	cell cell_part macromolecular_complex membrane membrane_part organelle organelle_part	binding catalytic_activity electron_carrier_activity
gi|262400743	|262400743	cellular_component_organization_or_biogenesis cellular_process metabolic_process	cell cell_part macromolecular_complex membrane membrane_part organelle organelle_part	binding
gi|74273623	|74273623	biological_regulation cellular_component_organization_or_biogenesis cellular_process developmental_process growth metabolic_process response_to_stimulus single-organism_process	cell cell_part membrane membrane_part organelle	binding catalytic_activity
gi|224138112	|224138112	establishment_of_localization localization single-organism_process	cell cell_part membrane membrane_part organelle
gi|172041706	|172041706	biological_regulation cellular_component_organization_or_biogenesis cellular_process metabolic_process regulation_of_biological_process response_to_stimulus single-organism_process	cell cell_part extracellular_region organelle	binding catalytic_activity
gi|225456676	|225456676	biological_regulation cellular_process developmental_process growth metabolic_process multicellular_organismal_process regulation_of_biological_process single-organism_process	cell cell_junction cell_part membrane organelle organelle_part symplast	binding catalytic_activity
gi|303324969	|303324969	cellular_process metabolic_process	cell cell_part macromolecular_complex membrane membrane_part organelle organelle_part
gi|257307287	|257307287	cellular_component_organization_or_biogenesis cellular_process developmental_process metabolic_process multicellular_organismal_process response_to_stimulus single-organism_process	cell cell_part membrane organelle	binding catalytic_activity
gi|2494844	|2494844	response_to_stimulus	cell cell_part organelle	binding catalytic_activity
gi|295420939	|295420939	cellular_process developmental_process metabolic_process response_to_stimulus single-organism_process	cell cell_part extracellular_region membrane organelle	binding catalytic_activity
gi|32328724	|32328724	cellular_process metabolic_process	cell cell_part organelle organelle_part	binding catalytic_activity
gi|242090757	|242090757	cellular_component_organization_or_biogenesis cellular_process metabolic_process single-organism_process	cell cell_junction cell_part macromolecular_complex membrane organelle organelle_part symplast	structural_molecule_activity
gi|297739006	|297739006	biological_regulation cellular_component_organization_or_biogenesis cellular_process establishment_of_localization immune_system_process localization metabolic_process positive_regulation_of_biological_process regulation_of_biological_process response_to_stimulus single-organism_process	cell cell_part membrane membrane_part organelle organelle_part
gi|195635409	|195635409	cellular_component_organization_or_biogenesis cellular_process metabolic_process response_to_stimulus single-organism_process	cell cell_junction cell_part macromolecular_complex membrane membrane-enclosed_lumen organelle organelle_part symplast	binding
gi|118175929	|118175929	biological_regulation cellular_component_organization_or_biogenesis cellular_process developmental_process establishment_of_localization immune_system_process localization metabolic_process multi-organism_process multicellular_organismal_process negative_regulation_of_biological_process regulation_of_biological_process response_to_stimulus signaling single-organism_process	cell cell_part extracellular_region organelle organelle_part	binding catalytic_activity
gi|23197868	|23197868	metabolic_process	cell cell_part organelle	binding catalytic_activity
gi|295421883	|295421883	biological_regulation cellular_process metabolic_process regulation_of_biological_process	cell cell_part membrane organelle organelle_part	binding catalytic_activity
gi|13958640	|13958640	metabolic_process		binding catalytic_activity
gi|255645048	|255645048	biological_regulation cellular_component_organization_or_biogenesis cellular_process developmental_process metabolic_process multicellular_organismal_process regulation_of_biological_process response_to_stimulus single-organism_process	cell cell_part macromolecular_complex membrane membrane_part membrane-enclosed_lumen organelle organelle_part	binding catalytic_activity
gi|255557048	|255557048	metabolic_process multi-organism_process response_to_stimulus	cell cell_part extracellular_region	antioxidant_activity binding catalytic_activity
gi|241865475	|241865475	metabolic_process	cell cell_part macromolecular_complex membrane membrane_part organelle organelle_part	binding catalytic_activity
gi|63056126	|63056126	biological_regulation cellular_component_organization_or_biogenesis cellular_process developmental_process establishment_of_localization growth localization metabolic_process multicellular_organismal_process response_to_stimulus single-organism_process	cell cell_junction cell_part membrane organelle organelle_part symplast	binding structural_molecule_activity
gi|296089520	|296089520	cellular_component_organization_or_biogenesis cellular_process developmental_process establishment_of_localization growth localization multi-organism_process multicellular_organismal_process reproduction reproductive_process single-organism_process	cell cell_part extracellular_region membrane membrane_part organelle	transporter_activity
gi|297746501	|297746501	cellular_component_organization_or_biogenesis cellular_process developmental_process immune_system_process metabolic_process multi-organism_process multicellular_organismal_process reproduction reproductive_process response_to_stimulus single-organism_process	cell cell_part extracellular_region macromolecular_complex membrane membrane-enclosed_lumen organelle organelle_part	binding
gi|5123836	|5123836	cellular_process metabolic_process response_to_stimulus	cell cell_part extracellular_region membrane organelle organelle_part	binding catalytic_activity
gi|255630208	|255630208	cellular_process metabolic_process multi-organism_process response_to_stimulus	cell cell_junction cell_part extracellular_region organelle symplast
gi|118482855	|118482855	cellular_component_organization_or_biogenesis cellular_process metabolic_process	cell cell_part	binding
gi|552956	|552956	cellular_process establishment_of_localization localization metabolic_process single-organism_process	cell cell_part macromolecular_complex membrane membrane_part organelle organelle_part	binding catalytic_activity transporter_activity
gi|78210838	|78210838	biological_regulation cellular_component_organization_or_biogenesis cellular_process developmental_process growth metabolic_process multicellular_organismal_process response_to_stimulus single-organism_process	cell cell_part macromolecular_complex organelle organelle_part	binding catalytic_activity structural_molecule_activity
gi|297807659	|297807659	cellular_component_organization_or_biogenesis cellular_process metabolic_process single-organism_process	cell cell_part organelle	binding catalytic_activity
gi|21360782	|21360782	cellular_process metabolic_process	cell cell_part organelle	binding catalytic_activity
gi|37725088	|37725088	cellular_process establishment_of_localization localization metabolic_process response_to_stimulus single-organism_process	cell cell_part macromolecular_complex membrane membrane_part membrane-enclosed_lumen organelle organelle_part	binding catalytic_activity transporter_activity
gi|255539230	|255539230	establishment_of_localization localization single-organism_process	cell cell_part membrane membrane_part organelle organelle_part	molecular_transducer_activity receptor_activity
gi|298204799	|298204799	cellular_process establishment_of_localization localization single-organism_process	cell cell_junction cell_part macromolecular_complex membrane membrane_part organelle organelle_part symplast	binding structural_molecule_activity
gi|168035690	|168035690	biological_regulation cellular_component_organization_or_biogenesis cellular_process metabolic_process multi-organism_process regulation_of_biological_process response_to_stimulus single-organism_process	cell cell_part extracellular_region organelle organelle_part	binding catalytic_activity
gi|255584818	|255584818	metabolic_process	cell cell_part macromolecular_complex organelle	binding catalytic_activity
gi|226488408	|226488408	biological_regulation cellular_process developmental_process localization metabolic_process multi-organism_process multicellular_organismal_process regulation_of_biological_process response_to_stimulus signaling single-organism_process	cell cell_part membrane organelle organelle_part	binding catalytic_activity
gi|217072654	|217072654	biological_regulation cellular_process developmental_process metabolic_process multi-organism_process multicellular_organismal_process regulation_of_biological_process reproduction reproductive_process response_to_stimulus single-organism_process	cell cell_part membrane organelle	catalytic_activity electron_carrier_activity
gi|297734461	|297734461	biological_regulation cellular_component_organization_or_biogenesis cellular_process developmental_process establishment_of_localization localization metabolic_process multicellular_organismal_process positive_regulation_of_biological_process regulation_of_biological_process response_to_stimulus single-organism_process	cell cell_part extracellular_region organelle organelle_part	binding catalytic_activity
gi|217073938	|217073938	biological_regulation cellular_component_organization_or_biogenesis cellular_process developmental_process immune_system_process metabolic_process multi-organism_process multicellular_organismal_process negative_regulation_of_biological_process regulation_of_biological_process reproduction reproductive_process response_to_stimulus signaling single-organism_process	cell cell_part organelle organelle_part	binding catalytic_activity enzyme_regulator_activity
gi|222853279	|222853279	biological_regulation cellular_process metabolic_process regulation_of_biological_process response_to_stimulus signaling single-organism_process	cell cell_part macromolecular_complex organelle organelle_part	catalytic_activity
gi|296084957	|296084957	biological_regulation cellular_component_organization_or_biogenesis cellular_process establishment_of_localization localization metabolic_process multi-organism_process positive_regulation_of_biological_process regulation_of_biological_process response_to_stimulus signaling single-organism_process	cell cell_part macromolecular_complex membrane membrane_part organelle organelle_part	binding
gi|296087158	|296087158	cellular_process metabolic_process	cell cell_part organelle organelle_part	catalytic_activity
gi|255625927	|255625927	biological_regulation cellular_component_organization_or_biogenesis cellular_process metabolic_process single-organism_process	cell cell_part membrane membrane_part organelle
gi|118486677	|118486677	cellular_component_organization_or_biogenesis cellular_process metabolic_process response_to_stimulus single-organism_process	cell cell_part membrane	binding
gi|227305852	|227305852	biological_regulation cellular_component_organization_or_biogenesis cellular_process developmental_process metabolic_process multicellular_organismal_process positive_regulation_of_biological_process regulation_of_biological_process response_to_stimulus single-organism_process	cell cell_part extracellular_region macromolecular_complex organelle organelle_part	binding catalytic_activity
gi|297746435	|297746435	establishment_of_localization localization single-organism_process	cell cell_part membrane	binding
gi|5881118	|5881118	cellular_process metabolic_process		binding catalytic_activity
gi|218188155	|218188155		membrane	binding catalytic_activity
gi|323148902	|323148902	cellular_process metabolic_process	cell cell_part macromolecular_complex membrane membrane_part organelle organelle_part	binding electron_carrier_activity
gi|255631107	|255631107	cellular_process metabolic_process	cell cell_part macromolecular_complex membrane membrane_part organelle organelle_part	catalytic_activity transporter_activity
gi|255638437	|255638437	cellular_process metabolic_process response_to_stimulus	cell cell_part macromolecular_complex membrane membrane_part organelle organelle_part
gi|297738089	|297738089			binding catalytic_activity
gi|255543963	|255543963	metabolic_process	cell cell_part extracellular_region organelle	catalytic_activity
gi|226507186	|226507186	cellular_process metabolic_process response_to_stimulus	cell cell_part extracellular_region membrane membrane-enclosed_lumen organelle organelle_part	binding catalytic_activity
gi|74231420	|74231420	metabolic_process
gi|222853475	|222853475	cellular_process establishment_of_localization localization metabolic_process response_to_stimulus single-organism_process	cell cell_part extracellular_region membrane organelle organelle_part
gi|118486395	|118486395	cellular_process metabolic_process response_to_stimulus	cell cell_part extracellular_region membrane organelle	binding catalytic_activity
gi|224031309	|224031309	biological_regulation cellular_component_organization_or_biogenesis cellular_process metabolic_process negative_regulation_of_biological_process regulation_of_biological_process single-organism_process	cell cell_part membrane organelle	binding catalytic_activity
gi|148886767	|148886767		cell cell_part membrane organelle	binding
gi|161318161	|161318161	cellular_process metabolic_process		binding catalytic_activity
gi|56606534	|56606534		cell cell_part membrane
gi|109715578	|109715578	biological_regulation cellular_component_organization_or_biogenesis cellular_process developmental_process establishment_of_localization localization metabolic_process multicellular_organismal_process positive_regulation_of_biological_process regulation_of_biological_process reproduction reproductive_process single-organism_process	cell cell_part organelle organelle_part	binding catalytic_activity transporter_activity
gi|224119852	|224119852	biological_adhesion biological_regulation cellular_component_organization_or_biogenesis cellular_process developmental_process localization metabolic_process multicellular_organismal_process positive_regulation_of_biological_process regulation_of_biological_process reproduction reproductive_process response_to_stimulus signaling single-organism_process	cell cell_part membrane organelle	binding
gi|148466438	|148466438		cell cell_part macromolecular_complex organelle
gi|302774424	|302774424	cellular_process metabolic_process response_to_stimulus	cell cell_part extracellular_region macromolecular_complex membrane organelle organelle_part	catalytic_activity
gi|147834872	|147834872	response_to_stimulus	cell cell_part membrane membrane-enclosed_lumen organelle organelle_part	binding catalytic_activity
gi|190151606	|190151606	metabolic_process		binding catalytic_activity
gi|118486859	|118486859	cellular_process metabolic_process		binding catalytic_activity
gi|302759186	|302759186	cellular_process developmental_process metabolic_process multicellular_organismal_process single-organism_process	cell cell_part organelle organelle_part	binding catalytic_activity
gi|559235	|559235	metabolic_process response_to_stimulus	cell cell_part membrane organelle	antioxidant_activity binding catalytic_activity
gi|109157231	|109157231	cellular_process metabolic_process	cell cell_part macromolecular_complex membrane membrane_part organelle organelle_part	binding
gi|218184832	|218184832	biological_regulation cellular_component_organization_or_biogenesis cellular_process growth metabolic_process negative_regulation_of_biological_process regulation_of_biological_process single-organism_process	cell cell_part membrane organelle organelle_part	binding
gi|224120086	|224120086	cellular_process establishment_of_localization localization metabolic_process response_to_stimulus single-organism_process	cell cell_part extracellular_region organelle organelle_part	binding catalytic_activity
gi|222864941	|222864941	metabolic_process	cell cell_part organelle organelle_part	binding catalytic_activity
gi|253992223	|253992223	cellular_process metabolic_process	cell cell_part organelle	binding catalytic_activity
gi|298553359	|298553359	cellular_process metabolic_process response_to_stimulus	cell cell_part extracellular_region organelle organelle_part	binding catalytic_activity
gi|153799772	|153799772	cellular_process metabolic_process	cell cell_part macromolecular_complex membrane membrane_part organelle organelle_part	binding catalytic_activity electron_carrier_activity transporter_activity
gi|222843535	|222843535	cellular_process metabolic_process response_to_stimulus single-organism_process	cell cell_part membrane organelle	binding catalytic_activity
gi|117662023	|117662023	metabolic_process response_to_stimulus	cell cell_part extracellular_region membrane membrane-enclosed_lumen organelle organelle_part	binding catalytic_activity
gi|17046459	|17046459	cellular_process metabolic_process		catalytic_activity
gi|255539549	|255539549	biological_regulation cellular_component_organization_or_biogenesis cellular_process developmental_process metabolic_process multi-organism_process multicellular_organismal_process positive_regulation_of_biological_process regulation_of_biological_process response_to_stimulus single-organism_process	cell cell_part organelle organelle_part	binding catalytic_activity
gi|227307922	|227307922	cellular_process immune_system_process metabolic_process multi-organism_process response_to_stimulus single-organism_process	cell cell_part extracellular_region macromolecular_complex membrane membrane-enclosed_lumen organelle organelle_part	binding catalytic_activity
gi|255562058	|255562058	biological_regulation cellular_process metabolic_process regulation_of_biological_process	cell cell_part extracellular_region organelle organelle_part	binding catalytic_activity
gi|295801573	|295801573	metabolic_process	cell cell_part organelle	binding catalytic_activity
gi|255570937	|255570937	cellular_process metabolic_process response_to_stimulus		binding catalytic_activity
gi|297746027	|297746027	cellular_component_organization_or_biogenesis cellular_process developmental_process establishment_of_localization localization metabolic_process multicellular_organismal_process response_to_stimulus rhythmic_process single-organism_process	cell cell_part membrane nucleoid organelle organelle_part
gi|297837151	|297837151	biological_regulation cellular_component_organization_or_biogenesis cellular_process developmental_process establishment_of_localization localization metabolic_process multicellular_organismal_process positive_regulation_of_biological_process regulation_of_biological_process reproduction reproductive_process single-organism_process	cell cell_part extracellular_region organelle organelle_part	binding catalytic_activity
gi|227205908	|227205908	developmental_process multicellular_organismal_process response_to_stimulus single-organism_process	cell cell_junction cell_part extracellular_region symplast
gi|257718013	|257718013	biological_regulation cellular_component_organization_or_biogenesis cellular_process developmental_process growth metabolic_process multi-organism_process multicellular_organismal_process reproduction reproductive_process single-organism_process	cell cell_part membrane organelle	catalytic_activity
gi|296086427	|296086427	cellular_process metabolic_process rhythmic_process	cell cell_part extracellular_region organelle organelle_part	binding catalytic_activity
gi|297746511	|297746511	cellular_component_organization_or_biogenesis cellular_process establishment_of_localization localization metabolic_process single-organism_process	cell cell_part	binding catalytic_activity
gi|5915696	|5915696	cellular_process metabolic_process response_to_stimulus single-organism_process		binding catalytic_activity
gi|17865463	|17865463	biological_regulation cellular_process metabolic_process negative_regulation_of_biological_process regulation_of_biological_process response_to_stimulus single-organism_process	cell cell_part membrane organelle organelle_part	binding catalytic_activity
gi|222424842	|222424842	cellular_process metabolic_process response_to_stimulus single-organism_process	cell cell_part organelle	binding catalytic_activity
gi|255557552	|255557552	cellular_process metabolic_process	cell cell_part organelle organelle_part	binding catalytic_activity
gi|225457674	|225457674	cellular_process metabolic_process response_to_stimulus	cell cell_part macromolecular_complex	binding catalytic_activity
gi|145334581	|145334581	cellular_process metabolic_process	cell cell_part organelle	catalytic_activity
gi|297801396	|297801396	cellular_component_organization_or_biogenesis cellular_process metabolic_process response_to_stimulus single-organism_process	cell cell_junction cell_part membrane organelle organelle_part symplast	binding catalytic_activity
gi|78096543	|78096543	multi-organism_process response_to_stimulus	cell cell_part organelle	binding
gi|296529744	|296529744	biological_regulation cellular_component_organization_or_biogenesis cellular_process establishment_of_localization localization metabolic_process regulation_of_biological_process response_to_stimulus single-organism_process	cell cell_part macromolecular_complex membrane membrane_part organelle organelle_part	binding catalytic_activity
gi|257341345	|257341345	biological_regulation cellular_process developmental_process immune_system_process metabolic_process multi-organism_process multicellular_organismal_process negative_regulation_of_biological_process regulation_of_biological_process reproduction reproductive_process response_to_stimulus single-organism_process	cell cell_part organelle	binding catalytic_activity
gi|297736606	|297736606	biological_regulation cellular_process metabolic_process regulation_of_biological_process response_to_stimulus signaling single-organism_process	cell cell_part membrane	binding catalytic_activity molecular_transducer_activity
gi|255626239	|255626239	cellular_process metabolic_process	cell cell_part macromolecular_complex membrane organelle organelle_part	binding structural_molecule_activity
gi|228552594	|228552594	biological_regulation cellular_process regulation_of_biological_process response_to_stimulus signaling single-organism_process	cell cell_part extracellular_region membrane organelle	binding
gi|213876486	|213876486	cellular_process metabolic_process multi-organism_process response_to_stimulus	cell cell_part membrane organelle organelle_part	binding catalytic_activity
gi|241865469	|241865469	cellular_process metabolic_process	cell cell_part macromolecular_complex membrane organelle organelle_part	catalytic_activity structural_molecule_activity
gi|225432854	|225432854	cellular_component_organization_or_biogenesis cellular_process developmental_process growth metabolic_process multicellular_organismal_process reproduction reproductive_process response_to_stimulus single-organism_process	cell cell_part organelle organelle_part	binding catalytic_activity
gi|112791579	|112791579	cellular_process immune_system_process metabolic_process multi-organism_process response_to_stimulus single-organism_process	cell cell_part membrane organelle	catalytic_activity
gi|222852205	|222852205	biological_regulation cellular_component_organization_or_biogenesis cellular_process developmental_process establishment_of_localization growth localization metabolic_process positive_regulation_of_biological_process regulation_of_biological_process response_to_stimulus signaling single-organism_process	cell cell_part membrane	enzyme_regulator_activity
gi|255564051	|255564051	biological_regulation cellular_process establishment_of_localization localization metabolic_process multi-organism_process response_to_stimulus single-organism_process	cell cell_part membrane organelle organelle_part
gi|296090268	|296090268	cellular_process metabolic_process response_to_stimulus	cell cell_part organelle	binding catalytic_activity
gi|295420957	|295420957	cellular_process developmental_process metabolic_process multi-organism_process multicellular_organismal_process reproduction reproductive_process response_to_stimulus single-organism_process	cell cell_part extracellular_region organelle organelle_part	binding catalytic_activity
gi|75755918	|75755918	metabolic_process	cell cell_part membrane membrane_part organelle organelle_part	binding catalytic_activity
gi|229611656	|229611656	cellular_process establishment_of_localization localization metabolic_process response_to_stimulus single-organism_process	cell cell_junction cell_part symplast	binding
gi|257626367	|257626367	cellular_process metabolic_process		catalytic_activity
gi|13096169	|13096169	biological_regulation cellular_component_organization_or_biogenesis cellular_process developmental_process establishment_of_localization immune_system_process localization metabolic_process multi-organism_process multicellular_organismal_process negative_regulation_of_biological_process regulation_of_biological_process response_to_stimulus signaling single-organism_process	cell cell_part extracellular_region membrane organelle organelle_part	binding catalytic_activity electron_carrier_activity
gi|226510460	|226510460	cellular_component_organization_or_biogenesis cellular_process developmental_process growth multicellular_organismal_process response_to_stimulus single-organism_process	cell cell_part membrane organelle	binding
gi|168038040	|168038040	cellular_process metabolic_process single-organism_process	cell cell_part organelle	binding
gi|241865406	|241865406	cellular_component_organization_or_biogenesis cellular_process metabolic_process	cell cell_junction cell_part macromolecular_complex membrane membrane-enclosed_lumen organelle organelle_part symplast	binding structural_molecule_activity
gi|168007855	|168007855	cellular_process metabolic_process response_to_stimulus	cell cell_part organelle	catalytic_activity
gi|134086091	|134086091	biological_regulation cellular_process metabolic_process positive_regulation_of_biological_process regulation_of_biological_process		catalytic_activity
gi|255634883	|255634883	cellular_component_organization_or_biogenesis cellular_process developmental_process metabolic_process multicellular_organismal_process single-organism_process	cell cell_part membrane organelle organelle_part
gi|117671302	|117671302	cellular_process metabolic_process	cell cell_part macromolecular_complex membrane membrane-enclosed_lumen organelle organelle_part	structural_molecule_activity
gi|298541583	|298541583	cellular_process metabolic_process	cell cell_part extracellular_region membrane organelle	catalytic_activity
gi|255558409	|255558409	biological_regulation cellular_process metabolic_process regulation_of_biological_process single-organism_process	cell cell_part organelle	catalytic_activity electron_carrier_activity
gi|255558216	|255558216	biological_regulation cellular_process establishment_of_localization localization multi-organism_process regulation_of_biological_process response_to_stimulus single-organism_process	cell cell_part membrane membrane-enclosed_lumen organelle organelle_part	transporter_activity
gi|168037018	|168037018	cellular_process developmental_process metabolic_process multicellular_organismal_process single-organism_process	cell cell_junction cell_part membrane organelle organelle_part symplast	binding catalytic_activity
gi|255540953	|255540953	cellular_process metabolic_process response_to_stimulus	extracellular_region	binding catalytic_activity transporter_activity
gi|242094848	|242094848	cellular_process metabolic_process response_to_stimulus	cell cell_part macromolecular_complex organelle	catalytic_activity
gi|255585554	|255585554	cellular_process metabolic_process	cell cell_part organelle organelle_part	catalytic_activity
gi|147795381	|147795381	biological_regulation cellular_process establishment_of_localization localization metabolic_process regulation_of_biological_process response_to_stimulus single-organism_process	cell cell_part organelle organelle_part	binding catalytic_activity
gi|224152461	|224152461	cellular_component_organization_or_biogenesis cellular_process metabolic_process response_to_stimulus	cell cell_part macromolecular_complex membrane membrane_part organelle organelle_part	binding catalytic_activity
gi|222624328	|222624328		cell cell_part extracellular_region organelle
gi|302393753	|302393753		cell cell_part macromolecular_complex organelle
gi|195929365	|195929365	cellular_process developmental_process immune_system_process metabolic_process multi-organism_process multicellular_organismal_process response_to_stimulus single-organism_process		binding catalytic_activity
gi|226499948	|226499948	cellular_process metabolic_process	cell cell_part	binding catalytic_activity
gi|225346586	|225346586	cellular_process metabolic_process	cell cell_part macromolecular_complex membrane membrane_part organelle organelle_part	binding electron_carrier_activity
gi|13548760	|13548760	cellular_process metabolic_process	cell cell_part organelle	binding catalytic_activity
gi|126022831	|126022831			binding catalytic_activity
gi|302782229	|302782229	biological_regulation cellular_process metabolic_process negative_regulation_of_biological_process positive_regulation_of_biological_process regulation_of_biological_process response_to_stimulus signaling single-organism_process	cell cell_part membrane organelle organelle_part	binding nucleic_acid_binding_transcription_factor_activity
gi|110289355	|110289355	cellular_process metabolic_process	cell cell_part organelle	binding catalytic_activity
gi|1707932	|1707932	cellular_component_organization_or_biogenesis cellular_process establishment_of_localization localization metabolic_process response_to_stimulus single-organism_process	cell cell_part organelle organelle_part	catalytic_activity
gi|168012925	|168012925	biological_regulation cellular_process developmental_process metabolic_process multicellular_organismal_process reproduction reproductive_process single-organism_process	cell cell_part macromolecular_complex membrane	binding catalytic_activity
gi|222866207	|222866207	biological_regulation cellular_component_organization_or_biogenesis cellular_process metabolic_process regulation_of_biological_process single-organism_process	cell cell_part	catalytic_activity enzyme_regulator_activity
gi|166928	|166928	cellular_process metabolic_process response_to_stimulus single-organism_process	cell cell_part organelle
gi|108706134	|108706134	cellular_process metabolic_process response_to_stimulus	cell cell_part macromolecular_complex membrane membrane-enclosed_lumen organelle organelle_part	binding
gi|222859933	|222859933	cellular_process metabolic_process response_to_stimulus	cell cell_part membrane organelle organelle_part
gi|297741633	|297741633	cellular_component_organization_or_biogenesis cellular_process developmental_process growth multi-organism_process multicellular_organismal_process reproduction reproductive_process response_to_stimulus single-organism_process	cell cell_part macromolecular_complex membrane membrane-enclosed_lumen organelle organelle_part	binding catalytic_activity
gi|223974323	|223974323	cellular_process metabolic_process	cell cell_part macromolecular_complex organelle organelle_part	binding structural_molecule_activity
gi|168031643	|168031643	cellular_process developmental_process metabolic_process multicellular_organismal_process reproduction reproductive_process response_to_stimulus single-organism_process	cell cell_part membrane membrane-enclosed_lumen organelle organelle_part	binding catalytic_activity
gi|6635336	|6635336	cellular_process metabolic_process	cell cell_part macromolecular_complex membrane membrane_part organelle organelle_part
gi|222843888	|222843888	metabolic_process response_to_stimulus	cell cell_part membrane organelle	antioxidant_activity binding catalytic_activity
gi|222846498	|222846498	biological_regulation cellular_process metabolic_process regulation_of_biological_process response_to_stimulus signaling single-organism_process	cell cell_junction cell_part extracellular_region membrane organelle symplast	catalytic_activity
gi|126216286	|126216286	cellular_process metabolic_process	cell cell_part organelle	binding catalytic_activity
gi|129560450	|129560450	biological_regulation cellular_process establishment_of_localization localization regulation_of_biological_process response_to_stimulus signaling single-organism_process	cell cell_part membrane organelle	binding
gi|297792271	|297792271	cellular_component_organization_or_biogenesis cellular_process developmental_process establishment_of_localization localization metabolic_process multicellular_organismal_process reproduction reproductive_process response_to_stimulus single-organism_process	cell cell_part extracellular_region organelle organelle_part	binding catalytic_activity
gi|255575683	|255575683	cellular_component_organization_or_biogenesis cellular_process metabolic_process single-organism_process	cell cell_part macromolecular_complex membrane organelle organelle_part	binding catalytic_activity structural_molecule_activity
gi|134273562	|134273562	cellular_component_organization_or_biogenesis cellular_process developmental_process metabolic_process multicellular_organismal_process response_to_stimulus single-organism_process	cell cell_part membrane	binding catalytic_activity
gi|12585296	|12585296	biological_regulation cellular_process developmental_process metabolic_process multicellular_organismal_process response_to_stimulus single-organism_process	cell cell_part membrane organelle organelle_part	binding catalytic_activity
gi|255641292	|255641292	biological_regulation cellular_process establishment_of_localization immune_system_process localization metabolic_process multi-organism_process negative_regulation_of_biological_process regulation_of_biological_process reproduction reproductive_process response_to_stimulus signaling single-organism_process	cell cell_part organelle	binding
gi|255537515	|255537515	cellular_process metabolic_process response_to_stimulus	cell cell_part extracellular_region membrane organelle organelle_part	binding catalytic_activity
gi|222858015	|222858015	cellular_process metabolic_process		binding catalytic_activity
gi|255582806	|255582806	biological_regulation cellular_process developmental_process metabolic_process multicellular_organismal_process regulation_of_biological_process reproduction reproductive_process response_to_stimulus single-organism_process	cell cell_part extracellular_region membrane membrane-enclosed_lumen organelle organelle_part	binding
gi|242082021	|242082021	response_to_stimulus	cell cell_part membrane organelle organelle_part	binding
gi|188509922	|188509922	biological_regulation cellular_component_organization_or_biogenesis cellular_process developmental_process metabolic_process multicellular_organismal_process regulation_of_biological_process response_to_stimulus single-organism_process	cell cell_part macromolecular_complex membrane membrane_part organelle organelle_part	binding
gi|37959586	|37959586	cellular_process metabolic_process	cell cell_part organelle	binding catalytic_activity
gi|13877587	|13877587	cellular_component_organization_or_biogenesis cellular_process establishment_of_localization growth localization metabolic_process multi-organism_process response_to_stimulus single-organism_process	cell cell_part membrane organelle organelle_part	transporter_activity
gi|300557525	|300557525	cellular_process metabolic_process response_to_stimulus	cell cell_part organelle	binding catalytic_activity
gi|25811925	|25811925	metabolic_process response_to_stimulus	cell cell_part organelle	antioxidant_activity binding catalytic_activity
gi|295420967	|295420967	biological_regulation cellular_process developmental_process metabolic_process multi-organism_process multicellular_organismal_process positive_regulation_of_biological_process regulation_of_biological_process reproduction reproductive_process response_to_stimulus single-organism_process	cell cell_part extracellular_region organelle organelle_part	binding catalytic_activity
gi|115304532	|115304532	metabolic_process		binding catalytic_activity electron_carrier_activity
gi|217075356	|217075356	cellular_component_organization_or_biogenesis cellular_process establishment_of_localization localization metabolic_process multi-organism_process response_to_stimulus single-organism_process	cell cell_part macromolecular_complex membrane membrane_part organelle organelle_part	binding catalytic_activity transporter_activity
gi|297742010	|297742010	cellular_component_organization_or_biogenesis cellular_process metabolic_process response_to_stimulus single-organism_process	cell cell_part macromolecular_complex organelle
gi|13111657	|13111657	biological_regulation cellular_process developmental_process metabolic_process multicellular_organismal_process positive_regulation_of_biological_process regulation_of_biological_process response_to_stimulus signaling single-organism_process	cell cell_part membrane organelle organelle_part	binding catalytic_activity
gi|222860268	|222860268	biological_regulation cellular_component_organization_or_biogenesis cellular_process developmental_process establishment_of_localization localization metabolic_process multicellular_organismal_process positive_regulation_of_biological_process regulation_of_biological_process single-organism_process	cell cell_part macromolecular_complex membrane membrane_part organelle organelle_part	binding catalytic_activity enzyme_regulator_activity transporter_activity
gi|298573438	|298573438	cellular_process metabolic_process	cell cell_part membrane organelle organelle_part
gi|297743665	|297743665	multi-organism_process	cell cell_part	binding
gi|255646782	|255646782	cellular_process metabolic_process response_to_stimulus	cell cell_part organelle	binding catalytic_activity
gi|227473293	|227473293	biological_regulation cellular_process developmental_process metabolic_process multicellular_organismal_process regulation_of_biological_process reproduction reproductive_process response_to_stimulus signaling single-organism_process	cell cell_part extracellular_region membrane organelle organelle_part	binding catalytic_activity
gi|145326672	|145326672	cellular_process metabolic_process response_to_stimulus	cell cell_part organelle organelle_part	binding catalytic_activity
gi|255627457	|255627457	cellular_process metabolic_process	cell cell_part macromolecular_complex organelle	structural_molecule_activity
gi|12229807	|12229807	biological_regulation cellular_process metabolic_process regulation_of_biological_process response_to_stimulus	cell cell_part organelle	binding catalytic_activity
gi|156634224	|156634224	cellular_process metabolic_process	cell cell_part membrane membrane_part organelle	binding catalytic_activity electron_carrier_activity transporter_activity
gi|55296353	|55296353	establishment_of_localization localization		catalytic_activity
gi|222868326	|222868326	cellular_process metabolic_process response_to_stimulus	cell cell_part extracellular_region membrane organelle organelle_part	binding catalytic_activity
gi|242086170	|242086170	biological_regulation cellular_component_organization_or_biogenesis cellular_process developmental_process establishment_of_localization localization metabolic_process multicellular_organismal_process regulation_of_biological_process reproduction reproductive_process response_to_stimulus single-organism_process	cell cell_part organelle
gi|42794062	|42794062	cellular_process metabolic_process		binding catalytic_activity
gi|311815544	|311815544	biological_regulation cellular_process establishment_of_localization localization metabolic_process regulation_of_biological_process response_to_stimulus signaling single-organism_process	cell cell_part membrane	binding catalytic_activity
gi|71842522	|71842522	cellular_process metabolic_process	cell cell_part extracellular_region membrane organelle organelle_part	binding catalytic_activity
gi|192910862	|192910862	cellular_process metabolic_process response_to_stimulus single-organism_process	cell cell_part macromolecular_complex	catalytic_activity
gi|255574089	|255574089	biological_regulation cellular_component_organization_or_biogenesis cellular_process developmental_process metabolic_process multicellular_organismal_process negative_regulation_of_biological_process regulation_of_biological_process reproduction reproductive_process response_to_stimulus single-organism_process
gi|225457947	|225457947	biological_regulation cellular_component_organization_or_biogenesis cellular_process developmental_process establishment_of_localization immune_system_process localization metabolic_process multi-organism_process multicellular_organismal_process negative_regulation_of_biological_process regulation_of_biological_process response_to_stimulus signaling single-organism_process	cell cell_part extracellular_region membrane organelle organelle_part	binding catalytic_activity
gi|255549601	|255549601	cellular_process metabolic_process response_to_stimulus	cell cell_part extracellular_region membrane organelle organelle_part	binding catalytic_activity
gi|86450874	|86450874		cell cell_part organelle organelle_part
gi|255630929	|255630929	cellular_process metabolic_process	cell cell_part macromolecular_complex membrane membrane-enclosed_lumen organelle organelle_part	structural_molecule_activity
gi|7240474	|7240474	cellular_process metabolic_process	cell cell_part organelle	binding catalytic_activity
gi|257656801	|257656801	metabolic_process response_to_stimulus	cell cell_part membrane organelle	antioxidant_activity binding catalytic_activity
gi|222833148	|222833148	cellular_process metabolic_process		catalytic_activity
gi|75335031	|75335031	cellular_process metabolic_process		binding catalytic_activity electron_carrier_activity transporter_activity
gi|2632088	|2632088	biological_regulation cellular_process metabolic_process negative_regulation_of_biological_process regulation_of_biological_process response_to_stimulus	cell cell_part membrane organelle organelle_part	catalytic_activity structural_molecule_activity
gi|2266947	|2266947	cellular_process metabolic_process	cell cell_part extracellular_region membrane organelle	binding catalytic_activity
gi|22003602	|22003602	cellular_process metabolic_process	cell cell_part organelle	binding catalytic_activity
gi|222844475	|222844475	cellular_process metabolic_process	cell cell_part organelle organelle_part	binding catalytic_activity
gi|302393742	|302393742		cell cell_part macromolecular_complex organelle
gi|300587865	|300587865	cellular_process establishment_of_localization localization metabolic_process response_to_stimulus single-organism_process	cell cell_part membrane membrane_part	binding catalytic_activity transporter_activity
gi|118162023	|118162023	biological_regulation cellular_component_organization_or_biogenesis cellular_process establishment_of_localization localization metabolic_process regulation_of_biological_process response_to_stimulus single-organism_process	cell cell_part organelle	binding catalytic_activity
gi|255640293	|255640293	biological_regulation cellular_process establishment_of_localization immune_system_process localization metabolic_process multi-organism_process negative_regulation_of_biological_process regulation_of_biological_process response_to_stimulus signaling single-organism_process	cell cell_part membrane organelle organelle_part	binding catalytic_activity
gi|183206598	|183206598	cellular_process establishment_of_localization localization metabolic_process single-organism_process	cell cell_part macromolecular_complex membrane membrane_part organelle organelle_part	binding catalytic_activity transporter_activity
gi|227467230	|227467230	metabolic_process response_to_stimulus	cell cell_part organelle organelle_part	catalytic_activity
gi|297831838	|297831838	cellular_component_organization_or_biogenesis cellular_process establishment_of_localization localization metabolic_process response_to_stimulus single-organism_process	cell cell_part organelle	binding catalytic_activity
gi|84468348	|84468348	biological_regulation cellular_component_organization_or_biogenesis cellular_process metabolic_process negative_regulation_of_biological_process regulation_of_biological_process single-organism_process	cell cell_part membrane organelle	binding catalytic_activity
gi|222856419	|222856419	biological_regulation cellular_process metabolic_process negative_regulation_of_biological_process regulation_of_biological_process response_to_stimulus single-organism_process	cell cell_part membrane organelle organelle_part	binding catalytic_activity
gi|633678	|633678	cellular_process developmental_process metabolic_process multicellular_organismal_process reproduction reproductive_process response_to_stimulus single-organism_process	cell cell_part extracellular_region macromolecular_complex organelle organelle_part	catalytic_activity
gi|257644650	|257644650	metabolic_process response_to_stimulus	cell cell_part membrane organelle	antioxidant_activity binding catalytic_activity
gi|255538970	|255538970	biological_regulation cellular_component_organization_or_biogenesis cellular_process developmental_process establishment_of_localization growth localization metabolic_process multicellular_organismal_process regulation_of_biological_process response_to_stimulus single-organism_process	cell cell_junction cell_part extracellular_region membrane organelle organelle_part symplast	binding
gi|21592878	|21592878	biological_regulation cellular_process establishment_of_localization immune_system_process localization metabolic_process multi-organism_process negative_regulation_of_biological_process regulation_of_biological_process response_to_stimulus signaling single-organism_process	cell cell_part membrane organelle organelle_part	binding catalytic_activity
gi|6017812	|6017812	cellular_process establishment_of_localization localization metabolic_process single-organism_process	cell cell_part macromolecular_complex membrane membrane_part organelle organelle_part	binding catalytic_activity transporter_activity
gi|222849412	|222849412	cellular_component_organization_or_biogenesis cellular_process developmental_process metabolic_process multicellular_organismal_process reproduction reproductive_process single-organism_process	cell cell_part organelle organelle_part	binding catalytic_activity
gi|225637964	|225637964	metabolic_process
gi|227481601	|227481601	cellular_process metabolic_process	cell cell_part	catalytic_activity
gi|222861777	|222861777	cellular_process metabolic_process	cell cell_part macromolecular_complex membrane membrane-enclosed_lumen organelle organelle_part	structural_molecule_activity
gi|224105031	|224105031	cellular_process metabolic_process	cell cell_part macromolecular_complex membrane membrane-enclosed_lumen organelle organelle_part	structural_molecule_activity
gi|157887598	|157887598	cellular_process metabolic_process	cell cell_part macromolecular_complex organelle organelle_part	binding structural_molecule_activity
gi|75333114	|75333114	cellular_process establishment_of_localization localization metabolic_process multicellular_organismal_process response_to_stimulus single-organism_process	cell cell_part macromolecular_complex membrane membrane_part organelle organelle_part	catalytic_activity structural_molecule_activity transporter_activity
gi|255538108	|255538108	biological_regulation metabolic_process regulation_of_biological_process	extracellular_region	binding catalytic_activity
gi|257683118	|257683118	metabolic_process		catalytic_activity
gi|255565893	|255565893	metabolic_process		catalytic_activity
gi|297832088	|297832088	cellular_component_organization_or_biogenesis cellular_process establishment_of_localization localization metabolic_process response_to_stimulus single-organism_process	cell cell_part macromolecular_complex membrane	binding
gi|296089605	|296089605	cellular_component_organization_or_biogenesis cellular_process metabolic_process single-organism_process	cell cell_part organelle organelle_part	binding catalytic_activity
gi|217070184	|217070184	cellular_process metabolic_process	cell cell_part organelle organelle_part	binding catalytic_activity
gi|1351856	|1351856	metabolic_process		binding catalytic_activity
gi|309322166	|309322166	cellular_process metabolic_process	cell cell_part macromolecular_complex membrane membrane_part organelle organelle_part
gi|297795245	|297795245	biological_regulation cellular_process establishment_of_localization immune_system_process localization metabolic_process multi-organism_process negative_regulation_of_biological_process regulation_of_biological_process response_to_stimulus signaling single-organism_process	cell cell_part membrane organelle organelle_part	binding catalytic_activity electron_carrier_activity
gi|133793	|133793	cellular_component_organization_or_biogenesis cellular_process metabolic_process single-organism_process	cell cell_junction cell_part macromolecular_complex membrane organelle organelle_part symplast	structural_molecule_activity
gi|255630357	|255630357	single-organism_process		binding catalytic_activity
gi|218192661	|218192661	metabolic_process	cell cell_part organelle organelle_part	catalytic_activity
gi|296088597	|296088597	cellular_component_organization_or_biogenesis cellular_process developmental_process localization metabolic_process multicellular_organismal_process response_to_stimulus single-organism_process	cell cell_part membrane	catalytic_activity
gi|117553550	|117553550	biological_regulation cellular_component_organization_or_biogenesis cellular_process metabolic_process negative_regulation_of_biological_process regulation_of_biological_process single-organism_process	cell cell_part	binding
gi|115765	|115765	cellular_process metabolic_process	cell cell_part membrane organelle organelle_part
gi|225464301	|225464301	cellular_process metabolic_process response_to_stimulus single-organism_process	cell cell_junction cell_part membrane organelle symplast	catalytic_activity
gi|118489712	|118489712	cellular_process metabolic_process	cell cell_part membrane organelle organelle_part	structural_molecule_activity
gi|115463181	|115463181	cellular_process developmental_process growth metabolic_process multicellular_organismal_process response_to_stimulus single-organism_process	cell cell_part membrane organelle	binding catalytic_activity electron_carrier_activity
gi|297734678	|297734678	cellular_component_organization_or_biogenesis cellular_process establishment_of_localization localization metabolic_process response_to_stimulus single-organism_process	cell cell_part organelle	binding catalytic_activity
gi|7706852	|7706852	cellular_process establishment_of_localization localization metabolic_process single-organism_process	cell cell_part macromolecular_complex membrane membrane_part organelle organelle_part	binding catalytic_activity transporter_activity
gi|222852135	|222852135	cellular_process metabolic_process	cell cell_part	binding catalytic_activity
gi|148909628	|148909628	metabolic_process	cell cell_part membrane membrane_part organelle organelle_part	binding catalytic_activity
gi|161788872	|161788872	biological_regulation cellular_process developmental_process establishment_of_localization localization metabolic_process multi-organism_process multicellular_organismal_process regulation_of_biological_process response_to_stimulus single-organism_process	cell cell_part membrane membrane-enclosed_lumen organelle organelle_part	transporter_activity
gi|298204856	|298204856	cellular_process metabolic_process		binding catalytic_activity
gi|6066383	|6066383	biological_regulation cellular_process metabolic_process	cell cell_part macromolecular_complex organelle organelle_part	binding catalytic_activity
gi|242035743	|242035743	metabolic_process	cell cell_part membrane organelle	binding catalytic_activity
gi|225445686	|225445686	biological_regulation cellular_process metabolic_process positive_regulation_of_biological_process regulation_of_biological_process response_to_stimulus signaling single-organism_process	cell cell_part membrane	binding catalytic_activity molecular_transducer_activity
gi|27762607	|27762607	metabolic_process response_to_stimulus	cell cell_part organelle	binding catalytic_activity
gi|296081252	|296081252	cellular_process metabolic_process multi-organism_process response_to_stimulus	cell cell_part membrane organelle
gi|73808794	|73808794	cellular_process metabolic_process	cell cell_part	binding catalytic_activity
gi|255641424	|255641424			binding nutrient_reservoir_activity
gi|296088812	|296088812	cellular_process metabolic_process response_to_stimulus	cell cell_part organelle	binding catalytic_activity
gi|147765367	|147765367	biological_regulation cellular_component_organization_or_biogenesis cellular_process establishment_of_localization localization regulation_of_biological_process response_to_stimulus signaling single-organism_process	cell cell_part membrane membrane_part organelle	binding transporter_activity
gi|297821841	|297821841	cellular_process establishment_of_localization localization metabolic_process single-organism_process	cell cell_part organelle organelle_part	binding catalytic_activity
gi|2641346	|2641346	metabolic_process		binding catalytic_activity
gi|296087561	|296087561	biological_regulation cellular_component_organization_or_biogenesis cellular_process developmental_process metabolic_process multicellular_organismal_process positive_regulation_of_biological_process regulation_of_biological_process single-organism_process	cell cell_part extracellular_region organelle organelle_part	catalytic_activity
gi|148807154	|148807154	cellular_process metabolic_process	cell cell_part macromolecular_complex organelle	structural_molecule_activity
gi|222840651	|222840651	biological_regulation immune_system_process metabolic_process multi-organism_process regulation_of_biological_process response_to_stimulus	cell cell_part membrane organelle	catalytic_activity
gi|257716151	|257716151	biological_regulation cellular_process establishment_of_localization immune_system_process localization metabolic_process multi-organism_process negative_regulation_of_biological_process regulation_of_biological_process response_to_stimulus signaling single-organism_process	cell cell_part extracellular_region membrane organelle	antioxidant_activity binding catalytic_activity
gi|222834544	|222834544	cellular_process developmental_process growth metabolic_process response_to_stimulus single-organism_process	cell cell_part membrane organelle organelle_part	binding catalytic_activity transporter_activity
gi|217072508	|217072508	cellular_component_organization_or_biogenesis cellular_process metabolic_process response_to_stimulus	cell cell_part organelle organelle_part	binding
gi|34588146	|34588146	cellular_process metabolic_process	cell cell_junction cell_part extracellular_region organelle symplast	catalytic_activity
gi|282767712	|282767712	cellular_process establishment_of_localization localization metabolic_process single-organism_process	cell cell_part macromolecular_complex membrane membrane_part organelle	binding catalytic_activity transporter_activity
gi|302765048	|302765048	biological_regulation cellular_process developmental_process establishment_of_localization growth localization metabolic_process multicellular_organismal_process regulation_of_biological_process response_to_stimulus single-organism_process	cell cell_part organelle	antioxidant_activity binding catalytic_activity
gi|255557603	|255557603	cellular_process establishment_of_localization localization single-organism_process	cell cell_part macromolecular_complex membrane membrane_part organelle organelle_part
gi|75140229	|75140229	cellular_process metabolic_process response_to_stimulus	cell cell_part membrane organelle organelle_part	binding catalytic_activity
gi|193506921	|193506921	establishment_of_localization localization single-organism_process	cell cell_part membrane membrane_part organelle	binding catalytic_activity transporter_activity
gi|297742667	|297742667	biological_regulation metabolic_process	cell cell_part membrane-enclosed_lumen organelle organelle_part
gi|85813770	|85813770	cellular_component_organization_or_biogenesis cellular_process metabolic_process single-organism_process	cell cell_part extracellular_region	catalytic_activity
gi|108706890	|108706890	cellular_process metabolic_process	cell cell_part macromolecular_complex organelle organelle_part	structural_molecule_activity
gi|222853177	|222853177	metabolic_process response_to_stimulus	extracellular_region	antioxidant_activity binding catalytic_activity
gi|58761181	|58761181	biological_regulation cellular_component_organization_or_biogenesis cellular_process establishment_of_localization localization metabolic_process multi-organism_process positive_regulation_of_biological_process regulation_of_biological_process response_to_stimulus signaling single-organism_process	cell cell_part macromolecular_complex membrane membrane_part organelle organelle_part	binding
gi|226247013	|226247013	cellular_process metabolic_process		catalytic_activity
gi|255545339	|255545339		cell cell_part membrane organelle	binding catalytic_activity
gi|147770307	|147770307	biological_regulation cellular_process developmental_process immune_system_process metabolic_process multicellular_organismal_process positive_regulation_of_biological_process regulation_of_biological_process reproduction reproductive_process response_to_stimulus signaling single-organism_process	cell cell_part extracellular_region membrane membrane-enclosed_lumen organelle organelle_part	binding
gi|257720004	|257720004	cellular_component_organization_or_biogenesis cellular_process developmental_process metabolic_process multicellular_organismal_process single-organism_process	cell cell_part extracellular_region macromolecular_complex membrane organelle organelle_part	binding
gi|197309656	|197309656	biological_regulation cellular_component_organization_or_biogenesis cellular_process immune_system_process multi-organism_process positive_regulation_of_biological_process regulation_of_biological_process response_to_stimulus signaling single-organism_process	cell cell_part membrane organelle	binding
gi|222841252	|222841252	biological_regulation cellular_process establishment_of_localization localization metabolic_process regulation_of_biological_process response_to_stimulus single-organism_process	cell cell_part membrane organelle organelle_part	catalytic_activity
gi|222860911	|222860911	biological_regulation cellular_process developmental_process growth metabolic_process multicellular_organismal_process regulation_of_biological_process single-organism_process	cell cell_part organelle	catalytic_activity
gi|222867296	|222867296	cellular_component_organization_or_biogenesis cellular_process metabolic_process single-organism_process	cell cell_part membrane organelle organelle_part	structural_molecule_activity
gi|222618650	|222618650	response_to_stimulus	cell cell_part membrane-enclosed_lumen organelle organelle_part	binding catalytic_activity
gi|291047598	|291047598	metabolic_process response_to_stimulus	cell cell_part organelle	binding catalytic_activity
gi|255563186	|255563186	cellular_process developmental_process growth metabolic_process multicellular_organismal_process rhythmic_process single-organism_process	cell cell_part membrane organelle organelle_part	binding catalytic_activity
gi|296082285	|296082285	establishment_of_localization localization	cell cell_part membrane membrane_part organelle organelle_part	binding
gi|242088009	|242088009	biological_regulation cellular_component_organization_or_biogenesis cellular_process developmental_process growth metabolic_process multi-organism_process negative_regulation_of_biological_process regulation_of_biological_process response_to_stimulus single-organism_process	cell cell_part extracellular_region membrane organelle	antioxidant_activity binding catalytic_activity
gi|125556678	|125556678	cellular_component_organization_or_biogenesis cellular_process metabolic_process	cell cell_part organelle organelle_part	binding catalytic_activity
gi|8134569	|8134569	cellular_process metabolic_process response_to_stimulus	cell cell_part extracellular_region membrane organelle organelle_part	binding catalytic_activity
gi|2623298	|2623298	biological_regulation cellular_component_organization_or_biogenesis cellular_process metabolic_process regulation_of_biological_process rhythmic_process single-organism_process	cell cell_part organelle	binding catalytic_activity
gi|297736099	|297736099		cell cell_part organelle
gi|255568888	|255568888	cellular_process establishment_of_localization localization single-organism_process	cell cell_part	transporter_activity
gi|82623421	|82623421	cellular_process metabolic_process	cell cell_part macromolecular_complex membrane membrane-enclosed_lumen organelle organelle_part	structural_molecule_activity
gi|224159	|224159	cellular_process metabolic_process	cell cell_part macromolecular_complex membrane membrane_part organelle organelle_part	binding electron_carrier_activity
gi|110740563	|110740563	cellular_component_organization_or_biogenesis cellular_process metabolic_process response_to_stimulus single-organism_process	cell cell_part organelle	binding catalytic_activity
gi|300587741	|300587741	biological_regulation cellular_process establishment_of_localization localization metabolic_process regulation_of_biological_process response_to_stimulus single-organism_process	cell cell_part membrane membrane_part organelle	binding catalytic_activity transporter_activity
gi|225455175	|225455175	cellular_process developmental_process metabolic_process multicellular_organismal_process single-organism_process	cell cell_part macromolecular_complex membrane membrane-enclosed_lumen organelle organelle_part	binding structural_molecule_activity
gi|255544760	|255544760	cellular_process metabolic_process multi-organism_process response_to_stimulus	cell cell_part membrane organelle organelle_part	binding catalytic_activity
gi|1346735	|1346735	cellular_process metabolic_process response_to_stimulus	cell cell_part extracellular_region membrane organelle organelle_part	binding catalytic_activity
gi|157165901	|157165901	cellular_process establishment_of_localization localization metabolic_process single-organism_process	cell cell_part macromolecular_complex membrane membrane_part organelle organelle_part	binding catalytic_activity transporter_activity
gi|222854515	|222854515	biological_regulation cellular_component_organization_or_biogenesis cellular_process establishment_of_localization localization metabolic_process regulation_of_biological_process single-organism_process	cell cell_part membrane organelle	binding catalytic_activity
gi|75313851	|75313851	cellular_process establishment_of_localization localization multi-organism_process response_to_stimulus single-organism_process	cell cell_part macromolecular_complex membrane organelle organelle_part	binding
gi|302801664	|302801664	cellular_component_organization_or_biogenesis cellular_process developmental_process growth metabolic_process multi-organism_process multicellular_organismal_process reproduction reproductive_process single-organism_process	cell cell_part membrane membrane_part organelle organelle_part	catalytic_activity
gi|192912988	|192912988	cellular_process metabolic_process	cell cell_part macromolecular_complex membrane membrane-enclosed_lumen organelle organelle_part	binding structural_molecule_activity
gi|225434502	|225434502	cellular_process metabolic_process multi-organism_process response_to_stimulus	cell cell_part membrane	binding catalytic_activity
gi|242097138	|242097138	cellular_process metabolic_process	cell cell_part organelle organelle_part	binding catalytic_activity
gi|222851474	|222851474	cellular_process metabolic_process	cell cell_part membrane organelle organelle_part	binding
gi|302760819	|302760819	biological_regulation developmental_process metabolic_process multi-organism_process multicellular_organismal_process regulation_of_biological_process response_to_stimulus single-organism_process	cell cell_part extracellular_region membrane organelle organelle_part	binding enzyme_regulator_activity
gi|302761828	|302761828	biological_regulation cellular_process establishment_of_localization immune_system_process localization metabolic_process multi-organism_process negative_regulation_of_biological_process regulation_of_biological_process response_to_stimulus signaling single-organism_process	cell cell_part extracellular_region membrane organelle organelle_part	binding catalytic_activity
gi|13359453	|13359453	cellular_process developmental_process metabolic_process multicellular_organismal_process single-organism_process	cell cell_part macromolecular_complex membrane membrane-enclosed_lumen organelle organelle_part	binding structural_molecule_activity
gi|222845119	|222845119	metabolic_process multi-organism_process response_to_stimulus	cell cell_part membrane membrane-enclosed_lumen organelle organelle_part	catalytic_activity
gi|222850040	|222850040	metabolic_process		catalytic_activity
gi|225444525	|225444525	biological_regulation cellular_component_organization_or_biogenesis cellular_process developmental_process establishment_of_localization localization metabolic_process multicellular_organismal_process positive_regulation_of_biological_process regulation_of_biological_process single-organism_process	cell cell_part macromolecular_complex membrane membrane_part organelle organelle_part	binding catalytic_activity enzyme_regulator_activity transporter_activity
gi|33347409	|33347409	biological_regulation cellular_component_organization_or_biogenesis cellular_process developmental_process establishment_of_localization localization metabolic_process multicellular_organismal_process negative_regulation_of_biological_process regulation_of_biological_process reproduction reproductive_process response_to_stimulus single-organism_process	cell cell_junction cell_part membrane membrane_part organelle organelle_part symplast	binding
gi|6706412	|6706412	biological_regulation cellular_component_organization_or_biogenesis cellular_process developmental_process establishment_of_localization growth localization metabolic_process multicellular_organismal_process negative_regulation_of_biological_process regulation_of_biological_process single-organism_process	cell cell_part	binding
gi|82570702	|82570702	cellular_process metabolic_process	cell cell_part organelle	binding catalytic_activity
gi|25990360	|25990360	cellular_process metabolic_process multi-organism_process		catalytic_activity
gi|584797	|584797	cellular_process establishment_of_localization localization metabolic_process response_to_stimulus single-organism_process	cell cell_part macromolecular_complex membrane membrane_part membrane-enclosed_lumen organelle organelle_part	binding catalytic_activity transporter_activity
gi|228412	|228412	cellular_component_organization_or_biogenesis cellular_process metabolic_process		binding catalytic_activity
gi|450880	|450880	biological_regulation cellular_process developmental_process metabolic_process multi-organism_process multicellular_organismal_process negative_regulation_of_biological_process regulation_of_biological_process response_to_stimulus single-organism_process	cell cell_junction cell_part extracellular_region macromolecular_complex membrane membrane-enclosed_lumen organelle organelle_part symplast	binding catalytic_activity
gi|224096552	|224096552	biological_regulation cellular_component_organization_or_biogenesis cellular_process establishment_of_localization localization metabolic_process positive_regulation_of_biological_process regulation_of_biological_process response_to_stimulus single-organism_process	cell cell_part macromolecular_complex membrane membrane_part organelle organelle_part
gi|225464069	|225464069	biological_regulation cellular_component_organization_or_biogenesis cellular_process developmental_process establishment_of_localization localization metabolic_process multicellular_organismal_process regulation_of_biological_process reproduction reproductive_process response_to_stimulus signaling single-organism_process	cell cell_part membrane organelle organelle_part	binding catalytic_activity
gi|257665142	|257665142	cellular_process metabolic_process response_to_stimulus	cell cell_part	binding catalytic_activity
gi|229002575	|229002575	cellular_process developmental_process immune_system_process metabolic_process multi-organism_process multicellular_organismal_process response_to_stimulus single-organism_process	cell cell_part organelle	binding catalytic_activity
gi|41367036	|41367036	establishment_of_localization localization single-organism_process	cell cell_part membrane membrane_part organelle	binding catalytic_activity transporter_activity
gi|225459734	|225459734		cell cell_part
gi|147864491	|147864491	cellular_process establishment_of_localization localization single-organism_process	membrane membrane_part	transporter_activity
gi|297734494	|297734494	establishment_of_localization localization	cell cell_part membrane membrane_part organelle organelle_part	binding
gi|17298153	|17298153	biological_regulation metabolic_process regulation_of_biological_process	cell cell_part organelle
gi|73658469	|73658469	cellular_process metabolic_process	cell cell_part macromolecular_complex membrane membrane_part organelle organelle_part	binding electron_carrier_activity
gi|12004115	|12004115	cellular_process establishment_of_localization localization metabolic_process single-organism_process	cell cell_part macromolecular_complex membrane membrane_part organelle organelle_part	binding catalytic_activity transporter_activity
gi|168053363	|168053363	metabolic_process	cell cell_part organelle	catalytic_activity
gi|222844680	|222844680	biological_regulation cellular_process metabolic_process negative_regulation_of_biological_process regulation_of_biological_process response_to_stimulus	cell cell_part organelle	catalytic_activity
gi|296081697	|296081697	metabolic_process	cell cell_part organelle organelle_part	binding catalytic_activity
gi|147801802	|147801802	cellular_process metabolic_process	cell cell_part macromolecular_complex membrane membrane_part organelle organelle_part	binding catalytic_activity electron_carrier_activity
gi|300643494	|300643494	metabolic_process	cell cell_junction cell_part extracellular_region macromolecular_complex membrane organelle organelle_part symplast	binding catalytic_activity
gi|255541698	|255541698	cellular_process metabolic_process	cell cell_part macromolecular_complex membrane organelle organelle_part	structural_molecule_activity
gi|302811211	|302811211	cellular_process metabolic_process	cell cell_part membrane	binding
gi|168056670	|168056670	cellular_process metabolic_process response_to_stimulus	cell cell_part organelle organelle_part	catalytic_activity
gi|255632490	|255632490	cellular_process metabolic_process response_to_stimulus	cell cell_part extracellular_region macromolecular_complex membrane organelle	catalytic_activity
gi|222069948	|222069948	biological_regulation cellular_process metabolic_process regulation_of_biological_process response_to_stimulus signaling single-organism_process	cell cell_junction cell_part membrane organelle organelle_part symplast	binding
gi|297743853	|297743853	cellular_process establishment_of_localization localization metabolic_process single-organism_process	cell cell_part organelle	catalytic_activity
gi|255540021	|255540021	metabolic_process	cell cell_part	binding catalytic_activity
gi|79327811	|79327811	cellular_component_organization_or_biogenesis cellular_process metabolic_process single-organism_process	cell cell_part extracellular_region membrane organelle organelle_part	binding catalytic_activity
gi|49175787	|49175787	cellular_process metabolic_process	cell cell_part macromolecular_complex membrane organelle	binding catalytic_activity
gi|47604692	|47604692	cellular_process metabolic_process	cell cell_part organelle	binding catalytic_activity
gi|147782992	|147782992	response_to_stimulus	cell cell_part membrane organelle organelle_part	catalytic_activity
gi|297734128	|297734128	cellular_process metabolic_process	cell cell_part macromolecular_complex	binding catalytic_activity electron_carrier_activity
gi|259506726	|259506726	cellular_process metabolic_process	cell cell_part extracellular_region membrane organelle	binding catalytic_activity
gi|131573315	|131573315	cellular_component_organization_or_biogenesis cellular_process developmental_process establishment_of_localization localization metabolic_process multicellular_organismal_process response_to_stimulus single-organism_process	cell cell_part macromolecular_complex membrane membrane_part organelle organelle_part	binding catalytic_activity transporter_activity
gi|218203321	|218203321	cellular_process metabolic_process	cell cell_part macromolecular_complex membrane membrane_part organelle organelle_part	binding catalytic_activity electron_carrier_activity
gi|222869473	|222869473	metabolic_process multicellular_organismal_process response_to_stimulus single-organism_process	cell cell_part macromolecular_complex membrane organelle organelle_part	catalytic_activity
gi|209917124	|209917124	metabolic_process response_to_stimulus	cell cell_part extracellular_region membrane organelle organelle_part	binding catalytic_activity
gi|222851752	|222851752	biological_regulation cellular_process metabolic_process negative_regulation_of_biological_process regulation_of_biological_process	cell cell_part organelle	enzyme_regulator_activity
gi|296081618	|296081618	cellular_process establishment_of_localization localization single-organism_process	cell cell_part	binding catalytic_activity
gi|6010228	|6010228	cellular_process metabolic_process		binding catalytic_activity
gi|257712882	|257712882	cellular_component_organization_or_biogenesis cellular_process single-organism_process	cell cell_part membrane membrane_part
gi|224069666	|224069666		cell cell_part organelle organelle_part	binding
gi|255553373	|255553373	cellular_component_organization_or_biogenesis cellular_process establishment_of_localization localization single-organism_process	cell cell_part macromolecular_complex membrane membrane_part organelle organelle_part	binding
gi|222848607	|222848607	biological_regulation cellular_process establishment_of_localization localization metabolic_process single-organism_process	cell cell_part extracellular_region macromolecular_complex membrane membrane_part organelle organelle_part	binding
gi|255635840	|255635840	cellular_process metabolic_process response_to_stimulus	cell cell_part organelle	binding catalytic_activity
gi|255644850	|255644850		cell cell_part macromolecular_complex membrane membrane_part organelle organelle_part	catalytic_activity
gi|297737424	|297737424	response_to_stimulus		binding
gi|217075518	|217075518	cellular_process metabolic_process	cell cell_part macromolecular_complex membrane membrane-enclosed_lumen organelle organelle_part	structural_molecule_activity
gi|50659630	|50659630	cellular_process developmental_process metabolic_process multicellular_organismal_process reproduction reproductive_process single-organism_process	cell cell_part macromolecular_complex membrane-enclosed_lumen organelle organelle_part	structural_molecule_activity
gi|217075709	|217075709	metabolic_process	cell cell_part membrane membrane-enclosed_lumen organelle organelle_part	binding catalytic_activity
gi|92090520	|92090520	cellular_process metabolic_process multi-organism_process		catalytic_activity
gi|1352830	|1352830	cellular_component_organization_or_biogenesis cellular_process developmental_process establishment_of_localization localization metabolic_process multicellular_organismal_process response_to_stimulus single-organism_process	cell cell_part macromolecular_complex membrane membrane_part organelle organelle_part	binding catalytic_activity transporter_activity
gi|129915	|129915	biological_regulation cellular_process establishment_of_localization localization metabolic_process response_to_stimulus single-organism_process	cell cell_part extracellular_region membrane organelle organelle_part	catalytic_activity
gi|194703834	|194703834	cellular_process metabolic_process response_to_stimulus	cell cell_part organelle organelle_part	catalytic_activity
gi|222857940	|222857940	biological_regulation cellular_component_organization_or_biogenesis cellular_process metabolic_process regulation_of_biological_process response_to_stimulus single-organism_process	cell cell_part membrane organelle organelle_part	catalytic_activity
gi|7076784	|7076784	cellular_process metabolic_process response_to_stimulus	cell cell_part organelle	binding catalytic_activity
gi|222859262	|222859262	cellular_process establishment_of_localization localization metabolic_process single-organism_process	cell cell_part macromolecular_complex membrane membrane_part membrane-enclosed_lumen organelle organelle_part	binding catalytic_activity transporter_activity
gi|154811082	|154811082	cellular_component_organization_or_biogenesis cellular_process establishment_of_localization localization metabolic_process single-organism_process	cell cell_part macromolecular_complex membrane membrane_part organelle organelle_part	binding
gi|222858889	|222858889	metabolic_process multicellular_organismal_process response_to_stimulus single-organism_process	cell cell_part macromolecular_complex membrane organelle organelle_part	catalytic_activity
gi|17224768	|17224768	cellular_process establishment_of_localization localization metabolic_process single-organism_process	cell cell_part macromolecular_complex membrane membrane_part organelle organelle_part	binding catalytic_activity transporter_activity
gi|118481291	|118481291	cellular_process developmental_process growth multicellular_organismal_process single-organism_process	cell cell_part membrane organelle	binding
gi|129771094	|129771094	cellular_component_organization_or_biogenesis cellular_process metabolic_process	cell cell_part macromolecular_complex organelle	catalytic_activity structural_molecule_activity
gi|124359402	|124359402	cellular_process metabolic_process response_to_stimulus	cell cell_part organelle	binding catalytic_activity
gi|297741396	|297741396			binding
gi|62319545	|62319545	biological_regulation cellular_component_organization_or_biogenesis cellular_process establishment_of_localization localization metabolic_process positive_regulation_of_biological_process regulation_of_biological_process response_to_stimulus single-organism_process	cell cell_part macromolecular_complex membrane membrane_part organelle organelle_part
gi|227305854	|227305854	biological_regulation cellular_component_organization_or_biogenesis cellular_process developmental_process metabolic_process multicellular_organismal_process positive_regulation_of_biological_process regulation_of_biological_process response_to_stimulus single-organism_process	cell cell_part extracellular_region macromolecular_complex organelle organelle_part	binding catalytic_activity
gi|41352685	|41352685	biological_regulation cellular_component_organization_or_biogenesis cellular_process establishment_of_localization immune_system_process localization metabolic_process regulation_of_biological_process response_to_stimulus single-organism_process	cell cell_part macromolecular_complex membrane organelle organelle_part	catalytic_activity
gi|255556504	|255556504	biological_regulation cellular_process immune_system_process metabolic_process multi-organism_process regulation_of_biological_process response_to_stimulus single-organism_process	cell cell_part extracellular_region macromolecular_complex membrane membrane_part membrane-enclosed_lumen organelle organelle_part	binding catalytic_activity electron_carrier_activity
gi|293334967	|293334967	cellular_process metabolic_process	cell cell_part organelle organelle_part
gi|148906942	|148906942	biological_regulation cellular_component_organization_or_biogenesis cellular_process metabolic_process negative_regulation_of_biological_process regulation_of_biological_process single-organism_process	cell cell_part membrane organelle	binding catalytic_activity
gi|302141701	|302141701			catalytic_activity
gi|296080867	|296080867	biological_regulation cellular_component_organization_or_biogenesis cellular_process developmental_process immune_system_process metabolic_process multi-organism_process multicellular_organismal_process positive_regulation_of_biological_process regulation_of_biological_process response_to_stimulus single-organism_process	cell cell_part extracellular_region organelle organelle_part	catalytic_activity
gi|297738490	|297738490	biological_regulation cellular_component_organization_or_biogenesis cellular_process developmental_process establishment_of_localization growth localization metabolic_process multi-organism_process multicellular_organismal_process positive_regulation_of_biological_process regulation_of_biological_process response_to_stimulus signaling single-organism_process	cell cell_part organelle	binding enzyme_regulator_activity
gi|296089875	|296089875	developmental_process multicellular_organismal_process reproduction reproductive_process single-organism_process	cell cell_part membrane organelle organelle_part	binding catalytic_activity
gi|297742722	|297742722	metabolic_process response_to_stimulus	cell cell_part organelle	catalytic_activity
gi|226509797	|226509797	cellular_process metabolic_process	cell cell_part extracellular_region membrane organelle	catalytic_activity
gi|255639747	|255639747	cellular_process metabolic_process	cell cell_part organelle	binding catalytic_activity
gi|78059502	|78059502	cellular_component_organization_or_biogenesis cellular_process metabolic_process response_to_stimulus single-organism_process	cell cell_part macromolecular_complex organelle
gi|296082851	|296082851	cellular_process metabolic_process response_to_stimulus	cell cell_part membrane organelle	binding catalytic_activity
gi|37574474	|37574474	cellular_process metabolic_process	cell cell_part organelle	binding catalytic_activity
gi|115466224	|115466224	cellular_process metabolic_process response_to_stimulus	cell cell_part membrane organelle organelle_part	binding catalytic_activity
gi|222855447	|222855447	response_to_stimulus	cell cell_part membrane organelle organelle_part	binding
gi|4336756	|4336756	biological_regulation cellular_component_organization_or_biogenesis cellular_process developmental_process establishment_of_localization localization metabolic_process multicellular_organismal_process regulation_of_biological_process reproduction reproductive_process response_to_stimulus single-organism_process	cell cell_part macromolecular_complex membrane organelle organelle_part	antioxidant_activity binding catalytic_activity transporter_activity
gi|113461	|113461	cellular_process establishment_of_localization localization single-organism_process	cell cell_part membrane membrane_part membrane-enclosed_lumen organelle organelle_part	binding transporter_activity
gi|302760535	|302760535	metabolic_process		catalytic_activity
gi|297728737	|297728737			binding catalytic_activity
gi|224284407	|224284407	biological_regulation cellular_component_organization_or_biogenesis cellular_process developmental_process metabolic_process multicellular_organismal_process positive_regulation_of_biological_process regulation_of_biological_process response_to_stimulus single-organism_process	cell cell_part extracellular_region macromolecular_complex organelle organelle_part	binding catalytic_activity
gi|222844299	|222844299	establishment_of_localization localization single-organism_process	cell cell_part membrane organelle organelle_part	transporter_activity
gi|147820070	|147820070	cellular_process developmental_process metabolic_process multicellular_organismal_process reproduction reproductive_process response_to_stimulus single-organism_process	cell cell_part membrane membrane-enclosed_lumen organelle organelle_part	binding catalytic_activity
gi|126633022	|126633022	cellular_process metabolic_process	cell cell_part macromolecular_complex membrane organelle organelle_part	binding
gi|41350265	|41350265	developmental_process metabolic_process multi-organism_process multicellular_organismal_process reproduction reproductive_process response_to_stimulus single-organism_process	cell cell_part extracellular_region membrane organelle organelle_part	antioxidant_activity binding catalytic_activity
gi|7649161	|7649161	cellular_process metabolic_process	cell cell_part membrane organelle	catalytic_activity
gi|255574808	|255574808	cellular_process establishment_of_localization localization single-organism_process	cell cell_junction cell_part macromolecular_complex membrane membrane_part organelle organelle_part symplast	binding structural_molecule_activity
gi|94549022	|94549022	developmental_process multicellular_organismal_process response_to_stimulus single-organism_process		binding
gi|225450619	|225450619	biological_regulation cellular_process metabolic_process regulation_of_biological_process response_to_stimulus single-organism_process	cell cell_part membrane-enclosed_lumen organelle organelle_part	binding catalytic_activity electron_carrier_activity
gi|147795546	|147795546	cellular_process metabolic_process	cell cell_part macromolecular_complex membrane organelle organelle_part	structural_molecule_activity
gi|225447326	|225447326	biological_regulation cellular_process developmental_process establishment_of_localization localization metabolic_process multicellular_organismal_process response_to_stimulus single-organism_process	cell cell_part extracellular_region organelle	antioxidant_activity binding catalytic_activity
gi|225431340	|225431340	biological_regulation cellular_component_organization_or_biogenesis cellular_process developmental_process establishment_of_localization localization metabolic_process response_to_stimulus single-organism_process	cell cell_junction cell_part extracellular_region membrane organelle symplast	binding catalytic_activity
gi|108711426	|108711426	cellular_process metabolic_process	cell cell_part membrane organelle	binding catalytic_activity
gi|255582572	|255582572	establishment_of_localization localization	cell cell_part membrane membrane_part organelle organelle_part
gi|224104697	|224104697	response_to_stimulus	cell cell_part organelle	binding catalytic_activity
gi|182407848	|182407848	cellular_process metabolic_process response_to_stimulus	cell cell_part macromolecular_complex membrane organelle organelle_part	catalytic_activity
gi|255543805	|255543805	cellular_component_organization_or_biogenesis cellular_process developmental_process establishment_of_localization growth localization metabolic_process response_to_stimulus single-organism_process	cell cell_part macromolecular_complex membrane membrane_part organelle organelle_part	catalytic_activity transporter_activity
gi|255552356	|255552356	biological_regulation cellular_process immune_system_process metabolic_process multi-organism_process regulation_of_biological_process response_to_stimulus signaling single-organism_process	cell cell_junction cell_part macromolecular_complex symplast	binding catalytic_activity
gi|15128201	|15128201	cellular_process metabolic_process	cell cell_part macromolecular_complex membrane organelle organelle_part	structural_molecule_activity
gi|297795483	|297795483	biological_regulation cellular_component_organization_or_biogenesis cellular_process metabolic_process negative_regulation_of_biological_process regulation_of_biological_process single-organism_process	cell cell_part organelle
gi|899344	|899344	cellular_process metabolic_process	cell cell_part	binding catalytic_activity
gi|296523718	|296523718	metabolic_process response_to_stimulus	membrane	binding catalytic_activity
gi|255630935	|255630935	cellular_process metabolic_process	cell cell_part organelle organelle_part	binding
gi|296528910	|296528910	biological_regulation cellular_component_organization_or_biogenesis cellular_process establishment_of_localization localization metabolic_process regulation_of_biological_process response_to_stimulus single-organism_process	cell cell_part macromolecular_complex membrane membrane_part organelle organelle_part	binding catalytic_activity
gi|15224406	|15224406	cellular_process metabolic_process response_to_stimulus	cell cell_part extracellular_region membrane organelle	binding catalytic_activity
gi|223973381	|223973381	biological_regulation cellular_process developmental_process metabolic_process multicellular_organismal_process regulation_of_biological_process response_to_stimulus signaling single-organism_process	cell cell_part macromolecular_complex membrane organelle	binding catalytic_activity
gi|255564914	|255564914	cellular_process metabolic_process response_to_stimulus	cell cell_part	binding catalytic_activity
gi|118485031	|118485031	biological_regulation cellular_process establishment_of_localization localization metabolic_process regulation_of_biological_process response_to_stimulus single-organism_process	cell cell_part extracellular_region membrane organelle organelle_part	catalytic_activity electron_carrier_activity
gi|124359737	|124359737	biological_regulation cellular_component_organization_or_biogenesis cellular_process establishment_of_localization immune_system_process localization metabolic_process multi-organism_process negative_regulation_of_biological_process regulation_of_biological_process response_to_stimulus single-organism_process	cell cell_part macromolecular_complex organelle organelle_part	binding catalytic_activity
gi|118488288	|118488288	cellular_process metabolic_process response_to_stimulus	cell cell_part macromolecular_complex membrane membrane-enclosed_lumen organelle organelle_part	binding structural_molecule_activity
gi|116786512	|116786512		cell cell_part membrane organelle
gi|257721506	|257721506	cellular_process metabolic_process response_to_stimulus single-organism_process	cell cell_junction cell_part extracellular_region membrane membrane-enclosed_lumen organelle organelle_part symplast	binding catalytic_activity
gi|313183807	|313183807	cellular_process establishment_of_localization localization metabolic_process single-organism_process	cell cell_part macromolecular_complex membrane membrane_part organelle organelle_part	binding catalytic_activity transporter_activity
gi|83699284	|83699284	cellular_process metabolic_process	cell cell_part	binding catalytic_activity
gi|224338	|224338	establishment_of_localization localization metabolic_process single-organism_process		binding transporter_activity
gi|242087243	|242087243	biological_regulation cellular_component_organization_or_biogenesis cellular_process developmental_process establishment_of_localization growth localization multi-organism_process multicellular_organismal_process regulation_of_biological_process reproduction reproductive_process response_to_stimulus signaling single-organism_process	cell cell_part membrane organelle	binding
gi|255641471	|255641471	metabolic_process response_to_stimulus	cell cell_part extracellular_region membrane organelle organelle_part	binding catalytic_activity
gi|225446946	|225446946	metabolic_process response_to_stimulus	cell cell_part membrane organelle organelle_part	binding catalytic_activity
gi|168034003	|168034003	cellular_process establishment_of_localization localization metabolic_process response_to_stimulus single-organism_process	cell cell_part extracellular_region organelle organelle_part	binding catalytic_activity
gi|257689825	|257689825	biological_regulation cellular_process metabolic_process negative_regulation_of_biological_process regulation_of_biological_process response_to_stimulus	cell cell_part membrane organelle	binding catalytic_activity
gi|225464997	|225464997	biological_regulation cellular_component_organization_or_biogenesis cellular_process developmental_process establishment_of_localization immune_system_process localization metabolic_process multi-organism_process multicellular_organismal_process reproduction reproductive_process response_to_stimulus single-organism_process	cell cell_part extracellular_region membrane organelle organelle_part	catalytic_activity
gi|222840887	|222840887	cellular_process metabolic_process multi-organism_process response_to_stimulus	cell cell_part extracellular_region membrane organelle organelle_part	binding catalytic_activity
gi|300636279	|300636279	cellular_process metabolic_process response_to_stimulus	cell cell_part membrane	binding catalytic_activity
gi|124360646	|124360646	cellular_component_organization_or_biogenesis cellular_process establishment_of_localization localization metabolic_process response_to_stimulus	cell cell_part macromolecular_complex membrane membrane_part organelle organelle_part	transporter_activity
