# Supplementary material for: Isobaric Tags for Relative and Absolute Quantitation (iTRAQ)-Based Comparative Proteome Analysis of the Response of Ramie under Drought Stress
Source: Int J Mol Sci. 2016 Sep 27;17(10):1607. doi: 10.3390/ijms17101607 (PMC5085640; doi:10.3390/ijms17101607)
Supplement: Supplementary file 1 [file ijms-17-01607-s001.zip › ijms-134229-Supplementary Materials/Table S2.xlsx]

## Sheet: all_Leaf.cog2protein
Code	Functional-Categories	Protein-Number	Proteins
A	RNA processing and modification	2	comp71329_c0_seq3_75,COG5181	comp83330_c0_seq1_81,COG5161
B	Chromatin structure and dynamics	3	comp579_c0_seq1_3,COG2036	comp46152_c0_seq2_5,COG2036	comp22219_c0_seq1_3,COG5262
C	Energy production and conversion	93	comp65910_c0_seq1_29,COG0055	comp80191_c0_seq1_11,COG0055	comp83983_c0_seq1_50,COG0584	comp81392_c0_seq1_13,COG0039	comp60257_c0_seq1_26,COG0526	comp86202_c0_seq1_31,COG2352	comp24629_c0_seq1_10,COG0039	comp27906_c0_seq2_22,COG0039	comp80911_c0_seq1_14,COG1012	comp77124_c0_seq3_21,COG0224	comp81040_c0_seq1_13,COG0277	comp595_c0_seq1_8,COG0039	comp66731_c0_seq1_18,COG0712	comp68890_c0_seq1_11,COG1062	comp81986_c1_seq4_13,COG1304	comp38935_c0_seq1_54,COG1269	comp81942_c1_seq1_29,COG1249	comp85174_c2_seq2_7,COG0022	comp38425_c0_seq1_8,COG0074	comp78366_c0_seq1_57,COG2352	comp78897_c0_seq1_9,COG1902	comp67723_c0_seq1_15,COG0712	comp84406_c0_seq2_21,COG0508	comp85714_c0_seq2_54,COG1048	comp53956_c0_seq1_19,COG3808	comp60515_c0_seq1_5,COG0508	comp67581_c0_seq1_38,COG0281	comp78404_c0_seq2_46,COG1251	comp65378_c0_seq1_20,COG1390	comp39650_c0_seq2_17,COG1052	comp43868_c0_seq1_34,COG0056	comp808318_c0_seq1_1,COG0056	comp74924_c0_seq1_39,COG1034	comp77207_c0_seq2_22,COG0526	comp69419_c0_seq1_43,COG1053	comp27554_c0_seq1_10,COG1156	comp74764_c0_seq1_8,COG0723	comp36511_c0_seq1_37,COG0277	comp80334_c0_seq1_31,COG0281	comp79950_c0_seq1_11,COG0045	comp69198_c0_seq1_10,COG0473	comp69198_c0_seq1_10,COG0538	comp1067541_c0_seq1_4,COG0045	comp84757_c0_seq2_44,COG0281	comp68857_c0_seq1_9,COG0526	comp77466_c0_seq2_35,COG1012	comp73717_c0_seq1_12,COG1902
D	Cell cycle control, cell division, chromosome partitioning	5	comp84134_c0_seq2_39,COG0206	comp75494_c0_seq1_11,COG5184	comp77328_c0_seq1_25,COG5184	comp42763_c0_seq1_6,COG5126	comp82021_c0_seq1_9,COG0489
E	Amino acid transport and metabolism	69	comp78800_c0_seq1_23,COG0031	comp84436_c0_seq2_31,COG0031	comp81710_c0_seq1_33,COG0069	comp84571_c0_seq2_47,COG0620	comp81293_c0_seq1_14,COG0112	comp61727_c0_seq1_10,COG0367	comp81828_c0_seq1_59,COG1003	comp77041_c0_seq1_27,COG0334	comp74861_c0_seq1_30,COG2939	comp35411_c0_seq1_11,COG0436	comp86110_c0_seq1_27,COG0174	comp86777_c0_seq1_4,COG0076	comp76590_c0_seq1_31,COG0174	comp42964_c0_seq1_18,COG0347	comp79941_c0_seq1_7,COG0136	comp79654_c0_seq1_12,COG1448	comp80998_c0_seq1_11,COG0174	comp77894_c1_seq1_8,COG0404	comp76640_c0_seq1_11,COG0436	comp55013_c0_seq1_6,COG0346	comp56765_c0_seq1_25,COG0031	comp78105_c0_seq1_34,COG0129	comp69198_c0_seq1_10,COG0473	comp81028_c1_seq1_129,COG0069	comp71613_c0_seq9_42,COG0308	comp73788_c0_seq1_24,COG0066	comp75992_c0_seq1_29,COG1448	comp79478_c0_seq1_12,COG2939	comp61251_c0_seq1_18,COG0339	comp82215_c1_seq1_16,COG2303	comp60404_c0_seq1_4,COG0346	comp85993_c0_seq1_8,COG0421	comp77182_c1_seq1_9,COG0075	comp80797_c0_seq1_38,COG0107	comp80797_c0_seq1_38,COG0118	comp82417_c0_seq2_7,COG0002	comp68734_c0_seq1_25,COG2957	comp62855_c0_seq2_18,COG1506	comp79178_c0_seq1_12,COG0440	comp76258_c0_seq1_16,COG0308	comp87765_c0_seq1_12,COG0112	comp79153_c0_seq3_97,COG1506	comp63366_c0_seq1_21,COG1932	comp82639_c1_seq1_45,COG0367	comp63933_c0_seq1_38,COG0624	comp86594_c0_seq1_4,COG0076	comp84760_c0_seq1_56,COG0260
F	Nucleotide transport and metabolism	16	comp79366_c0_seq1_27,COG0572	comp73128_c0_seq1_16,COG0105	comp73929_c1_seq1_10,COG0105	comp75855_c0_seq1_11,COG0034	comp79676_c1_seq1_14,COG2759	comp57820_c0_seq1_15,COG0563	comp83363_c0_seq2_32,COG0015	comp79137_c0_seq2_9,COG0503	comp27750_c0_seq2_7,COG0537	comp74959_c0_seq1_7,COG0775	comp76723_c0_seq1_17,COG0775	comp78373_c0_seq21_23,COG0505	comp25997_c0_seq2_6,COG0105	comp30581_c0_seq1_7,COG0150	comp82467_c0_seq2_28,COG0284	comp82467_c0_seq2_28,COG0461
G	Carbohydrate transport and metabolism	106	comp48511_c0_seq2_4,COG1850	comp420243_c0_seq1_2,COG1850	comp67924_c0_seq1_11,COG0057	comp75310_c0_seq1_31,COG0158	comp68764_c0_seq1_34,COG0057	comp85102_c1_seq1_6,COG3325	comp61993_c0_seq1_28,COG0696	comp84469_c0_seq2_29,COG2723	comp39370_c0_seq1_9,COG3588	comp79217_c0_seq1_7,COG0524	comp85946_c0_seq1_15,COG0297	comp85015_c0_seq1_55,COG1501	comp72139_c0_seq1_27,COG3588	comp79849_c0_seq1_31,COG0448	comp83131_c3_seq1_40,COG0021	comp76238_c0_seq1_10,COG0524	comp71397_c0_seq2_16,COG0126	comp74948_c0_seq1_11,COG0451	comp74948_c0_seq1_11,COG0702	comp77656_c0_seq1_12,COG1621	comp54730_c0_seq1_9,COG0524	comp54150_c0_seq1_13,COG4284	comp76062_c0_seq1_10,COG2723	comp84247_c0_seq2_11,COG0033	comp84247_c0_seq2_11,COG1109	comp84678_c0_seq1_18,COG1640	comp79756_c0_seq1_20,COG0451	comp75074_c0_seq1_16,COG0469	comp59412_c0_seq1_14,COG0153	comp80282_c0_seq5_29,COG3588	comp66481_c0_seq1_10,COG0451	comp27505_c0_seq1_22,COG0574	comp73866_c0_seq1_50,COG0296	comp75934_c0_seq1_8,COG0362	comp55270_c0_seq1_24,COG0057	comp76748_c0_seq1_11,COG0362	comp83553_c0_seq1_18,COG1472	comp84395_c0_seq5_21,COG1472	comp69477_c0_seq1_17,COG5026	comp70030_c0_seq1_14,COG5026	comp77070_c0_seq1_28,COG0158	comp86214_c1_seq1_27,COG0702	comp78105_c0_seq1_34,COG0129	comp65743_c0_seq1_50,COG0448	comp43126_c0_seq1_26,COG0058	comp79891_c1_seq1_11,COG5371	comp97032_c0_seq1_10,COG3525
H	Coenzyme transport and metabolism	23	comp68637_c0_seq1_20,COG0408	comp77476_c0_seq1_10,COG0001	comp66652_c0_seq1_13,COG0407	comp85659_c2_seq2_9,COG0113	comp39650_c0_seq2_17,COG1052	comp87096_c0_seq1_10,COG1239	comp87877_c0_seq1_27,COG0142	comp79161_c0_seq1_7,COG0181	comp78543_c0_seq2_24,COG0543	comp82623_c0_seq1_21,COG1052	comp79420_c1_seq1_11,COG1232	comp82936_c0_seq2_26,COG0192	comp85100_c0_seq1_46,COG0807	comp85100_c0_seq1_46,COG0108	comp100725_c0_seq1_20,COG0499	comp63366_c0_seq1_21,COG1932	comp62305_c0_seq1_19,COG2227	comp60478_c1_seq2_7,COG0192	comp74466_c0_seq1_37,COG0059	comp76647_c0_seq1_11,COG0111	comp81976_c0_seq1_59,COG0476	comp81478_c0_seq1_19,COG1240	comp81478_c0_seq1_19,COG1239
I	Lipid transport and metabolism	35	comp79005_c0_seq2_27,COG3675	comp94943_c0_seq1_28,COG3240	comp62296_c0_seq1_20,COG0657	comp74178_c0_seq1_10,COG3240	comp41097_c0_seq1_24,COG0657	comp75231_c0_seq3_25,COG1443	comp78556_c0_seq2_24,COG3240	comp83708_c0_seq1_13,COG0318	comp83708_c0_seq1_13,COG0365	comp64043_c0_seq1_10,COG0304	comp80254_c0_seq2_9,COG0777	comp75375_c0_seq1_53,COG1502	comp82626_c0_seq11_4,COG1028	comp72734_c0_seq1_24,COG0511	comp39320_c0_seq1_11,COG4281	comp79687_c0_seq2_8,COG1947	comp90042_c0_seq1_32,COG3240	comp85136_c0_seq3_9,COG0332	comp80791_c1_seq1_6,COG1024	comp72730_c0_seq1_7,COG3240	comp75806_c0_seq1_22,COG1028	comp69273_c0_seq1_5,COG1028	comp54784_c0_seq1_5,COG1022	comp84648_c0_seq1_15,COG1022	comp226741_c0_seq1_49,COG1657	comp80343_c0_seq1_40,COG3407	comp80611_c0_seq1_11,COG1024	comp73105_c0_seq1_52,COG0821	comp77047_c0_seq1_39,COG3425	comp68786_c0_seq1_6,COG0764	comp83973_c1_seq1_25,COG3240	comp74478_c0_seq1_11,COG0183	comp17236_c0_seq1_5,COG0623	comp73939_c0_seq2_5,COG1657	comp69261_c0_seq1_9,COG1028
J	Translation, ribosomal structure and biogenesis	87	comp74779_c0_seq1_8,COG1471	comp193829_c0_seq1_7,COG2053	comp69315_c0_seq1_5,COG2058	comp73838_c0_seq1_7,COG0256	comp81258_c0_seq1_16,COG0049	comp57363_c0_seq1_26,COG0048	comp79696_c0_seq1_14,COG0513	comp38825_c0_seq1_23,COG0094	comp95557_c0_seq1_18,COG3719	comp87079_c0_seq1_7,COG0197	comp74440_c0_seq2_19,COG4352	comp82049_c0_seq4_37,COG5256	comp44858_c0_seq1_3,COG0513	comp87246_c0_seq1_15,COG0423	comp61744_c0_seq1_2,COG0522	comp85183_c1_seq2_20,COG0480	comp79772_c0_seq1_6,COG0442	comp73550_c0_seq1_18,COG0097	comp79318_c0_seq1_18,COG0513	comp88294_c0_seq1_3,COG0098	comp77578_c0_seq1_48,COG0480	comp74641_c0_seq1_18,COG3719	comp59492_c0_seq1_5,COG1727	comp78960_c0_seq2_21,COG0200	comp83554_c0_seq1_15,COG2174	comp76534_c0_seq1_39,COG0513	comp79888_c0_seq1_34,COG0264	comp88463_c0_seq1_15,COG0087	comp67362_c0_seq2_35,COG0012	comp85817_c0_seq1_14,COG2163	comp14968_c0_seq1_2,COG1998	comp80004_c0_seq1_14,COG1727	comp81709_c8_seq2_23,COG5154	comp307494_c0_seq1_7,COG0244	comp61885_c0_seq1_3,COG0100	comp75531_c0_seq1_9,COG0154	comp84472_c0_seq1_34,COG1190	comp79008_c0_seq1_16,COG2092	comp78880_c0_seq2_12,COG0103	comp54158_c0_seq1_19,COG0092	comp27660_c0_seq1_9,COG2125	comp67458_c0_seq1_34,COG0052	comp30213_c0_seq1_6,COG4901	comp59510_c0_seq1_44,COG0441	comp69108_c0_seq1_5,COG0087	comp3964_c0_seq1_8,COG1208	comp85558_c1_seq1_38,COG1503
K	Transcription	21	comp79696_c0_seq1_14,COG0513	comp44858_c0_seq1_3,COG0513	comp82370_c1_seq1_53,COG0515	comp79318_c0_seq1_18,COG0513	comp76534_c0_seq1_39,COG0513	comp87390_c0_seq1_16,COG0515	comp83339_c0_seq1_71,COG0515	comp81292_c0_seq1_47,COG0515	comp3564_c0_seq1_4,COG0515	comp79451_c0_seq1_32,COG2183	comp30171_c0_seq1_75,COG0515	comp4999_c0_seq2_7,COG0515	comp81975_c0_seq1_9,COG0515	comp86350_c0_seq1_31,COG0515	comp69269_c0_seq1_28,COG0515	comp85227_c0_seq1_25,COG0515	comp81516_c0_seq1_88,COG0515	comp41264_c0_seq2_47,COG0513	comp83636_c0_seq1_22,COG0515	comp79780_c0_seq2_8,COG0378	comp77110_c1_seq1_13,COG0515
L	Replication, recombination and repair	20	comp83698_c0_seq1_24,COG1525	comp79696_c0_seq1_14,COG0513	comp44858_c0_seq1_3,COG0513	comp82370_c1_seq1_53,COG0515	comp79318_c0_seq1_18,COG0513	comp76534_c0_seq1_39,COG0513	comp87390_c0_seq1_16,COG0515	comp83339_c0_seq1_71,COG0515	comp81292_c0_seq1_47,COG0515	comp3564_c0_seq1_4,COG0515	comp30171_c0_seq1_75,COG0515	comp4999_c0_seq2_7,COG0515	comp81975_c0_seq1_9,COG0515	comp86350_c0_seq1_31,COG0515	comp69269_c0_seq1_28,COG0515	comp85227_c0_seq1_25,COG0515	comp81516_c0_seq1_88,COG0515	comp41264_c0_seq2_47,COG0513	comp83636_c0_seq1_22,COG0515	comp77110_c1_seq1_13,COG0515
M	Cell wall/membrane/envelope biogenesis	37	comp74948_c0_seq1_11,COG0451	comp74948_c0_seq1_11,COG1087	comp74948_c0_seq1_11,COG0702	comp79756_c0_seq1_20,COG0451	comp79756_c0_seq1_20,COG1088	comp66481_c0_seq1_10,COG0451	comp86214_c1_seq1_27,COG0702	comp83282_c0_seq1_48,COG0438	comp62697_c0_seq1_11,COG2335	comp84461_c0_seq2_14,COG5434	comp83103_c0_seq1_9,COG0451	comp84109_c0_seq3_22,COG0702	comp58864_c0_seq3_37,COG0451	comp58864_c0_seq3_37,COG1087	comp58864_c0_seq3_37,COG1088	comp58864_c0_seq3_37,COG1089	comp75827_c0_seq1_24,COG0702	comp75827_c0_seq1_24,COG0451	comp3964_c0_seq1_8,COG1208	comp71080_c0_seq1_13,COG4775	comp81383_c1_seq1_49,COG0438	comp69265_c0_seq1_25,COG0451	comp76498_c0_seq1_30,COG5434	comp77138_c0_seq1_7,COG1212	comp80861_c1_seq1_21,COG0451	comp83808_c1_seq1_28,COG0702	comp75806_c0_seq1_22,COG3967	comp73899_c0_seq1_70,COG0438	comp78666_c0_seq2_17,COG5434	comp81211_c1_seq1_22,COG0451	comp78777_c0_seq1_8,COG0702	comp793931_c0_seq1_5,COG3040	comp83596_c0_seq1_34,COG0702	comp56811_c0_seq1_34,COG0750	comp66008_c0_seq2_29,COG0702	comp84004_c1_seq1_11,COG3511	comp80222_c0_seq1_44,COG0702
O	Posttranslational modification, protein turnover, chaperones	117	comp85205_c1_seq2_38,COG0443	comp80231_c0_seq1_36,COG0443	comp68905_c0_seq1_28,COG0464	comp78163_c0_seq2_15,COG0459	comp60257_c0_seq1_26,COG0526	comp69405_c0_seq1_30,COG0459	comp85850_c0_seq1_10,COG0652	comp74090_c1_seq2_21,COG1404	comp57641_c0_seq1_16,COG1404	comp75492_c0_seq1_19,COG0625	comp100621_c0_seq1_34,COG1404	comp65814_c0_seq1_5,COG0638	comp73284_c0_seq1_39,COG0443	comp94547_c0_seq1_18,COG0542	comp86860_c0_seq1_36,COG0459	comp71328_c0_seq1_15,COG0465	comp59960_c0_seq1_28,COG0740	comp68626_c0_seq1_20,COG0464	comp65893_c0_seq1_7,COG1225	comp83028_c0_seq3_45,COG1404	comp62405_c0_seq1_8,COG0234	comp68994_c0_seq1_7,COG1222	comp80255_c0_seq1_18,COG0465	comp57307_c0_seq1_5,COG0229	comp64951_c0_seq5_24,COG0576	comp84102_c0_seq1_26,COG4870	comp77207_c0_seq2_22,COG0526	comp84128_c0_seq1_69,COG5116	comp84128_c0_seq1_69,COG5110	comp62796_c0_seq1_41,COG0443	comp28330_c0_seq1_9,COG0544	comp76355_c0_seq1_9,COG0386	comp70681_c0_seq1_8,COG0396	comp80377_c0_seq1_15,COG0625	comp68857_c0_seq1_9,COG0526	comp68857_c0_seq1_9,COG3118	comp73632_c0_seq1_44,COG5272	comp79891_c1_seq1_11,COG5371	comp14968_c0_seq1_2,COG5272	comp80508_c0_seq1_27,COG0265	comp86908_c0_seq1_12,COG0459	comp79132_c0_seq1_27,COG0386	comp66935_c0_seq1_18,COG0545	comp74944_c0_seq3_26,COG5272	comp73761_c0_seq1_17,COG0638	comp39361_c0_seq1_24,COG4870	comp82374_c0_seq1_12,COG0526
P	Inorganic ion transport and metabolism	25	comp74570_c1_seq1_58,COG0474	comp73216_c0_seq3_24,COG0474	comp66790_c0_seq1_6,COG0369	comp74009_c0_seq1_24,COG0753	comp82272_c0_seq1_18,COG0155	comp82903_c0_seq2_29,COG0474	comp79321_c1_seq1_10,COG2608	comp77503_c0_seq1_13,COG0471	comp68888_c0_seq1_35,COG0753	comp76707_c0_seq1_17,COG0474	comp75440_c0_seq1_23,COG1528	comp81586_c0_seq1_12,COG0471	comp68253_c0_seq1_11,COG0605	comp84526_c0_seq1_27,COG0475	comp77272_c0_seq6_8,COG0155	comp78543_c0_seq2_24,COG4097	comp81777_c0_seq1_30,COG0748	comp84153_c0_seq1_11,COG0474	comp89159_c0_seq1_45,COG1226	comp74054_c0_seq1_9,COG0288	comp81455_c1_seq2_27,COG0369	comp73377_c0_seq2_4,COG1513	comp88117_c0_seq1_7,COG2032	comp75517_c0_seq3_49,COG0607	comp55048_c0_seq1_10,COG0376
Q	Secondary metabolites biosynthesis, transport and catabolism	17	comp76574_c0_seq1_42,COG2132	comp79866_c0_seq1_10,COG2124	comp81554_c0_seq2_33,COG2132	comp83708_c0_seq1_13,COG0318	comp64043_c0_seq1_10,COG0304	comp83322_c0_seq1_14,COG2124	comp79680_c0_seq1_31,COG2124	comp82626_c0_seq11_4,COG1028	comp81091_c0_seq2_41,COG2132	comp88320_c0_seq1_11,COG3733	comp85136_c0_seq3_9,COG3424	comp75806_c0_seq1_22,COG1028	comp69273_c0_seq1_5,COG1028	comp72877_c0_seq2_39,COG2132	comp82646_c0_seq1_8,COG3670	comp85448_c0_seq9_38,COG2124	comp69261_c0_seq1_9,COG1028
R	General function prediction only	120	comp85102_c1_seq1_6,COG3858	comp76446_c0_seq1_26,COG3979	comp61201_c0_seq1_8,COG4447	comp75278_c0_seq1_18,COG0724	comp94943_c0_seq1_28,COG3240	comp63641_c0_seq1_7,COG3979	comp75522_c0_seq1_29,COG3491	comp71251_c0_seq1_7,COG0655	comp39152_c0_seq1_22,COG0655	comp74178_c0_seq1_10,COG3240	comp86093_c0_seq1_8,COG3979	comp78931_c0_seq1_52,COG4240	comp51778_c0_seq1_8,COG1100	comp78556_c0_seq2_24,COG3240	comp72035_c0_seq1_23,COG1512	comp64684_c0_seq1_8,COG0517	comp82370_c1_seq1_53,COG0515	comp80618_c0_seq1_18,COG0663	comp84406_c0_seq2_21,COG0457	comp72228_c0_seq1_43,COG0612	comp80862_c1_seq1_22,COG1310	comp78404_c0_seq2_46,COG0446	comp39650_c0_seq2_17,COG1052	comp75393_c0_seq1_10,COG0612	comp87096_c0_seq1_10,COG0714	comp74924_c0_seq1_39,COG3383	comp84936_c0_seq1_28,COG1409	comp76373_c0_seq1_11,COG0724	comp81162_c0_seq1_30,COG1473	comp73892_c0_seq1_23,COG0724	comp82815_c0_seq1_20,COG1011	comp82815_c0_seq1_20,COG0637	comp82815_c0_seq1_20,COG0546	comp27719_c0_seq1_10,COG3491	comp82626_c0_seq11_4,COG1028	comp58892_c0_seq1_6,COG0724	comp82623_c0_seq1_21,COG1052	comp66961_c0_seq6_24,COG0724	comp41704_c0_seq2_8,COG0496	comp87390_c0_seq1_16,COG0515	comp84188_c2_seq1_4,COG0724	comp81483_c0_seq3_30,COG0724	comp62812_c0_seq1_24,COG0446	comp73833_c0_seq1_10,COG2319	comp65557_c0_seq1_14,COG0724	comp77844_c0_seq1_37,COG0517	comp76413_c0_seq1_45,COG5354
S	Function unknown	14	comp84502_c1_seq1_8,COG4886	comp81064_c1_seq1_52,COG5594	comp72686_c0_seq1_8,COG1357	comp82370_c1_seq1_53,COG4886	comp39790_c0_seq1_19,COG4886	comp73197_c0_seq1_14,COG2340	comp69528_c0_seq1_26,COG3752	comp75032_c0_seq1_8,COG1357	comp68775_c0_seq1_36,COG5202	comp928453_c0_seq1_27,COG5093	comp77436_c0_seq1_8,COG4886	comp85227_c0_seq1_25,COG4886	comp58025_c0_seq1_4,COG2340	comp27682_c0_seq1_15,COG2340
T	Signal transduction mechanisms	21	comp64684_c0_seq1_8,COG2905	comp82370_c1_seq1_53,COG0515	comp76653_c1_seq1_12,COG5040	comp72085_c0_seq1_31,COG0631	comp87390_c0_seq1_16,COG0515	comp77844_c0_seq1_37,COG2905	comp83339_c0_seq1_71,COG0515	comp81292_c0_seq1_47,COG0515	comp3564_c0_seq1_4,COG0515	comp30171_c0_seq1_75,COG0515	comp59227_c0_seq1_16,COG5040	comp4999_c0_seq2_7,COG0515	comp81975_c0_seq1_9,COG0515	comp86350_c0_seq1_31,COG0515	comp42763_c0_seq1_6,COG5126	comp79610_c0_seq1_64,COG0639	comp69269_c0_seq1_28,COG0515	comp85227_c0_seq1_25,COG0515	comp81516_c0_seq1_88,COG0515	comp83636_c0_seq1_22,COG0515	comp77110_c1_seq1_13,COG0515
U	Intracellular trafficking, secretion, and vesicular transport	15	comp84804_c0_seq2_42,COG0823	comp59960_c0_seq1_28,COG0740	comp71920_c0_seq1_20,COG5215	comp63067_c0_seq1_21,COG5143	comp62855_c0_seq2_18,COG0823	comp58441_c0_seq1_53,COG5096	comp79307_c0_seq7_12,COG5064	comp73252_c0_seq1_9,COG0740	comp78765_c0_seq1_14,COG0823	comp61129_c0_seq1_8,COG0740	comp84354_c2_seq1_6,COG0740	comp77231_c0_seq1_50,COG5158	comp72497_c1_seq1_3,COG5143	comp58431_c0_seq1_35,COG0706	comp20614_c0_seq1_8,COG5052
V	Defense mechanisms	6	comp83645_c0_seq1_28,COG1131	comp83645_c0_seq1_28,COG1136	comp83645_c0_seq1_28,COG1132	comp71850_c0_seq2_20,COG3440	comp82095_c0_seq2_12,COG1131	comp82095_c0_seq2_12,COG1136
Z	Cytoskeleton	10	comp79621_c0_seq3_29,COG5023	comp75494_c0_seq1_11,COG5184	comp56339_c0_seq1_3,COG5277	comp82035_c0_seq1_35,COG5277	comp60460_c0_seq1_15,COG5023	comp77328_c0_seq1_25,COG5184	comp68136_c0_seq1_6,COG5023	comp25705_c0_seq1_4,COG5023	comp42763_c0_seq1_6,COG5126	comp53934_c0_seq1_4,COG5277
[truncated: 73 more columns]

## Sheet: all_Root.cog2protein
Code	Functional-Categories	Protein-Number	Proteins
B	Chromatin structure and dynamics	3	comp74350_c0_seq1_11,COG5262	comp11616_c0_seq1_2,COG2036	comp579_c0_seq1_3,COG2036
C	Energy production and conversion	76	comp65910_c0_seq1_29,COG0055	comp80191_c0_seq1_11,COG0055	comp77857_c0_seq7_9,COG0055	comp83983_c0_seq1_50,COG0584	comp54370_c0_seq1_4,COG1062	comp78941_c0_seq1_26,COG1062	comp81040_c0_seq1_13,COG0277	comp81392_c0_seq1_13,COG0039	comp595_c0_seq1_8,COG0039	comp27554_c0_seq1_10,COG1156	comp78366_c0_seq1_57,COG2352	comp27906_c0_seq2_22,COG0039	comp24629_c0_seq1_10,COG0039	comp85174_c2_seq2_7,COG0022	comp78897_c0_seq1_9,COG1902	comp81986_c1_seq4_13,COG1304	comp12115_c0_seq1_9,COG0055	comp67723_c0_seq1_15,COG0712	comp53956_c0_seq1_19,COG3808	comp38425_c0_seq1_8,COG0074	comp84757_c0_seq2_44,COG0281	comp69419_c0_seq1_43,COG1053	comp75095_c0_seq1_23,COG0604	comp51310_c1_seq1_10,COG0056	comp84930_c1_seq1_51,COG0508	comp808318_c0_seq1_1,COG0056	comp73026_c0_seq1_6,COG1071	comp85889_c0_seq1_44,COG0526	comp38935_c0_seq1_54,COG1269	comp68890_c0_seq1_11,COG1062	comp86202_c0_seq1_31,COG2352	comp77124_c0_seq3_21,COG0224	comp85542_c0_seq2_27,COG0372	comp69198_c0_seq1_10,COG0473	comp69198_c0_seq1_10,COG0538	comp76367_c0_seq1_25,COG0567	comp75496_c0_seq1_21,COG0667	comp80781_c1_seq1_35,COG0277	comp81942_c1_seq1_29,COG1249	comp79303_c0_seq1_5,COG0526	comp68857_c0_seq1_9,COG0526	comp68016_c0_seq1_16,COG0074	comp68016_c0_seq1_16,COG0372	comp67581_c0_seq1_38,COG0281	comp78258_c0_seq1_5,COG0604	comp81430_c0_seq4_14,COG0056	comp79950_c0_seq1_11,COG0045
D	Cell cycle control, cell division, chromosome partitioning	2	comp75494_c0_seq1_11,COG5184	comp42763_c0_seq1_6,COG5126
E	Amino acid transport and metabolism	60	comp81167_c0_seq2_12,COG2303	comp84571_c0_seq2_47,COG0620	comp75992_c0_seq1_29,COG1448	comp78800_c0_seq1_23,COG0031	comp76640_c0_seq1_11,COG0436	comp79941_c0_seq1_7,COG0136	comp47911_c0_seq1_28,COG0014	comp77894_c1_seq1_8,COG0404	comp63933_c0_seq1_38,COG0624	comp60404_c0_seq1_4,COG0346	comp84285_c0_seq2_11,COG0028	comp84285_c0_seq2_11,COG3962	comp81710_c0_seq1_33,COG0069	comp80998_c0_seq1_11,COG0174	comp79388_c1_seq1_7,COG0436	comp78330_c0_seq2_46,COG0160	comp78330_c0_seq2_46,COG4992	comp69198_c0_seq1_10,COG0473	comp55013_c0_seq1_6,COG0346	comp79654_c0_seq1_12,COG1448	comp42964_c0_seq1_18,COG0347	comp82215_c1_seq1_16,COG2303	comp77041_c0_seq1_27,COG0334	comp86110_c0_seq1_27,COG0174	comp86777_c0_seq1_4,COG0076	comp72016_c0_seq2_7,COG1506	comp81293_c0_seq1_14,COG0112	comp85993_c0_seq1_8,COG0421	comp84807_c0_seq1_10,COG0112	comp77182_c1_seq1_9,COG0075	comp83368_c0_seq1_31,COG2939	comp61251_c0_seq1_18,COG0339	comp77053_c0_seq1_7,COG3200	comp39387_c0_seq2_49,COG0028	comp14026_c0_seq1_2,COG1362	comp86594_c0_seq1_4,COG0076	comp69316_c0_seq1_10,COG0367	comp81828_c0_seq1_59,COG1003	comp73788_c0_seq1_24,COG0066	comp79178_c0_seq1_12,COG0440	comp60113_c0_seq1_43,COG0685	comp78105_c0_seq1_34,COG0129	comp83597_c0_seq1_56,COG0436	comp78989_c0_seq1_11,COG2939	comp70846_c0_seq1_11,COG0002	comp74685_c0_seq1_14,COG0509	comp85924_c0_seq1_17,COG0436
F	Nucleotide transport and metabolism	11	comp30581_c0_seq1_7,COG0150	comp79366_c0_seq1_27,COG0572	comp73128_c0_seq1_16,COG0105	comp73929_c1_seq1_10,COG0105	comp79676_c1_seq1_14,COG2759	comp57820_c0_seq1_15,COG0563	comp82467_c0_seq2_28,COG0284	comp82467_c0_seq2_28,COG0461	comp79838_c0_seq1_8,COG0167	comp27750_c0_seq2_7,COG0537	comp1470507_c0_seq1_2,COG0516
G	Carbohydrate transport and metabolism	79	comp48511_c0_seq2_4,COG1850	comp72139_c0_seq1_27,COG3588	comp83131_c3_seq1_40,COG0021	comp858059_c0_seq1_3,COG1850	comp68764_c0_seq1_34,COG0057	comp85102_c1_seq1_6,COG3325	comp79217_c0_seq1_7,COG0524	comp76238_c0_seq1_10,COG0524	comp67924_c0_seq1_11,COG0057	comp61993_c0_seq1_28,COG0696	comp83522_c1_seq2_10,COG0364	comp54150_c0_seq1_13,COG4284	comp420243_c0_seq1_2,COG1850	comp69477_c0_seq1_17,COG5026	comp79849_c0_seq1_31,COG0448	comp55270_c0_seq1_24,COG0057	comp84285_c0_seq2_11,COG3961	comp39370_c0_seq1_9,COG3588	comp84247_c0_seq2_11,COG0033	comp84247_c0_seq2_11,COG1109	comp71397_c0_seq2_16,COG0126	comp64376_c0_seq1_27,COG0126	comp75310_c0_seq1_31,COG0158	comp76062_c0_seq1_10,COG2723	comp66481_c0_seq1_10,COG0451	comp83413_c0_seq2_18,COG4677	comp85015_c0_seq1_55,COG1501	comp69390_c0_seq1_6,COG0469	comp75074_c0_seq1_16,COG0469	comp86214_c1_seq1_27,COG0702	comp76748_c0_seq1_11,COG0362	comp44971_c0_seq1_6,COG1850	comp59412_c0_seq1_14,COG0153	comp40646_c0_seq1_35,COG0033	comp40646_c0_seq1_35,COG1109	comp38992_c0_seq1_11,COG0469	comp79756_c0_seq1_20,COG0451	comp81346_c0_seq2_16,COG0383	comp76007_c0_seq1_37,COG3469	comp79976_c0_seq1_5,COG0149	comp67591_c0_seq1_8,COG5026	comp97032_c0_seq1_10,COG3525	comp84953_c0_seq1_57,COG2133	comp84395_c0_seq5_21,COG1472	comp218414_c0_seq1_3,COG1850	comp83609_c0_seq1_17,COG0698	comp83073_c0_seq2_32,COG2723
H	Coenzyme transport and metabolism	20	comp68637_c0_seq1_20,COG0408	comp84285_c0_seq2_11,COG3961	comp84285_c0_seq2_11,COG0028	comp81976_c0_seq1_59,COG0476	comp78330_c0_seq2_46,COG0161	comp100725_c0_seq1_20,COG0499	comp80940_c0_seq2_13,COG1232	comp82936_c0_seq2_26,COG0192	comp39387_c0_seq2_49,COG3961	comp39387_c0_seq2_49,COG0028	comp87096_c0_seq1_10,COG1239	comp77476_c0_seq1_10,COG0001	comp78756_c1_seq1_14,COG0161	comp74466_c0_seq1_37,COG0059	comp85771_c0_seq2_35,COG1120	comp85100_c0_seq1_46,COG0807	comp85100_c0_seq1_46,COG0108	comp82623_c0_seq1_21,COG1052	comp72445_c3_seq1_13,COG0142	comp76647_c0_seq1_11,COG0111
I	Lipid transport and metabolism	24	comp80580_c0_seq1_27,COG0183	comp94943_c0_seq1_28,COG3240	comp75231_c0_seq3_25,COG1443	comp84948_c1_seq3_13,COG1443	comp64043_c0_seq1_10,COG0304	comp47102_c0_seq1_17,COG0657	comp63032_c0_seq1_18,COG1502	comp75375_c0_seq1_53,COG1502	comp67046_c0_seq1_68,COG1022	comp83832_c0_seq3_8,COG1028	comp85136_c0_seq3_9,COG0332	comp80343_c0_seq1_40,COG3407	comp68786_c0_seq1_6,COG0764	comp82626_c0_seq11_4,COG1028	comp91197_c0_seq1_28,COG0439	comp77047_c0_seq1_39,COG3425	comp69273_c0_seq1_5,COG1028	comp73939_c0_seq2_5,COG1657	comp80254_c0_seq2_9,COG0777	comp17236_c0_seq1_5,COG0623	comp84796_c0_seq15_17,COG1960	comp84028_c1_seq1_11,COG1250	comp79005_c0_seq2_27,COG3675	comp83973_c1_seq1_25,COG3240
J	Translation, ribosomal structure and biogenesis	64	comp69315_c0_seq1_5,COG2058	comp73838_c0_seq1_7,COG0256	comp54158_c0_seq1_19,COG0092	comp57363_c0_seq1_26,COG0048	comp921376_c0_seq1_9,COG0050	comp82049_c0_seq4_37,COG5256	comp59492_c0_seq1_5,COG1727	comp80004_c0_seq1_14,COG1727	comp74440_c0_seq2_19,COG4352	comp74779_c0_seq1_8,COG1471	comp193829_c0_seq1_7,COG2053	comp77578_c0_seq1_48,COG0480	comp73677_c0_seq1_6,COG0093	comp85817_c0_seq1_14,COG2163	comp56065_c0_seq1_6,COG0097	comp78880_c0_seq2_12,COG0103	comp81258_c0_seq1_16,COG0049	comp81164_c0_seq1_30,COG0017	comp79696_c0_seq1_14,COG0513	comp44685_c0_seq1_3,COG5256	comp44858_c0_seq1_3,COG0513	comp76534_c0_seq1_39,COG0513	comp61885_c0_seq1_3,COG0100	comp81709_c8_seq2_23,COG5154	comp67617_c0_seq2_5,COG2238	comp64165_c0_seq1_42,COG0008	comp61744_c0_seq1_2,COG0522	comp74003_c0_seq2_32,COG0024	comp307494_c0_seq1_7,COG0244	comp87246_c0_seq1_15,COG0423	comp30213_c0_seq1_6,COG4901	comp27660_c0_seq1_9,COG2125	comp61847_c1_seq1_4,COG0096	comp88463_c0_seq1_15,COG0087	comp27573_c0_seq1_19,COG0231	comp71894_c0_seq2_21,COG0091	comp35936_c0_seq1_9,COG0184	comp80590_c0_seq1_33,COG0513	comp73675_c0_seq1_11,COG0072	comp54338_c0_seq1_8,COG1841	comp67458_c0_seq1_34,COG0052	comp83022_c0_seq2_19,COG0098	comp68184_c0_seq2_7,COG0222	comp80002_c0_seq1_11,COG4352	comp65878_c2_seq4_20,COG0013	comp351645_c0_seq1_4,COG5256	comp41538_c0_seq1_30,COG1208
K	Transcription	15	comp79696_c0_seq1_14,COG0513	comp44858_c0_seq1_3,COG0513	comp76534_c0_seq1_39,COG0513	comp77452_c0_seq3_68,COG0515	comp87390_c0_seq1_16,COG0515	comp85163_c0_seq3_69,COG0515	comp80590_c0_seq1_33,COG0513	comp81516_c0_seq1_88,COG0515	comp78347_c0_seq1_25,COG0515	comp30171_c0_seq1_75,COG0515	comp83339_c0_seq1_71,COG0515	comp83613_c0_seq1_55,COG0515	comp347627_c0_seq1_16,COG0515	comp73830_c0_seq1_37,COG0515	comp81318_c0_seq2_10,COG0515
L	Replication, recombination and repair	17	comp83698_c0_seq1_24,COG1525	comp79696_c0_seq1_14,COG0513	comp44858_c0_seq1_3,COG0513	comp76534_c0_seq1_39,COG0513	comp84948_c1_seq3_13,COG0494	comp77452_c0_seq3_68,COG0515	comp87390_c0_seq1_16,COG0515	comp85163_c0_seq3_69,COG0515	comp80590_c0_seq1_33,COG0513	comp81516_c0_seq1_88,COG0515	comp78347_c0_seq1_25,COG0515	comp30171_c0_seq1_75,COG0515	comp83339_c0_seq1_71,COG0515	comp83613_c0_seq1_55,COG0515	comp347627_c0_seq1_16,COG0515	comp73830_c0_seq1_37,COG0515	comp81318_c0_seq2_10,COG0515
M	Cell wall/membrane/envelope biogenesis	19	comp83282_c0_seq1_48,COG0438	comp84004_c1_seq1_11,COG3511	comp66481_c0_seq1_10,COG0451	comp86214_c1_seq1_27,COG0702	comp84555_c0_seq2_43,COG5498	comp79756_c0_seq1_20,COG0451	comp79756_c0_seq1_20,COG1088	comp67056_c0_seq2_16,COG5434	comp84461_c0_seq2_14,COG5434	comp74948_c0_seq1_11,COG0451	comp74948_c0_seq1_11,COG1087	comp74948_c0_seq1_11,COG0702	comp76498_c0_seq1_30,COG5434	comp84109_c0_seq3_22,COG0702	comp40099_c0_seq1_65,COG0438	comp41538_c0_seq1_30,COG1208	comp793931_c0_seq1_5,COG3040	comp82121_c0_seq1_25,COG0744	comp82121_c0_seq1_25,COG5009
O	Posttranslational modification, protein turnover, chaperones	79	comp85205_c1_seq2_38,COG0443	comp78163_c0_seq2_15,COG0459	comp80231_c0_seq1_36,COG0443	comp85850_c0_seq1_10,COG0652	comp75492_c0_seq1_19,COG0625	comp62796_c0_seq1_41,COG0443	comp73284_c0_seq1_39,COG0443	comp74944_c0_seq3_26,COG5272	comp84128_c0_seq1_69,COG5116	comp84128_c0_seq1_69,COG5110	comp65814_c0_seq1_5,COG0638	comp69405_c0_seq1_30,COG0459	comp62405_c0_seq1_8,COG0234	comp85199_c0_seq1_53,COG1404	comp68905_c0_seq1_28,COG0464	comp85822_c1_seq1_16,COG5061	comp76549_c0_seq1_40,COG0326	comp85889_c0_seq1_44,COG0526	comp74090_c1_seq2_21,COG1404	comp57307_c0_seq1_5,COG0229	comp68153_c0_seq1_6,COG0694	comp2659_c0_seq1_10,COG0443	comp6_c0_seq1_10,COG0443	comp74570_c0_seq1_9,COG0625	comp66210_c1_seq1_41,COG0545	comp69824_c0_seq1_13,COG1404	comp86908_c0_seq1_12,COG0459	comp65285_c0_seq1_19,COG0638	comp68626_c0_seq1_20,COG0464	comp79303_c0_seq1_5,COG0526	comp68857_c0_seq1_9,COG0526	comp68857_c0_seq1_9,COG3118	comp85251_c0_seq7_82,COG1404	comp86339_c0_seq1_28,COG0526	comp57641_c0_seq1_16,COG1404	comp79183_c0_seq1_62,COG0443	comp94547_c0_seq1_18,COG0542	comp73309_c0_seq1_11,COG5272	comp86860_c0_seq1_36,COG0459	comp79615_c0_seq1_26,COG0459	comp83043_c1_seq1_33,COG4870	comp75610_c0_seq1_17,COG0652	comp76835_c0_seq1_6,COG0492	comp100621_c0_seq1_34,COG1404	comp89896_c0_seq1_15,COG0652	comp83423_c1_seq5_25,COG0265	comp71822_c0_seq1_32,COG0459
P	Inorganic ion transport and metabolism	19	comp74009_c0_seq1_24,COG0753	comp82272_c0_seq1_18,COG0155	comp76707_c0_seq1_17,COG0474	comp79321_c1_seq1_10,COG2608	comp66790_c0_seq1_6,COG0369	comp81455_c1_seq2_27,COG0369	comp77503_c0_seq1_13,COG0471	comp81586_c0_seq1_12,COG0471	comp79594_c0_seq2_41,COG4638	comp84153_c0_seq1_11,COG0474	comp83579_c0_seq1_15,COG0288	comp99679_c0_seq1_13,COG0471	comp73216_c0_seq3_24,COG0474	comp68253_c0_seq1_11,COG0605	comp77272_c0_seq6_8,COG0155	comp74054_c0_seq1_9,COG0288	comp351645_c0_seq1_4,COG2895	comp85771_c0_seq2_35,COG1118	comp85771_c0_seq2_35,COG1120
Q	Secondary metabolites biosynthesis, transport and catabolism	16	comp64043_c0_seq1_10,COG0304	comp80682_c0_seq1_27,COG3648	comp78255_c0_seq1_37,COG2132	comp60380_c0_seq2_8,COG2132	comp83832_c0_seq3_8,COG1028	comp85136_c0_seq3_9,COG3424	comp76574_c0_seq1_42,COG2132	comp81091_c0_seq2_41,COG2132	comp62931_c0_seq2_10,COG4577	comp82626_c0_seq11_4,COG1028	comp76173_c0_seq1_27,COG0412	comp72877_c0_seq2_39,COG2132	comp79866_c0_seq1_10,COG2124	comp69273_c0_seq1_5,COG1028	comp920947_c0_seq1_4,COG4577	comp63172_c0_seq1_31,COG2124
R	General function prediction only	81	comp85102_c1_seq1_6,COG3858	comp76446_c0_seq1_26,COG3979	comp39152_c0_seq1_22,COG0655	comp71251_c0_seq1_7,COG0655	comp94943_c0_seq1_28,COG3240	comp84285_c0_seq2_11,COG3961	comp75095_c0_seq1_23,COG0604	comp68862_c0_seq2_5,COG1100	comp68862_c0_seq2_5,COG2229	comp67659_c0_seq1_38,COG0724	comp84948_c1_seq3_13,COG0494	comp77844_c0_seq1_37,COG0517	comp77452_c0_seq3_68,COG0515	comp85560_c0_seq3_26,COG2319	comp78863_c0_seq1_57,COG0699	comp63641_c0_seq1_7,COG3979	comp75393_c0_seq1_10,COG0612	comp61201_c0_seq1_8,COG4447	comp87390_c0_seq1_16,COG0515	comp39010_c0_seq1_17,COG2319	comp85163_c0_seq3_69,COG0515	comp76413_c0_seq1_45,COG5354	comp41704_c0_seq2_8,COG0496	comp78258_c0_seq1_5,COG2130	comp78258_c0_seq1_5,COG0604	comp77404_c1_seq1_13,COG1473	comp79594_c0_seq2_41,COG4638	comp83832_c0_seq3_8,COG1028	comp66961_c0_seq6_24,COG0724	comp58892_c0_seq1_6,COG0724	comp80701_c0_seq2_7,COG2319	comp81483_c0_seq3_30,COG0724	comp80940_c0_seq2_13,COG2907	comp66131_c0_seq3_34,COG1409	comp71325_c0_seq1_9,COG2070	comp80618_c0_seq1_18,COG0663	comp76200_c0_seq2_31,COG3491	comp72441_c0_seq1_55,COG0699	comp39387_c0_seq2_49,COG3961	comp76373_c0_seq1_11,COG0724	comp82626_c0_seq11_4,COG1028	comp74924_c0_seq1_39,COG3383	comp75235_c0_seq2_16,COG4122	comp75278_c0_seq1_18,COG0724	comp81516_c0_seq1_88,COG0515	comp87096_c0_seq1_10,COG0714	comp1575789_c0_seq1_7,COG2319
S	Function unknown	18	comp84502_c1_seq1_8,COG4886	comp77452_c0_seq3_68,COG4886	comp73197_c0_seq1_14,COG2340	comp83284_c0_seq1_46,COG4886	comp80940_c0_seq2_13,COG3349	comp7447_c0_seq1_13,COG3861	comp81543_c0_seq1_25,COG4886	comp38905_c0_seq1_7,COG4886	comp58025_c0_seq1_4,COG2340	comp81064_c1_seq1_52,COG5594	comp78347_c0_seq1_25,COG4886	comp63845_c0_seq1_30,COG4886	comp83613_c0_seq1_55,COG4886	comp27682_c0_seq1_15,COG2340	comp69528_c0_seq1_26,COG3752	comp73830_c0_seq1_37,COG4886	comp81183_c0_seq4_28,COG4886	comp805202_c0_seq1_10,COG5592
T	Signal transduction mechanisms	19	comp77844_c0_seq1_37,COG2905	comp77452_c0_seq3_68,COG0515	comp87390_c0_seq1_16,COG0515	comp76653_c1_seq1_12,COG5040	comp73467_c0_seq1_11,COG0631	comp85163_c0_seq3_69,COG0515	comp81516_c0_seq1_88,COG0515	comp74828_c0_seq1_22,COG0631	comp78347_c0_seq1_25,COG0515	comp30171_c0_seq1_75,COG0515	comp64684_c0_seq1_8,COG2905	comp83339_c0_seq1_71,COG0515	comp83613_c0_seq1_55,COG0515	comp27703_c0_seq1_9,COG5170	comp347627_c0_seq1_16,COG0515	comp79610_c0_seq1_64,COG0639	comp42763_c0_seq1_6,COG5126	comp73830_c0_seq1_37,COG0515	comp81318_c0_seq2_10,COG0515
U	Intracellular trafficking, secretion, and vesicular transport	7	comp58441_c0_seq1_53,COG5096	comp85822_c1_seq1_16,COG5061	comp84804_c0_seq2_42,COG0823	comp63067_c0_seq1_21,COG5143	comp27805_c0_seq1_45,COG5347	comp71920_c0_seq1_20,COG5215	comp84829_c0_seq1_63,COG5215
V	Defense mechanisms	3	comp83513_c0_seq1_53,COG1131	comp85771_c0_seq2_35,COG1131	comp85771_c0_seq2_35,COG1136
Z	Cytoskeleton	8	comp79621_c0_seq3_29,COG5023	comp75494_c0_seq1_11,COG5184	comp82035_c0_seq1_35,COG5277	comp56339_c0_seq1_3,COG5277	comp53934_c0_seq1_4,COG5277	comp7125_c0_seq1_8,COG5023	comp42763_c0_seq1_6,COG5126	comp80235_c0_seq1_17,COG5022
[truncated: 34 more columns]

## Sheet: Leaf proteins_vs_nr.blast
Query	Q_Length	Subject	S_Length	Score_Bits	Score	E_Value	Identities	Identities	Identities	Positives	Positives	Positives	Gaps	Gaps	Gaps
comp71329_c0_seq3_75	1281	ref|XP_010094129.1| hypothetical protein L484_017166 [Morus notabilis]gb|EXB55262.1| hypothetical protein L484_017166 [Morus notabilis]	1270	2256	5845	0	1136	1273	0.89	1162	1273	0.91	6	1273	0
comp83330_c0_seq1_81	1467	ref|XP_007220310.1| hypothetical protein PRUPE_ppa000211mg [Prunus persica]gb|EMJ21509.1| hypothetical protein PRUPE_ppa000211mg [Prunus persica]	1459	2421	6275	0	1166	1468	0.79	1269	1468	0.86	20	1468	0.01
comp579_c0_seq1_3	87	ref|XP_002179286.1| histone H4 isoform 1b [Phaeodactylum tricornutum CCAP 1055/1]ref|XP_002179505.1| histone H4 isoform 1a [Phaeodactylum tricornutum CCAP 1055/1]ref|XP_002288196.1| histone H4 [Thalassiosira pseudonana CCMP1335]ref|XP_002295724.1| predicted protein [Thalassiosira pseudonana CCMP1335]ref|XP_002295814.1| predicted protein [Thalassiosira pseudonana CCMP1335]ref|XP_002296170.1| histo…	103	132	332	8e-39	66	66	1	66	66	1
comp46152_c0_seq2_5	115	ref|XP_004076117.1| PREDICTED: histone H3.3-like, partial [Oryzias latipes]	119	232	592	1e-77	115	115	1	115	115	1
comp22219_c0_seq1_3	130	ref|XP_008487247.1| PREDICTED: histone H2A.V [Diaphorina citri]	128	207	528	1e-67	103	103	1	103	103	1
comp65910_c0_seq1_29	510	gb|AIX11669.1| ATP synthase CF1 beta subunit (chloroplast) [Morus mongolica]	498	994	2571	0	491	498	0.98	495	498	0.99
comp80191_c0_seq1_11	582	ref|XP_004299555.1| PREDICTED: ATP synthase subunit beta, mitochondrial-like [Fragariavesca subsp. vesca]	551	921	2380	0	455	470	0.96	462	470	0.98
comp83983_c0_seq1_50	771	ref|XP_010099974.1| putative glycerophosphoryl diester phosphodiesterase 2 [Morusnotabilis]gb|EXB81079.1| putative glycerophosphoryl diester phosphodiesterase 2 [Morusnotabilis]	748	1068	2761	0	521	727	0.71	603	727	0.82	22	727	0.03
comp81392_c0_seq1_13	420	ref|XP_010091525.1| Malate dehydrogenase [Morus notabilis]gb|EXB44695.1| Malate dehydrogenase [Morus notabilis]	396	663	1710	0	335	408	0.82	351	408	0.86	16	408	0.03
comp60257_c0_seq1_26	528	ref|XP_010095405.1| Protein disulfide-isomerase [Morus notabilis]gb|EXB60097.1| Protein disulfide-isomerase [Morus notabilis]	502	771	1991	0	376	493	0.76	425	493	0.86	3	493	0
comp86202_c0_seq1_31	1010	ref|XP_010104390.1| Phosphoenolpyruvate carboxylase 2 [Morus notabilis]gb|EXC00235.1| Phosphoenolpyruvate carboxylase 2 [Morus notabilis]	967	1844	4777	0	892	967	0.92	915	967	0.94	1	967	0
comp24629_c0_seq1_10	275	gb|ABK24331.1| unknown [Picea sitchensis]	410	410	1053	1e-141	207	277	0.74	233	277	0.84	4	277	0.01
comp27906_c0_seq2_22	305	emb|CBI29427.3| unnamed protein product [Vitis vinifera]	356	443	1140	1e-154	222	271	0.81	233	271	0.85	1	271	0
comp80911_c0_seq1_14	571	ref|XP_010101190.1| Aldehyde dehydrogenase family 2 member [Morus notabilis]gb|EXB87864.1| Aldehyde dehydrogenase family 2 member [Morus notabilis]	546	957	2475	0	454	505	0.89	482	505	0.95
comp77124_c0_seq3_21	415	ref|XP_007026083.1| ATPase, F1 complex, gamma subunit protein [Theobroma cacao]gb|EOY28705.1| ATPase, F1 complex, gamma subunit protein [Theobroma cacao]	375	602	1551	0	293	375	0.78	318	375	0.84	1	375	0
comp81040_c0_seq1_13	571	ref|XP_010098534.1| Reticuline oxidase-like protein [Morus notabilis]gb|EXB75194.1| Reticuline oxidase-like protein [Morus notabilis]	547	789	2038	0	366	525	0.69	434	525	0.82	2	525	0
comp595_c0_seq1_8	337	ref|XP_002954828.1| malate dehydrogenase [Volvox carteri f. nagariensis]gb|EFJ44027.1| malate dehydrogenase [Volvox carteri f. nagariensis]	342	379	973	1e-128	201	332	0.6	228	332	0.68	4	332	0.01
comp66731_c0_seq1_18	324	ref|XP_010094830.1| ATP synthase delta chain [Morus notabilis]gb|EXB57359.1| ATP synthase delta chain [Morus notabilis]	247	283	725	1e-92	152	246	0.61	173	246	0.7	1	246	0
comp68890_c0_seq1_11	395	ref|XP_007199930.1| hypothetical protein PRUPE_ppa006317mg [Prunus persica]gb|EMJ01129.1| hypothetical protein PRUPE_ppa006317mg [Prunus persica]	417	709	1831	0	341	376	0.9	354	376	0.94
comp81986_c1_seq4_13	447	gb|ACD93720.1| glycolate oxidase [Mikania micrantha]	369	713	1840	0	344	369	0.93	360	369	0.97
comp38935_c0_seq1_54	828	ref|XP_010096180.1| Vacuolar proton translocating ATPase 100 kDa subunit [Morusnotabilis]gb|EXB63575.1| Vacuolar proton translocating ATPase 100 kDa subunit [Morusnotabilis]	814	1420	3676	0	685	814	0.84	727	814	0.89
comp81942_c1_seq1_29	522	ref|XP_008368565.1| PREDICTED: dihydrolipoyl dehydrogenase, mitochondrial [Malusdomestica]	509	892	2304	0	441	514	0.85	469	514	0.91	11	514	0.02
comp85174_c2_seq2_7	371	ref|XP_008459895.1| PREDICTED: pyruvate dehydrogenase E1 component subunit beta-1,mitochondrial [Cucumis melo]ref|XP_008459896.1| PREDICTED: pyruvate dehydrogenase E1 component subunit beta-1,mitochondrial [Cucumis melo]	372	694	1792	0	338	371	0.91	357	371	0.96	3	371	0
comp38425_c0_seq1_8	365	ref|XP_009355925.1| PREDICTED: succinyl-CoA ligase [ADP-forming] subunit alpha-2,mitochondrial [Pyrus x bretschneideri]	334	573	1477	0	289	340	0.85	298	340	0.87	6	340	0.01
comp78366_c0_seq1_57	967	ref|XP_010108239.1| Phosphoenolpyruvate carboxylase, housekeeping isozyme [Morusnotabilis]gb|EXC18479.1| Phosphoenolpyruvate carboxylase, housekeeping isozyme [Morusnotabilis]	1376	1852	4798	0	887	964	0.92	920	964	0.95
comp78897_c0_seq1_9	383	ref|XP_010100109.1| Putative 12-oxophytodienoate reductase 11 [Morus notabilis]gb|EXB81492.1| Putative 12-oxophytodienoate reductase 11 [Morus notabilis]	372	682	1759	0	319	370	0.86	345	370	0.93	1	370	0
comp67723_c0_seq1_15	270	ref|XP_008231281.1| PREDICTED: ATP synthase subunit O, mitochondrial [Prunus mume]	251	354	908	1e-121	170	251	0.67	211	251	0.84
comp84406_c0_seq2_21	401	ref|XP_010094864.1| Uncharacterized protein ycf37 [Morus notabilis]gb|EXB57393.1| Uncharacterized protein ycf37 [Morus notabilis]	349	383	983	1e-129	191	233	0.81	207	233	0.88
comp85714_c0_seq2_54	977	ref|XP_004144496.1| PREDICTED: aconitate hydratase, cytoplasmic-like [Cucumis sativus]gb|KGN43521.1| hypothetical protein Csa_7G043630 [Cucumis sativus]	989	1785	4622	0	853	925	0.92	883	925	0.95
comp53956_c0_seq1_19	391	gb|ADK36629.1| vacuolar H+-pyrophosphatase [Dunaliella viridis]	762	511	1315	1e-173	255	378	0.67	295	378	0.78	1	378	0
comp60515_c0_seq1_5	312	ref|XP_008243215.1| PREDICTED: dihydrolipoyllysine-residue acetyltransferase component3 of pyruvate dehydrogenase complex, mitochondrial[Prunus mume]	466	474	1220	1e-165	233	302	0.77	253	302	0.83
comp67581_c0_seq1_38	610	ref|XP_002511819.1| malic enzyme, putative [Ricinus communis]gb|EEF50488.1| malic enzyme, putative [Ricinus communis]	602	1019	2634	0	484	584	0.82	520	584	0.89
comp78404_c0_seq2_46	509	ref|XP_010089047.1| Monodehydroascorbate reductase [Morus notabilis]gb|EXB37294.1| Monodehydroascorbate reductase [Morus notabilis]	491	831	2146	0	420	495	0.84	448	495	0.9	13	495	0.02
comp65378_c0_seq1_20	267	ref|XP_002274995.1| PREDICTED: V-type proton ATPase subunit E [Vitis vinifera]emb|CBI34442.3| unnamed protein product [Vitis vinifera]	230	381	979	1e-132	190	230	0.82	203	230	0.88
comp39650_c0_seq2_17	397	ref|XP_004287066.1| PREDICTED: glycerate dehydrogenase-like [Fragaria vesca subsp.vesca]	386	711	1834	0	339	380	0.89	354	380	0.93
comp43868_c0_seq1_34	555	gb|AAU84946.1| putative mitochondrial ATP synthase alpha subunit precursor [Aphiscitricidus]	551	999	2584	0	482	551	0.87	521	551	0.94
comp808318_c0_seq1_1	106	gb|AAC16696.1| F1-ATP synthase subunit alpha [Nicotiana repanda]	89	145	366	9e-44	71	76	0.93	76	76	1
comp74924_c0_seq1_39	709	ref|XP_010103454.1| NADH dehydrogenase [ubiquinone] iron-sulfur protein 1 [Morusnotabilis]gb|EXB95899.1| NADH dehydrogenase [ubiquinone] iron-sulfur protein 1 [Morusnotabilis]	749	1314	3400	0	632	691	0.91	653	691	0.94	2	691	0
comp77207_c0_seq2_22	221	ref|XP_010092509.1| Thioredoxin M4 [Morus notabilis]gb|EXB51369.1| Thioredoxin M4 [Morus notabilis]	187	231	590	1e-74	124	190	0.65	136	190	0.71	16	190	0.08
comp69419_c0_seq1_43	685	ref|XP_008453738.1| PREDICTED: succinate dehydrogenase [ubiquinone] flavoproteinsubunit 1, mitochondrial [Cucumis melo]	635	1159	2999	0	553	636	0.86	573	636	0.9	1	636	0
comp27554_c0_seq1_10	520	gb|EYU37978.1| hypothetical protein MIMGU_mgv1a002825mg [Erythranthe guttata]	634	977	2526	0	474	499	0.94	490	499	0.98	2	499	0
comp74764_c0_seq1_8	244	ref|XP_003543368.1| PREDICTED: cytochrome b6-f complex iron-sulfur subunit,chloroplastic-like [Glycine max]	227	360	925	1e-124	170	228	0.74	190	228	0.83	1	228	0
comp36511_c0_seq1_37	570	ref|XP_010112301.1| Delta(24)-sterol reductase [Morus notabilis]gb|EXC33104.1| Delta(24)-sterol reductase [Morus notabilis]	567	1124	2908	0	530	567	0.93	555	567	0.97
comp80334_c0_seq1_31	656	ref|XP_002302483.1| malate oxidoreductase family protein [Populus trichocarpa]gb|EEE81756.1| malate oxidoreductase family protein [Populus trichocarpa]	627	1058	2736	0	516	628	0.82	539	628	0.85	1	628	0
comp79950_c0_seq1_11	429	ref|XP_009629184.1| PREDICTED: ATP-citrate synthase alpha chain protein 2 [Nicotianatomentosiformis]	423	809	2090	0	388	423	0.91	404	423	0.95
comp69198_c0_seq1_10	377	ref|XP_010111720.1| Isocitrate dehydrogenase [NAD] regulatory subunit 1 [Morusnotabilis]gb|EXC31559.1| Isocitrate dehydrogenase [NAD] regulatory subunit 1 [Morusnotabilis]	366	659	1701	0	326	366	0.89	332	366	0.9
comp69198_c0_seq1_10	377	ref|XP_010111720.1| Isocitrate dehydrogenase [NAD] regulatory subunit 1 [Morusnotabilis]gb|EXC31559.1| Isocitrate dehydrogenase [NAD] regulatory subunit 1 [Morusnotabilis]	366	659	1701	0	326	366	0.89	332	366	0.9
comp1067541_c0_seq1_4	132	ref|XP_644183.1| succinate-CoA ligase [Dictyostelium discoideum AX4]sp|Q869S7.1|SUCB2_DICDI RecName: Full=Succinyl-CoA ligase [GDP-forming] subunit beta,mitochondrial; AltName: Full=GTP-specific succinyl-CoAsynthetase subunit beta; AltName: Full=Succinyl-CoAsynthetase beta-G chain; Short=SCS-betaG; Flags:Precursor [Dictyostelium discoideum]gb|EAL70117.1| succinate-CoA ligase [Dictyostelium discoi…	420	201	510	5e-61	99	134	0.73	110	134	0.82	2	134	0.01
comp84757_c0_seq2_44	596	ref|XP_007018504.1| NADP-dependent malic enzyme [Theobroma cacao]gb|EOY15729.1| NADP-dependent malic enzyme [Theobroma cacao]	591	1023	2644	0	491	591	0.83	524	591	0.88
comp68857_c0_seq1_9	380	ref|XP_009593712.1| PREDICTED: probable protein disulfide-isomerase A6 [Nicotianatomentosiformis]	359	586	1510	0	282	359	0.78	304	359	0.84
comp77466_c0_seq2_35	511	ref|XP_007222253.1| hypothetical protein PRUPE_ppa004751mg [Prunus persica]gb|EMJ23452.1| hypothetical protein PRUPE_ppa004751mg [Prunus persica]	493	814	2102	0	389	491	0.79	439	491	0.89
comp73717_c0_seq1_12	169	ref|XP_010100109.1| Putative 12-oxophytodienoate reductase 11 [Morus notabilis]gb|EXB81492.1| Putative 12-oxophytodienoate reductase 11 [Morus notabilis]	372	277	709	5e-91	129	169	0.76	147	169	0.86
comp78543_c0_seq2_24	375	ref|XP_009368820.1| PREDICTED: NADH-cytochrome b5 reductase-like protein [Pyrus xbretschneideri]	324	550	1417	0	264	324	0.81	289	324	0.89	4	324	0.01
comp78543_c0_seq2_24	375	ref|XP_009368820.1| PREDICTED: NADH-cytochrome b5 reductase-like protein [Pyrus xbretschneideri]	324	550	1417	0	264	324	0.81	289	324	0.89	4	324	0.01
comp78543_c0_seq2_24	375	ref|XP_009368820.1| PREDICTED: NADH-cytochrome b5 reductase-like protein [Pyrus xbretschneideri]	324	550	1417	0	264	324	0.81	289	324	0.89	4	324	0.01
comp75414_c0_seq1_6	458	ref|XP_010090438.1| Malate dehydrogenase [NADP] [Morus notabilis]gb|EXB39453.1| Malate dehydrogenase [NADP] [Morus notabilis]	445	780	2015	0	370	413	0.89	393	413	0.95	2	413	0
comp83032_c0_seq3_84	507	ref|XP_010111973.1| Betaine aldehyde dehydrogenase 1 [Morus notabilis]gb|EXC32247.1| Betaine aldehyde dehydrogenase 1 [Morus notabilis]	501	892	2306	0	446	503	0.88	466	503	0.92	2	503	0
comp63853_c0_seq1_7	328	ref|XP_008237076.1| PREDICTED: soluble inorganic pyrophosphatase 1, chloroplastic[Prunus mume]	297	503	1296	1e-178	252	301	0.83	268	301	0.89	14	301	0.04
comp82623_c0_seq1_21	370	ref|XP_009800853.1| PREDICTED: hydroxyphenylpyruvate reductase-like [Nicotianasylvestris]	313	497	1279	1e-175	234	313	0.74	271	313	0.86
comp80032_c0_seq1_42	646	ref|XP_002267279.1| PREDICTED: V-type proton ATPase catalytic subunit A [Vitisvinifera]emb|CBI18438.3| unnamed protein product [Vitis vinifera]	623	1219	3155	0	588	623	0.94	600	623	0.96
comp82374_c0_seq1_12	586	ref|XP_010098196.1| Protein disulfide isomerase-like 1-4 [Morus notabilis]gb|EXB74652.1| Protein disulfide isomerase-like 1-4 [Morus notabilis]	583	835	2157	0	423	587	0.72	465	587	0.79	12	587	0.02
comp62812_c0_seq1_24	441	ref|XP_007202072.1| hypothetical protein PRUPE_ppa005968mg [Prunus persica]gb|EMJ03271.1| hypothetical protein PRUPE_ppa005968mg [Prunus persica]	434	803	2073	0	390	434	0.89	417	434	0.96
comp64113_c0_seq1_34	376	ref|XP_007215551.1| hypothetical protein PRUPE_ppa007256mg [Prunus persica]gb|EMJ16750.1| hypothetical protein PRUPE_ppa007256mg [Prunus persica]	376	696	1797	0	332	376	0.88	352	376	0.93
comp73479_c0_seq2_14	529	ref|XP_010091526.1| Geranylgeranyl diphosphate reductase [Morus notabilis]gb|EXB44696.1| Geranylgeranyl diphosphate reductase [Morus notabilis]	467	820	2117	0	405	467	0.86	416	467	0.89	1	467	0
comp79303_c0_seq1_5	196	ref|XP_010111095.1| Thioredoxin F-type [Morus notabilis]gb|EXC29957.1| Thioredoxin F-type [Morus notabilis]	184	250	638	2e-82	133	185	0.71	139	185	0.75	9	185	0.04
comp71908_c0_seq1_11	584	ref|XP_010095836.1| External alternative NADH-ubiquinone oxidoreductase [Morusnotabilis]gb|EXB62304.1| External alternative NADH-ubiquinone oxidoreductase [Morusnotabilis]	582	989	2556	0	487	582	0.83	520	582	0.89	2	582	0
comp75496_c0_seq1_21	408	ref|XP_004497872.1| PREDICTED: protein tas-like [Cicer arietinum]	420	659	1700	0	308	356	0.86	333	356	0.93
comp45172_c0_seq1_21	216	ref|XP_007514205.1| thioredoxin [Bathycoccus prasinos]emb|CCO15642.1| thioredoxin [Bathycoccus prasinos]	126	160	406	1e-47	74	89	0.83	81	89	0.91
comp80126_c0_seq1_28	360	ref|XP_004296671.1| PREDICTED: probable aldo-keto reductase 2-like [Fragaria vescasubsp. vesca]	342	535	1377	0	259	342	0.75	281	342	0.82	2	342	0
comp39607_c1_seq1_12	155	ref|XP_006376154.1| hypothetical protein POPTR_0013s10300g, partial [Populustrichocarpa]gb|ERP53951.1| hypothetical protein POPTR_0013s10300g, partial [Populustrichocarpa]	175	227	578	5e-74	105	112	0.93	110	112	0.98
comp76656_c0_seq1_34	341	ref|XP_010104745.1| Malate dehydrogenase [Morus notabilis]gb|EXC01795.1| Malate dehydrogenase [Morus notabilis]	333	637	1642	0	309	333	0.92	314	333	0.94
comp80445_c0_seq1_34	499	ref|XP_010092210.1| NADP-dependent glyceraldehyde-3-phosphate dehydrogenase [Morusnotabilis]gb|EXB50471.1| NADP-dependent glyceraldehyde-3-phosphate dehydrogenase [Morusnotabilis]	496	982	2539	0	472	496	0.95	488	496	0.98
comp75095_c0_seq1_23	322	ref|XP_010108764.1| Quinone oxidoreductase-like protein [Morus notabilis]gb|EXC20279.1| Quinone oxidoreductase-like protein [Morus notabilis]	323	399	1026	1e-137	204	309	0.66	227	309	0.73
comp78460_c0_seq1_11	522	ref|XP_008226002.1| PREDICTED: succinate-semialdehyde dehydrogenase, mitochondrial[Prunus mume]	526	897	2317	0	436	526	0.82	472	526	0.89	5	526	0
comp85001_c0_seq8_38	469	ref|XP_007215339.1| hypothetical protein PRUPE_ppa005320mg [Prunus persica]gb|EMJ16538.1| hypothetical protein PRUPE_ppa005320mg [Prunus persica]	467	698	1801	0	351	468	0.75	376	468	0.8	2	468	0
comp86339_c0_seq1_28	360	ref|XP_010095297.1| putative protein disulfide-isomerase A6 [Morus notabilis]gb|EXB59326.1| putative protein disulfide-isomerase A6 [Morus notabilis]	360	601	1549	0	290	335	0.86	318	335	0.94
comp85262_c0_seq1_13	533	ref|XP_010107898.1| UDP-glucose flavonoid 3-O-glucosyltransferase 7 [Morus notabilis]gb|EXC17298.1| UDP-glucose flavonoid 3-O-glucosyltransferase 7 [Morus notabilis]	464	671	1732	0	319	465	0.68	372	465	0.8	1	465	0
comp86204_c0_seq1_9	507	ref|XP_002315622.1| hypothetical protein POPTR_0010s06750g [Populus trichocarpa]gb|EEF01793.1| hypothetical protein POPTR_0010s06750g [Populus trichocarpa]	485	875	2261	0	423	473	0.89	433	473	0.91	9	473	0.01
comp76367_c0_seq1_25	1025	ref|XP_010096639.1| 2-oxoglutarate dehydrogenase [Morus notabilis]gb|EXB65307.1| 2-oxoglutarate dehydrogenase [Morus notabilis]	1020	1945	5038	0	921	1022	0.9	967	1022	0.94	2	1022	0
comp73026_c0_seq1_6	440	ref|XP_008339978.1| PREDICTED: pyruvate dehydrogenase E1 component subunit alpha,mitochondrial-like [Malus domestica]	399	715	1846	0	342	401	0.85	366	401	0.91	2	401	0
comp83082_c0_seq1_15	562	ref|XP_010088671.1| Dihydrolipoyllysine-residue acetyltransferase component 2 ofpyruvate dehydrogenase complex [Morus notabilis]gb|EXB36838.1| Dihydrolipoyllysine-residue acetyltransferase component 2 ofpyruvate dehydrogenase complex [Morus notabilis]	516	815	2105	0	416	544	0.76	442	544	0.81	36	544	0.06
comp73799_c0_seq1_22	395	ref|XP_007030594.1| NAD(P)-linked oxidoreductase superfamily protein [Theobroma cacao]gb|EOY11096.1| NAD(P)-linked oxidoreductase superfamily protein [Theobroma cacao]	350	546	1408	0	255	345	0.73	301	345	0.87	3	345	0
comp74991_c0_seq1_39	500	gb|AHG97672.1| glutathione reductase [Boehmeria nivea]	497	1017	2629	0	497	497	1	497	497	1
comp82317_c1_seq2_12	559	ref|XP_010038031.1| PREDICTED: glutathione reductase, chloroplastic [Eucalyptusgrandis]gb|KCW49829.1| hypothetical protein EUGRSUZ_K03307 [Eucalyptus grandis]gb|KCW49830.1| hypothetical protein EUGRSUZ_K03307 [Eucalyptus grandis]	556	931	2405	0	457	559	0.81	495	559	0.88	17	559	0.03
comp80781_c1_seq1_35	547	ref|XP_006448845.1| hypothetical protein CICLE_v10018073mg [Citrus clementina]gb|ESR62085.1| hypothetical protein CICLE_v10018073mg [Citrus clementina]	535	755	1949	0	368	503	0.73	432	503	0.85	3	503	0
comp85542_c0_seq2_27	474	ref|XP_010087965.1| Citrate synthase [Morus notabilis]gb|EXB30975.1| Citrate synthase [Morus notabilis]	473	842	2174	0	410	473	0.86	421	473	0.89
comp79670_c0_seq1_63	620	ref|XP_002276180.1| PREDICTED: serine/threonine-protein phosphatase 2A 65 kDaregulatory subunit A beta isoform [Vitis vinifera]ref|XP_010663586.1| PREDICTED: serine/threonine-protein phosphatase 2A 65 kDaregulatory subunit A beta isoform [Vitis vinifera]	587	1157	2993	0	563	587	0.95	581	587	0.98
comp88754_c0_seq1_29	374	ref|XP_010100462.1| Quinone oxidoreductase-like protein [Morus notabilis]gb|EXB82596.1| Quinone oxidoreductase-like protein [Morus notabilis]	385	542	1396	0	282	358	0.78	301	358	0.84	10	358	0.02
comp85716_c2_seq1_144	1609	ref|XP_010102189.1| hypothetical protein L484_024470 [Morus notabilis]gb|EXB93132.1| hypothetical protein L484_024470 [Morus notabilis]	2574	2828	7332	0	1385	1585	0.87	1458	1585	0.91
comp84148_c2_seq1_12	157	ref|XP_010087487.1| putative NADH dehydrogenase [ubiquinone] 1 alpha subcomplex subunit12 [Morus notabilis]gb|EXB29168.1| putative NADH dehydrogenase [ubiquinone] 1 alpha subcomplex subunit12 [Morus notabilis]	366	303	776	1e-101	140	158	0.88	151	158	0.95	3	158	0.01
comp79156_c0_seq1_29	381	ref|XP_010105494.1| ATP synthase subunit gamma [Morus notabilis]gb|EXC04880.1| ATP synthase subunit gamma [Morus notabilis]	326	587	1513	0	283	320	0.88	303	320	0.94	2	320	0
comp80534_c0_seq1_6	356	ref|XP_010092621.1| Quinone oxidoreductase PIG3 [Morus notabilis]gb|EXB51810.1| Quinone oxidoreductase PIG3 [Morus notabilis]	325	511	1316	0	255	325	0.78	275	325	0.84
comp85889_c0_seq1_44	595	ref|XP_010100450.1| putative nucleoredoxin 1 [Morus notabilis]gb|EXB82584.1| putative nucleoredoxin 1 [Morus notabilis]	568	845	2184	0	418	571	0.73	465	571	0.81	3	571	0
comp82184_c0_seq1_15	570	ref|XP_007199787.1| hypothetical protein PRUPE_ppa003960mg [Prunus persica]gb|EMJ00986.1| hypothetical protein PRUPE_ppa003960mg [Prunus persica]	538	1009	2610	0	485	541	0.89	514	541	0.95	3	541	0
comp85279_c0_seq1_63	430	gb|AAU25941.1| cytochrome b [Vitis vinifera]	393	744	1921	0	369	393	0.93	376	393	0.95
comp1680310_c0_seq1_8	133	ref|XP_005643451.1| hypothetical protein COCSUDRAFT_54807 [Coccomyxa subellipsoideaC-169]gb|EIE18907.1| hypothetical protein COCSUDRAFT_54807 [Coccomyxa subellipsoideaC-169]	675	78.2	191	1e-14	44	129	0.34	68	129	0.52	1	129	0
comp75802_c0_seq2_11	184	ref|XP_002528798.1| ATP synthase delta chain, mitochondrial, putative [Ricinuscommunis]gb|EEF33620.1| ATP synthase delta chain, mitochondrial, putative [Ricinuscommunis]	204	282	722	4e-95	138	166	0.83	149	166	0.89	2	166	0.01
comp75744_c0_seq1_7	160	gb|KDP32674.1| hypothetical protein JCGZ_13672 [Jatropha curcas]	122	187	474	5e-59	85	116	0.73	100	116	0.86
comp84134_c0_seq2_39	508	ref|XP_010101572.1| Cell division protein FtsZ-2-2-like protein [Morus notabilis]gb|EXB88711.1| Cell division protein FtsZ-2-2-like protein [Morus notabilis]	480	813	2101	0	406	479	0.84	422	479	0.88
comp75494_c0_seq1_11	493	gb|AHY02156.1| ultraviolet-B receptor UVR8 [Betula platyphylla]	441	747	1928	0	360	443	0.81	390	443	0.88	2	443	0
comp77328_c0_seq1_25	413	ref|XP_010103809.1| 14-3-3 protein 4 [Morus notabilis]gb|EXB97171.1| 14-3-3 protein 4 [Morus notabilis]	739	711	1836	0	341	378	0.9	354	378	0.93
comp42763_c0_seq1_6	156	ref|XP_006678916.1| calmodulin [Batrachochytrium dendrobatidis JAM81]gb|EGF80478.1| calmodulin [Batrachochytrium dendrobatidis JAM81]	169	274	700	8e-93	136	148	0.91	144	148	0.97
comp82021_c0_seq1_9	428	ref|XP_010088861.1| hypothetical protein L484_020848 [Morus notabilis]gb|EXB37058.1| hypothetical protein L484_020848 [Morus notabilis]	543	712	1839	0	353	389	0.9	367	389	0.94	4	389	0.01
comp78800_c0_seq1_23	397	ref|XP_007033723.1| O-acetylserine lyase B isoform 1 [Theobroma cacao]gb|EOY04649.1| O-acetylserine lyase B isoform 1 [Theobroma cacao]	402	594	1532	0	307	394	0.77	326	394	0.82	15	394	0.03
comp84436_c0_seq2_31	348	ref|XP_008455725.1| PREDICTED: cysteine synthase isoform X1 [Cucumis melo]	364	536	1381	0	275	349	0.78	290	349	0.83	2	349	0
comp81710_c0_seq1_33	1672	ref|XP_006494087.1| PREDICTED: ferredoxin-dependent glutamate synthase 1,chloroplastic/mitochondrial-like isoform X3 [Citrussinensis]	1620	2921	7573	0	1396	1604	0.87	1493	1604	0.93	12	1604	0
comp84571_c0_seq2_47	811	ref|XP_010097930.1| 5-methyltetrahydropteroyltriglutamate--homocysteinemethyltransferase [Morus notabilis]gb|EXB73286.1| 5-methyltetrahydropteroyltriglutamate--homocysteinemethyltransferase [Morus notabilis]	765	1429	3698	0	680	765	0.88	714	765	0.93
comp81293_c0_seq1_14	529	ref|XP_006426223.1| hypothetical protein CICLE_v10025372mg [Citrus clementina]ref|XP_006426225.1| hypothetical protein CICLE_v10025372mg [Citrus clementina]gb|ESR39463.1| hypothetical protein CICLE_v10025372mg [Citrus clementina]gb|ESR39465.1| hypothetical protein CICLE_v10025372mg [Citrus clementina]	517	976	2522	0	471	517	0.91	485	517	0.93
comp61727_c0_seq1_10	408	ref|XP_010102790.1| Glutamine-dependent asparagine synthetase 2 [Morus notabilis]gb|EXB94103.1| Glutamine-dependent asparagine synthetase 2 [Morus notabilis]	577	753	1943	0	357	406	0.87	375	406	0.92
comp81828_c0_seq1_59	1091	ref|XP_009361863.1| PREDICTED: glycine dehydrogenase (decarboxylating), mitochondrialisoform X1 [Pyrus x bretschneideri]ref|XP_009361876.1| PREDICTED: glycine dehydrogenase (decarboxylating), mitochondrialisoform X3 [Pyrus x bretschneideri]	1049	1800	4662	0	867	1053	0.82	929	1053	0.88	11	1053	0.01
comp77041_c0_seq1_27	429	ref|XP_002525427.1| glutamate dehydrogenase, putative [Ricinus communis]gb|EEF36917.1| glutamate dehydrogenase, putative [Ricinus communis]	411	807	2084	0	387	411	0.94	400	411	0.97
comp74861_c0_seq1_30	529	ref|XP_010095610.1| Serine carboxypeptidase-like 20 [Morus notabilis]gb|EXB61183.1| Serine carboxypeptidase-like 20 [Morus notabilis]	499	848	2190	0	395	498	0.79	445	498	0.89	1	498	0
comp35411_c0_seq1_11	470	ref|XP_010105305.1| LL-diaminopimelate aminotransferase [Morus notabilis]gb|EXC04279.1| LL-diaminopimelate aminotransferase [Morus notabilis]	463	814	2102	0	390	433	0.9	405	433	0.93
comp86110_c0_seq1_27	400	ref|XP_010103463.1| Glutamine synthetase nodule isozyme [Morus notabilis]gb|EXB95908.1| Glutamine synthetase nodule isozyme [Morus notabilis]	356	679	1753	0	325	342	0.95	334	342	0.97
comp86777_c0_seq1_4	110	ref|XP_010099692.1| Glutamate decarboxylase [Morus notabilis]gb|EXB80269.1| Glutamate decarboxylase [Morus notabilis]	499	220	560	4e-68	104	110	0.94	108	110	0.98
comp76590_c0_seq1_31	432	ref|XP_010105702.1| Glutamine synthetase leaf isozyme [Morus notabilis]gb|EXC05733.1| Glutamine synthetase leaf isozyme [Morus notabilis]	433	791	2044	0	372	433	0.85	404	433	0.93	3	433	0
comp42964_c0_seq1_18	222	ref|XP_007051217.1| Nitrogen regulatory protein P-II [Theobroma cacao]gb|EOX95374.1| Nitrogen regulatory protein P-II [Theobroma cacao]	198	257	656	2e-84	130	160	0.81	142	160	0.88	3	160	0.01
comp79941_c0_seq1_7	410	ref|XP_010088178.1| Aspartate-semialdehyde dehydrogenase [Morus notabilis]gb|EXB32318.1| Aspartate-semialdehyde dehydrogenase [Morus notabilis]	376	597	1540	0	288	376	0.76	323	376	0.85	1	376	0
comp79654_c0_seq1_12	480	ref|XP_010089944.1| Aspartate aminotransferase [Morus notabilis]gb|EXB38640.1| Aspartate aminotransferase [Morus notabilis]	482	862	2228	0	415	461	0.9	433	461	0.93	16	461	0.03
comp80998_c0_seq1_11	397	gb|KHG29839.1| Glutamine synthetase cytosolic isozyme 1-1 [Gossypium arboreum]	356	678	1750	0	323	342	0.94	336	342	0.98
comp77894_c1_seq1_8	431	ref|XP_010099191.1| Aminomethyltransferase [Morus notabilis]gb|EXB77063.1| Aminomethyltransferase [Morus notabilis]	407	806	2082	0	389	407	0.95	397	407	0.97
comp76640_c0_seq1_11	498	ref|XP_010096539.1| Alanine aminotransferase 2 [Morus notabilis]gb|EXB64659.1| Alanine aminotransferase 2 [Morus notabilis]	537	919	2374	0	441	476	0.92	451	476	0.94
comp55013_c0_seq1_6	266	ref|XP_010111828.1| hypothetical protein L484_020618 [Morus notabilis]gb|EXC31793.1| hypothetical protein L484_020618 [Morus notabilis]	236	385	990	1e-134	179	200	0.89	190	200	0.95
comp56765_c0_seq1_25	423	ref|XP_010087942.1| Cysteine synthase [Morus notabilis]gb|EXB30864.1| Cysteine synthase [Morus notabilis]	372	662	1708	0	325	375	0.86	340	375	0.9	8	375	0.02
comp78105_c0_seq1_34	572	ref|XP_008224581.1| PREDICTED: putative dihydroxy-acid dehydratase, mitochondrial[Prunus mume]	618	1014	2623	0	487	557	0.87	520	557	0.93
comp69198_c0_seq1_10	377	ref|XP_010111720.1| Isocitrate dehydrogenase [NAD] regulatory subunit 1 [Morusnotabilis]gb|EXC31559.1| Isocitrate dehydrogenase [NAD] regulatory subunit 1 [Morusnotabilis]	366	659	1701	0	326	366	0.89	332	366	0.9
comp81028_c1_seq1_129	2215	ref|XP_007220571.1| hypothetical protein PRUPE_ppa000037mg [Prunus persica]gb|EMJ21770.1| hypothetical protein PRUPE_ppa000037mg [Prunus persica]	2207	3865	10024	0	1865	2216	0.84	2007	2216	0.9	11	2216	0
comp71613_c0_seq9_42	936	ref|XP_010094965.1| Puromycin-sensitive aminopeptidase [Morus notabilis]gb|EXB57658.1| Puromycin-sensitive aminopeptidase [Morus notabilis]	870	1488	3852	0	726	878	0.82	783	878	0.89	12	878	0.01
comp73788_c0_seq1_24	284	gb|KHG29245.1| leuD [Gossypium arboreum]	259	312	800	1e-104	149	179	0.83	156	179	0.87
comp75992_c0_seq1_29	484	ref|XP_010100270.1| Aspartate aminotransferase [Morus notabilis]gb|EXB82277.1| Aspartate aminotransferase [Morus notabilis]	463	808	2088	0	390	451	0.86	418	451	0.92	4	451	0
comp79478_c0_seq1_12	483	ref|XP_002274723.1| PREDICTED: serine carboxypeptidase-like 27 [Vitis vinifera]emb|CBI31485.3| unnamed protein product [Vitis vinifera]	456	767	1980	0	354	445	0.79	395	445	0.88
comp61251_c0_seq1_18	810	ref|XP_010105127.1| Oligopeptidase A [Morus notabilis]gb|EXC03912.1| Oligopeptidase A [Morus notabilis]	811	1310	3391	0	649	808	0.8	691	808	0.85	15	808	0.01
comp82215_c1_seq1_16	596	ref|XP_010103164.1| (R)-mandelonitrile lyase 2 [Morus notabilis]gb|EXB94929.1| (R)-mandelonitrile lyase 2 [Morus notabilis]	504	701	1809	0	336	498	0.67	398	498	0.79	1	498	0
comp60404_c0_seq1_4	292	ref|XP_003534533.1| PREDICTED: putative lactoylglutathione lyase-like isoform X1[Glycine max]	296	526	1354	0	248	273	0.9	265	273	0.97
comp85993_c0_seq1_8	333	ref|XP_010023584.1| PREDICTED: spermidine synthase 1 [Eucalyptus grandis]gb|KCW59895.1| hypothetical protein EUGRSUZ_H02622 [Eucalyptus grandis]	341	565	1456	0	277	339	0.81	304	339	0.89	13	339	0.03
comp77182_c1_seq1_9	407	gb|KHG29969.1| Serine--glyoxylate aminotransferase -like protein [Gossypiumarboreum]	401	724	1869	0	348	401	0.86	365	401	0.91
comp80797_c0_seq1_38	455	ref|XP_004165871.1| PREDICTED: imidazole glycerol phosphate synthase hisHF,chloroplastic-like [Cucumis sativus]	593	666	1718	0	319	365	0.87	341	365	0.93
comp80797_c0_seq1_38	455	ref|XP_004165871.1| PREDICTED: imidazole glycerol phosphate synthase hisHF,chloroplastic-like [Cucumis sativus]	593	666	1718	0	319	365	0.87	341	365	0.93
comp82417_c0_seq2_7	419	ref|XP_004290305.1| PREDICTED: probable N-acetyl-gamma-glutamyl-phosphate reductase,chloroplastic-like [Fragaria vesca subsp. vesca]	393	679	1751	0	318	390	0.81	349	390	0.89
comp68734_c0_seq1_25	377	ref|XP_010099028.1| hypothetical protein L484_005320 [Morus notabilis]gb|EXB76386.1| hypothetical protein L484_005320 [Morus notabilis]	375	669	1725	0	315	372	0.84	348	372	0.93	1	372	0
comp62855_c0_seq2_18	716	ref|XP_010095431.1| hypothetical protein L484_013388 [Morus notabilis]gb|EXB60123.1| hypothetical protein L484_013388 [Morus notabilis]	732	1078	2788	0	527	712	0.74	588	712	0.82	22	712	0.03
comp79178_c0_seq1_12	499	ref|XP_008243055.1| PREDICTED: acetolactate synthase small subunit 2, chloroplasticisoform X2 [Prunus mume]	494	708	1828	0	343	409	0.83	377	409	0.92
comp76258_c0_seq1_16	992	ref|XP_010089082.1| Aminopeptidase N [Morus notabilis]gb|EXB37329.1| Aminopeptidase N [Morus notabilis]	948	1633	4228	0	795	964	0.82	844	964	0.87	24	964	0.02
comp87765_c0_seq1_12	533	ref|XP_010108405.1| Serine hydroxymethyltransferase [Morus notabilis]gb|EXC19409.1| Serine hydroxymethyltransferase [Morus notabilis]	517	885	2286	0	439	529	0.82	459	529	0.86	16	529	0.03
comp79153_c0_seq3_97	996	ref|XP_010087237.1| putative glutamyl endopeptidase [Morus notabilis]gb|EXB28587.1| putative glutamyl endopeptidase [Morus notabilis]	1305	1540	3988	0	737	883	0.83	789	883	0.89	15	883	0.01
comp63366_c0_seq1_21	432	ref|XP_010266695.1| PREDICTED: phosphoserine aminotransferase 1, chloroplastic-like[Nelumbo nucifera]	429	670	1728	0	311	382	0.81	343	382	0.89
comp82639_c1_seq1_45	275	ref|XP_010107718.1| hypothetical protein L484_013333 [Morus notabilis]gb|EXC16753.1| hypothetical protein L484_013333 [Morus notabilis]	251	438	1126	1e-154	211	250	0.84	234	250	0.93	1	250	0
comp63933_c0_seq1_38	464	ref|XP_010093337.1| hypothetical protein L484_002939 [Morus notabilis]gb|EXB53900.1| hypothetical protein L484_002939 [Morus notabilis]	469	730	1884	0	349	438	0.79	389	438	0.88	19	438	0.04
comp86594_c0_seq1_4	115	ref|XP_006652335.1| PREDICTED: glutamate decarboxylase 4-like [Oryza brachyantha]	484	222	566	4e-69	99	115	0.86	108	115	0.93
comp84760_c0_seq1_56	587	ref|XP_010103674.1| Leucine aminopeptidase 3 [Morus notabilis]gb|EXB96617.1| Leucine aminopeptidase 3 [Morus notabilis]	579	922	2384	0	460	553	0.83	478	553	0.86	1	553	0
comp83973_c0_seq1_49	831	ref|XP_010101294.1| Prolyl endopeptidase [Morus notabilis]gb|EXB88229.1| Prolyl endopeptidase [Morus notabilis]	729	1389	3596	0	658	730	0.9	694	730	0.95	1	730	0
comp83973_c0_seq1_49	831	ref|XP_010101294.1| Prolyl endopeptidase [Morus notabilis]gb|EXB88229.1| Prolyl endopeptidase [Morus notabilis]	729	1389	3596	0	658	730	0.9	694	730	0.95	1	730	0
comp85924_c0_seq1_17	489	ref|XP_010100388.1| Glutamate--glyoxylate aminotransferase 2 [Morus notabilis]gb|EXB82522.1| Glutamate--glyoxylate aminotransferase 2 [Morus notabilis]	481	950	2455	0	455	481	0.94	471	481	0.97
comp83152_c0_seq2_37	590	ref|XP_010096469.1| Bifunctional 3-dehydroquinate dehydratase/shikimate dehydrogenase[Morus notabilis]gb|EXB64479.1| Bifunctional 3-dehydroquinate dehydratase/shikimate dehydrogenase[Morus notabilis]	622	840	2171	0	405	495	0.81	439	495	0.88	2	495	0
comp83152_c0_seq2_37	590	ref|XP_010096469.1| Bifunctional 3-dehydroquinate dehydratase/shikimate dehydrogenase[Morus notabilis]gb|EXB64479.1| Bifunctional 3-dehydroquinate dehydratase/shikimate dehydrogenase[Morus notabilis]	622	840	2171	0	405	495	0.81	439	495	0.88	2	495	0
comp82485_c0_seq1_27	476	ref|XP_010087792.1| N-carbamoyl-L-amino acid hydrolase [Morus notabilis]gb|EXB29873.1| N-carbamoyl-L-amino acid hydrolase [Morus notabilis]	471	778	2008	0	395	476	0.82	415	476	0.87	5	476	0.01
comp78989_c0_seq1_11	499	ref|XP_002517289.1| serine carboxypeptidase, putative [Ricinus communis]gb|EEF45082.1| serine carboxypeptidase, putative [Ricinus communis]	464	719	1856	0	330	453	0.72	393	453	0.86	2	453	0
comp77053_c0_seq1_7	379	ref|XP_008373270.1| PREDICTED: phospho-2-dehydro-3-deoxyheptonate aldolase 2,chloroplastic-like [Malus domestica]	518	738	1906	0	347	379	0.91	360	379	0.94
comp74466_c0_seq1_37	589	ref|XP_008244478.1| PREDICTED: ketol-acid reductoisomerase, chloroplastic [Prunus mume]	588	1003	2592	0	481	566	0.84	513	566	0.9	4	566	0
comp76647_c0_seq1_11	608	ref|XP_004496955.1| PREDICTED: d-3-phosphoglycerate dehydrogenase, chloroplastic-likeisoform X1 [Cicer arietinum]ref|XP_004496956.1| PREDICTED: d-3-phosphoglycerate dehydrogenase, chloroplastic-likeisoform X2 [Cicer arietinum]	596	929	2401	0	462	553	0.83	488	553	0.88
comp78765_c0_seq1_14	676	ref|XP_010091406.1| hypothetical protein L484_013861 [Morus notabilis]gb|EXB44443.1| hypothetical protein L484_013861 [Morus notabilis]	662	931	2405	0	465	679	0.68	541	679	0.79	28	679	0.04
comp74685_c0_seq1_14	159	gb|AFK36203.1| unknown [Lotus japonicus]	155	278	710	2e-94	131	155	0.84	143	155	0.92
comp69316_c0_seq1_10	312	ref|XP_010094006.1| hypothetical protein L484_007352 [Morus notabilis]gb|EXB55021.1| hypothetical protein L484_007352 [Morus notabilis]	237	451	1161	1e-159	216	237	0.91	228	237	0.96
comp83368_c0_seq1_31	449	ref|XP_010101721.1| Serine carboxypeptidase-like 50 [Morus notabilis]gb|EXB89385.1| Serine carboxypeptidase-like 50 [Morus notabilis]	447	557	1435	0	276	405	0.68	325	405	0.8	9	405	0.02
comp76520_c0_seq1_7	499	ref|XP_010112534.1| Serine carboxypeptidase-like 34 [Morus notabilis]gb|EXC33987.1| Serine carboxypeptidase-like 34 [Morus notabilis]	491	795	2053	0	371	476	0.77	411	476	0.86	8	476	0.01
comp83312_c0_seq3_51	776	ref|XP_010100754.1| Dipeptidyl peptidase 8 [Morus notabilis]gb|EXB84221.1| Dipeptidyl peptidase 8 [Morus notabilis]	881	1300	3363	0	625	776	0.8	665	776	0.85
comp78373_c0_seq21_23	233	ref|XP_010098895.1| putative plastid-lipid-associated protein 7 [Morus notabilis]gb|EXB76037.1| putative plastid-lipid-associated protein 7 [Morus notabilis]	230	219	558	6e-69	106	130	0.81	115	130	0.88	1	130	0
comp71621_c0_seq1_22	364	ref|XP_008242558.1| PREDICTED: probable lactoylglutathione lyase, chloroplast [Prunusmume]	360	602	1551	0	289	330	0.87	308	330	0.93	2	330	0
comp74782_c0_seq1_23	390	ref|XP_010097384.1| Diaminopimelate epimerase [Morus notabilis]gb|EXB67890.1| Diaminopimelate epimerase [Morus notabilis]	359	569	1466	0	277	331	0.83	294	331	0.88
comp78703_c0_seq1_8	422	ref|XP_002285843.1| PREDICTED: aminoacylase-1 [Vitis vinifera]ref|XP_003634461.1| PREDICTED: aminoacylase-1 [Vitis vinifera]ref|XP_010664226.1| PREDICTED: aminoacylase-1 [Vitis vinifera]	450	668	1723	0	309	404	0.76	356	404	0.88
comp69215_c0_seq1_10	464	ref|XP_010099398.1| Cysteine desulfurase 1 [Morus notabilis]gb|EXB78243.1| Cysteine desulfurase 1 [Morus notabilis]	458	798	2060	0	385	458	0.84	408	458	0.89
comp82429_c0_seq1_9	462	ref|XP_004496285.1| PREDICTED: chorismate synthase, chloroplastic-like isoform X1[Cicer arietinum]	435	714	1843	0	335	422	0.79	378	422	0.89	5	422	0.01
comp79366_c0_seq1_27	430	ref|XP_010110407.1| Phosphoribulokinase [Morus notabilis]gb|EXC26239.1| Phosphoribulokinase [Morus notabilis]	411	736	1901	0	363	415	0.87	377	415	0.9	15	415	0.03
comp73128_c0_seq1_16	215	gb|ADB85102.1| nucleoside diphosphate kinase B [Jatropha curcas]gb|KDP28873.1| hypothetical protein JCGZ_14644 [Jatropha curcas]	148	287	735	2e-97	136	148	0.91	144	148	0.97
comp73929_c1_seq1_10	255	ref|XP_010093431.1| Nucleoside diphosphate kinase IV [Morus notabilis]gb|EXB54041.1| Nucleoside diphosphate kinase IV [Morus notabilis]	233	375	964	1e-130	181	237	0.76	200	237	0.84	4	237	0.01
comp75855_c0_seq1_11	602	ref|XP_007132548.1| hypothetical protein PHAVU_011G103800g [Phaseolus vulgaris]gb|ESW04542.1| hypothetical protein PHAVU_011G103800g [Phaseolus vulgaris]	558	882	2278	0	433	500	0.86	466	500	0.93	7	500	0.01
comp79676_c1_seq1_14	649	ref|XP_002297654.1| 10-formyltetrahydrofolate synthetase family protein [Populustrichocarpa]gb|EEE82459.1| 10-formyltetrahydrofolate synthetase family protein [Populustrichocarpa]	636	1117	2888	0	537	636	0.84	570	636	0.89
comp57820_c0_seq1_15	254	ref|XP_006440074.1| hypothetical protein CICLE_v10021896mg [Citrus clementina]ref|XP_006476999.1| PREDICTED: adenylate kinase B-like [Citrus sinensis]gb|ESR53314.1| hypothetical protein CICLE_v10021896mg [Citrus clementina]gb|KDO52598.1| hypothetical protein CISIN_1g025529mg [Citrus sinensis]	246	472	1215	1e-168	226	243	0.93	236	243	0.97
comp83363_c0_seq2_32	477	ref|XP_010091317.1| Adenylosuccinate lyase [Morus notabilis]gb|EXB44291.1| Adenylosuccinate lyase [Morus notabilis]	560	805	2079	0	388	491	0.79	425	491	0.86	21	491	0.04
comp79137_c0_seq2_9	292	ref|XP_010091232.1| Adenine phosphoribosyltransferase 1 [Morus notabilis]gb|EXB43795.1| Adenine phosphoribosyltransferase 1 [Morus notabilis]	262	349	896	1e-119	175	213	0.82	191	213	0.89	5	213	0.02
comp27750_c0_seq2_7	165	ref|XP_007202700.1| hypothetical protein PRUPE_ppa012689mg [Prunus persica]gb|EMJ03899.1| hypothetical protein PRUPE_ppa012689mg [Prunus persica]	158	239	611	3e-79	116	158	0.73	127	158	0.8	1	158	0
comp74959_c0_seq1_7	371	ref|XP_010100640.1| Bark storage protein A [Morus notabilis]gb|EXB83505.1| Bark storage protein A [Morus notabilis]	350	481	1237	1e-168	231	306	0.75	253	306	0.82	3	306	0
comp76723_c0_seq1_17	372	ref|XP_009367890.1| PREDICTED: bark storage protein A-like isoform X3 [Pyrus xbretschneideri]	348	513	1322	0	249	329	0.75	272	329	0.82	1	329	0
comp78373_c0_seq21_23	233	ref|XP_010098895.1| putative plastid-lipid-associated protein 7 [Morus notabilis]gb|EXB76037.1| putative plastid-lipid-associated protein 7 [Morus notabilis]	230	219	558	6e-69	106	130	0.81	115	130	0.88	1	130	0
comp25997_c0_seq2_6	242	gb|AAK38732.1| nucleoside diphosphate kinase [Dunaliella tertiolecta]	221	239	611	5e-77	110	158	0.69	134	158	0.84	4	158	0.02
comp30581_c0_seq1_7	432	ref|XP_010097115.1| Phosphoribosylformylglycinamidine cyclo-ligase [Morus notabilis]gb|EXB66976.1| Phosphoribosylformylglycinamidine cyclo-ligase [Morus notabilis]	426	570	1468	0	282	319	0.88	296	319	0.92
comp82467_c0_seq2_28	493	ref|XP_010095961.1| Uridine 5'-monophosphate synthase [Morus notabilis]gb|EXB62654.1| Uridine 5'-monophosphate synthase [Morus notabilis]	478	778	2008	0	380	476	0.79	414	476	0.86	2	476	0
comp82467_c0_seq2_28	493	ref|XP_010095961.1| Uridine 5'-monophosphate synthase [Morus notabilis]gb|EXB62654.1| Uridine 5'-monophosphate synthase [Morus notabilis]	478	778	2008	0	380	476	0.79	414	476	0.86	2	476	0
comp48511_c0_seq2_4	222	gb|ABL61361.1| ribulose-1,5-bisphosphate carboxylase/oxygenase large subunit,partial (chloroplast) [Haematococcus zimbabwiensis]	379	414	1063	1e-144	200	218	0.91	202	218	0.92
comp420243_c0_seq1_2	97	ref|NP_001172597.1| Os01g0791033 [Oryza sativa Japonica Group]dbj|BAH91327.1| Os01g0791033 [Oryza sativa Japonica Group]	262	205	522	2e-65	97	97	1	97	97	1
comp67924_c0_seq1_11	422	ref|XP_010090946.1| Glyceraldehyde-3-phosphate dehydrogenase A [Morus notabilis]gb|EXB41431.1| Glyceraldehyde-3-phosphate dehydrogenase A [Morus notabilis]	404	600	1546	0	299	371	0.8	311	371	0.83	3	371	0
comp75310_c0_seq1_31	425	ref|XP_010093027.1| Sedoheptulose-1,7-bisphosphatase [Morus notabilis]gb|EXB53355.1| Sedoheptulose-1,7-bisphosphatase [Morus notabilis]	393	681	1758	0	335	393	0.85	350	393	0.89	1	393	0
comp68764_c0_seq1_34	459	ref|XP_008237955.1| PREDICTED: glyceraldehyde-3-phosphate dehydrogenase B,chloroplastic [Prunus mume]	452	825	2132	0	402	452	0.88	415	452	0.91
comp85102_c1_seq1_6	433	ref|XP_007202080.1| hypothetical protein PRUPE_ppa007396mg [Prunus persica]gb|EMJ03279.1| hypothetical protein PRUPE_ppa007396mg [Prunus persica]	369	490	1262	1e-170	248	345	0.71	285	345	0.82	6	345	0.01
comp61993_c0_seq1_28	566	ref|XP_010113038.1| 2,3-bisphosphoglycerate-independent phosphoglycerate mutase [Morusnotabilis]gb|EXC35209.1| 2,3-bisphosphoglycerate-independent phosphoglycerate mutase [Morusnotabilis]	559	1039	2686	0	502	559	0.89	526	559	0.94
comp84469_c0_seq2_29	523	ref|XP_006483674.1| PREDICTED: vicianin hydrolase-like [Citrus sinensis]	519	666	1718	0	310	487	0.63	375	487	0.77
comp39370_c0_seq1_9	427	gb|AER26531.1| fructose 1,6 bisphosphate aldolase class 1 [Carica papaya]	396	710	1832	0	347	386	0.89	356	386	0.92	3	386	0
comp79217_c0_seq1_7	343	ref|XP_006443006.1| hypothetical protein CICLE_v10021105mg [Citrus clementina]ref|XP_006478719.1| PREDICTED: probable fructokinase-4-like [Citrus sinensis]gb|ESR56246.1| hypothetical protein CICLE_v10021105mg [Citrus clementina]	329	571	1471	0	280	317	0.88	292	317	0.92
comp85946_c0_seq1_15	615	ref|XP_010100225.1| Granule-bound starch synthase 1 [Morus notabilis]gb|EXB81896.1| Granule-bound starch synthase 1 [Morus notabilis]	611	961	2484	0	462	614	0.75	530	614	0.86	4	614	0
comp85015_c0_seq1_55	946	ref|XP_010103777.1| hypothetical protein L484_014667 [Morus notabilis]gb|EXB97055.1| hypothetical protein L484_014667 [Morus notabilis]	932	1595	4130	0	758	913	0.83	822	913	0.9	6	913	0
comp72139_c0_seq1_27	397	ref|XP_010036726.1| PREDICTED: fructose-bisphosphate aldolase, cytoplasmic isozyme[Eucalyptus grandis]gb|KCW48360.1| hypothetical protein EUGRSUZ_K02073 [Eucalyptus grandis]	358	676	1743	0	329	358	0.91	339	358	0.94
comp79849_c0_seq1_31	527	ref|XP_010107371.1| Glucose-1-phosphate adenylyltransferase small subunit [Morusnotabilis]gb|EXC15622.1| Glucose-1-phosphate adenylyltransferase small subunit [Morusnotabilis]	522	933	2412	0	469	525	0.89	483	525	0.92	3	525	0
comp83131_c3_seq1_40	773	ref|XP_010098926.1| Transketolase [Morus notabilis]gb|EXB76228.1| Transketolase [Morus notabilis]	746	1272	3291	0	615	731	0.84	646	731	0.88	3	731	0
comp76238_c0_seq1_10	350	ref|XP_009368895.1| PREDICTED: adenosine kinase 2 [Pyrus x bretschneideri]	341	651	1680	0	307	339	0.9	326	339	0.96
comp71397_c0_seq2_16	486	ref|XP_007022578.1| Phosphoglycerate kinase 1 [Theobroma cacao]gb|EOY14103.1| Phosphoglycerate kinase 1 [Theobroma cacao]	491	784	2025	0	402	440	0.91	411	440	0.93	3	440	0
comp74948_c0_seq1_11	396	ref|XP_010092951.1| hypothetical protein L484_018888 [Morus notabilis]gb|EXB53004.1| hypothetical protein L484_018888 [Morus notabilis]	380	692	1787	0	338	381	0.88	355	381	0.93	1	381	0
comp74948_c0_seq1_11	396	ref|XP_010092951.1| hypothetical protein L484_018888 [Morus notabilis]gb|EXB53004.1| hypothetical protein L484_018888 [Morus notabilis]	380	692	1787	0	338	381	0.88	355	381	0.93	1	381	0
comp77656_c0_seq1_12	597	ref|XP_010106248.1| hypothetical protein L484_005113 [Morus notabilis]gb|EXC09157.1| hypothetical protein L484_005113 [Morus notabilis]	571	936	2420	0	448	573	0.78	500	573	0.87	4	573	0
comp54730_c0_seq1_9	426	ref|XP_008229214.1| PREDICTED: probable fructokinase-4 [Prunus mume]	383	522	1345	0	262	385	0.68	296	385	0.76	3	385	0
comp54150_c0_seq1_13	480	ref|XP_010101050.1| UTP--glucose-1-phosphate uridylyltransferase [Morus notabilis]gb|EXB86760.1| UTP--glucose-1-phosphate uridylyltransferase [Morus notabilis]	688	855	2210	0	418	470	0.88	438	470	0.93
comp76062_c0_seq1_10	522	ref|XP_002273684.2| PREDICTED: furcatin hydrolase [Vitis vinifera]emb|CBI24931.3| unnamed protein product [Vitis vinifera]	506	517	1331	1e-177	265	508	0.52	340	508	0.66	17	508	0.03
comp84247_c0_seq2_11	619	ref|XP_010101975.1| Phosphoglucomutase [Morus notabilis]gb|EXB90899.1| Phosphoglucomutase [Morus notabilis]	582	1113	2880	0	535	582	0.91	551	582	0.94
comp84247_c0_seq2_11	619	ref|XP_010101975.1| Phosphoglucomutase [Morus notabilis]gb|EXB90899.1| Phosphoglucomutase [Morus notabilis]	582	1113	2880	0	535	582	0.91	551	582	0.94
comp84678_c0_seq1_18	904	ref|XP_010111246.1| 4-alpha-glucanotransferase DPE2 [Morus notabilis]gb|EXC30724.1| 4-alpha-glucanotransferase DPE2 [Morus notabilis]	990	1601	4146	0	764	930	0.82	812	930	0.87	35	930	0.03
comp79756_c0_seq1_20	348	ref|XP_008223104.1| PREDICTED: uncharacterized protein LOC103322925 isoform X2 [Prunusmume]	338	485	1249	1e-170	237	340	0.69	270	340	0.79	12	340	0.03
comp75074_c0_seq1_16	519	ref|XP_010105293.1| Pyruvate kinase, cytosolic isozyme [Morus notabilis]gb|EXC04258.1| Pyruvate kinase, cytosolic isozyme [Morus notabilis]	506	967	2499	0	469	493	0.95	480	493	0.97
comp59412_c0_seq1_14	548	ref|XP_010110656.1| hypothetical protein L484_004573 [Morus notabilis]gb|EXC27501.1| hypothetical protein L484_004573 [Morus notabilis]	499	917	2371	0	443	500	0.88	465	500	0.93	1	500	0
comp80282_c0_seq5_29	375	ref|XP_006474808.1| PREDICTED: fructose-bisphosphate aldolase, cytoplasmic isozyme1-like [Citrus sinensis]	357	668	1723	0	323	357	0.9	338	357	0.94
comp66481_c0_seq1_10	409	ref|XP_007030576.1| GDP-mannose 3,5-epimerase 1 [Theobroma cacao]gb|EOY11078.1| GDP-mannose 3,5-epimerase 1 [Theobroma cacao]	426	753	1944	0	357	384	0.92	364	384	0.94
comp27505_c0_seq1_22	1214	ref|XP_004296959.1| PREDICTED: phosphoglucan, water dikinase, chloroplastic-like[Fragaria vesca subsp. vesca]	1112	1612	4175	0	805	1116	0.72	902	1116	0.8	25	1116	0.02
comp73866_c0_seq1_50	868	ref|XP_007018019.1| Starch branching enzyme 2.2 isoform 1 [Theobroma cacao]gb|EOY15244.1| Starch branching enzyme 2.2 isoform 1 [Theobroma cacao]	886	1343	3477	0	640	814	0.78	711	814	0.87	27	814	0.03
comp75934_c0_seq1_8	506	ref|XP_002517676.1| 6-phosphogluconate dehydrogenase, putative [Ricinus communis]gb|EEF44840.1| 6-phosphogluconate dehydrogenase, putative [Ricinus communis]	495	910	2351	0	440	495	0.88	464	495	0.93
comp55270_c0_seq1_24	352	dbj|BAN45710.1| putative glycelaldehyde-3-phosphate dehydrogenase, partial [Pyruspyrifolia var. culta]	334	578	1489	0	279	322	0.86	294	322	0.91
comp76748_c0_seq1_11	527	gb|KDP24308.1| hypothetical protein JCGZ_25604 [Jatropha curcas]	488	905	2339	0	439	481	0.91	461	481	0.95	1	481	0
comp83553_c0_seq1_18	825	ref|XP_010111676.1| putative beta-D-xylosidase 5 [Morus notabilis]gb|EXC31467.1| putative beta-D-xylosidase 5 [Morus notabilis]	802	1228	3177	0	584	782	0.74	653	782	0.83	12	782	0.01
comp84395_c0_seq5_21	685	ref|XP_010103976.1| Lysosomal beta glucosidase [Morus notabilis]gb|EXB97679.1| Lysosomal beta glucosidase [Morus notabilis]	669	1137	2940	0	542	651	0.83	584	651	0.89	2	651	0
comp69477_c0_seq1_17	218	ref|XP_008242483.1| PREDICTED: hexokinase-1 [Prunus mume]	498	363	932	1e-122	176	217	0.81	186	217	0.85
comp70030_c0_seq1_14	494	ref|XP_010104447.1| Hexokinase-2 [Morus notabilis]gb|EXC00980.1| Hexokinase-2 [Morus notabilis]	497	840	2170	0	412	497	0.82	435	497	0.87	6	497	0.01
comp77070_c0_seq1_28	417	ref|XP_010101845.1| Fructose-1,6-bisphosphatase [Morus notabilis]gb|EXB89982.1| Fructose-1,6-bisphosphatase [Morus notabilis]	413	641	1654	0	320	385	0.83	330	385	0.85	5	385	0.01
comp86214_c1_seq1_27	323	ref|XP_004142064.1| PREDICTED: uncharacterized protein At2g37660, chloroplastic-like[Cucumis sativus]gb|KGN54259.1| hypothetical protein Csa_4G296130 [Cucumis sativus]	326	491	1263	1e-173	251	335	0.74	276	335	0.82	23	335	0.06
comp78105_c0_seq1_34	572	ref|XP_008224581.1| PREDICTED: putative dihydroxy-acid dehydratase, mitochondrial[Prunus mume]	618	1014	2623	0	487	557	0.87	520	557	0.93
comp65743_c0_seq1_50	545	ref|XP_010093993.1| Glucose-1-phosphate adenylyltransferase large subunit 1 [Morusnotabilis]gb|EXB55008.1| Glucose-1-phosphate adenylyltransferase large subunit 1 [Morusnotabilis]	523	971	2509	0	475	534	0.88	493	534	0.92	13	534	0.02
comp43126_c0_seq1_26	556	ref|XP_010089609.1| Alpha-1,4 glucan phosphorylase L isozyme [Morus notabilis]gb|EXB38080.1| Alpha-1,4 glucan phosphorylase L isozyme [Morus notabilis]	978	808	2086	0	396	511	0.77	427	511	0.83	7	511	0.01
comp79891_c1_seq1_11	547	ref|XP_010088479.1| hypothetical protein L484_013684 [Morus notabilis]gb|EXB36249.1| hypothetical protein L484_013684 [Morus notabilis]	625	694	1791	0	380	554	0.68	415	554	0.74	22	554	0.03
comp97032_c0_seq1_10	549	ref|XP_010646460.1| PREDICTED: beta-hexosaminidase 3-like [Vitis vinifera]	522	790	2041	0	377	509	0.74	428	509	0.84	13	509	0.02
comp704030_c0_seq1_8	90	ref|XP_010099021.1| Strictosidine synthase 1 [Morus notabilis]gb|EXB76379.1| Strictosidine synthase 1 [Morus notabilis]	328	127	319	3e-34	61	81	0.75	70	81	0.86
comp40646_c0_seq1_35	638	ref|XP_003592358.1| Phosphoglucomutase [Medicago truncatula]gb|AES62609.1| phosphogluco-mutase [Medicago truncatula]	628	1039	2687	0	498	575	0.86	530	575	0.92
comp40646_c0_seq1_35	638	ref|XP_003592358.1| Phosphoglucomutase [Medicago truncatula]gb|AES62609.1| phosphogluco-mutase [Medicago truncatula]	628	1039	2687	0	498	575	0.86	530	575	0.92
comp74333_c1_seq1_33	452	ref|XP_002297881.2| transaldolase family protein [Populus trichocarpa]gb|EEE82686.2| transaldolase family protein [Populus trichocarpa]	440	667	1720	0	328	383	0.85	343	383	0.89
comp85337_c0_seq1_66	851	ref|XP_009374296.1| PREDICTED: alpha-glucan phosphorylase, H isozyme-like [Pyrus xbretschneideri]	846	1537	3979	0	730	846	0.86	770	846	0.91
comp83725_c0_seq1_16	656	ref|XP_006487803.1| PREDICTED: lysosomal beta glucosidase-like isoform X1 [Citrussinensis]ref|XP_006487804.1| PREDICTED: lysosomal beta glucosidase-like isoform X2 [Citrussinensis]	628	1043	2697	0	504	628	0.8	546	628	0.86	4	628	0
comp79199_c0_seq1_34	395	ref|XP_002526308.1| fructose-bisphosphate aldolase, putative [Ricinus communis]gb|EEF36097.1| fructose-bisphosphate aldolase, putative [Ricinus communis]	394	754	1948	0	363	394	0.92	378	394	0.95
comp76168_c0_seq1_13	622	ref|XP_007222012.1| hypothetical protein PRUPE_ppa002932mg [Prunus persica]gb|EMJ23211.1| hypothetical protein PRUPE_ppa002932mg [Prunus persica]	620	1046	2704	0	517	621	0.83	550	621	0.88	7	621	0.01
comp83103_c0_seq1_9	361	ref|XP_010102363.1| hypothetical protein L484_015312 [Morus notabilis]gb|EXB93324.1| hypothetical protein L484_015312 [Morus notabilis]	328	557	1436	0	265	324	0.81	295	324	0.91	1	324	0
comp84109_c0_seq3_22	312	ref|XP_008388033.1| PREDICTED: isoflavone reductase-like protein [Malus domestica]	308	442	1138	1e-154	214	308	0.69	251	308	0.81
comp78090_c0_seq1_11	493	ref|XP_010107205.1| hypothetical protein L484_021726 [Morus notabilis]gb|EXC14229.1| hypothetical protein L484_021726 [Morus notabilis]	516	759	1959	0	371	443	0.83	403	443	0.9	15	443	0.03
comp73315_c0_seq1_57	1125	ref|XP_010095981.1| hypothetical protein L484_023970 [Morus notabilis]gb|EXB62674.1| hypothetical protein L484_023970 [Morus notabilis]	1119	1868	4838	0	882	1076	0.81	961	1076	0.89	23	1076	0.02
comp77048_c1_seq1_6	389	ref|XP_010111849.1| hypothetical protein L484_020641 [Morus notabilis]gb|EXC31814.1| hypothetical protein L484_020641 [Morus notabilis]	366	580	1494	0	282	337	0.83	298	337	0.88	4	337	0.01
comp58864_c0_seq3_37	491	ref|XP_010097057.1| UDP-sulfoquinovose synthase [Morus notabilis]gb|EXB66858.1| UDP-sulfoquinovose synthase [Morus notabilis]	485	857	2215	0	415	486	0.85	435	486	0.89	3	486	0
comp81813_c0_seq5_47	934	gb|AHI58937.1| alpha-amylase 3 [Boehmeria nivea]	765	1585	4103	0	763	765	0.99	764	765	0.99
comp87734_c0_seq1_9	299	ref|XP_010099402.1| putative xyloglucan endotransglucosylase/hydrolase protein 6 [Morusnotabilis]gb|EXB78247.1| putative xyloglucan endotransglucosylase/hydrolase protein 6 [Morusnotabilis]	290	504	1298	1e-179	229	267	0.85	249	267	0.93
comp76466_c0_seq1_9	470	ref|XP_010095945.1| Glyceraldehyde-3-phosphate dehydrogenase [Morus notabilis]gb|EXB62638.1| Glyceraldehyde-3-phosphate dehydrogenase [Morus notabilis]	440	663	1710	0	327	399	0.81	338	399	0.84	10	399	0.02
comp69390_c0_seq1_6	464	ref|XP_010103561.1| Pyruvate kinase, cytosolic isozyme [Morus notabilis]gb|EXB96338.1| Pyruvate kinase, cytosolic isozyme [Morus notabilis]	517	915	2366	0	449	471	0.95	456	471	0.96	7	471	0.01
comp83609_c0_seq1_17	313	ref|XP_010090264.1| DNA-damage-repair/toleration protein [Morus notabilis]gb|EXB39202.1| DNA-damage-repair/toleration protein [Morus notabilis]	309	450	1158	1e-157	217	302	0.71	245	302	0.81	8	302	0.02
comp75827_c0_seq1_24	317	ref|XP_007025110.1| NAD(P)-binding Rossmann-fold superfamily protein [Theobroma cacao]gb|EOY27732.1| NAD(P)-binding Rossmann-fold superfamily protein [Theobroma cacao]	353	451	1160	1e-157	223	277	0.8	245	277	0.88	2	277	0
comp75827_c0_seq1_24	317	ref|XP_007025110.1| NAD(P)-binding Rossmann-fold superfamily protein [Theobroma cacao]gb|EOY27732.1| NAD(P)-binding Rossmann-fold superfamily protein [Theobroma cacao]	353	451	1160	1e-157	223	277	0.8	245	277	0.88	2	277	0
comp71709_c0_seq1_18	363	ref|XP_010107092.1| Pectinesterase/pectinesterase inhibitor PPE8B [Morus notabilis]gb|EXC13613.1| Pectinesterase/pectinesterase inhibitor PPE8B [Morus notabilis]	1032	405	1042	1e-130	204	282	0.72	225	282	0.79	16	282	0.05
comp81383_c1_seq1_49	826	ref|XP_007050984.1| Sucrose synthase 3 isoform 1 [Theobroma cacao]gb|EOX95141.1| Sucrose synthase 3 isoform 1 [Theobroma cacao]	842	1504	3895	0	718	820	0.87	758	820	0.92
comp69265_c0_seq1_25	342	ref|XP_003633516.1| PREDICTED: cinnamoyl-CoA reductase 1 isoform X1 [Vitis vinifera]emb|CBI29103.3| unnamed protein product [Vitis vinifera]	323	486	1252	1e-171	228	326	0.69	279	326	0.85	4	326	0.01
comp83073_c0_seq2_32	530	ref|XP_010097587.1| Beta-glucosidase 44 [Morus notabilis]gb|EXB69119.1| Beta-glucosidase 44 [Morus notabilis]	512	850	2196	0	403	522	0.77	440	522	0.84	10	522	0.01
comp81007_c0_seq2_33	500	ref|XP_010106222.1| hypothetical protein L484_003380 [Morus notabilis]gb|EXC08928.1| hypothetical protein L484_003380 [Morus notabilis]	648	815	2104	0	389	495	0.78	432	495	0.87	3	495	0
comp77773_c0_seq1_10	512	ref|XP_010088030.1| Lysosomal beta glucosidase [Morus notabilis]gb|EXB31249.1| Lysosomal beta glucosidase [Morus notabilis]	634	885	2288	0	422	516	0.81	459	516	0.88	4	516	0
comp76007_c0_seq1_37	311	ref|XP_010092887.1| Acidic endochitinase [Morus notabilis]gb|EXB52705.1| Acidic endochitinase [Morus notabilis]	298	498	1282	1e-177	239	282	0.84	255	282	0.9	3	282	0.01
comp83922_c0_seq4_42	801	gb|KDP20227.1| hypothetical protein JCGZ_09859 [Jatropha curcas]	773	1105	2858	0	522	750	0.69	607	750	0.8	3	750	0
comp83413_c0_seq2_18	607	ref|XP_010090866.1| putative pectinesterase/pectinesterase inhibitor 51 [Morusnotabilis]gb|EXB40991.1| putative pectinesterase/pectinesterase inhibitor 51 [Morusnotabilis]	567	836	2160	0	404	522	0.77	437	522	0.83	8	522	0.01
comp81346_c0_seq2_16	946	ref|XP_008231241.1| PREDICTED: lysosomal alpha-mannosidase isoform X1 [Prunus mume]ref|XP_008231242.1| PREDICTED: lysosomal alpha-mannosidase isoform X1 [Prunus mume]	1024	1566	4056	0	737	914	0.8	816	914	0.89	5	914	0
comp75122_c1_seq1_7	315	ref|XP_010109574.1| Xyloglucan endotransglucosylase/hydrolase protein 9 [Morusnotabilis]gb|EXC23178.1| Xyloglucan endotransglucosylase/hydrolase protein 9 [Morusnotabilis]	291	522	1344	0	238	269	0.88	257	269	0.95	1	269	0
comp83522_c1_seq2_10	518	ref|XP_010111634.1| Glucose-6-phosphate 1-dehydrogenase, cytoplasmic isoform 2 [Morusnotabilis]gb|EXC31379.1| Glucose-6-phosphate 1-dehydrogenase, cytoplasmic isoform 2 [Morusnotabilis]	517	986	2549	0	475	517	0.91	494	517	0.95
comp80861_c1_seq1_21	347	ref|XP_010095033.1| UDP-glucuronic acid decarboxylase 1 [Morus notabilis]gb|EXB58139.1| UDP-glucuronic acid decarboxylase 1 [Morus notabilis]	346	700	1806	0	336	346	0.97	342	346	0.98
comp83808_c1_seq1_28	405	ref|XP_010091822.1| hypothetical protein L484_015891 [Morus notabilis]gb|EXB46030.1| hypothetical protein L484_015891 [Morus notabilis]	399	651	1680	0	318	399	0.79	341	399	0.85	3	399	0
comp85262_c0_seq1_13	533	ref|XP_010107898.1| UDP-glucose flavonoid 3-O-glucosyltransferase 7 [Morus notabilis]gb|EXC17298.1| UDP-glucose flavonoid 3-O-glucosyltransferase 7 [Morus notabilis]	464	671	1732	0	319	465	0.68	372	465	0.8	1	465	0
comp69025_c0_seq2_25	330	ref|XP_010090892.1| putative 6-phosphogluconolactonase 4 [Morus notabilis]gb|EXB41097.1| putative 6-phosphogluconolactonase 4 [Morus notabilis]	323	445	1144	1e-155	225	278	0.8	238	278	0.85	3	278	0.01
comp86959_c0_seq1_67	1439	ref|XP_010100417.1| Alpha-glucan water dikinase [Morus notabilis]gb|EXB82551.1| Alpha-glucan water dikinase [Morus notabilis]	1436	2174	5632	0	1084	1468	0.73	1202	1468	0.81	90	1468	0.06
comp63305_c1_seq1_6	321	ref|XP_010090286.1| Triosephosphate isomerase [Morus notabilis]gb|EXB39256.1| Triosephosphate isomerase [Morus notabilis]	324	513	1320	0	254	310	0.81	276	310	0.89	11	310	0.03
comp7779_c0_seq1_5	228	emb|CDP11390.1| unnamed protein product [Coffea canephora]	340	369	946	1e-126	177	230	0.76	194	230	0.84	6	230	0.02
comp68842_c0_seq1_13	574	ref|XP_010099150.1| Pyrophosphate--fructose 6-phosphate 1-phosphotransferase subunitbeta [Morus notabilis]gb|EXB77022.1| Pyrophosphate--fructose 6-phosphate 1-phosphotransferase subunitbeta [Morus notabilis]	565	1001	2588	0	487	565	0.86	511	565	0.9	1	565	0
comp81211_c1_seq1_22	352	ref|XP_010088704.1| hypothetical protein L484_016490 [Morus notabilis]gb|EXB36885.1| hypothetical protein L484_016490 [Morus notabilis]	321	526	1355	0	249	319	0.78	275	319	0.86	7	319	0.02
comp74215_c0_seq3_14	488	ref|XP_010092933.1| Glucose-6-phosphate 1-dehydrogenase 4 [Morus notabilis]gb|EXB52986.1| Glucose-6-phosphate 1-dehydrogenase 4 [Morus notabilis]	643	745	1924	0	379	502	0.75	409	502	0.81	35	502	0.06
comp27750_c0_seq2_7	165	ref|XP_007202700.1| hypothetical protein PRUPE_ppa012689mg [Prunus persica]gb|EMJ03899.1| hypothetical protein PRUPE_ppa012689mg [Prunus persica]	158	239	611	3e-79	116	158	0.73	127	158	0.8	1	158	0
comp66034_c0_seq1_17	286	gb|AFR46580.2| xyloglucan endotransglucosylase/hydrolase 12 [Rosa x borboniana]	281	462	1188	1e-163	219	256	0.85	238	256	0.92	3	256	0.01
comp83607_c1_seq1_10	765	ref|XP_010089398.1| 1,4-alpha-glucan-branching enzyme 2-2 [Morus notabilis]gb|EXB37751.1| 1,4-alpha-glucan-branching enzyme 2-2 [Morus notabilis]	868	1352	3500	0	634	729	0.86	689	729	0.94	2	729	0
comp27646_c0_seq1_27	436	ref|XP_007032687.1| Alpha-1,4 glucan phosphorylase L isozyme, chloroplastic/amyloplasticisoform 1 [Theobroma cacao]gb|EOY03613.1| Alpha-1,4 glucan phosphorylase L isozyme, chloroplastic/amyloplasticisoform 1 [Theobroma cacao]	1008	753	1944	0	357	412	0.86	381	412	0.92	2	412	0
comp78777_c0_seq1_8	407	ref|XP_010103336.1| hypothetical protein L484_014376 [Morus notabilis]gb|EXB95403.1| hypothetical protein L484_014376 [Morus notabilis]	403	711	1834	0	349	402	0.86	368	402	0.91	10	402	0.02
comp943910_c0_seq1_4	91	gb|ACU18796.1| unknown [Glycine max]	179	136	342	2e-39	70	91	0.76	74	91	0.81
comp83596_c0_seq1_34	604	ref|XP_010106609.1| hypothetical protein L484_004838 [Morus notabilis]gb|EXC10939.1| hypothetical protein L484_004838 [Morus notabilis]	590	942	2436	0	465	578	0.8	511	578	0.88	12	578	0.02
comp67591_c0_seq1_8	433	ref|XP_010098150.1| hypothetical protein L484_026284 [Morus notabilis]gb|EXB74587.1| hypothetical protein L484_026284 [Morus notabilis]	499	753	1944	0	361	433	0.83	393	433	0.9
comp66008_c0_seq2_29	191	ref|XP_002308721.1| hypothetical protein POPTR_0006s28380g [Populus trichocarpa]gb|EEE92244.1| hypothetical protein POPTR_0006s28380g [Populus trichocarpa]	288	209	531	9e-65	99	126	0.78	112	126	0.88
comp78283_c0_seq1_13	627	ref|XP_010094500.1| Pyrophosphate--fructose 6-phosphate 1-phosphotransferase subunitalpha [Morus notabilis]gb|EXB56254.1| Pyrophosphate--fructose 6-phosphate 1-phosphotransferase subunitalpha [Morus notabilis]	631	1138	2944	0	548	611	0.89	564	611	0.92	14	611	0.02
comp68398_c0_seq1_7	353	ref|XP_010099026.1| Strictosidine synthase 1 [Morus notabilis]gb|EXB76384.1| Strictosidine synthase 1 [Morus notabilis]	324	357	916	1e-120	185	323	0.57	234	323	0.72	11	323	0.03
comp39721_c0_seq1_6	341	ref|XP_010110080.1| hypothetical protein L484_004319 [Morus notabilis]gb|EXC25147.1| hypothetical protein L484_004319 [Morus notabilis]	283	392	1007	1e-134	205	310	0.66	223	310	0.71	37	310	0.11
comp4712_c0_seq1_7	77	gb|AIS82610.1| enolase [Haemaphysalis flava]	433	131	329	4e-35	62	74	0.83	68	74	0.91
comp560312_c0_seq1_33	577	ref|XP_003042663.1| hypothetical protein NECHADRAFT_81117 [Nectria haematococca mpVI77-13-4]gb|EEU36950.1| hypothetical protein NECHADRAFT_81117 [Nectria haematococca mpVI77-13-4]	564	831	2146	0	395	545	0.72	444	545	0.81
comp80222_c0_seq1_44	515	ref|XP_010090971.1| hypothetical protein L484_013631 [Morus notabilis]gb|EXB41556.1| hypothetical protein L484_013631 [Morus notabilis]	503	578	1489	0	316	515	0.61	359	515	0.69	82	515	0.15
comp80342_c0_seq1_28	427	ref|XP_010091837.1| putative sugar kinase yihV [Morus notabilis]gb|EXB46045.1| putative sugar kinase yihV [Morus notabilis]	366	490	1261	1e-170	252	377	0.66	287	377	0.76	11	377	0.02
comp68637_c0_seq1_20	391	ref|XP_004439996.1| PREDICTED: coproporphyrinogen-III oxidase, mitochondrial[Ceratotherium simum simum]	350	420	1079	1e-143	199	315	0.63	244	315	0.77	11	315	0.03
comp77476_c0_seq1_10	488	ref|XP_010093929.1| Glutamate-1-semialdehyde 2,1-aminomutase 1 [Morus notabilis]gb|EXB54892.1| Glutamate-1-semialdehyde 2,1-aminomutase 1 [Morus notabilis]	476	817	2111	0	399	462	0.86	419	462	0.9	1	462	0
comp66652_c0_seq1_13	396	ref|XP_002520842.1| uroporphyrinogen decarboxylase, putative [Ricinus communis]gb|EEF41551.1| uroporphyrinogen decarboxylase, putative [Ricinus communis]	389	639	1649	0	308	360	0.85	332	360	0.92
comp85659_c2_seq2_9	434	ref|XP_010095403.1| Delta-aminolevulinic acid dehydratase [Morus notabilis]gb|EXB60095.1| Delta-aminolevulinic acid dehydratase [Morus notabilis]	430	717	1850	0	355	431	0.82	369	431	0.85	1	431	0
comp39650_c0_seq2_17	397	ref|XP_004287066.1| PREDICTED: glycerate dehydrogenase-like [Fragaria vesca subsp.vesca]	386	711	1834	0	339	380	0.89	354	380	0.93
comp87096_c0_seq1_10	431	ref|XP_010108425.1| Magnesium-chelatase subunit chlI [Morus notabilis]gb|EXC19453.1| Magnesium-chelatase subunit chlI [Morus notabilis]	418	693	1788	0	358	422	0.84	374	422	0.88	4	422	0
comp87877_c0_seq1_27	341	ref|XP_010102651.1| Heterodimeric geranylgeranyl pyrophosphate synthase small subunit[Morus notabilis]gb|EXB93813.1| Heterodimeric geranylgeranyl pyrophosphate synthase small subunit[Morus notabilis]	338	527	1357	0	273	341	0.8	296	341	0.86	3	341	0
comp79161_c0_seq1_7	414	ref|XP_010112535.1| Porphobilinogen deaminase [Morus notabilis]gb|EXC33988.1| Porphobilinogen deaminase [Morus notabilis]	380	662	1707	0	332	381	0.87	358	381	0.93	8	381	0.02
comp78543_c0_seq2_24	375	ref|XP_009368820.1| PREDICTED: NADH-cytochrome b5 reductase-like protein [Pyrus xbretschneideri]	324	550	1417	0	264	324	0.81	289	324	0.89	4	324	0.01
comp82623_c0_seq1_21	370	ref|XP_009800853.1| PREDICTED: hydroxyphenylpyruvate reductase-like [Nicotianasylvestris]	313	497	1279	1e-175	234	313	0.74	271	313	0.86
comp79420_c1_seq1_11	558	ref|XP_010091434.1| Protoporphyrinogen oxidase [Morus notabilis]gb|EXB44471.1| Protoporphyrinogen oxidase [Morus notabilis]	546	782	2020	0	389	474	0.82	412	474	0.86	2	474	0
comp82936_c0_seq2_26	404	ref|XP_002961973.1| hypothetical protein SELMODRAFT_164791 [Selaginella moellendorffii]ref|XP_002971113.1| hypothetical protein SELMODRAFT_267476 [Selaginella moellendorffii]ref|XP_002994729.1| hypothetical protein SELMODRAFT_139062 [Selaginella moellendorffii]gb|EFJ04207.1| hypothetical protein SELMODRAFT_139062 [Selaginella moellendorffii]gb|EFJ27711.1| hypothetical protein SELMODRAFT_267476 [S…	393	578	1490	0	285	386	0.73	316	386	0.81	5	386	0.01
comp85100_c0_seq1_46	573	emb|CBI34027.3| unnamed protein product [Vitis vinifera]	845	931	2405	0	452	558	0.81	498	558	0.89	3	558	0
comp85100_c0_seq1_46	573	emb|CBI34027.3| unnamed protein product [Vitis vinifera]	845	931	2405	0	452	558	0.81	498	558	0.89	3	558	0
comp100725_c0_seq1_20	347	ref|XP_002950429.1| hypothetical protein VOLCADRAFT_74602 [Volvox carteri f.nagariensis]gb|EFJ48630.1| hypothetical protein VOLCADRAFT_74602 [Volvox carteri f.nagariensis]	483	554	1427	0	263	322	0.81	285	322	0.88
comp63366_c0_seq1_21	432	ref|XP_010266695.1| PREDICTED: phosphoserine aminotransferase 1, chloroplastic-like[Nelumbo nucifera]	429	670	1728	0	311	382	0.81	343	382	0.89
comp62305_c0_seq1_19	343	ref|XP_002318168.2| hypothetical protein POPTR_0012s10840g [Populus trichocarpa]gb|EEE96388.2| hypothetical protein POPTR_0012s10840g [Populus trichocarpa]	317	457	1176	1e-159	228	324	0.7	259	324	0.79	14	324	0.04
comp60478_c1_seq2_7	372	gb|ADI46913.1| METM1m [Volvox carteri f. nagariensis]	390	556	1433	0	262	374	0.7	304	374	0.81	2	374	0
comp74466_c0_seq1_37	589	ref|XP_008244478.1| PREDICTED: ketol-acid reductoisomerase, chloroplastic [Prunus mume]	588	1003	2592	0	481	566	0.84	513	566	0.9	4	566	0
comp76647_c0_seq1_11	608	ref|XP_004496955.1| PREDICTED: d-3-phosphoglycerate dehydrogenase, chloroplastic-likeisoform X1 [Cicer arietinum]ref|XP_004496956.1| PREDICTED: d-3-phosphoglycerate dehydrogenase, chloroplastic-likeisoform X2 [Cicer arietinum]	596	929	2401	0	462	553	0.83	488	553	0.88
comp81976_c0_seq1_59	1116	ref|XP_010089531.1| Ubiquitin-activating enzyme E1 2 [Morus notabilis]gb|EXB37970.1| Ubiquitin-activating enzyme E1 2 [Morus notabilis]	1093	2035	5272	0	985	1094	0.9	1017	1094	0.92	3	1094	0
comp81478_c0_seq1_19	471	ref|XP_006446210.1| hypothetical protein CICLE_v100143612mg, partial [Citrusclementina]gb|ESR59450.1| hypothetical protein CICLE_v100143612mg, partial [Citrusclementina]	605	705	1820	0	363	471	0.77	378	471	0.8	1	471	0
comp81478_c0_seq1_19	471	ref|XP_006446210.1| hypothetical protein CICLE_v100143612mg, partial [Citrusclementina]gb|ESR59450.1| hypothetical protein CICLE_v100143612mg, partial [Citrusclementina]	605	705	1820	0	363	471	0.77	378	471	0.8	1	471	0
comp79005_c0_seq2_27	516	ref|XP_010112184.1| hypothetical protein L484_009550 [Morus notabilis]gb|EXC32850.1| hypothetical protein L484_009550 [Morus notabilis]	489	659	1699	0	321	494	0.64	381	494	0.77	18	494	0.03
comp94943_c0_seq1_28	399	ref|XP_010100371.1| GDSL esterase/lipase [Morus notabilis]gb|EXB82505.1| GDSL esterase/lipase [Morus notabilis]	386	570	1468	0	278	385	0.72	309	385	0.8	13	385	0.03
comp62296_c0_seq1_20	346	ref|XP_008236533.1| PREDICTED: probable carboxylesterase 12 [Prunus mume]	318	352	904	1e-118	186	326	0.57	223	326	0.68	14	326	0.04
comp74178_c0_seq1_10	396	ref|XP_010095107.1| GDSL esterase/lipase [Morus notabilis]gb|EXB58273.1| GDSL esterase/lipase [Morus notabilis]	386	555	1431	0	260	360	0.72	305	360	0.84	1	360	0
comp41097_c0_seq1_24	385	ref|XP_010107961.1| putative carboxylesterase 13 [Morus notabilis]gb|EXC17361.1| putative carboxylesterase 13 [Morus notabilis]	319	526	1354	0	257	320	0.8	284	320	0.88	5	320	0.01
comp75231_c0_seq3_25	359	ref|XP_008218450.1| PREDICTED: isopentenyl-diphosphate Delta-isomerase I [Prunus mume]	299	448	1152	1e-156	220	266	0.82	231	266	0.86	3	266	0.01
comp78556_c0_seq2_24	404	ref|XP_009365138.1| PREDICTED: GDSL esterase/lipase At2g04570 [Pyrus x bretschneideri]	349	518	1334	0	238	330	0.72	280	330	0.84
comp83708_c0_seq1_13	527	gb|AFD33352.1| acyl-activating enzyme 8 [Cannabis sativa]	526	843	2178	0	411	527	0.77	457	527	0.86	4	527	0
comp83708_c0_seq1_13	527	gb|AFD33352.1| acyl-activating enzyme 8 [Cannabis sativa]	526	843	2178	0	411	527	0.77	457	527	0.86	4	527	0
comp64043_c0_seq1_10	494	ref|XP_006467495.1| PREDICTED: 3-oxoacyl-[acyl-carrier-protein] synthase I,chloroplastic-like [Citrus sinensis]gb|KDO78133.1| hypothetical protein CISIN_1g012221mg [Citrus sinensis]	468	825	2132	0	405	469	0.86	426	469	0.9	2	469	0
comp80254_c0_seq2_9	497	gb|ADD31604.1| acetyl-CoA carboxylase carboxyltransferase beta subunit protein(chloroplast) [Ficus sp. Moore 315]	497	870	2248	0	421	493	0.85	451	493	0.91	2	493	0
comp75375_c0_seq1_53	815	ref|XP_010097235.1| Phospholipase D alpha 1 [Morus notabilis]gb|EXB67302.1| Phospholipase D alpha 1 [Morus notabilis]	808	1458	3775	0	687	810	0.84	753	810	0.92	3	810	0
comp82626_c0_seq11_4	276	ref|XP_010104812.1| Momilactone A synthase [Morus notabilis]gb|EXC01953.1| Momilactone A synthase [Morus notabilis]	275	437	1124	1e-153	211	275	0.76	236	275	0.85
comp72734_c0_seq1_24	295	ref|XP_010038361.1| PREDICTED: biotin carboxyl carrier protein of acetyl-CoAcarboxylase 1, chloroplastic [Eucalyptus grandis]gb|KCW84589.1| hypothetical protein EUGRSUZ_B01425 [Eucalyptus grandis]	279	231	588	7e-72	134	250	0.53	151	250	0.6	5	250	0.02
comp39320_c0_seq1_11	128	ref|XP_002303469.1| acyl-CoA-binding family protein [Populus trichocarpa]gb|EEE78448.1| acyl-CoA-binding family protein [Populus trichocarpa]	90	150	378	3e-45	73	90	0.81	75	90	0.83
comp79687_c0_seq2_8	416	ref|XP_010093814.1| 4-diphosphocytidyl-2-C-methyl-D-erythritol kinase [Morus notabilis]gb|EXB54665.1| 4-diphosphocytidyl-2-C-methyl-D-erythritol kinase [Morus notabilis]	455	587	1513	0	307	396	0.77	331	396	0.83	3	396	0
comp90042_c0_seq1_32	384	ref|XP_010095110.1| GDSL esterase/lipase [Morus notabilis]gb|EXB58276.1| GDSL esterase/lipase [Morus notabilis]	375	604	1558	0	299	383	0.78	323	383	0.84	15	383	0.03
comp85136_c0_seq3_9	411	gb|AGW24283.1| chalcone synthase [Melastoma malabathricum]	391	733	1892	0	350	389	0.89	367	389	0.94
comp80791_c1_seq1_6	263	ref|XP_004296616.1| PREDICTED: carnitinyl-CoA dehydratase-like [Fragaria vesca subsp.vesca]	243	184	468	9e-55	109	246	0.44	128	246	0.52	9	246	0.03
comp72730_c0_seq1_7	365	ref|XP_010092937.1| GDSL esterase/lipase [Morus notabilis]gb|EXB52990.1| GDSL esterase/lipase [Morus notabilis]	364	569	1467	0	280	342	0.81	305	342	0.89	2	342	0
comp75806_c0_seq1_22	299	ref|XP_007219267.1| hypothetical protein PRUPE_ppa018232mg [Prunus persica]gb|EMJ20466.1| hypothetical protein PRUPE_ppa018232mg [Prunus persica]	298	409	1050	1e-141	203	295	0.68	238	295	0.8	9	295	0.03
comp69273_c0_seq1_5	303	ref|XP_010276407.1| PREDICTED: short-chain type dehydrogenase/reductase-like [Nelumbonucifera]	268	402	1033	1e-139	199	271	0.73	227	271	0.83	5	271	0.01
comp54784_c0_seq1_5	683	ref|XP_010087270.1| Long chain acyl-CoA synthetase 4 [Morus notabilis]gb|EXB28672.1| Long chain acyl-CoA synthetase 4 [Morus notabilis]	670	1210	3130	0	582	667	0.87	626	667	0.93	8	667	0.01
comp84648_c0_seq1_15	732	ref|XP_010088352.1| Long chain acyl-CoA synthetase 8 [Morus notabilis]gb|EXB34470.1| Long chain acyl-CoA synthetase 8 [Morus notabilis]	763	1241	3210	0	591	729	0.81	649	729	0.89	3	729	0
comp226741_c0_seq1_49	765	ref|XP_001689874.1| cycloartenol synthase [Chlamydomonas reinhardtii]gb|EDP09612.1| cycloartenol synthase [Chlamydomonas reinhardtii]	762	1042	2695	0	510	744	0.68	583	744	0.78	17	744	0.02
comp80343_c0_seq1_40	472	ref|XP_003555870.1| PREDICTED: diphosphomevalonate decarboxylase-like [Glycine max]	421	721	1862	0	340	423	0.8	377	423	0.89	2	423	0
comp80611_c0_seq1_11	458	ref|XP_008242591.1| PREDICTED: 3-hydroxyisobutyryl-CoA hydrolase-like protein 3,mitochondrial isoform X1 [Prunus mume]	422	676	1743	0	319	385	0.82	354	385	0.91
comp73105_c0_seq1_52	753	ref|XP_010098198.1| 4-hydroxy-3-methylbut-2-en-1-yl diphosphate synthase [Morusnotabilis]gb|EXB74654.1| 4-hydroxy-3-methylbut-2-en-1-yl diphosphate synthase [Morusnotabilis]	978	1398	3618	0	675	747	0.9	697	747	0.93
comp77047_c0_seq1_39	488	ref|XP_010108051.1| Hydroxymethylglutaryl-CoA synthase [Morus notabilis]gb|EXC17783.1| Hydroxymethylglutaryl-CoA synthase [Morus notabilis]	467	860	2221	0	410	467	0.87	434	467	0.92	7	467	0.01
comp68786_c0_seq1_6	260	ref|XP_008218908.1| PREDICTED: uncharacterized protein LOC103319171 [Prunus mume]	234	329	843	1e-112	162	201	0.8	176	201	0.87	8	201	0.03
comp83973_c1_seq1_25	365	ref|XP_009348744.1| PREDICTED: GDSL esterase/lipase At5g03610-like [Pyrus xbretschneideri]	357	480	1235	1e-168	234	321	0.72	274	321	0.85	4	321	0.01
comp74478_c0_seq1_11	522	ref|XP_010099126.1| 3-ketoacyl-CoA thiolase 2 [Morus notabilis]gb|EXB76920.1| 3-ketoacyl-CoA thiolase 2 [Morus notabilis]	464	720	1858	0	357	421	0.84	364	421	0.86
comp17236_c0_seq1_5	168	ref|XP_002956223.1| hypothetical protein VOLCADRAFT_83516 [Volvox carteri f.nagariensis]gb|EFJ42762.1| hypothetical protein VOLCADRAFT_83516 [Volvox carteri f.nagariensis]	376	293	751	2e-97	138	168	0.82	157	168	0.93
comp73939_c0_seq2_5	145	ref|XP_009347736.1| PREDICTED: beta-Amyrin Synthase 1-like [Pyrus x bretschneideri]	216	231	590	2e-75	108	139	0.77	116	139	0.83
comp69261_c0_seq1_9	434	ref|XP_010060532.1| PREDICTED: protochlorophyllide reductase, chloroplastic [Eucalyptusgrandis]gb|KCW67312.1| hypothetical protein EUGRSUZ_F01098 [Eucalyptus grandis]	398	687	1772	0	335	398	0.84	356	398	0.89
comp74779_c0_seq1_8	320	ref|XP_008454823.1| PREDICTED: 40S ribosomal protein S4-3 [Cucumis melo]ref|XP_008454824.1| PREDICTED: 40S ribosomal protein S4-3 [Cucumis melo]	264	512	1319	0	244	256	0.95	254	256	0.99
comp193829_c0_seq1_7	68	gb|AAR09998.1| similar to Drosophila melanogaster CG2998, partial [Drosophilayakuba]gb|AAR10159.1| similar to Drosophila melanogaster CG2998, partial [Drosophilayakuba]	58	99	245	2e-26	48	51	0.94	50	51	0.98
comp69315_c0_seq1_5	149	ref|XP_002266030.2| PREDICTED: 60S acidic ribosomal protein P2 isoform X1 [Vitisvinifera]emb|CBI17057.3| unnamed protein product [Vitis vinifera]	145	111	278	5e-29	56	67	0.83	61	67	0.91
comp73838_c0_seq1_7	314	ref|XP_002524859.1| ribosomal protein L5, putative [Ricinus communis]gb|EEF37483.1| ribosomal protein L5, putative [Ricinus communis]	299	457	1175	1e-160	224	289	0.77	239	289	0.82
comp81258_c0_seq1_16	239	ref|XP_008387136.1| PREDICTED: 40S ribosomal protein S5-like [Malus domestica]	208	387	994	1e-135	187	206	0.9	194	206	0.94
comp57363_c0_seq1_26	186	ref|XP_008644390.1| PREDICTED: 40S ribosomal protein S23-like [Zea mays]	192	288	736	2e-97	140	151	0.92	145	151	0.96
comp79696_c0_seq1_14	438	ref|XP_009415521.1| PREDICTED: eukaryotic initiation factor 4A-15 [Musa acuminatasubsp. malaccensis]	413	820	2117	0	392	413	0.94	406	413	0.98
comp38825_c0_seq1_23	297	ref|XP_006444963.1| hypothetical protein CICLE_v10021696mg [Citrus clementina]ref|XP_006491177.1| PREDICTED: 50S ribosomal protein L5, chloroplastic-like [Citrussinensis]gb|ESR58203.1| hypothetical protein CICLE_v10021696mg [Citrus clementina]	267	401	1030	1e-139	193	254	0.75	221	254	0.87	6	254	0.02
comp95557_c0_seq1_18	238	gb|KDP41204.1| hypothetical protein JCGZ_15611 [Jatropha curcas]	221	230	586	3e-73	112	204	0.54	147	204	0.72	7	204	0.03
comp87079_c0_seq1_7	270	ref|XP_002954737.1| component of cytosolic 80S ribosome and 60S large subunit [Volvoxcarteri f. nagariensis]gb|EFJ44143.1| component of cytosolic 80S ribosome and 60S large subunit [Volvoxcarteri f. nagariensis]	232	382	982	1e-132	179	227	0.78	197	227	0.86
comp74440_c0_seq2_19	208	ref|XP_010503548.1| PREDICTED: 60S ribosomal protein L13-1 [Camelina sativa]ref|XP_010515238.1| PREDICTED: 60S ribosomal protein L13-1 [Camelina sativa]	206	369	946	1e-128	175	194	0.9	187	194	0.96
comp82049_c0_seq4_37	466	gb|ABA12218.1| translation elongation factor 1A-2 [Gossypium hirsutum]gb|KHG05237.1| Elongation factor 1-alpha [Gossypium arboreum]	447	909	2348	0	438	447	0.97	443	447	0.99
comp44858_c0_seq1_3	99	gb|ACF86701.1| unknown [Zea mays]	106	179	454	4e-57	85	99	0.85	92	99	0.92
comp87246_c0_seq1_15	745	ref|XP_004152844.1| PREDICTED: glycine--tRNA ligase 1, mitochondrial-like [Cucumissativus]gb|KGN61223.1| hypothetical protein Csa_2G070890 [Cucumis sativus]	729	1218	3152	0	574	689	0.83	633	689	0.91	3	689	0
comp61744_c0_seq1_2	201	ref|XP_002958222.1| component of cytosolic 80S ribosome and 40S small subunit [Volvoxcarteri f. nagariensis]gb|EFJ40676.1| component of cytosolic 80S ribosome and 40S small subunit [Volvoxcarteri f. nagariensis]	190	258	660	2e-85	124	182	0.68	153	182	0.84	1	182	0
comp85183_c1_seq2_20	799	ref|XP_010093664.1| Elongation factor G [Morus notabilis]gb|EXB54444.1| Elongation factor G [Morus notabilis]	788	1415	3663	0	705	789	0.89	729	789	0.92	6	789	0
comp79772_c0_seq1_6	561	ref|XP_010105757.1| Proline--tRNA ligase [Morus notabilis]gb|EXC05977.1| Proline--tRNA ligase [Morus notabilis]	583	1001	2587	0	487	558	0.87	506	558	0.9	5	558	0
comp73550_c0_seq1_18	235	ref|XP_008379631.1| PREDICTED: 50S ribosomal protein L6, chloroplastic-like [Malusdomestica]ref|XP_008365451.1| PREDICTED: 50S ribosomal protein L6, chloroplastic-like [Malusdomestica]	226	419	1078	1e-148	204	226	0.9	215	226	0.95
comp79318_c0_seq1_18	767	ref|XP_010094933.1| DEAD-box ATP-dependent RNA helicase 3 [Morus notabilis]gb|EXB57576.1| DEAD-box ATP-dependent RNA helicase 3 [Morus notabilis]	810	1059	2739	0	552	661	0.83	574	661	0.86	15	661	0.02
comp88294_c0_seq1_3	332	ref|XP_004134699.1| PREDICTED: 30S ribosomal protein S5, chloroplastic-like [Cucumissativus]ref|XP_004155560.1| PREDICTED: 30S ribosomal protein S5, chloroplastic-like [Cucumissativus]	307	312	800	1e-103	159	218	0.72	171	218	0.78	1	218	0
comp77578_c0_seq1_48	849	ref|XP_006422199.1| hypothetical protein CICLE_v10004309mg [Citrus clementina]ref|XP_006490495.1| PREDICTED: elongation factor 2-like [Citrus sinensis]gb|ESR35439.1| hypothetical protein CICLE_v10004309mg [Citrus clementina]gb|KDO46718.1| hypothetical protein CISIN_1g003165mg [Citrus sinensis]gb|KDO46719.1| hypothetical protein CISIN_1g003165mg [Citrus sinensis]	843	1722	4460	0	818	843	0.97	835	843	0.99
comp74641_c0_seq1_18	201	ref|XP_010097616.1| Extracellular ribonuclease LE [Morus notabilis]gb|EXB69695.1| Extracellular ribonuclease LE [Morus notabilis]	228	385	989	1e-135	178	201	0.88	191	201	0.95
comp59492_c0_seq1_5	183	ref|XP_001785869.1| predicted protein [Physcomitrella patens]gb|EDQ49322.1| predicted protein [Physcomitrella patens]	186	259	662	3e-86	131	176	0.74	147	176	0.83	1	176	0
comp78960_c0_seq2_21	314	ref|XP_002279311.2| PREDICTED: 50S ribosomal protein L15, chloroplastic [Vitisvinifera]emb|CBI27014.3| unnamed protein product [Vitis vinifera]	262	340	872	1e-115	180	255	0.7	200	255	0.78	8	255	0.03
comp83554_c0_seq1_15	167	ref|XP_002522429.1| 60S ribosomal protein L34, putative [Ricinus communis]gb|EEF39921.1| 60S ribosomal protein L34, putative [Ricinus communis]	120	196	497	3e-62	95	95	1	95	95	1
comp76534_c0_seq1_39	682	ref|XP_010101088.1| DEAD-box ATP-dependent RNA helicase 37 [Morus notabilis]gb|EXB86900.1| DEAD-box ATP-dependent RNA helicase 37 [Morus notabilis]	612	848	2192	0	411	436	0.94	423	436	0.97	1	436	0
comp79888_c0_seq1_34	511	ref|XP_004287445.1| PREDICTED: uncharacterized protein LOC101312281 [Fragaria vescasubsp. vesca]	1023	817	2111	0	415	479	0.86	445	479	0.92	5	479	0.01
comp88463_c0_seq1_15	307	ref|XP_008460096.1| PREDICTED: 50S ribosomal protein L3, chloroplastic [Cucumis melo]	293	391	1004	1e-134	191	211	0.9	204	211	0.96
comp67362_c0_seq2_35	419	ref|XP_010098556.1| Obg-like ATPase 1 [Morus notabilis]gb|EXB75216.1| Obg-like ATPase 1 [Morus notabilis]	394	790	2041	0	380	394	0.96	387	394	0.98
comp85817_c0_seq1_14	142	ref|XP_004296381.1| PREDICTED: 60S ribosomal protein L14-2-like [Fragaria vesca subsp.vesca]	133	228	582	1e-75	116	133	0.87	119	133	0.89
comp14968_c0_seq1_2	125	ref|XP_004519374.1| PREDICTED: ubiquitin-40S ribosomal protein S27a-like [Ceratitiscapitata]	156	186	471	1e-58	92	125	0.73	92	125	0.73
comp80004_c0_seq1_14	226	ref|XP_007201344.1| hypothetical protein PRUPE_ppa012001mg [Prunus persica]ref|XP_008235116.1| PREDICTED: 60S ribosomal protein L18-2 [Prunus mume]gb|EMJ02543.1| hypothetical protein PRUPE_ppa012001mg [Prunus persica]	187	367	943	1e-128	181	187	0.96	186	187	0.99
comp81709_c8_seq2_23	869	ref|XP_010105960.1| Multiple C2 and transmembrane domain-containing protein 1 [Morusnotabilis]gb|EXC06842.1| Multiple C2 and transmembrane domain-containing protein 1 [Morusnotabilis]	1006	894	2310	0	435	551	0.78	479	551	0.86	4	551	0
comp307494_c0_seq1_7	265	ref|XP_007016138.1| Ribosomal protein L10 family protein [Theobroma cacao]gb|EOY33757.1| Ribosomal protein L10 family protein [Theobroma cacao]	321	283	725	2e-92	146	219	0.66	161	219	0.73
comp61885_c0_seq1_3	117	ref|XP_008371599.1| PREDICTED: 40S ribosomal protein S14-3 isoform X1 [Malus domestica]ref|XP_008358615.1| PREDICTED: 40S ribosomal protein S14-3 [Malus domestica]ref|XP_009360878.1| PREDICTED: 40S ribosomal protein S14-3 isoform X1 [Pyrus xbretschneideri]	150	184	466	4e-58	91	106	0.85	94	106	0.88
comp75531_c0_seq1_9	429	ref|XP_006433295.1| hypothetical protein CICLE_v10001213mg [Citrus clementina]ref|XP_006471976.1| PREDICTED: amidase 1-like isoform X2 [Citrus sinensis]gb|ESR46535.1| hypothetical protein CICLE_v10001213mg [Citrus clementina]	431	634	1634	0	299	424	0.7	351	424	0.82	1	424	0
comp84472_c0_seq1_34	670	ref|XP_010094205.1| Lysine--tRNA ligase [Morus notabilis]gb|EXB55381.1| Lysine--tRNA ligase [Morus notabilis]	672	1015	2624	0	482	550	0.87	513	550	0.93	1	550	0
comp79008_c0_seq1_16	244	ref|XP_010093817.1| Elongation factor 1-beta 1 [Morus notabilis]gb|EXB54668.1| Elongation factor 1-beta 1 [Morus notabilis]	222	296	759	2e-99	155	227	0.68	164	227	0.72	5	227	0.02
comp78880_c0_seq2_12	204	gb|AAF34799.1|AF227979_1 40S ribosomal protein S16 [Euphorbia esula]	144	280	716	1e-94	136	139	0.97	137	139	0.98
comp54158_c0_seq1_19	280	ref|XP_004141698.1| PREDICTED: 40S ribosomal protein S3-3-like [Cucumis sativus]ref|XP_004167885.1| PREDICTED: 40S ribosomal protein S3-3-like [Cucumis sativus]	236	461	1187	1e-164	225	236	0.95	229	236	0.97
comp27660_c0_seq1_9	122	ref|XP_004133785.1| PREDICTED: 40S ribosomal protein S6-like [Cucumis sativus]ref|XP_004155185.1| PREDICTED: 40S ribosomal protein S6-like [Cucumis sativus]gb|KGN56379.1| hypothetical protein Csa_3G118140 [Cucumis sativus]	250	231	589	3e-75	119	122	0.97	121	122	0.99
comp67458_c0_seq1_34	344	ref|XP_004138372.1| PREDICTED: 40S ribosomal protein SA-like [Cucumis sativus]gb|KGN45883.1| hypothetical protein Csa_6G016990 [Cucumis sativus]	308	449	1156	1e-157	225	276	0.81	236	276	0.85	8	276	0.02
comp30213_c0_seq1_6	123	ref|XP_008487718.1| PREDICTED: 40S ribosomal protein S25 isoform X1 [Diaphorina citri]ref|XP_008487720.1| PREDICTED: 40S ribosomal protein S25 isoform X2 [Diaphorina citri]gb|ABG81982.1| putative ribosomal protein S25 [Diaphorina citri]	120	153	386	4e-46	83	119	0.69	88	119	0.73	1	119	0
comp59510_c0_seq1_44	743	ref|XP_008460557.1| PREDICTED: threonine--tRNA ligase, mitochondrial [Cucumis melo]	724	1271	3290	0	596	670	0.88	632	670	0.94
comp69108_c0_seq1_5	129	ref|XP_010087922.1| 60S ribosomal protein L3 [Morus notabilis]gb|EXB30757.1| 60S ribosomal protein L3 [Morus notabilis]	389	243	621	4e-78	116	120	0.96	118	120	0.98
comp3964_c0_seq1_8	362	gb|EPZ31169.1| Mannose-1-phosphate guanyltransferase [Rozella allomycis CSF55]	360	532	1371	0	244	361	0.67	311	361	0.86	1	361	0
comp85558_c1_seq1_38	439	ref|XP_010090939.1| Eukaryotic peptide chain release factor subunit 1-3 [Morusnotabilis]gb|EXB41424.1| Eukaryotic peptide chain release factor subunit 1-3 [Morusnotabilis]	437	888	2295	0	428	437	0.97	434	437	0.99
comp27829_c0_seq1_6	218	ref|XP_004304630.1| PREDICTED: 50S ribosomal protein L12, chloroplastic-like [Fragariavesca subsp. vesca]	187	195	496	2e-60	117	192	0.6	132	192	0.68	5	192	0.02
comp35936_c0_seq1_9	148	gb|KDR23361.1| 40S ribosomal protein S13 [Zootermopsis nevadensis]	151	277	708	2e-94	136	148	0.91	142	148	0.95
comp31721_c0_seq1_10	486	ref|XP_009356734.1| PREDICTED: elongation factor Tu, mitochondrial [Pyrus xbretschneideri]	450	816	2108	0	398	450	0.88	416	450	0.92	1	450	0
comp61847_c1_seq1_4	164	gb|KHG03722.1| 40S ribosomal S15a-1 -like protein [Gossypium arboreum]	169	270	689	5e-91	136	157	0.86	141	157	0.89	6	157	0.03
comp72602_c0_seq1_14	229	emb|CDP12186.1| unnamed protein product [Coffea canephora]	199	261	668	3e-86	127	157	0.8	140	157	0.89	3	157	0.01
comp88349_c0_seq1_34	572	ref|XP_008236208.1| PREDICTED: putative amidase C869.01 isoform X1 [Prunus mume]	519	657	1696	0	334	493	0.67	394	493	0.79	15	493	0.03
comp79451_c0_seq1_32	553	ref|XP_010107377.1| Elongation factor Ts [Morus notabilis]gb|EXC15866.1| Elongation factor Ts [Morus notabilis]	1060	550	1417	0	296	468	0.63	329	468	0.7	16	468	0.03
comp79451_c0_seq1_32	553	ref|XP_010107377.1| Elongation factor Ts [Morus notabilis]gb|EXC15866.1| Elongation factor Ts [Morus notabilis]	1060	550	1417	0	296	468	0.63	329	468	0.7	16	468	0.03
comp82315_c0_seq1_29	605	ref|XP_010086893.1| Asparagine--tRNA ligase, cytoplasmic 1 [Morus notabilis]gb|EXB24684.1| Asparagine--tRNA ligase, cytoplasmic 1 [Morus notabilis]	572	1096	2835	0	526	572	0.91	549	572	0.95	5	572	0
comp83405_c0_seq1_15	1202	ref|XP_010097489.1| Isoleucine--tRNA ligase [Morus notabilis]gb|EXB68680.1| Isoleucine--tRNA ligase [Morus notabilis]	1169	2072	5368	0	1000	1183	0.84	1071	1183	0.9	22	1183	0.01
comp56591_c0_seq1_4	280	ref|XP_010104677.1| 50S ribosomal protein L4 [Morus notabilis]gb|EXC01483.1| 50S ribosomal protein L4 [Morus notabilis]	293	358	920	1e-122	179	225	0.79	198	225	0.88	2	225	0
comp73677_c0_seq1_6	152	gb|AAP80667.1|AF479048_1 ribosomal Pr 117, partial [Triticum aestivum]	147	282	722	2e-96	143	151	0.94	144	151	0.95	6	151	0.03
comp54338_c0_seq1_8	274	ref|XP_010105399.1| 60S ribosomal protein L7-4 [Morus notabilis]gb|EXC04599.1| 60S ribosomal protein L7-4 [Morus notabilis]	291	392	1007	1e-135	192	244	0.78	203	244	0.83
comp83022_c0_seq2_19	305	ref|XP_010094236.1| 40S ribosomal protein S2-4 [Morus notabilis]gb|EXB55434.1| 40S ribosomal protein S2-4 [Morus notabilis]	274	460	1184	1e-162	224	233	0.96	229	233	0.98
comp76671_c1_seq1_4	165	ref|XP_007016545.1| Ribosomal L29 family protein [Theobroma cacao]gb|EOY34164.1| Ribosomal L29 family protein [Theobroma cacao]	159	189	480	3e-59	99	125	0.79	102	125	0.81
comp81164_c0_seq1_30	585	ref|XP_010095486.1| Aspartate--tRNA ligase [Morus notabilis]gb|EXB60460.1| Aspartate--tRNA ligase [Morus notabilis]	541	921	2381	0	446	508	0.87	477	508	0.93	1	508	0
comp76677_c0_seq1_5	218	ref|XP_010092158.1| hypothetical protein L484_017847 [Morus notabilis]gb|EXB50309.1| hypothetical protein L484_017847 [Morus notabilis]	187	309	791	1e-105	161	193	0.83	170	193	0.88	9	193	0.04
comp86863_c0_seq1_17	220	ref|XP_006384967.1| hypothetical protein POPTR_0004s22660g [Populus trichocarpa]gb|ABK96065.1| unknown [Populus trichocarpa]gb|ERP62764.1| hypothetical protein POPTR_0004s22660g [Populus trichocarpa]	198	251	641	3e-82	126	177	0.71	143	177	0.8
comp71820_c0_seq1_6	210	ref|XP_007025337.1| Ribosomal protein large subunit 16A [Theobroma cacao]gb|EOY27959.1| Ribosomal protein large subunit 16A [Theobroma cacao]	257	330	847	1e-113	168	207	0.81	172	207	0.83	2	207	0
comp68234_c0_seq1_7	292	ref|XP_010090259.1| 40S ribosomal protein S3a [Morus notabilis]gb|EXB39197.1| 40S ribosomal protein S3a [Morus notabilis]	262	457	1176	1e-161	219	235	0.93	223	235	0.94
comp75824_c0_seq3_34	238	ref|XP_010087847.1| Glutamyl-tRNA(Gln) amidotransferase subunit A [Morus notabilis]gb|EXB30283.1| Glutamyl-tRNA(Gln) amidotransferase subunit A [Morus notabilis]	528	236	601	9e-72	112	147	0.76	127	147	0.86
comp27581_c0_seq1_2	107	ref|XP_010106630.1| Eukaryotic translation initiation factor 5A-2 [Morus notabilis]gb|EXC11009.1| Eukaryotic translation initiation factor 5A-2 [Morus notabilis]	160	196	497	9e-63	91	95	0.95	93	95	0.97
comp278507_c0_seq1_11	204	gb|ABV65294.1| ribosomal protein S4 (chloroplast) [Ficus sp. Moore 315]	201	382	981	1e-134	190	201	0.94	195	201	0.97
comp71563_c0_seq1_15	184	ref|XP_006387417.1| 60S ribosomal protein L18a-1 [Populus trichocarpa]gb|ABK93213.1| unknown [Populus trichocarpa]gb|ABK94632.1| unknown [Populus trichocarpa]gb|ERP46331.1| 60S ribosomal protein L18a-1 [Populus trichocarpa]	178	361	927	1e-127	170	178	0.95	175	178	0.98
comp30957_c0_seq1_12	165	ref|XP_001693454.1| ribosomal protein L17, component of cytosolic 80S ribosome and 60Slarge subunit [Chlamydomonas reinhardtii]gb|EDP08708.1| ribosomal protein L17 [Chlamydomonas reinhardtii]	186	209	531	1e-66	95	138	0.68	108	138	0.78
comp67617_c0_seq2_5	191	ref|XP_002305397.1| 40S ribosomal protein S19 [Populus trichocarpa]gb|EEE85908.1| 40S ribosomal protein S19 [Populus trichocarpa]	143	287	735	6e-98	134	143	0.93	141	143	0.98
comp2747_c0_seq1_2	79	ref|XP_001998438.1| GI23964 [Drosophila mojavensis]ref|XP_002060215.1| ribosomal protein L15 [Drosophila virilis]gb|ABD90549.1| ribosomal protein large subunit 15 [Drosophila virilis]gb|ABD90552.1| ribosomal protein large subunit 15 [Drosophila virilis]gb|EDW13899.1| GI23964 [Drosophila mojavensis]gb|EDW58212.1| ribosomal protein L15 [Drosophila virilis]	204	121	303	2e-33	63	78	0.8	63	78	0.8
comp81885_c0_seq1_12	524	ref|XP_010108960.1| Eukaryotic translation initiation factor 2 subunit 3 [Morusnotabilis]gb|EXC20600.1| Eukaryotic translation initiation factor 2 subunit 3 [Morusnotabilis]	464	936	2420	0	453	464	0.97	462	464	0.99
comp81885_c0_seq1_12	524	ref|XP_010108960.1| Eukaryotic translation initiation factor 2 subunit 3 [Morusnotabilis]gb|EXC20600.1| Eukaryotic translation initiation factor 2 subunit 3 [Morusnotabilis]	464	936	2420	0	453	464	0.97	462	464	0.99
comp81885_c0_seq1_12	524	ref|XP_010108960.1| Eukaryotic translation initiation factor 2 subunit 3 [Morusnotabilis]gb|EXC20600.1| Eukaryotic translation initiation factor 2 subunit 3 [Morusnotabilis]	464	936	2420	0	453	464	0.97	462	464	0.99
comp159_c0_seq1_3	67	ref|XP_002956194.1| chloroplast elongation factor G [Volvox carteri f. nagariensis]gb|EFJ42733.1| chloroplast elongation factor G [Volvox carteri f. nagariensis]	775	131	330	2e-34	62	67	0.92	63	67	0.94
comp67499_c0_seq1_15	253	ref|XP_010542112.1| PREDICTED: 50S ribosomal protein L11, chloroplastic [Tarenayahassleriana]	225	282	722	1e-93	135	144	0.93	143	144	0.99
comp41264_c0_seq2_47	772	emb|CAN74586.1| hypothetical protein VITISV_041989 [Vitis vinifera]	771	1120	2896	0	568	777	0.73	614	777	0.79	12	777	0.01
comp67566_c0_seq1_7	276	ref|XP_009352593.1| PREDICTED: 60S ribosomal protein L6-like isoform X1 [Pyrus xbretschneideri]	233	330	845	1e-112	169	233	0.72	178	233	0.76
comp756_c0_seq1_9	178	ref|XP_004534738.1| PREDICTED: 60S ribosomal protein L12-like [Ceratitis capitata]	165	323	827	1e-112	159	165	0.96	162	165	0.98
comp56065_c0_seq1_6	202	ref|XP_008437538.1| PREDICTED: 60S ribosomal protein L9 [Cucumis melo]gb|ADN33776.1| 60S ribosomal protein l9 [Cucumis melo subsp. melo]	194	369	948	1e-129	179	194	0.92	190	194	0.97
comp38608_c0_seq1_15	243	ref|XP_004300076.1| PREDICTED: 30S ribosomal protein S9, chloroplastic-like [Fragariavesca subsp. vesca]	209	277	708	7e-92	143	188	0.76	155	188	0.82	6	188	0.03
comp69128_c0_seq1_51	1005	ref|XP_010112290.1| Alanine--tRNA ligase [Morus notabilis]gb|EXC33093.1| Alanine--tRNA ligase [Morus notabilis]	906	1629	4218	0	786	905	0.86	832	905	0.91	2	905	0
comp82616_c0_seq2_10	171	ref|XP_001628997.1| predicted protein [Nematostella vectensis]gb|EDO36934.1| predicted protein [Nematostella vectensis]	153	221	562	9e-72	101	135	0.74	124	135	0.91	4	135	0.02
comp77808_c0_seq1_13	612	ref|XP_008240148.1| PREDICTED: outer envelope protein 64, chloroplastic [Prunus mume]	590	875	2260	0	438	590	0.74	487	590	0.82
comp79696_c0_seq1_14	438	ref|XP_009415521.1| PREDICTED: eukaryotic initiation factor 4A-15 [Musa acuminatasubsp. malaccensis]	413	820	2117	0	392	413	0.94	406	413	0.98
comp44858_c0_seq1_3	99	gb|ACF86701.1| unknown [Zea mays]	106	179	454	4e-57	85	99	0.85	92	99	0.92
comp82370_c1_seq1_53	1027	ref|XP_010109186.1| putative receptor protein kinase TMK1 [Morus notabilis]gb|EXC21214.1| putative receptor protein kinase TMK1 [Morus notabilis]	956	1350	3494	0	676	938	0.72	734	938	0.78	7	938	0
comp79318_c0_seq1_18	767	ref|XP_010094933.1| DEAD-box ATP-dependent RNA helicase 3 [Morus notabilis]gb|EXB57576.1| DEAD-box ATP-dependent RNA helicase 3 [Morus notabilis]	810	1059	2739	0	552	661	0.83	574	661	0.86	15	661	0.02
comp76534_c0_seq1_39	682	ref|XP_010101088.1| DEAD-box ATP-dependent RNA helicase 37 [Morus notabilis]gb|EXB86900.1| DEAD-box ATP-dependent RNA helicase 37 [Morus notabilis]	612	848	2192	0	411	436	0.94	423	436	0.97	1	436	0
comp87390_c0_seq1_16	639	ref|XP_010095584.1| Probably inactive leucine-rich repeat receptor-like protein kinase[Morus notabilis]gb|EXB61157.1| Probably inactive leucine-rich repeat receptor-like protein kinase[Morus notabilis]	602	968	2503	0	467	622	0.75	525	622	0.84	24	622	0.03
comp83339_c0_seq1_71	1288	ref|XP_010089232.1| Serine/threonine-protein kinase [Morus notabilis]gb|EXB37530.1| Serine/threonine-protein kinase [Morus notabilis]	1232	1614	4179	0	848	1291	0.65	951	1291	0.73	75	1291	0.05
comp81292_c0_seq1_47	708	ref|XP_010098027.1| putative inactive receptor kinase [Morus notabilis]gb|EXB74410.1| putative inactive receptor kinase [Morus notabilis]	711	989	2557	0	500	668	0.74	539	668	0.8	2	668	0
comp3564_c0_seq1_4	109	ref|XP_010093477.1| L-type lectin-domain containing receptor kinase IX.1 [Morusnotabilis]gb|EXB54101.1| L-type lectin-domain containing receptor kinase IX.1 [Morusnotabilis]	685	163	412	2e-45	75	109	0.68	87	109	0.79	2	109	0.01
comp79451_c0_seq1_32	553	ref|XP_010107377.1| Elongation factor Ts [Morus notabilis]gb|EXC15866.1| Elongation factor Ts [Morus notabilis]	1060	550	1417	0	296	468	0.63	329	468	0.7	16	468	0.03
comp30171_c0_seq1_75	633	ref|XP_001755358.1| predicted protein [Physcomitrella patens]gb|EDQ79838.1| predicted protein [Physcomitrella patens]	582	512	1318	1e-173	274	572	0.47	354	572	0.61	31	572	0.05
comp4999_c0_seq2_7	346	ref|XP_001697865.1| mitogen-activated protein kinase 7 [Chlamydomonas reinhardtii]gb|EDO99748.1| mitogen-activated protein kinase 7 [Chlamydomonas reinhardtii]	301	478	1231	1e-168	220	299	0.73	256	299	0.85	2	299	0
comp81975_c0_seq1_9	507	ref|XP_010098022.1| Serine/threonine-protein kinase STN8 [Morus notabilis]gb|EXB74405.1| Serine/threonine-protein kinase STN8 [Morus notabilis]	497	757	1955	0	382	510	0.74	422	510	0.82	17	510	0.03
comp86350_c0_seq1_31	364	ref|XP_010091414.1| Pto-interacting protein 1 [Morus notabilis]gb|EXB44451.1| Pto-interacting protein 1 [Morus notabilis]	665	690	1781	0	330	362	0.91	342	362	0.94
comp69269_c0_seq1_28	1451	ref|XP_010095988.1| E3 ubiquitin-protein ligase KEG [Morus notabilis]gb|EXB62681.1| E3 ubiquitin-protein ligase KEG [Morus notabilis]	1645	2633	6826	0	1306	1462	0.89	1372	1462	0.93	17	1462	0.01
comp85227_c0_seq1_25	993	ref|XP_010102407.1| Probably inactive leucine-rich repeat receptor-like protein kinase[Morus notabilis]gb|EXB93392.1| Probably inactive leucine-rich repeat receptor-like protein kinase[Morus notabilis]	975	1224	3167	0	649	981	0.66	745	981	0.75	32	981	0.03
comp81516_c0_seq1_88	996	ref|XP_010113026.1| putative leucine-rich repeat receptor-like protein kinase [Morusnotabilis]gb|EXC35197.1| putative leucine-rich repeat receptor-like protein kinase [Morusnotabilis]	964	1493	3864	0	732	968	0.75	831	968	0.85	8	968	0
comp41264_c0_seq2_47	772	emb|CAN74586.1| hypothetical protein VITISV_041989 [Vitis vinifera]	771	1120	2896	0	568	777	0.73	614	777	0.79	12	777	0.01
comp83636_c0_seq1_22	900	ref|XP_010099328.1| Receptor-like protein kinase FERONIA [Morus notabilis]gb|EXB77674.1| Receptor-like protein kinase FERONIA [Morus notabilis]	867	961	2485	0	520	886	0.58	628	886	0.7	64	886	0.07
comp79780_c0_seq2_8	284	ref|XP_010110999.1| hypothetical protein L484_021695 [Morus notabilis]gb|EXC29385.1| hypothetical protein L484_021695 [Morus notabilis]	277	486	1250	1e-172	233	252	0.92	243	252	0.96
comp77110_c1_seq1_13	423	gb|AEV89968.1| mitogen activated protein kinase [Humulus lupulus]	380	722	1864	0	348	380	0.91	361	380	0.95	3	380	0
comp83698_c0_seq1_24	1004	ref|XP_010099530.1| nuclease domain-containing protein 1 [Morus notabilis]gb|EXB79410.1| nuclease domain-containing protein 1 [Morus notabilis]	986	1588	4111	0	792	997	0.79	860	997	0.86	17	997	0.01
comp79696_c0_seq1_14	438	ref|XP_009415521.1| PREDICTED: eukaryotic initiation factor 4A-15 [Musa acuminatasubsp. malaccensis]	413	820	2117	0	392	413	0.94	406	413	0.98
comp44858_c0_seq1_3	99	gb|ACF86701.1| unknown [Zea mays]	106	179	454	4e-57	85	99	0.85	92	99	0.92
comp82370_c1_seq1_53	1027	ref|XP_010109186.1| putative receptor protein kinase TMK1 [Morus notabilis]gb|EXC21214.1| putative receptor protein kinase TMK1 [Morus notabilis]	956	1350	3494	0	676	938	0.72	734	938	0.78	7	938	0
comp79318_c0_seq1_18	767	ref|XP_010094933.1| DEAD-box ATP-dependent RNA helicase 3 [Morus notabilis]gb|EXB57576.1| DEAD-box ATP-dependent RNA helicase 3 [Morus notabilis]	810	1059	2739	0	552	661	0.83	574	661	0.86	15	661	0.02
comp76534_c0_seq1_39	682	ref|XP_010101088.1| DEAD-box ATP-dependent RNA helicase 37 [Morus notabilis]gb|EXB86900.1| DEAD-box ATP-dependent RNA helicase 37 [Morus notabilis]	612	848	2192	0	411	436	0.94	423	436	0.97	1	436	0
comp87390_c0_seq1_16	639	ref|XP_010095584.1| Probably inactive leucine-rich repeat receptor-like protein kinase[Morus notabilis]gb|EXB61157.1| Probably inactive leucine-rich repeat receptor-like protein kinase[Morus notabilis]	602	968	2503	0	467	622	0.75	525	622	0.84	24	622	0.03
comp83339_c0_seq1_71	1288	ref|XP_010089232.1| Serine/threonine-protein kinase [Morus notabilis]gb|EXB37530.1| Serine/threonine-protein kinase [Morus notabilis]	1232	1614	4179	0	848	1291	0.65	951	1291	0.73	75	1291	0.05
comp81292_c0_seq1_47	708	ref|XP_010098027.1| putative inactive receptor kinase [Morus notabilis]gb|EXB74410.1| putative inactive receptor kinase [Morus notabilis]	711	989	2557	0	500	668	0.74	539	668	0.8	2	668	0
comp3564_c0_seq1_4	109	ref|XP_010093477.1| L-type lectin-domain containing receptor kinase IX.1 [Morusnotabilis]gb|EXB54101.1| L-type lectin-domain containing receptor kinase IX.1 [Morusnotabilis]	685	163	412	2e-45	75	109	0.68	87	109	0.79	2	109	0.01
comp30171_c0_seq1_75	633	ref|XP_001755358.1| predicted protein [Physcomitrella patens]gb|EDQ79838.1| predicted protein [Physcomitrella patens]	582	512	1318	1e-173	274	572	0.47	354	572	0.61	31	572	0.05
comp4999_c0_seq2_7	346	ref|XP_001697865.1| mitogen-activated protein kinase 7 [Chlamydomonas reinhardtii]gb|EDO99748.1| mitogen-activated protein kinase 7 [Chlamydomonas reinhardtii]	301	478	1231	1e-168	220	299	0.73	256	299	0.85	2	299	0
comp81975_c0_seq1_9	507	ref|XP_010098022.1| Serine/threonine-protein kinase STN8 [Morus notabilis]gb|EXB74405.1| Serine/threonine-protein kinase STN8 [Morus notabilis]	497	757	1955	0	382	510	0.74	422	510	0.82	17	510	0.03
comp86350_c0_seq1_31	364	ref|XP_010091414.1| Pto-interacting protein 1 [Morus notabilis]gb|EXB44451.1| Pto-interacting protein 1 [Morus notabilis]	665	690	1781	0	330	362	0.91	342	362	0.94
comp69269_c0_seq1_28	1451	ref|XP_010095988.1| E3 ubiquitin-protein ligase KEG [Morus notabilis]gb|EXB62681.1| E3 ubiquitin-protein ligase KEG [Morus notabilis]	1645	2633	6826	0	1306	1462	0.89	1372	1462	0.93	17	1462	0.01
comp85227_c0_seq1_25	993	ref|XP_010102407.1| Probably inactive leucine-rich repeat receptor-like protein kinase[Morus notabilis]gb|EXB93392.1| Probably inactive leucine-rich repeat receptor-like protein kinase[Morus notabilis]	975	1224	3167	0	649	981	0.66	745	981	0.75	32	981	0.03
comp81516_c0_seq1_88	996	ref|XP_010113026.1| putative leucine-rich repeat receptor-like protein kinase [Morusnotabilis]gb|EXC35197.1| putative leucine-rich repeat receptor-like protein kinase [Morusnotabilis]	964	1493	3864	0	732	968	0.75	831	968	0.85	8	968	0
comp41264_c0_seq2_47	772	emb|CAN74586.1| hypothetical protein VITISV_041989 [Vitis vinifera]	771	1120	2896	0	568	777	0.73	614	777	0.79	12	777	0.01
comp83636_c0_seq1_22	900	ref|XP_010099328.1| Receptor-like protein kinase FERONIA [Morus notabilis]gb|EXB77674.1| Receptor-like protein kinase FERONIA [Morus notabilis]	867	961	2485	0	520	886	0.58	628	886	0.7	64	886	0.07
comp77110_c1_seq1_13	423	gb|AEV89968.1| mitogen activated protein kinase [Humulus lupulus]	380	722	1864	0	348	380	0.91	361	380	0.95	3	380	0
comp74948_c0_seq1_11	396	ref|XP_010092951.1| hypothetical protein L484_018888 [Morus notabilis]gb|EXB53004.1| hypothetical protein L484_018888 [Morus notabilis]	380	692	1787	0	338	381	0.88	355	381	0.93	1	381	0
comp74948_c0_seq1_11	396	ref|XP_010092951.1| hypothetical protein L484_018888 [Morus notabilis]gb|EXB53004.1| hypothetical protein L484_018888 [Morus notabilis]	380	692	1787	0	338	381	0.88	355	381	0.93	1	381	0
comp74948_c0_seq1_11	396	ref|XP_010092951.1| hypothetical protein L484_018888 [Morus notabilis]gb|EXB53004.1| hypothetical protein L484_018888 [Morus notabilis]	380	692	1787	0	338	381	0.88	355	381	0.93	1	381	0
comp79756_c0_seq1_20	348	ref|XP_008223104.1| PREDICTED: uncharacterized protein LOC103322925 isoform X2 [Prunusmume]	338	485	1249	1e-170	237	340	0.69	270	340	0.79	12	340	0.03
comp79756_c0_seq1_20	348	ref|XP_008223104.1| PREDICTED: uncharacterized protein LOC103322925 isoform X2 [Prunusmume]	338	485	1249	1e-170	237	340	0.69	270	340	0.79	12	340	0.03
comp66481_c0_seq1_10	409	ref|XP_007030576.1| GDP-mannose 3,5-epimerase 1 [Theobroma cacao]gb|EOY11078.1| GDP-mannose 3,5-epimerase 1 [Theobroma cacao]	426	753	1944	0	357	384	0.92	364	384	0.94
comp86214_c1_seq1_27	323	ref|XP_004142064.1| PREDICTED: uncharacterized protein At2g37660, chloroplastic-like[Cucumis sativus]gb|KGN54259.1| hypothetical protein Csa_4G296130 [Cucumis sativus]	326	491	1263	1e-173	251	335	0.74	276	335	0.82	23	335	0.06
comp83282_c0_seq1_48	808	ref|XP_010107074.1| Sucrose synthase [Morus notabilis]gb|EXC13595.1| Sucrose synthase [Morus notabilis]	806	1588	4112	0	762	806	0.94	782	806	0.97
comp62697_c0_seq1_11	237	ref|XP_010104108.1| hypothetical protein L484_014391 [Morus notabilis]gb|EXB98549.1| hypothetical protein L484_014391 [Morus notabilis]	250	231	590	1e-73	112	148	0.75	128	148	0.86
comp84461_c0_seq2_14	358	ref|XP_010089056.1| putative polygalacturonase [Morus notabilis]gb|EXB37303.1| putative polygalacturonase [Morus notabilis]	466	689	1778	0	325	358	0.9	345	358	0.96
comp83103_c0_seq1_9	361	ref|XP_010102363.1| hypothetical protein L484_015312 [Morus notabilis]gb|EXB93324.1| hypothetical protein L484_015312 [Morus notabilis]	328	557	1436	0	265	324	0.81	295	324	0.91	1	324	0
comp84109_c0_seq3_22	312	ref|XP_008388033.1| PREDICTED: isoflavone reductase-like protein [Malus domestica]	308	442	1138	1e-154	214	308	0.69	251	308	0.81
comp58864_c0_seq3_37	491	ref|XP_010097057.1| UDP-sulfoquinovose synthase [Morus notabilis]gb|EXB66858.1| UDP-sulfoquinovose synthase [Morus notabilis]	485	857	2215	0	415	486	0.85	435	486	0.89	3	486	0
comp58864_c0_seq3_37	491	ref|XP_010097057.1| UDP-sulfoquinovose synthase [Morus notabilis]gb|EXB66858.1| UDP-sulfoquinovose synthase [Morus notabilis]	485	857	2215	0	415	486	0.85	435	486	0.89	3	486	0
comp58864_c0_seq3_37	491	ref|XP_010097057.1| UDP-sulfoquinovose synthase [Morus notabilis]gb|EXB66858.1| UDP-sulfoquinovose synthase [Morus notabilis]	485	857	2215	0	415	486	0.85	435	486	0.89	3	486	0
comp58864_c0_seq3_37	491	ref|XP_010097057.1| UDP-sulfoquinovose synthase [Morus notabilis]gb|EXB66858.1| UDP-sulfoquinovose synthase [Morus notabilis]	485	857	2215	0	415	486	0.85	435	486	0.89	3	486	0
comp75827_c0_seq1_24	317	ref|XP_007025110.1| NAD(P)-binding Rossmann-fold superfamily protein [Theobroma cacao]gb|EOY27732.1| NAD(P)-binding Rossmann-fold superfamily protein [Theobroma cacao]	353	451	1160	1e-157	223	277	0.8	245	277	0.88	2	277	0
comp75827_c0_seq1_24	317	ref|XP_007025110.1| NAD(P)-binding Rossmann-fold superfamily protein [Theobroma cacao]gb|EOY27732.1| NAD(P)-binding Rossmann-fold superfamily protein [Theobroma cacao]	353	451	1160	1e-157	223	277	0.8	245	277	0.88	2	277	0
comp3964_c0_seq1_8	362	gb|EPZ31169.1| Mannose-1-phosphate guanyltransferase [Rozella allomycis CSF55]	360	532	1371	0	244	361	0.67	311	361	0.86	1	361	0
comp71080_c0_seq1_13	719	ref|XP_010106532.1| Protein TOC75-3 [Morus notabilis]gb|EXC10708.1| Protein TOC75-3 [Morus notabilis]	826	1355	3507	0	643	690	0.93	671	690	0.97
comp81383_c1_seq1_49	826	ref|XP_007050984.1| Sucrose synthase 3 isoform 1 [Theobroma cacao]gb|EOX95141.1| Sucrose synthase 3 isoform 1 [Theobroma cacao]	842	1504	3895	0	718	820	0.87	758	820	0.92
comp69265_c0_seq1_25	342	ref|XP_003633516.1| PREDICTED: cinnamoyl-CoA reductase 1 isoform X1 [Vitis vinifera]emb|CBI29103.3| unnamed protein product [Vitis vinifera]	323	486	1252	1e-171	228	326	0.69	279	326	0.85	4	326	0.01
comp76498_c0_seq1_30	529	gb|KHG12061.1| Exo-poly-alpha-D-galacturonosidase [Gossypium arboreum]	474	666	1719	0	323	458	0.7	371	458	0.81	9	458	0.01
comp77138_c0_seq1_7	351	ref|XP_007021424.1| Nucleotide-diphospho-sugar transferases superfamily protein isoform1 [Theobroma cacao]ref|XP_007021425.1| Nucleotide-diphospho-sugar transferases superfamily protein isoform1 [Theobroma cacao]ref|XP_007021426.1| Nucleotide-diphospho-sugar transferases superfamily protein isoform1 [Theobroma cacao]gb|EOY12949.1| Nucleotide-diphospho-sugar transferases superfamily protein isofor…	301	502	1292	1e-177	239	280	0.85	252	280	0.9
comp80861_c1_seq1_21	347	ref|XP_010095033.1| UDP-glucuronic acid decarboxylase 1 [Morus notabilis]gb|EXB58139.1| UDP-glucuronic acid decarboxylase 1 [Morus notabilis]	346	700	1806	0	336	346	0.97	342	346	0.98
comp83808_c1_seq1_28	405	ref|XP_010091822.1| hypothetical protein L484_015891 [Morus notabilis]gb|EXB46030.1| hypothetical protein L484_015891 [Morus notabilis]	399	651	1680	0	318	399	0.79	341	399	0.85	3	399	0
comp75806_c0_seq1_22	299	ref|XP_007219267.1| hypothetical protein PRUPE_ppa018232mg [Prunus persica]gb|EMJ20466.1| hypothetical protein PRUPE_ppa018232mg [Prunus persica]	298	409	1050	1e-141	203	295	0.68	238	295	0.8	9	295	0.03
comp73899_c0_seq1_70	1062	ref|XP_010112056.1| putative sucrose-phosphate synthase 4 [Morus notabilis]gb|EXC32475.1| putative sucrose-phosphate synthase 4 [Morus notabilis]	1307	1696	4393	0	832	1035	0.8	899	1035	0.86	26	1035	0.02
comp78666_c0_seq2_17	476	ref|XP_010094123.1| putative polygalacturonase [Morus notabilis]gb|EXC39742.1| putative polygalacturonase [Morus notabilis]	476	714	1844	0	347	438	0.79	376	438	0.85	3	438	0
comp81211_c1_seq1_22	352	ref|XP_010088704.1| hypothetical protein L484_016490 [Morus notabilis]gb|EXB36885.1| hypothetical protein L484_016490 [Morus notabilis]	321	526	1355	0	249	319	0.78	275	319	0.86	7	319	0.02
comp78777_c0_seq1_8	407	ref|XP_010103336.1| hypothetical protein L484_014376 [Morus notabilis]gb|EXB95403.1| hypothetical protein L484_014376 [Morus notabilis]	403	711	1834	0	349	402	0.86	368	402	0.91	10	402	0.02
comp793931_c0_seq1_5	193	ref|WP_024712426.1| membrane protein [Xanthomonas oryzae]	169	72	175	8e-13	57	183	0.31	87	183	0.47	24	183	0.13
comp83596_c0_seq1_34	604	ref|XP_010106609.1| hypothetical protein L484_004838 [Morus notabilis]gb|EXC10939.1| hypothetical protein L484_004838 [Morus notabilis]	590	942	2436	0	465	578	0.8	511	578	0.88	12	578	0.02
comp56811_c0_seq1_34	569	ref|XP_010088493.1| hypothetical protein L484_013698 [Morus notabilis]gb|EXB36263.1| hypothetical protein L484_013698 [Morus notabilis]	618	786	2031	0	412	567	0.72	438	567	0.77	31	567	0.05
comp66008_c0_seq2_29	191	ref|XP_002308721.1| hypothetical protein POPTR_0006s28380g [Populus trichocarpa]gb|EEE92244.1| hypothetical protein POPTR_0006s28380g [Populus trichocarpa]	288	209	531	9e-65	99	126	0.78	112	126	0.88
comp84004_c1_seq1_11	575	ref|XP_010097705.1| Phospholipase C 3 [Morus notabilis]gb|EXB70660.1| Phospholipase C 3 [Morus notabilis]	527	901	2328	0	423	528	0.8	473	528	0.89	4	528	0
comp80222_c0_seq1_44	515	ref|XP_010090971.1| hypothetical protein L484_013631 [Morus notabilis]gb|EXB41556.1| hypothetical protein L484_013631 [Morus notabilis]	503	578	1489	0	316	515	0.61	359	515	0.69	82	515	0.15
comp85205_c1_seq2_38	710	gb|KDP44981.1| hypothetical protein JCGZ_01481 [Jatropha curcas]	648	1217	3150	0	589	618	0.95	600	618	0.97
comp80231_c0_seq1_36	729	ref|XP_010095881.1| Stromal 70 kDa heat shock-related protein [Morus notabilis]gb|EXB62431.1| Stromal 70 kDa heat shock-related protein [Morus notabilis]	707	1141	2952	0	597	710	0.84	607	710	0.85	23	710	0.03
comp68905_c0_seq1_28	477	ref|XP_010654248.1| PREDICTED: ribulose bisphosphate carboxylase/oxygenase activase,chloroplastic isoform X2 [Vitis vinifera]	437	759	1959	0	365	438	0.83	391	438	0.89	4	438	0
comp78163_c0_seq2_15	603	ref|XP_010094358.1| RuBisCO large subunit-binding protein subunit beta [Morusnotabilis]gb|EXB55869.1| RuBisCO large subunit-binding protein subunit beta [Morusnotabilis]	769	1069	2765	0	542	599	0.9	556	599	0.92
comp60257_c0_seq1_26	528	ref|XP_010095405.1| Protein disulfide-isomerase [Morus notabilis]gb|EXB60097.1| Protein disulfide-isomerase [Morus notabilis]	502	771	1991	0	376	493	0.76	425	493	0.86	3	493	0
comp69405_c0_seq1_30	595	ref|XP_010109474.1| RuBisCO large subunit-binding protein subunit alpha [Morusnotabilis]gb|EXC22885.1| RuBisCO large subunit-binding protein subunit alpha [Morusnotabilis]	585	1004	2596	0	511	574	0.89	525	574	0.91
comp85850_c0_seq1_10	205	gb|ACF48822.1| cyclophilin [Gossypium hirsutum]	173	312	799	1e-107	150	172	0.87	156	172	0.9
comp74090_c1_seq2_21	784	ref|XP_010093626.1| Subtilisin-like protease [Morus notabilis]gb|EXB54387.1| Subtilisin-like protease [Morus notabilis]	724	962	2488	0	472	734	0.64	583	734	0.79	12	734	0.01
comp57641_c0_seq1_16	800	ref|XP_010111996.1| Subtilisin-like protease [Morus notabilis]gb|EXC32307.1| Subtilisin-like protease [Morus notabilis]	826	1140	2950	0	563	775	0.72	633	775	0.81	11	775	0.01
comp75492_c0_seq1_19	233	gb|AFK35043.1| unknown [Lotus japonicus]	216	329	843	1e-112	155	210	0.73	180	210	0.85
comp100621_c0_seq1_34	749	ref|XP_010087293.1| Subtilisin-like protease [Morus notabilis]gb|EXB28740.1| Subtilisin-like protease [Morus notabilis]	743	1191	3082	0	577	743	0.77	654	743	0.88	4	743	0
comp65814_c0_seq1_5	288	ref|XP_010112139.1| Proteasome subunit beta type-6 [Morus notabilis]gb|EXC32764.1| Proteasome subunit beta type-6 [Morus notabilis]	245	453	1165	1e-160	221	244	0.9	226	244	0.92	7	244	0.02
comp73284_c0_seq1_39	692	ref|XP_008437399.1| PREDICTED: luminal-binding protein 5 [Cucumis melo]	665	1268	3282	0	628	666	0.94	636	666	0.95	1	666	0
comp94547_c0_seq1_18	925	ref|XP_002952540.1| hypothetical protein VOLCADRAFT_75431 [Volvox carteri f.nagariensis]gb|EFJ46387.1| hypothetical protein VOLCADRAFT_75431 [Volvox carteri f.nagariensis]	915	1512	3914	0	770	922	0.83	800	922	0.86	13	922	0.01
comp86860_c0_seq1_36	600	ref|XP_010100326.1| T-complex protein 1 subunit epsilon [Morus notabilis]gb|EXB82460.1| T-complex protein 1 subunit epsilon [Morus notabilis]	550	1049	2713	0	507	550	0.92	525	550	0.95	15	550	0.02
comp71328_c0_seq1_15	718	ref|XP_010102129.1| ATP-dependent zinc metalloprotease FTSH 2 [Morus notabilis]gb|EXB92379.1| ATP-dependent zinc metalloprotease FTSH 2 [Morus notabilis]	694	1143	2957	0	581	694	0.83	591	694	0.85	1	694	0
comp59960_c0_seq1_28	357	ref|XP_010104850.1| ATP-dependent Clp protease proteolytic subunit-related protein 4[Morus notabilis]gb|EXC02086.1| ATP-dependent Clp protease proteolytic subunit-related protein 4[Morus notabilis]	307	431	1109	1e-149	212	245	0.86	222	245	0.9
comp68626_c0_seq1_20	844	ref|XP_002519502.1| Transitional endoplasmic reticulum ATPase, putative [Ricinuscommunis]gb|EEF42916.1| Transitional endoplasmic reticulum ATPase, putative [Ricinuscommunis]	805	1527	3953	0	747	805	0.92	765	805	0.95
comp65893_c0_seq1_7	236	ref|XP_010089676.1| Peroxiredoxin Q [Morus notabilis]gb|EXB38195.1| Peroxiredoxin Q [Morus notabilis]	213	324	830	1e-110	162	199	0.81	172	199	0.86	3	199	0.01
comp83028_c0_seq3_45	743	ref|XP_010108374.1| hypothetical protein L484_010382 [Morus notabilis]gb|EXC19365.1| hypothetical protein L484_010382 [Morus notabilis]	1464	921	2380	0	481	733	0.65	559	733	0.76	26	733	0.03
comp62405_c0_seq1_8	302	ref|XP_010089662.1| 20 kDa chaperonin [Morus notabilis]gb|EXB38181.1| 20 kDa chaperonin [Morus notabilis]	255	399	1026	1e-138	208	255	0.81	222	255	0.87	2	255	0
comp68994_c0_seq1_7	449	gb|KDP40615.1| hypothetical protein JCGZ_24614 [Jatropha curcas]	426	837	2163	0	407	426	0.95	411	426	0.96
comp80255_c0_seq1_18	731	ref|XP_008452941.1| PREDICTED: ATP-dependent zinc metalloprotease FTSH, chloroplastic[Cucumis melo]	715	1100	2844	0	549	605	0.9	559	605	0.92	1	605	0
comp57307_c0_seq1_5	148	ref|XP_010105685.1| Peptide methionine sulfoxide reductase [Morus notabilis]gb|EXC05716.1| Peptide methionine sulfoxide reductase [Morus notabilis]	138	249	635	2e-83	115	132	0.87	122	132	0.92
comp64951_c0_seq5_24	319	ref|XP_010653155.1| PREDICTED: uncharacterized protein LOC100251893 isoform X2 [Vitisvinifera]	294	288	737	9e-94	153	241	0.63	176	241	0.73	6	241	0.02
comp84102_c0_seq1_26	389	ref|XP_008242243.1| PREDICTED: thiol protease aleurain-like [Prunus mume]	358	599	1545	0	276	333	0.82	304	333	0.91
comp77207_c0_seq2_22	221	ref|XP_010092509.1| Thioredoxin M4 [Morus notabilis]gb|EXB51369.1| Thioredoxin M4 [Morus notabilis]	187	231	590	1e-74	124	190	0.65	136	190	0.71	16	190	0.08
comp84128_c0_seq1_69	1025	ref|XP_002300175.1| 26S proteasome regulatory subunit family protein [Populustrichocarpa]gb|EEE84980.1| 26S proteasome regulatory subunit family protein [Populustrichocarpa]	1004	1581	4094	0	792	992	0.79	824	992	0.83	6	992	0
comp84128_c0_seq1_69	1025	ref|XP_002300175.1| 26S proteasome regulatory subunit family protein [Populustrichocarpa]gb|EEE84980.1| 26S proteasome regulatory subunit family protein [Populustrichocarpa]	1004	1581	4094	0	792	992	0.79	824	992	0.83	6	992	0
comp62796_c0_seq1_41	731	ref|XP_003543129.1| PREDICTED: heat shock 70 kDa protein, mitochondrial-like [Glycinemax]	674	1239	3206	0	604	658	0.91	630	658	0.95	1	658	0
comp28330_c0_seq1_9	253	ref|XP_010094116.1| hypothetical protein L484_018133 [Morus notabilis]gb|EXB55206.1| hypothetical protein L484_018133 [Morus notabilis]	222	272	696	1e-89	147	228	0.64	167	228	0.73	12	228	0.05
comp76355_c0_seq1_9	302	ref|XP_010089118.1| putative phospholipid hydroperoxide glutathione peroxidase 6 [Morusnotabilis]gb|EXB37365.1| putative phospholipid hydroperoxide glutathione peroxidase 6 [Morusnotabilis]	237	342	878	1e-116	157	182	0.86	172	182	0.94
comp70681_c0_seq1_8	329	ref|XP_004146320.1| PREDICTED: ABC transporter I family member 6, chloroplastic-like[Cucumis sativus]ref|XP_004168676.1| PREDICTED: ABC transporter I family member 6, chloroplastic-like[Cucumis sativus]gb|KGN65462.1| hypothetical protein Csa_1G423200 [Cucumis sativus]	329	489	1260	1e-172	241	291	0.82	265	291	0.91	5	291	0.01
comp80377_c0_seq1_15	237	ref|XP_010101286.1| Glutathione S-transferase F8 [Morus notabilis]gb|EXB88221.1| Glutathione S-transferase F8 [Morus notabilis]	218	373	958	1e-130	170	216	0.78	197	216	0.91	1	216	0
comp68857_c0_seq1_9	380	ref|XP_009593712.1| PREDICTED: probable protein disulfide-isomerase A6 [Nicotianatomentosiformis]	359	586	1510	0	282	359	0.78	304	359	0.84
comp68857_c0_seq1_9	380	ref|XP_009593712.1| PREDICTED: probable protein disulfide-isomerase A6 [Nicotianatomentosiformis]	359	586	1510	0	282	359	0.78	304	359	0.84
comp73632_c0_seq1_44	557	ref|XP_010111710.1| hypothetical protein L484_006581 [Morus notabilis]gb|EXC31549.1| hypothetical protein L484_006581 [Morus notabilis]	553	684	1766	0	385	564	0.68	402	564	0.71	19	564	0.03
comp79891_c1_seq1_11	547	ref|XP_010088479.1| hypothetical protein L484_013684 [Morus notabilis]gb|EXB36249.1| hypothetical protein L484_013684 [Morus notabilis]	625	694	1791	0	380	554	0.68	415	554	0.74	22	554	0.03
comp14968_c0_seq1_2	125	ref|XP_004519374.1| PREDICTED: ubiquitin-40S ribosomal protein S27a-like [Ceratitiscapitata]	156	186	471	1e-58	92	125	0.73	92	125	0.73
comp80508_c0_seq1_27	298	ref|XP_010258373.1| PREDICTED: protease Do-like 8, chloroplastic isoform X4 [Nelumbonucifera]	352	475	1222	1e-167	235	282	0.83	258	282	0.91	2	282	0
comp86908_c0_seq1_12	577	ref|XP_010243653.1| PREDICTED: chaperonin CPN60-2, mitochondrial-like [Nelumbonucifera]	574	1085	2807	0	532	574	0.92	558	574	0.97
comp79132_c0_seq1_27	266	ref|XP_010104520.1| Phospholipid hydroperoxide glutathione peroxidase 1 [Morusnotabilis]gb|EXC01121.1| Phospholipid hydroperoxide glutathione peroxidase 1 [Morusnotabilis]	236	380	975	1e-132	193	242	0.79	203	242	0.83	9	242	0.03
comp66935_c0_seq1_18	168	ref|XP_010100791.1| FK506-binding protein 2 [Morus notabilis]gb|EXB84489.1| FK506-binding protein 2 [Morus notabilis]	152	214	545	3e-69	105	132	0.79	113	132	0.85	4	132	0.03
comp74944_c0_seq3_26	906	ref|XP_008221168.1| PREDICTED: large proline-rich protein BAG6 isoform X1 [Prunus mume]ref|XP_008221169.1| PREDICTED: large proline-rich protein BAG6 isoform X1 [Prunus mume]	945	845	2184	0	507	949	0.53	605	949	0.63	87	949	0.09
comp73761_c0_seq1_17	235	ref|XP_010092835.1| Proteasome subunit beta type-1 [Morus notabilis]gb|EXB52653.1| Proteasome subunit beta type-1 [Morus notabilis]	223	426	1096	1e-151	204	223	0.91	209	223	0.93
comp39361_c0_seq1_24	380	ref|XP_010105270.1| Cysteine proteinase 15A [Morus notabilis]gb|EXC04205.1| Cysteine proteinase 15A [Morus notabilis]	372	624	1609	0	303	349	0.86	320	349	0.91	5	349	0.01
comp82374_c0_seq1_12	586	ref|XP_010098196.1| Protein disulfide isomerase-like 1-4 [Morus notabilis]gb|EXB74652.1| Protein disulfide isomerase-like 1-4 [Morus notabilis]	583	835	2157	0	423	587	0.72	465	587	0.79	12	587	0.02
comp72520_c0_seq1_25	304	ref|XP_010111671.1| Proteasome subunit beta type-7-B [Morus notabilis]gb|EXC31416.1| Proteasome subunit beta type-7-B [Morus notabilis]	273	528	1361	0	251	273	0.91	267	273	0.97	1	273	0
comp83339_c1_seq1_55	857	ref|XP_010109992.1| Endoplasmin-like protein [Morus notabilis]gb|EXC25010.1| Endoplasmin-like protein [Morus notabilis]	1004	1321	3419	0	658	781	0.84	684	781	0.87	6	781	0
comp73309_c0_seq1_11	395	ref|XP_008230399.1| PREDICTED: ubiquitin receptor RAD23d [Prunus mume]	385	516	1328	0	267	387	0.68	284	387	0.73	8	387	0.02
comp82860_c0_seq1_45	770	ref|XP_010105478.1| Subtilisin-like protease [Morus notabilis]gb|EXC04834.1| Subtilisin-like protease [Morus notabilis]	768	1137	2942	0	553	754	0.73	611	754	0.81	1	754	0
comp75118_c0_seq1_8	333	ref|XP_008236827.1| PREDICTED: ubiquitin fusion degradation protein 1 homolog [Prunusmume]	321	515	1327	0	256	324	0.79	268	324	0.82	7	324	0.02
comp76549_c0_seq1_40	720	ref|XP_003635036.1| PREDICTED: heat shock cognate protein 80 [Vitis vinifera]	699	1217	3149	0	602	699	0.86	621	699	0.88
comp81211_c0_seq1_57	816	ref|XP_010087981.1| Subtilisin-like protease [Morus notabilis]gb|EXB30991.1| Subtilisin-like protease [Morus notabilis]	954	1450	3754	0	691	784	0.88	732	784	0.93
comp6_c0_seq1_10	152	gb|EFA83410.1| Hsc70 protein [Polysphondylium pallidum PN500]	653	279	714	9e-89	126	151	0.83	141	151	0.93
comp84447_c0_seq1_52	3680	ref|XP_010105037.1| E3 ubiquitin-protein ligase UPL2 [Morus notabilis]gb|EXC03335.1| E3 ubiquitin-protein ligase UPL2 [Morus notabilis]	3644	5917	15350	0	2955	3672	0.8	3129	3672	0.85	58	3672	0.01
comp79303_c0_seq1_5	196	ref|XP_010111095.1| Thioredoxin F-type [Morus notabilis]gb|EXC29957.1| Thioredoxin F-type [Morus notabilis]	184	250	638	2e-82	133	185	0.71	139	185	0.75	9	185	0.04
comp82980_c0_seq1_49	905	ref|XP_010112867.1| Heat shock 70 kDa protein 17 [Morus notabilis]gb|EXC35002.1| Heat shock 70 kDa protein 17 [Morus notabilis]	878	1458	3775	0	722	898	0.8	786	898	0.87	20	898	0.02
comp71287_c0_seq1_9	336	ref|XP_010104913.1| Subtilisin-like protease [Morus notabilis]gb|EXC02149.1| Subtilisin-like protease [Morus notabilis]	803	536	1381	0	257	336	0.76	283	336	0.84
comp45172_c0_seq1_21	216	ref|XP_007514205.1| thioredoxin [Bathycoccus prasinos]emb|CCO15642.1| thioredoxin [Bathycoccus prasinos]	126	160	406	1e-47	74	89	0.83	81	89	0.91
comp45172_c0_seq1_21	216	ref|XP_007514205.1| thioredoxin [Bathycoccus prasinos]emb|CCO15642.1| thioredoxin [Bathycoccus prasinos]	126	160	406	1e-47	74	89	0.83	81	89	0.91
comp83511_c0_seq3_73	1140	ref|XP_010103972.1| Ubiquitin carboxyl-terminal hydrolase 12 [Morus notabilis]gb|EXB97675.1| Ubiquitin carboxyl-terminal hydrolase 12 [Morus notabilis]	1996	2055	5324	0	986	1085	0.9	1015	1085	0.93	2	1085	0
comp83511_c0_seq3_73	1140	ref|XP_010103972.1| Ubiquitin carboxyl-terminal hydrolase 12 [Morus notabilis]gb|EXB97675.1| Ubiquitin carboxyl-terminal hydrolase 12 [Morus notabilis]	1996	2055	5324	0	986	1085	0.9	1015	1085	0.93	2	1085	0
comp68430_c0_seq1_11	477	ref|XP_010108775.1| Protease Do-like 1 [Morus notabilis]gb|EXC20290.1| Protease Do-like 1 [Morus notabilis]	457	681	1756	0	368	463	0.79	388	463	0.83	23	463	0.04
comp93708_c0_seq1_11	147	gb|KDO52425.1| hypothetical protein CISIN_1g030573mg [Citrus sinensis]	175	278	712	1e-94	136	147	0.92	143	147	0.97
comp69075_c0_seq1_20	215	ref|XP_010108325.1| Proteasome subunit beta type-2-A [Morus notabilis]gb|EXC18946.1| Proteasome subunit beta type-2-A [Morus notabilis]	205	411	1057	1e-145	196	205	0.95	202	205	0.98
comp89896_c0_seq1_15	264	ref|XP_006444641.1| hypothetical protein CICLE_v10021681mg [Citrus clementina]ref|XP_006444644.1| hypothetical protein CICLE_v10021681mg [Citrus clementina]ref|XP_006492443.1| PREDICTED: peptidyl-prolyl cis-trans isomerase CYP20-3,chloroplastic-like isoform X2 [Citrus sinensis]gb|ESR57881.1| hypothetical protein CICLE_v10021681mg [Citrus clementina]gb|ESR57884.1| hypothetical protein CICLE_v10021…	237	297	761	4e-99	144	180	0.8	156	180	0.86	2	180	0.01
comp80056_c0_seq1_12	388	ref|XP_010103115.1| Cathepsin B [Morus notabilis]gb|EXB94880.1| Cathepsin B [Morus notabilis]	342	546	1406	0	263	360	0.73	290	360	0.8	20	360	0.05
comp85344_c2_seq1_9	440	ref|XP_010110007.1| Oryzain alpha chain [Morus notabilis]gb|EXC25025.1| Oryzain alpha chain [Morus notabilis]	517	614	1583	0	290	388	0.74	323	388	0.83	2	388	0
comp12900_c0_seq1_2	107	ref|XP_002772340.1| tat-binding protein, putative [Perkinsus marinus ATCC 50983]gb|EER04156.1| tat-binding protein, putative [Perkinsus marinus ATCC 50983]	408	217	552	6e-68	103	107	0.96	106	107	0.99
comp68931_c0_seq1_19	330	ref|XP_010105479.1| Subtilisin-like protease [Morus notabilis]gb|EXC04835.1| Subtilisin-like protease [Morus notabilis]	776	419	1078	1e-139	212	339	0.62	250	339	0.73	11	339	0.03
comp61754_c0_seq1_31	412	ref|XP_010113333.1| 26S proteasome non-ATPase regulatory subunit 4 [Morus notabilis]gb|EXC35340.1| 26S proteasome non-ATPase regulatory subunit 4 [Morus notabilis]	405	566	1459	0	295	388	0.76	301	388	0.77	2	388	0
comp65285_c0_seq1_19	250	ref|XP_010064020.1| PREDICTED: proteasome subunit alpha type-6 [Eucalyptus grandis]gb|KCW71315.1| hypothetical protein EUGRSUZ_F04398 [Eucalyptus grandis]	246	478	1229	1e-170	227	238	0.95	234	238	0.98
comp76360_c1_seq2_6	292	ref|XP_010086580.1| Hypersensitive-induced response protein 1 [Morus notabilis]gb|EXB20735.1| Hypersensitive-induced response protein 1 [Morus notabilis]	286	575	1483	0	276	286	0.96	282	286	0.98
comp74168_c0_seq1_25	269	ref|XP_010088475.1| Proteasome subunit alpha type-3 [Morus notabilis]gb|EXB36245.1| Proteasome subunit alpha type-3 [Morus notabilis]	249	461	1185	1e-163	224	249	0.89	229	249	0.91
comp80307_c0_seq1_10	311	ref|XP_010099911.1| hypothetical protein L484_020098 [Morus notabilis]gb|EXB80840.1| hypothetical protein L484_020098 [Morus notabilis]	308	434	1115	1e-151	216	309	0.69	250	309	0.8	2	309	0
comp71522_c0_seq1_50	795	ref|XP_009342993.1| PREDICTED: subtilisin-like protease [Pyrus x bretschneideri]	764	889	2298	0	444	744	0.59	547	744	0.73	21	744	0.02
comp57979_c0_seq1_14	200	ref|XP_010090372.1| putative glutathione peroxidase 4 [Morus notabilis]gb|EXB39342.1| putative glutathione peroxidase 4 [Morus notabilis]	170	320	820	1e-110	154	169	0.91	162	169	0.95
comp56333_c0_seq1_16	124	ref|XP_010094824.1| Peptidyl-prolyl cis-trans isomerase FKBP12 [Morus notabilis]gb|EXB57310.1| Peptidyl-prolyl cis-trans isomerase FKBP12 [Morus notabilis]	112	219	559	1e-72	106	112	0.94	109	112	0.97
comp86339_c0_seq1_28	360	ref|XP_010095297.1| putative protein disulfide-isomerase A6 [Morus notabilis]gb|EXB59326.1| putative protein disulfide-isomerase A6 [Morus notabilis]	360	601	1549	0	290	335	0.86	318	335	0.94
comp89597_c0_seq1_5	268	ref|XP_010109003.1| Glutathione S-transferase [Morus notabilis]gb|EXC20643.1| Glutathione S-transferase [Morus notabilis]	361	404	1037	1e-139	207	283	0.73	226	283	0.79	23	283	0.08
comp73252_c0_seq1_9	288	ref|XP_010108111.1| ATP-dependent Clp protease proteolytic subunit-related protein 2[Morus notabilis]gb|EXC17843.1| ATP-dependent Clp protease proteolytic subunit-related protein 2[Morus notabilis]	289	484	1247	1e-172	237	285	0.83	249	285	0.87	1	285	0
comp74570_c0_seq1_9	430	ref|XP_002264400.1| PREDICTED: elongation factor 1-gamma-like [Vitis vinifera]ref|XP_010657965.1| PREDICTED: elongation factor 1-gamma-like [Vitis vinifera]	423	685	1768	0	334	423	0.78	355	423	0.83	3	423	0
comp74868_c0_seq1_39	551	ref|XP_008230393.1| PREDICTED: T-complex protein 1 subunit zeta [Prunus mume]	535	1061	2743	0	512	535	0.95	529	535	0.98
comp69170_c0_seq1_16	275	ref|XP_007027930.1| 2-cysteine peroxiredoxin B [Theobroma cacao]gb|EOY08432.1| 2-cysteine peroxiredoxin B [Theobroma cacao]	266	386	992	1e-133	180	194	0.92	190	194	0.97
comp4875_c0_seq1_1	192	gb|EKC28666.1| T-complex protein 1 subunit gamma [Crassostrea gigas]	580	296	757	2e-95	132	186	0.7	159	186	0.85
comp85251_c0_seq7_82	1222	ref|XP_010108347.1| Tripeptidyl-peptidase 2 [Morus notabilis]gb|EXC19138.1| Tripeptidyl-peptidase 2 [Morus notabilis]	1389	1988	5150	0	939	1066	0.88	1013	1066	0.95
comp83423_c1_seq5_25	1148	ref|XP_007217084.1| hypothetical protein PRUPE_ppa000531mg [Prunus persica]gb|EMJ18283.1| hypothetical protein PRUPE_ppa000531mg [Prunus persica]	1112	1815	4700	0	899	1124	0.79	977	1124	0.86	20	1124	0.01
comp77142_c0_seq1_5	208	ref|XP_010052542.1| PREDICTED: monothiol glutaredoxin-S15, mitochondrial-like isoformX2 [Eucalyptus grandis]gb|KCW76608.1| hypothetical protein EUGRSUZ_D00992 [Eucalyptus grandis]	170	281	720	7e-95	131	167	0.78	147	167	0.88
comp75295_c0_seq1_19	255	ref|XP_007024947.1| N-terminal nucleophile aminohydrolases (Ntn hydrolases) superfamilyprotein isoform 1 [Theobroma cacao]gb|EOY27569.1| N-terminal nucleophile aminohydrolases (Ntn hydrolases) superfamilyprotein isoform 1 [Theobroma cacao]	235	480	1235	1e-171	233	235	0.99	234	235	0.99
comp1340822_c0_seq1_12	159	ref|XP_006676815.1| hypothetical protein BATDEDRAFT_34479 [Batrachochytriumdendrobatidis JAM81]gb|EGF82847.1| hypothetical protein BATDEDRAFT_34479 [Batrachochytriumdendrobatidis JAM81]	548	263	673	1e-83	126	159	0.79	139	159	0.87
comp73150_c0_seq1_26	430	ref|XP_007222547.1| hypothetical protein PRUPE_ppa006204mg [Prunus persica]gb|EMJ23746.1| hypothetical protein PRUPE_ppa006204mg [Prunus persica]	422	716	1847	0	355	422	0.84	370	422	0.87
comp75517_c0_seq3_49	318	ref|XP_010099801.1| Chaperone surA [Morus notabilis]gb|EXB80469.1| Chaperone surA [Morus notabilis]	386	421	1083	1e-145	202	237	0.85	217	237	0.91	3	237	0.01
comp77676_c0_seq1_5	242	ref|NP_001241191.1| uncharacterized protein LOC100799919 [Glycine max]ref|XP_006589718.1| PREDICTED: proteasome subunit alpha type-5-like [Glycine max]gb|ACU21044.1| unknown [Glycine max]	237	489	1260	1e-175	236	237	0.99	237	237	1
comp61129_c0_seq1_8	335	ref|XP_010098530.1| ATP-dependent Clp protease proteolytic subunit 4 [Morus notabilis]gb|EXB75190.1| ATP-dependent Clp protease proteolytic subunit 4 [Morus notabilis]	293	434	1117	1e-151	222	297	0.74	243	297	0.81	6	297	0.02
comp59071_c0_seq1_16	395	emb|CEG64155.1| Putative T-complex protein 1 subunit eta [Rhizopus microsporus]	499	606	1563	0	288	402	0.71	348	402	0.86	7	402	0.01
comp77953_c0_seq1_41	594	ref|XP_003518226.1| PREDICTED: T-complex protein 1 subunit theta-like [Glycine max]	545	1036	2679	0	500	547	0.91	533	547	0.97	2	547	0
comp67355_c0_seq1_5	214	ref|XP_004500254.1| PREDICTED: peptidyl-prolyl cis-trans isomerase CYP20-1-like [Cicerarietinum]	204	367	941	1e-128	178	204	0.87	186	204	0.91
comp84354_c2_seq1_6	396	ref|XP_010099610.1| ATP-dependent Clp protease proteolytic subunit-related protein 1[Morus notabilis]gb|EXB80041.1| ATP-dependent Clp protease proteolytic subunit-related protein 1[Morus notabilis]	410	564	1454	0	282	381	0.74	302	381	0.79	19	381	0.04
comp54618_c0_seq1_19	242	ref|XP_008241339.1| PREDICTED: peptidyl-prolyl cis-trans isomerase FKBP16-4,chloroplastic [Prunus mume]	233	374	959	1e-130	182	234	0.77	207	234	0.88	1	234	0
comp76835_c0_seq1_6	430	ref|XP_004287702.1| PREDICTED: thioredoxin reductase 2-like [Fragaria vesca subsp.vesca]	333	468	1203	1e-162	232	329	0.7	252	329	0.76	2	329	0
comp80648_c0_seq4_8	344	ref|XP_010096098.1| Protein grpE [Morus notabilis]gb|EXB63263.1| Protein grpE [Morus notabilis]	405	402	1032	1e-136	224	343	0.65	258	343	0.75	14	343	0.04
comp84581_c0_seq2_82	934	ref|XP_007198928.1| hypothetical protein PRUPE_ppa001162mg [Prunus persica]gb|EMJ00127.1| hypothetical protein PRUPE_ppa001162mg [Prunus persica]	892	1474	3817	0	716	846	0.84	757	846	0.89
comp84581_c0_seq2_82	934	ref|XP_007198928.1| hypothetical protein PRUPE_ppa001162mg [Prunus persica]gb|EMJ00127.1| hypothetical protein PRUPE_ppa001162mg [Prunus persica]	892	1474	3817	0	716	846	0.84	757	846	0.89
comp79183_c0_seq1_62	854	gb|KDP37205.1| hypothetical protein JCGZ_06261 [Jatropha curcas]	847	1411	3653	0	685	850	0.8	745	850	0.87	12	850	0.01
comp73894_c0_seq1_7	307	ref|XP_007223366.1| hypothetical protein PRUPE_ppa007472mg [Prunus persica]gb|EMJ24565.1| hypothetical protein PRUPE_ppa007472mg [Prunus persica]	366	492	1267	1e-173	234	245	0.95	239	245	0.97
comp85889_c0_seq1_44	595	ref|XP_010100450.1| putative nucleoredoxin 1 [Morus notabilis]gb|EXB82584.1| putative nucleoredoxin 1 [Morus notabilis]	568	845	2184	0	418	571	0.73	465	571	0.81	3	571	0
comp45146_c0_seq1_3	209	gb|EYU43679.1| hypothetical protein MIMGU_mgv1a010010mg [Erythranthe guttata]	325	321	822	1e-108	146	197	0.74	168	197	0.85
comp70920_c0_seq2_14	232	emb|CAN60787.1| hypothetical protein VITISV_034533 [Vitis vinifera]	763	340	871	1e-109	165	233	0.7	196	233	0.84	4	233	0.01
comp86131_c0_seq1_9	276	ref|XP_010105786.1| Proteasome subunit beta type-5 [Morus notabilis]gb|EXC06139.1| Proteasome subunit beta type-5 [Morus notabilis]	272	493	1269	1e-176	243	272	0.89	247	272	0.9
comp79367_c0_seq1_40	568	ref|XP_010106419.1| Ubiquitin carboxyl-terminal hydrolase 24 [Morus notabilis]gb|EXC10458.1| Ubiquitin carboxyl-terminal hydrolase 24 [Morus notabilis]	564	730	1884	0	376	532	0.7	415	532	0.78	4	532	0
comp79367_c0_seq1_40	568	ref|XP_010106419.1| Ubiquitin carboxyl-terminal hydrolase 24 [Morus notabilis]gb|EXC10458.1| Ubiquitin carboxyl-terminal hydrolase 24 [Morus notabilis]	564	730	1884	0	376	532	0.7	415	532	0.78	4	532	0
comp79367_c0_seq1_40	568	ref|XP_010106419.1| Ubiquitin carboxyl-terminal hydrolase 24 [Morus notabilis]gb|EXC10458.1| Ubiquitin carboxyl-terminal hydrolase 24 [Morus notabilis]	564	730	1884	0	376	532	0.7	415	532	0.78	4	532	0
comp79780_c0_seq2_8	284	ref|XP_010110999.1| hypothetical protein L484_021695 [Morus notabilis]gb|EXC29385.1| hypothetical protein L484_021695 [Morus notabilis]	277	486	1250	1e-172	233	252	0.92	243	252	0.96
comp475652_c0_seq1_6	221	ref|XP_002951010.1| 26S proteasome regulatory complex [Volvox carteri f. nagariensis]gb|EFJ47904.1| 26S proteasome regulatory complex [Volvox carteri f. nagariensis]	396	299	766	2e-98	150	183	0.81	155	183	0.84
comp75744_c0_seq1_7	160	gb|KDP32674.1| hypothetical protein JCGZ_13672 [Jatropha curcas]	122	187	474	5e-59	85	116	0.73	100	116	0.86
comp79615_c0_seq1_26	488	ref|XP_002520408.1| chaperonin containing t-complex protein 1, delta subunit, tcpd,putative [Ricinus communis]gb|EEF41963.1| chaperonin containing t-complex protein 1, delta subunit, tcpd,putative [Ricinus communis]	533	945	2443	0	464	488	0.95	480	488	0.98
comp74570_c1_seq1_58	960	ref|XP_010112580.1| ATPase 11, plasma membrane-type [Morus notabilis]gb|EXC34215.1| ATPase 11, plasma membrane-type [Morus notabilis]	950	1618	4189	0	805	956	0.84	821	956	0.85	6	956	0
comp73216_c0_seq3_24	999	ref|XP_007011592.1| Plasma membrane ATPase 4 isoform 1 [Theobroma cacao]gb|EOY29211.1| Plasma membrane ATPase 4 isoform 1 [Theobroma cacao]	954	1696	4391	0	825	954	0.86	858	954	0.89
comp66790_c0_seq1_6	383	ref|XP_002265774.1| PREDICTED: ferredoxin--NADP reductase, leaf-type isozyme,chloroplastic [Vitis vinifera]emb|CBI17370.3| unnamed protein product [Vitis vinifera]	362	649	1675	0	325	364	0.89	343	364	0.94	8	364	0.02
comp74009_c0_seq1_24	508	ref|XP_003631925.1| PREDICTED: catalase isozyme 1-like [Vitis vinifera]	492	814	2103	0	379	467	0.81	427	467	0.91
comp82272_c0_seq1_18	604	gb|AGQ43559.1| nitrite reductase [Morus alba]	587	1055	2728	0	510	592	0.86	544	592	0.91	6	592	0.01
comp82903_c0_seq2_29	427	ref|XP_010094202.1| Plasma membrane ATPase 4 [Morus notabilis]gb|EXB55378.1| Plasma membrane ATPase 4 [Morus notabilis]	957	808	2088	0	392	427	0.91	403	427	0.94
comp79321_c1_seq1_10	122	ref|XP_010088759.1| Copper transport protein ATOX1 [Morus notabilis]gb|EXB36942.1| Copper transport protein ATOX1 [Morus notabilis]	106	125	314	2e-35	61	67	0.91	63	67	0.94
comp77503_c0_seq1_13	587	ref|XP_010102341.1| 2-oxoglutarate/malate translocator [Morus notabilis]gb|EXB93302.1| 2-oxoglutarate/malate translocator [Morus notabilis]	565	773	1995	0	412	565	0.72	436	565	0.77	4	565	0
comp68888_c0_seq1_35	544	ref|XP_010094556.1| Catalase isozyme 1 [Morus notabilis]gb|EXB56310.1| Catalase isozyme 1 [Morus notabilis]	492	972	2513	0	455	492	0.92	483	492	0.98
comp76707_c0_seq1_17	328	ref|XP_010654358.1| PREDICTED: ATPase 10, plasma membrane-type [Vitis vinifera]	949	563	1452	0	279	327	0.85	288	327	0.88
comp75440_c0_seq1_23	269	ref|XP_010095235.1| Ferritin-3 [Morus notabilis]gb|EXB59003.1| Ferritin-3 [Morus notabilis]	253	330	847	1e-112	172	269	0.63	196	269	0.72	23	269	0.08
comp81586_c0_seq1_12	497	ref|XP_010108404.1| 2-oxoglutarate/malate translocator [Morus notabilis]gb|EXC19408.1| 2-oxoglutarate/malate translocator [Morus notabilis]	565	728	1879	0	360	470	0.76	403	470	0.85
comp68253_c0_seq1_11	306	ref|XP_010109152.1| Protein Fe superoxide dismutase 1 [Morus notabilis]gb|EXC21081.1| Protein Fe superoxide dismutase 1 [Morus notabilis]	311	375	962	1e-128	186	268	0.69	206	268	0.76	21	268	0.07
comp84526_c0_seq1_27	1226	ref|XP_007220297.1| hypothetical protein PRUPE_ppa000383mg [Prunus persica]gb|EMJ21496.1| hypothetical protein PRUPE_ppa000383mg [Prunus persica]	1223	1603	4151	0	827	1227	0.67	916	1227	0.74	9	1227	0
comp77272_c0_seq6_8	422	ref|XP_010102357.1| ZmSiR protein [Morus notabilis]gb|EXB93318.1| ZmSiR protein [Morus notabilis]	690	538	1386	0	267	309	0.86	278	309	0.89	4	309	0.01
comp78543_c0_seq2_24	375	ref|XP_009368820.1| PREDICTED: NADH-cytochrome b5 reductase-like protein [Pyrus xbretschneideri]	324	550	1417	0	264	324	0.81	289	324	0.89	4	324	0.01
comp81777_c0_seq1_30	325	ref|XP_008240466.1| PREDICTED: uncharacterized protein LOC103338970 [Prunus mume]	323	469	1207	1e-164	235	326	0.72	270	326	0.82	10	326	0.03
comp84153_c0_seq1_11	630	ref|XP_007024799.1| Autoinhibited H(+)-ATPase isoform 2 [Theobroma cacao]ref|XP_007024800.1| Autoinhibited H(+)-ATPase isoform 2 [Theobroma cacao]gb|EOY27421.1| Autoinhibited H(+)-ATPase isoform 2 [Theobroma cacao]gb|EOY27422.1| Autoinhibited H(+)-ATPase isoform 2 [Theobroma cacao]	952	1170	3028	0	564	631	0.89	601	631	0.95	1	631	0
comp89159_c0_seq1_45	872	ref|XP_007225295.1| hypothetical protein PRUPE_ppa001330mg [Prunus persica]gb|EMJ26494.1| hypothetical protein PRUPE_ppa001330mg [Prunus persica]	853	1250	3234	0	603	837	0.72	706	837	0.84	10	837	0.01
comp74054_c0_seq1_9	333	ref|XP_010108776.1| Carbonic anhydrase [Morus notabilis]gb|EXC20291.1| Carbonic anhydrase [Morus notabilis]	332	515	1326	0	267	323	0.82	292	323	0.9	5	323	0.01
comp81455_c1_seq2_27	452	ref|XP_008439552.1| PREDICTED: ferredoxin--NADP reductase, root isozyme, chloroplastic[Cucumis melo]	379	696	1795	0	326	379	0.86	355	379	0.93	2	379	0
comp73377_c0_seq2_4	188	ref|XP_002532879.1| Cyanate hydratase, putative [Ricinus communis]sp|B9T3R0.1|CYNS_RICCO RecName: Full=Cyanate hydratase; Short=Cyanase; AltName:Full=Cyanate hydrolase; AltName: Full=Cyanate lyase[Ricinus communis]gb|EEF29508.1| Cyanate hydratase, putative [Ricinus communis]	164	256	654	3e-85	123	157	0.78	131	157	0.83
comp88117_c0_seq1_7	242	ref|XP_009372495.1| PREDICTED: superoxide dismutase [Cu-Zn], chloroplastic [Pyrus xbretschneideri]	220	266	680	2e-87	126	144	0.87	139	144	0.96
comp75517_c0_seq3_49	318	ref|XP_010099801.1| Chaperone surA [Morus notabilis]gb|EXB80469.1| Chaperone surA [Morus notabilis]	386	421	1083	1e-145	202	237	0.85	217	237	0.91	3	237	0.01
comp55048_c0_seq1_10	349	ref|XP_010107984.1| Peroxidase 10 [Morus notabilis]gb|EXC17384.1| Peroxidase 10 [Morus notabilis]	336	528	1359	0	251	336	0.74	288	336	0.85	1	336	0
comp76574_c0_seq1_42	615	ref|XP_010093686.1| Monocopper oxidase-like protein SKU5 [Morus notabilis]gb|EXB54466.1| Monocopper oxidase-like protein SKU5 [Morus notabilis]	591	1080	2794	0	517	591	0.87	543	591	0.91	1	591	0
comp79866_c0_seq1_10	548	ref|XP_004294725.1| PREDICTED: trans-cinnamate 4-monooxygenase-like [Fragaria vescasubsp. vesca]	504	870	2247	0	420	504	0.83	452	504	0.89
comp81554_c0_seq2_33	571	ref|XP_010101299.1| L-ascorbate oxidase-like protein [Morus notabilis]gb|EXB88234.1| L-ascorbate oxidase-like protein [Morus notabilis]	541	944	2440	0	457	542	0.84	489	542	0.9	1	542	0
comp83708_c0_seq1_13	527	gb|AFD33352.1| acyl-activating enzyme 8 [Cannabis sativa]	526	843	2178	0	411	527	0.77	457	527	0.86	4	527	0
comp64043_c0_seq1_10	494	ref|XP_006467495.1| PREDICTED: 3-oxoacyl-[acyl-carrier-protein] synthase I,chloroplastic-like [Citrus sinensis]gb|KDO78133.1| hypothetical protein CISIN_1g012221mg [Citrus sinensis]	468	825	2132	0	405	469	0.86	426	469	0.9	2	469	0
comp83322_c0_seq1_14	497	ref|XP_010089462.1| Allene oxide synthase [Morus notabilis]gb|EXB37855.1| Allene oxide synthase [Morus notabilis]	486	751	1938	0	357	456	0.78	411	456	0.9	3	456	0
comp79680_c0_seq1_31	523	ref|XP_010106073.1| Allene oxide synthase [Morus notabilis]gb|EXC07343.1| Allene oxide synthase [Morus notabilis]	525	813	2101	0	397	530	0.74	448	530	0.84	13	530	0.02
comp82626_c0_seq11_4	276	ref|XP_010104812.1| Momilactone A synthase [Morus notabilis]gb|EXC01953.1| Momilactone A synthase [Morus notabilis]	275	437	1124	1e-153	211	275	0.76	236	275	0.85
comp81091_c0_seq2_41	590	ref|XP_010101849.1| hypothetical protein L484_023639 [Morus notabilis]gb|EXB89986.1| hypothetical protein L484_023639 [Morus notabilis]	569	819	2116	0	389	548	0.7	445	548	0.81	5	548	0
comp88320_c0_seq1_11	678	ref|XP_010108018.1| Primary amine oxidase [Morus notabilis]gb|EXC17583.1| Primary amine oxidase [Morus notabilis]	678	934	2413	0	442	653	0.67	531	653	0.81	13	653	0.01
comp85136_c0_seq3_9	411	gb|AGW24283.1| chalcone synthase [Melastoma malabathricum]	391	733	1892	0	350	389	0.89	367	389	0.94
comp75806_c0_seq1_22	299	ref|XP_007219267.1| hypothetical protein PRUPE_ppa018232mg [Prunus persica]gb|EMJ20466.1| hypothetical protein PRUPE_ppa018232mg [Prunus persica]	298	409	1050	1e-141	203	295	0.68	238	295	0.8	9	295	0.03
comp69273_c0_seq1_5	303	ref|XP_010276407.1| PREDICTED: short-chain type dehydrogenase/reductase-like [Nelumbonucifera]	268	402	1033	1e-139	199	271	0.73	227	271	0.83	5	271	0.01
comp72877_c0_seq2_39	598	ref|XP_007016684.1| Plant L-ascorbate oxidase [Theobroma cacao]gb|EOY34303.1| Plant L-ascorbate oxidase [Theobroma cacao]	575	952	2461	0	437	558	0.78	488	558	0.87
comp82646_c0_seq1_8	598	ref|XP_010108103.1| hypothetical protein L484_023189 [Morus notabilis]gb|EXC17835.1| hypothetical protein L484_023189 [Morus notabilis]	596	821	2120	0	392	514	0.76	447	514	0.86	4	514	0
comp85448_c0_seq9_38	522	ref|XP_004300719.1| PREDICTED: cytochrome P450 93A1-like [Fragaria vesca subsp. vesca]	520	520	1340	1e-178	261	460	0.56	331	460	0.71	7	460	0.01
comp69261_c0_seq1_9	434	ref|XP_010060532.1| PREDICTED: protochlorophyllide reductase, chloroplastic [Eucalyptusgrandis]gb|KCW67312.1| hypothetical protein EUGRSUZ_F01098 [Eucalyptus grandis]	398	687	1772	0	335	398	0.84	356	398	0.89
comp85102_c1_seq1_6	433	ref|XP_007202080.1| hypothetical protein PRUPE_ppa007396mg [Prunus persica]gb|EMJ03279.1| hypothetical protein PRUPE_ppa007396mg [Prunus persica]	369	490	1262	1e-170	248	345	0.71	285	345	0.82	6	345	0.01
comp76446_c0_seq1_26	358	gb|AAY82488.1| chitinase [Ulmus pumila]	317	467	1201	1e-163	227	298	0.76	248	298	0.83
comp61201_c0_seq1_8	363	ref|XP_010094078.1| hypothetical protein L484_018094 [Morus notabilis]gb|EXB55168.1| hypothetical protein L484_018094 [Morus notabilis]	415	638	1646	0	311	356	0.87	332	356	0.93	1	356	0
comp75278_c0_seq1_18	179	ref|XP_010090578.1| Glycine-rich RNA-binding protein 2 [Morus notabilis]gb|EXB39885.1| Glycine-rich RNA-binding protein 2 [Morus notabilis]	151	186	471	9e-58	85	116	0.73	103	116	0.88
comp94943_c0_seq1_28	399	ref|XP_010100371.1| GDSL esterase/lipase [Morus notabilis]gb|EXB82505.1| GDSL esterase/lipase [Morus notabilis]	386	570	1468	0	278	385	0.72	309	385	0.8	13	385	0.03
comp63641_c0_seq1_7	304	ref|XP_010094107.1| Endochitinase [Morus notabilis]gb|EXB55197.1| Endochitinase [Morus notabilis]	279	475	1222	1e-168	224	279	0.8	247	279	0.88	1	279	0
comp75522_c0_seq1_29	377	ref|XP_010107622.1| 1-aminocyclopropane-1-carboxylate oxidase-1-like protein [Morusnotabilis]gb|EXC16424.1| 1-aminocyclopropane-1-carboxylate oxidase-1-like protein [Morusnotabilis]	357	471	1212	1e-164	227	359	0.63	280	359	0.77	10	359	0.02
comp71251_c0_seq1_7	258	ref|XP_010099827.1| Minor allergen Alt a 7 [Morus notabilis]gb|EXB80587.1| Minor allergen Alt a 7 [Morus notabilis]	260	411	1056	1e-144	212	260	0.81	221	260	0.85	8	260	0.03
comp39152_c0_seq1_22	247	ref|XP_007025885.1| Quinone reductase family protein [Theobroma cacao]gb|EOY28507.1| Quinone reductase family protein [Theobroma cacao]	209	357	916	1e-123	171	203	0.84	185	203	0.91
comp74178_c0_seq1_10	396	ref|XP_010095107.1| GDSL esterase/lipase [Morus notabilis]gb|EXB58273.1| GDSL esterase/lipase [Morus notabilis]	386	555	1431	0	260	360	0.72	305	360	0.84	1	360	0
comp86093_c0_seq1_8	310	ref|XP_010094101.1| Endochitinase [Morus notabilis]gb|EXB55191.1| Endochitinase [Morus notabilis]	274	402	1033	1e-139	195	270	0.72	222	270	0.82	11	270	0.04
comp78931_c0_seq1_52	445	ref|XP_010110306.1| hypothetical protein L484_019460 [Morus notabilis]gb|EXC25826.1| hypothetical protein L484_019460 [Morus notabilis]	437	704	1816	0	350	446	0.78	375	446	0.84	25	446	0.05
comp51778_c0_seq1_8	115	gb|ABO26676.1| ADP-ribosylation factor 2 [Haliotis discus discus]	182	214	546	8e-70	96	112	0.85	108	112	0.96
comp78556_c0_seq2_24	404	ref|XP_009365138.1| PREDICTED: GDSL esterase/lipase At2g04570 [Pyrus x bretschneideri]	349	518	1334	0	238	330	0.72	280	330	0.84
comp72035_c0_seq1_23	304	ref|XP_010111859.1| hypothetical protein L484_020652 [Morus notabilis]gb|EXC31824.1| hypothetical protein L484_020652 [Morus notabilis]	293	457	1176	1e-161	238	300	0.79	259	300	0.86	14	300	0.04
comp64684_c0_seq1_8	241	ref|XP_003616096.1| Cbs domain protein [Medicago truncatula]	242	366	940	1e-127	177	213	0.83	192	213	0.9	1	213	0
comp82370_c1_seq1_53	1027	ref|XP_010109186.1| putative receptor protein kinase TMK1 [Morus notabilis]gb|EXC21214.1| putative receptor protein kinase TMK1 [Morus notabilis]	956	1350	3494	0	676	938	0.72	734	938	0.78	7	938	0
comp80618_c0_seq1_18	296	ref|XP_010113421.1| hypothetical protein L484_026755 [Morus notabilis]gb|EXC35448.1| hypothetical protein L484_026755 [Morus notabilis]	271	529	1363	0	252	271	0.92	265	271	0.97
comp84406_c0_seq2_21	401	ref|XP_010094864.1| Uncharacterized protein ycf37 [Morus notabilis]gb|EXB57393.1| Uncharacterized protein ycf37 [Morus notabilis]	349	383	983	1e-129	191	233	0.81	207	233	0.88
comp72228_c0_seq1_43	511	ref|XP_010086910.1| Mitochondrial-processing peptidase subunit alpha [Morus notabilis]gb|EXB24701.1| Mitochondrial-processing peptidase subunit alpha [Morus notabilis]	508	816	2108	0	397	508	0.78	432	508	0.85	2	508	0
comp80862_c1_seq1_22	359	ref|XP_007026771.1| RP non-ATPase subunit 8A [Theobroma cacao]gb|EOY07273.1| RP non-ATPase subunit 8A [Theobroma cacao]	310	612	1579	0	299	310	0.96	306	310	0.98
comp78404_c0_seq2_46	509	ref|XP_010089047.1| Monodehydroascorbate reductase [Morus notabilis]gb|EXB37294.1| Monodehydroascorbate reductase [Morus notabilis]	491	831	2146	0	420	495	0.84	448	495	0.9	13	495	0.02
comp39650_c0_seq2_17	397	ref|XP_004287066.1| PREDICTED: glycerate dehydrogenase-like [Fragaria vesca subsp.vesca]	386	711	1834	0	339	380	0.89	354	380	0.93
comp75393_c0_seq1_10	581	ref|XP_010089616.1| putative mitochondrial-processing peptidase subunit beta [Morusnotabilis]gb|EXB38087.1| putative mitochondrial-processing peptidase subunit beta [Morusnotabilis]	534	874	2257	0	417	480	0.86	439	480	0.91
comp87096_c0_seq1_10	431	ref|XP_010108425.1| Magnesium-chelatase subunit chlI [Morus notabilis]gb|EXC19453.1| Magnesium-chelatase subunit chlI [Morus notabilis]	418	693	1788	0	358	422	0.84	374	422	0.88	4	422	0
comp74924_c0_seq1_39	709	ref|XP_010103454.1| NADH dehydrogenase [ubiquinone] iron-sulfur protein 1 [Morusnotabilis]gb|EXB95899.1| NADH dehydrogenase [ubiquinone] iron-sulfur protein 1 [Morusnotabilis]	749	1314	3400	0	632	691	0.91	653	691	0.94	2	691	0
comp84936_c0_seq1_28	428	gb|ABK93944.1| unknown [Populus trichocarpa]	392	637	1642	0	293	357	0.82	322	357	0.9
comp76373_c0_seq1_11	511	emb|CAN80681.1| hypothetical protein VITISV_037734 [Vitis vinifera]	478	381	978	1e-124	215	390	0.55	240	390	0.61	41	390	0.1
comp81162_c0_seq1_30	458	ref|XP_010088388.1| IAA-amino acid hydrolase ILR1-like 5 [Morus notabilis]gb|EXB34862.1| IAA-amino acid hydrolase ILR1-like 5 [Morus notabilis]	434	597	1538	0	293	434	0.67	346	434	0.79	9	434	0.02
comp73892_c0_seq1_23	307	ref|XP_010102930.1| 31 kDa ribonucleoprotein [Morus notabilis]gb|EXB94448.1| 31 kDa ribonucleoprotein [Morus notabilis]	319	326	835	1e-108	190	325	0.58	216	325	0.66	24	325	0.07
comp82815_c0_seq1_20	264	ref|XP_010111053.1| hypothetical protein L484_015108 [Morus notabilis]gb|EXC29915.1| hypothetical protein L484_015108 [Morus notabilis]	224	381	978	1e-132	185	227	0.81	200	227	0.88	5	227	0.02
comp82815_c0_seq1_20	264	ref|XP_010111053.1| hypothetical protein L484_015108 [Morus notabilis]gb|EXC29915.1| hypothetical protein L484_015108 [Morus notabilis]	224	381	978	1e-132	185	227	0.81	200	227	0.88	5	227	0.02
comp82815_c0_seq1_20	264	ref|XP_010111053.1| hypothetical protein L484_015108 [Morus notabilis]gb|EXC29915.1| hypothetical protein L484_015108 [Morus notabilis]	224	381	978	1e-132	185	227	0.81	200	227	0.88	5	227	0.02
comp27719_c0_seq1_10	385	ref|XP_010095129.1| Protein SRG1 [Morus notabilis]gb|EXB58295.1| Protein SRG1 [Morus notabilis]	367	455	1170	1e-157	224	365	0.61	270	365	0.73	4	365	0.01
comp82626_c0_seq11_4	276	ref|XP_010104812.1| Momilactone A synthase [Morus notabilis]gb|EXC01953.1| Momilactone A synthase [Morus notabilis]	275	437	1124	1e-153	211	275	0.76	236	275	0.85
comp58892_c0_seq1_6	225	ref|XP_010098799.1| Glycine-rich RNA-binding, abscisic acid-inducible protein [Morusnotabilis]gb|EXB75887.1| Glycine-rich RNA-binding, abscisic acid-inducible protein [Morusnotabilis]	272	233	594	5e-74	113	135	0.83	121	135	0.89
comp82623_c0_seq1_21	370	ref|XP_009800853.1| PREDICTED: hydroxyphenylpyruvate reductase-like [Nicotianasylvestris]	313	497	1279	1e-175	234	313	0.74	271	313	0.86
comp66961_c0_seq6_24	202	ref|XP_008236997.1| PREDICTED: glycine-rich RNA-binding protein GRP1A [Prunus mume]	133	99.4	246	1e-23	47	52	0.9	49	52	0.94
comp41704_c0_seq2_8	321	ref|XP_010090909.1| 5'-nucleotidase surE [Morus notabilis]gb|EXB41281.1| 5'-nucleotidase surE [Morus notabilis]	310	456	1172	1e-159	212	297	0.71	243	297	0.81
comp87390_c0_seq1_16	639	ref|XP_010095584.1| Probably inactive leucine-rich repeat receptor-like protein kinase[Morus notabilis]gb|EXB61157.1| Probably inactive leucine-rich repeat receptor-like protein kinase[Morus notabilis]	602	968	2503	0	467	622	0.75	525	622	0.84	24	622	0.03
comp84188_c2_seq1_4	206	ref|XP_010107527.1| 29 kDa ribonucleoprotein B [Morus notabilis]gb|EXC16209.1| 29 kDa ribonucleoprotein B [Morus notabilis]	296	216	550	3e-67	107	136	0.78	117	136	0.86	3	136	0.02
comp81483_c0_seq3_30	250	ref|XP_010105917.1| Serine/arginine-rich splicing factor 2 [Morus notabilis]gb|EXC06736.1| Serine/arginine-rich splicing factor 2 [Morus notabilis]	295	169	429	2e-48	82	84	0.97	83	84	0.98
comp62812_c0_seq1_24	441	ref|XP_007202072.1| hypothetical protein PRUPE_ppa005968mg [Prunus persica]gb|EMJ03271.1| hypothetical protein PRUPE_ppa005968mg [Prunus persica]	434	803	2073	0	390	434	0.89	417	434	0.96
comp73833_c0_seq1_10	400	ref|XP_004492932.1| PREDICTED: eukaryotic translation initiation factor 3 subunitI-like [Cicer arietinum]	326	599	1545	0	283	326	0.86	307	326	0.94
comp65557_c0_seq1_14	317	gb|KHG10029.1| Eukaryotic translation initiation factor 3 subunit G [Gossypiumarboreum]	296	413	1061	1e-143	207	299	0.69	227	299	0.75	6	299	0.02
comp77844_c0_seq1_37	560	ref|XP_010086967.1| CBS domain-containing protein [Morus notabilis]gb|EXB25246.1| CBS domain-containing protein [Morus notabilis]	543	836	2159	0	424	549	0.77	449	549	0.81	8	549	0.01
comp76413_c0_seq1_45	747	ref|XP_008461500.1| PREDICTED: eukaryotic translation initiation factor 3 subunitB-like [Cucumis melo]	718	1275	3300	0	612	718	0.85	652	718	0.9
comp27912_c0_seq1_5	335	ref|XP_010097377.1| hypothetical protein L484_008900 [Morus notabilis]gb|EXB67883.1| hypothetical protein L484_008900 [Morus notabilis]	330	303	777	4e-99	155	227	0.68	181	227	0.79	10	227	0.04
comp83339_c0_seq1_71	1288	ref|XP_010089232.1| Serine/threonine-protein kinase [Morus notabilis]gb|EXB37530.1| Serine/threonine-protein kinase [Morus notabilis]	1232	1614	4179	0	848	1291	0.65	951	1291	0.73	75	1291	0.05
comp90042_c0_seq1_32	384	ref|XP_010095110.1| GDSL esterase/lipase [Morus notabilis]gb|EXB58276.1| GDSL esterase/lipase [Morus notabilis]	375	604	1558	0	299	383	0.78	323	383	0.84	15	383	0.03
comp81292_c0_seq1_47	708	ref|XP_010098027.1| putative inactive receptor kinase [Morus notabilis]gb|EXB74410.1| putative inactive receptor kinase [Morus notabilis]	711	989	2557	0	500	668	0.74	539	668	0.8	2	668	0
comp42956_c0_seq1_19	1129	ref|XP_008236531.1| PREDICTED: presequence protease 1, chloroplastic/mitochondrial-like[Prunus mume]	1086	1835	4754	0	909	1092	0.83	981	1092	0.89	9	1092	0
comp42956_c0_seq1_19	1129	ref|XP_008236531.1| PREDICTED: presequence protease 1, chloroplastic/mitochondrial-like[Prunus mume]	1086	1835	4754	0	909	1092	0.83	981	1092	0.89	9	1092	0
comp3564_c0_seq1_4	109	ref|XP_010093477.1| L-type lectin-domain containing receptor kinase IX.1 [Morusnotabilis]gb|EXB54101.1| L-type lectin-domain containing receptor kinase IX.1 [Morusnotabilis]	685	163	412	2e-45	75	109	0.68	87	109	0.79	2	109	0.01
comp72441_c0_seq1_55	854	ref|XP_010112241.1| Dynamin-related protein 3A [Morus notabilis]gb|EXC32997.1| Dynamin-related protein 3A [Morus notabilis]	840	1394	3607	0	681	805	0.84	721	805	0.89	4	805	0
comp30171_c0_seq1_75	633	ref|XP_001755358.1| predicted protein [Physcomitrella patens]gb|EDQ79838.1| predicted protein [Physcomitrella patens]	582	512	1318	1e-173	274	572	0.47	354	572	0.61	31	572	0.05
comp75095_c0_seq1_23	322	ref|XP_010108764.1| Quinone oxidoreductase-like protein [Morus notabilis]gb|EXC20279.1| Quinone oxidoreductase-like protein [Morus notabilis]	323	399	1026	1e-137	204	309	0.66	227	309	0.73
comp937_c0_seq2_23	844	ref|XP_002957821.1| hypothetical protein VOLCADRAFT_77684 [Volvox carteri f.nagariensis]gb|EFJ41149.1| hypothetical protein VOLCADRAFT_77684 [Volvox carteri f.nagariensis]	1224	1425	3689	0	673	836	0.8	741	836	0.88	19	836	0.02
comp76049_c0_seq2_20	243	ref|XP_010095885.1| putative mannitol dehydrogenase [Morus notabilis]gb|EXB62435.1| putative mannitol dehydrogenase [Morus notabilis]	364	329	843	1e-110	160	230	0.69	182	230	0.79
comp67749_c0_seq1_14	493	gb|KHG11290.1| Bifunctional purple acid phosphatase 26 -like protein [Gossypiumarboreum]	477	816	2107	0	379	475	0.79	426	475	0.89
comp71850_c0_seq2_20	735	ref|XP_010111329.1| Histone-lysine N-methyltransferase, H3 lysine-9 specific SUVH1[Morus notabilis]gb|EXC30807.1| Histone-lysine N-methyltransferase, H3 lysine-9 specific SUVH1[Morus notabilis]	728	1150	2974	0	557	738	0.75	620	738	0.84	14	738	0.01
comp87721_c0_seq1_7	330	ref|XP_009804626.1| PREDICTED: NADP-dependent D-sorbitol-6-phosphate dehydrogenase-like[Nicotiana sylvestris]	309	553	1424	0	260	309	0.84	283	309	0.91
comp68932_c0_seq1_19	222	ref|XP_010096501.1| Ras-related protein [Morus notabilis]gb|EXB64621.1| Ras-related protein [Morus notabilis]	211	397	1021	1e-140	193	211	0.91	193	211	0.91
comp76884_c0_seq1_8	391	ref|XP_010111938.1| COP9 signalosome complex subunit 5b [Morus notabilis]gb|EXC32056.1| COP9 signalosome complex subunit 5b [Morus notabilis]	368	675	1741	0	323	366	0.88	336	366	0.91	1	366	0
comp72730_c0_seq1_7	365	ref|XP_010092937.1| GDSL esterase/lipase [Morus notabilis]gb|EXB52990.1| GDSL esterase/lipase [Morus notabilis]	364	569	1467	0	280	342	0.81	305	342	0.89	2	342	0
comp83808_c1_seq1_28	405	ref|XP_010091822.1| hypothetical protein L484_015891 [Morus notabilis]gb|EXB46030.1| hypothetical protein L484_015891 [Morus notabilis]	399	651	1680	0	318	399	0.79	341	399	0.85	3	399	0
comp69527_c0_seq1_23	376	ref|XP_010093755.1| 1-aminocyclopropane-1-carboxylate oxidase-1-like protein [Morusnotabilis]gb|EXB54588.1| 1-aminocyclopropane-1-carboxylate oxidase-1-like protein [Morusnotabilis]	367	442	1137	1e-152	205	368	0.55	281	368	0.76	6	368	0.01
comp75806_c0_seq1_22	299	ref|XP_007219267.1| hypothetical protein PRUPE_ppa018232mg [Prunus persica]gb|EMJ20466.1| hypothetical protein PRUPE_ppa018232mg [Prunus persica]	298	409	1050	1e-141	203	295	0.68	238	295	0.8	9	295	0.03
comp75806_c0_seq1_22	299	ref|XP_007219267.1| hypothetical protein PRUPE_ppa018232mg [Prunus persica]gb|EMJ20466.1| hypothetical protein PRUPE_ppa018232mg [Prunus persica]	298	409	1050	1e-141	203	295	0.68	238	295	0.8	9	295	0.03
comp37012_c0_seq1_46	430	ref|XP_002274118.2| PREDICTED: probable inactive purple acid phosphatase 1 [Vitisvinifera]ref|XP_010649726.1| PREDICTED: probable inactive purple acid phosphatase 1 [Vitisvinifera]	612	793	2049	0	362	430	0.84	396	430	0.92
comp75369_c0_seq1_22	337	ref|XP_010106985.1| 33 kDa ribonucleoprotein [Morus notabilis]gb|EXC12983.1| 33 kDa ribonucleoprotein [Morus notabilis]	325	363	932	1e-122	177	216	0.81	192	216	0.88	2	216	0
comp69273_c0_seq1_5	303	ref|XP_010276407.1| PREDICTED: short-chain type dehydrogenase/reductase-like [Nelumbonucifera]	268	402	1033	1e-139	199	271	0.73	227	271	0.83	5	271	0.01
comp81924_c1_seq1_25	370	ref|XP_010088733.1| putative cinnamyl alcohol dehydrogenase 9 [Morus notabilis]gb|EXB36914.1| putative cinnamyl alcohol dehydrogenase 9 [Morus notabilis]	560	577	1486	0	275	353	0.77	302	353	0.85
comp39010_c0_seq1_17	919	ref|XP_010110280.1| Coatomer subunit beta'-2 [Morus notabilis]gb|EXC25800.1| Coatomer subunit beta'-2 [Morus notabilis]	1113	1785	4623	0	857	917	0.93	878	917	0.95	7	917	0
comp57365_c0_seq1_8	390	ref|XP_010107636.1| Proline iminopeptidase [Morus notabilis]gb|EXC54478.1| Proline iminopeptidase [Morus notabilis]	330	633	1632	0	296	330	0.89	316	330	0.95
comp78844_c0_seq1_19	303	ref|XP_010101944.1| hypothetical protein L484_008192 [Morus notabilis]gb|EXB90592.1| hypothetical protein L484_008192 [Morus notabilis]	330	468	1204	1e-164	238	299	0.79	250	299	0.83	9	299	0.03
comp4999_c0_seq2_7	346	ref|XP_001697865.1| mitogen-activated protein kinase 7 [Chlamydomonas reinhardtii]gb|EDO99748.1| mitogen-activated protein kinase 7 [Chlamydomonas reinhardtii]	301	478	1231	1e-168	220	299	0.73	256	299	0.85	2	299	0
comp76812_c0_seq1_16	244	gb|ACJ38195.1| chitinase [Malus hupehensis]	316	301	771	1e-100	147	217	0.67	164	217	0.75	4	217	0.01
comp81975_c0_seq1_9	507	ref|XP_010098022.1| Serine/threonine-protein kinase STN8 [Morus notabilis]gb|EXB74405.1| Serine/threonine-protein kinase STN8 [Morus notabilis]	497	757	1955	0	382	510	0.74	422	510	0.82	17	510	0.03
comp27750_c0_seq2_7	165	ref|XP_007202700.1| hypothetical protein PRUPE_ppa012689mg [Prunus persica]gb|EMJ03899.1| hypothetical protein PRUPE_ppa012689mg [Prunus persica]	158	239	611	3e-79	116	158	0.73	127	158	0.8	1	158	0
comp86350_c0_seq1_31	364	ref|XP_010091414.1| Pto-interacting protein 1 [Morus notabilis]gb|EXB44451.1| Pto-interacting protein 1 [Morus notabilis]	665	690	1781	0	330	362	0.91	342	362	0.94
comp1575789_c0_seq1_7	277	ref|XP_004359994.1| transcriptional repressor TUP1 [Dictyostelium fasciculatum]gb|EGG22143.1| transcriptional repressor TUP1 [Dictyostelium fasciculatum]	539	468	1205	1e-162	221	277	0.79	243	277	0.87
comp73690_c0_seq1_12	412	ref|XP_004145107.1| PREDICTED: polyadenylate-binding protein RBP45-like [Cucumissativus]ref|XP_004153511.1| PREDICTED: polyadenylate-binding protein RBP45-like [Cucumissativus]	408	541	1394	0	256	320	0.8	280	320	0.87	4	320	0.01
comp85223_c0_seq1_92	1757	ref|XP_010107098.1| Brefeldin A-inhibited guanine nucleotide-exchange protein 1 [Morusnotabilis]gb|EXC13619.1| Brefeldin A-inhibited guanine nucleotide-exchange protein 1 [Morusnotabilis]	1756	3052	7913	0	1511	1769	0.85	1576	1769	0.89	45	1769	0.02
comp43143_c0_seq3_13	438	ref|XP_010094885.1| putative aarF domain-containing protein kinase [Morus notabilis]gb|EXB57414.1| putative aarF domain-containing protein kinase [Morus notabilis]	703	693	1789	0	346	437	0.79	375	437	0.85	3	437	0
comp65674_c0_seq1_30	455	ref|XP_010100196.1| hypothetical protein L484_015341 [Morus notabilis]gb|EXB81867.1| hypothetical protein L484_015341 [Morus notabilis]	378	597	1538	0	302	374	0.8	326	374	0.87	2	374	0
comp86180_c0_seq1_7	177	ref|XP_006430620.1| hypothetical protein CICLE_v10012950mg [Citrus clementina]gb|ESR43860.1| hypothetical protein CICLE_v10012950mg [Citrus clementina]	165	280	717	4e-95	133	165	0.8	151	165	0.91
comp42763_c0_seq1_6	156	ref|XP_006678916.1| calmodulin [Batrachochytrium dendrobatidis JAM81]gb|EGF80478.1| calmodulin [Batrachochytrium dendrobatidis JAM81]	169	274	700	8e-93	136	148	0.91	144	148	0.97
comp26667_c0_seq1_3	144	ref|XP_010094357.1| Pentatricopeptide repeat-containing protein [Morus notabilis]gb|EXB55868.1| Pentatricopeptide repeat-containing protein [Morus notabilis]	946	175	443	2e-48	79	92	0.85	87	92	0.94
comp77404_c1_seq1_13	493	ref|XP_010088385.1| IAA-amino acid hydrolase ILR1-like 4 [Morus notabilis]gb|EXB34859.1| IAA-amino acid hydrolase ILR1-like 4 [Morus notabilis]	445	748	1931	0	372	445	0.83	400	445	0.89	4	445	0
comp78486_c0_seq1_19	403	ref|XP_010109321.1| Intracellular protease 1 [Morus notabilis]gb|EXC21753.1| Intracellular protease 1 [Morus notabilis]	389	676	1743	0	319	389	0.82	347	389	0.89
comp75104_c0_seq2_25	345	ref|XP_004136028.1| PREDICTED: pre-mRNA-splicing factor SF2-like [Cucumis sativus]ref|XP_004160553.1| PREDICTED: pre-mRNA-splicing factor SF2-like [Cucumis sativus]	309	307	786	1e-100	151	187	0.8	157	187	0.83
comp69269_c0_seq1_28	1451	ref|XP_010095988.1| E3 ubiquitin-protein ligase KEG [Morus notabilis]gb|EXB62681.1| E3 ubiquitin-protein ligase KEG [Morus notabilis]	1645	2633	6826	0	1306	1462	0.89	1372	1462	0.93	17	1462	0.01
comp69269_c0_seq1_28	1451	ref|XP_010095988.1| E3 ubiquitin-protein ligase KEG [Morus notabilis]gb|EXB62681.1| E3 ubiquitin-protein ligase KEG [Morus notabilis]	1645	2633	6826	0	1306	1462	0.89	1372	1462	0.93	17	1462	0.01
comp85227_c0_seq1_25	993	ref|XP_010102407.1| Probably inactive leucine-rich repeat receptor-like protein kinase[Morus notabilis]gb|EXB93392.1| Probably inactive leucine-rich repeat receptor-like protein kinase[Morus notabilis]	975	1224	3167	0	649	981	0.66	745	981	0.75	32	981	0.03
comp88754_c0_seq1_29	374	ref|XP_010100462.1| Quinone oxidoreductase-like protein [Morus notabilis]gb|EXB82596.1| Quinone oxidoreductase-like protein [Morus notabilis]	385	542	1396	0	282	358	0.78	301	358	0.84	10	358	0.02
comp68950_c0_seq1_32	283	gb|KCW85601.1| hypothetical protein EUGRSUZ_B02389 [Eucalyptus grandis]	206	240	612	1e-76	120	185	0.64	129	185	0.69
comp81516_c0_seq1_88	996	ref|XP_010113026.1| putative leucine-rich repeat receptor-like protein kinase [Morusnotabilis]gb|EXC35197.1| putative leucine-rich repeat receptor-like protein kinase [Morusnotabilis]	964	1493	3864	0	732	968	0.75	831	968	0.85	8	968	0
comp79900_c0_seq1_47	630	gb|KGN51472.1| hypothetical protein Csa_5G563290 [Cucumis sativus]	612	1137	2940	0	545	612	0.89	577	612	0.94	2	612	0
comp83973_c1_seq1_25	365	ref|XP_009348744.1| PREDICTED: GDSL esterase/lipase At5g03610-like [Pyrus xbretschneideri]	357	480	1235	1e-168	234	321	0.72	274	321	0.85	4	321	0.01
comp52296_c0_seq1_16	325	ref|XP_002735015.1| PREDICTED: guanine nucleotide-binding protein subunit beta-2-like1-like [Saccoglossus kowalevskii]	316	479	1232	1e-168	225	312	0.72	262	312	0.83	2	312	0
comp80534_c0_seq1_6	356	ref|XP_010092621.1| Quinone oxidoreductase PIG3 [Morus notabilis]gb|EXB51810.1| Quinone oxidoreductase PIG3 [Morus notabilis]	325	511	1316	0	255	325	0.78	275	325	0.84
comp83191_c2_seq1_6	298	ref|XP_009357480.1| PREDICTED: proline synthase co-transcribed bacterial homologprotein-like [Pyrus x bretschneideri]	276	412	1058	1e-143	203	271	0.74	226	271	0.83	1	271	0
comp27285_c0_seq1_10	401	ref|XP_008225274.1| PREDICTED: UBP1-associated protein 2C-like [Prunus mume]ref|XP_008225276.1| PREDICTED: UBP1-associated protein 2C-like [Prunus mume]ref|XP_008225277.1| PREDICTED: UBP1-associated protein 2C-like [Prunus mume]	381	380	975	1e-127	220	408	0.53	262	408	0.64	48	408	0.11
comp77424_c0_seq19_21	390	ref|XP_010095280.1| Splicing factor U2af large subunit B [Morus notabilis]gb|EXB59126.1| Splicing factor U2af large subunit B [Morus notabilis]	599	697	1799	0	347	382	0.9	358	382	0.93	2	382	0
comp73248_c0_seq1_26	477	ref|XP_010097171.1| hypothetical protein L484_025717 [Morus notabilis]gb|EXB67238.1| hypothetical protein L484_025717 [Morus notabilis]	460	661	1706	0	340	461	0.73	361	461	0.78	3	461	0
comp5611_c0_seq1_10	199	ref|XP_008036587.1| ARF/SAR [Trametes versicolor FP-101664 SS1]gb|EIW60121.1| ARF/SAR [Trametes versicolor FP-101664 SS1]	189	298	762	1e-101	142	185	0.76	160	185	0.86
comp68641_c0_seq1_5	297	ref|XP_010107870.1| hypothetical protein L484_027457 [Morus notabilis]gb|EXC17270.1| hypothetical protein L484_027457 [Morus notabilis]	301	413	1062	1e-143	206	274	0.75	224	274	0.81	28	274	0.1
comp78570_c0_seq2_30	395	ref|XP_007215709.1| hypothetical protein PRUPE_ppa008913mg [Prunus persica]gb|EMJ16908.1| hypothetical protein PRUPE_ppa008913mg [Prunus persica]	314	305	781	5e-99	190	337	0.56	211	337	0.62	50	337	0.14
comp62034_c0_seq1_13	221	ref|XP_010112118.1| Serine/arginine-rich splicing factor 7 [Morus notabilis]gb|EXC32743.1| Serine/arginine-rich splicing factor 7 [Morus notabilis]	187	107	267	7e-26	53	71	0.74	54	71	0.76
comp47041_c0_seq2_27	310	ref|XP_010101715.1| hypothetical protein L484_017345 [Morus notabilis]gb|EXB89379.1| hypothetical protein L484_017345 [Morus notabilis]	340	493	1270	1e-174	240	282	0.85	255	282	0.9
comp83636_c0_seq1_22	900	ref|XP_010099328.1| Receptor-like protein kinase FERONIA [Morus notabilis]gb|EXB77674.1| Receptor-like protein kinase FERONIA [Morus notabilis]	867	961	2485	0	520	886	0.58	628	886	0.7	64	886	0.07
comp62423_c0_seq1_38	678	ref|XP_010096580.1| putative inactive purple acid phosphatase 2 [Morus notabilis]gb|EXB65080.1| putative inactive purple acid phosphatase 2 [Morus notabilis]	665	1103	2854	0	517	643	0.8	579	643	0.9	1	643	0
comp82002_c0_seq1_29	335	ref|XP_010093624.1| Epoxide hydrolase 2 [Morus notabilis]gb|EXB54385.1| Epoxide hydrolase 2 [Morus notabilis]	315	541	1393	0	257	312	0.82	282	312	0.9
comp69261_c0_seq1_9	434	ref|XP_010060532.1| PREDICTED: protochlorophyllide reductase, chloroplastic [Eucalyptusgrandis]gb|KCW67312.1| hypothetical protein EUGRSUZ_F01098 [Eucalyptus grandis]	398	687	1772	0	335	398	0.84	356	398	0.89
comp69261_c0_seq1_9	434	ref|XP_010060532.1| PREDICTED: protochlorophyllide reductase, chloroplastic [Eucalyptusgrandis]gb|KCW67312.1| hypothetical protein EUGRSUZ_F01098 [Eucalyptus grandis]	398	687	1772	0	335	398	0.84	356	398	0.89
comp59599_c0_seq1_10	454	ref|XP_010099094.1| Nucleolysin TIAR [Morus notabilis]gb|EXB76742.1| Nucleolysin TIAR [Morus notabilis]	413	695	1794	0	345	413	0.83	358	413	0.86	10	413	0.02
comp69508_c0_seq1_21	431	ref|XP_007215536.1| hypothetical protein PRUPE_ppa007179mg [Prunus persica]gb|EMJ16735.1| hypothetical protein PRUPE_ppa007179mg [Prunus persica]	379	337	865	1e-110	169	228	0.74	187	228	0.82	1	228	0
comp81404_c0_seq6_10	339	gb|AHG52039.1| cinnamyl alcohol dehydrogenase [Boehmeria nivea]	358	611	1575	0	307	330	0.93	309	330	0.93
comp77110_c1_seq1_13	423	gb|AEV89968.1| mitogen activated protein kinase [Humulus lupulus]	380	722	1864	0	348	380	0.91	361	380	0.95	3	380	0
comp84502_c1_seq1_8	379	ref|XP_010091979.1| DNA-damage-repair/toleration protein [Morus notabilis]gb|EXB48385.1| DNA-damage-repair/toleration protein [Morus notabilis]	367	583	1502	0	292	345	0.84	318	345	0.92
comp81064_c1_seq1_52	732	ref|XP_007211358.1| hypothetical protein PRUPE_ppa002050mg [Prunus persica]gb|EMJ12557.1| hypothetical protein PRUPE_ppa002050mg [Prunus persica]	724	972	2512	0	474	725	0.65	553	725	0.76	2	725	0
comp72686_c0_seq1_8	249	ref|XP_010087838.1| hypothetical protein L484_020914 [Morus notabilis]gb|EXB30274.1| hypothetical protein L484_020914 [Morus notabilis]	241	363	933	1e-125	185	246	0.75	199	246	0.8	8	246	0.03
comp82370_c1_seq1_53	1027	ref|XP_010109186.1| putative receptor protein kinase TMK1 [Morus notabilis]gb|EXC21214.1| putative receptor protein kinase TMK1 [Morus notabilis]	956	1350	3494	0	676	938	0.72	734	938	0.78	7	938	0
comp39790_c0_seq1_19	459	ref|XP_010100740.1| putative LRR receptor-like serine/threonine-protein kinase [Morusnotabilis]gb|EXB84043.1| putative LRR receptor-like serine/threonine-protein kinase [Morusnotabilis]	450	525	1353	0	261	381	0.68	288	381	0.75
comp73197_c0_seq1_14	178	gb|AFK93503.1| pathogenesis related protein 1 isoform 4 [Ficus pumila var.awkeotsang]	169	286	733	2e-97	135	163	0.82	148	163	0.9
comp69528_c0_seq1_26	305	ref|XP_003634205.1| PREDICTED: uncharacterized protein LOC100853969 isoform X3 [Vitisvinifera]ref|XP_010663677.1| PREDICTED: uncharacterized protein LOC100853969 isoform X4 [Vitisvinifera]	291	444	1142	1e-155	215	291	0.73	235	291	0.8
comp75032_c0_seq1_8	290	gb|KDP25627.1| hypothetical protein JCGZ_20783 [Jatropha curcas]	277	367	941	1e-125	190	270	0.7	206	270	0.76	12	270	0.04
comp68775_c0_seq1_36	467	ref|XP_010112575.1| hypothetical protein L484_010580 [Morus notabilis]gb|EXC34122.1| hypothetical protein L484_010580 [Morus notabilis]	464	777	2007	0	374	433	0.86	391	433	0.9
comp928453_c0_seq1_27	275	ref|XP_001689574.1| DNA replication complex GINS protein [Chlamydomonas reinhardtii]gb|EDP09312.1| DNA replication complex GINS protein [Chlamydomonas reinhardtii]	217	182	462	5e-54	95	189	0.5	126	189	0.66	4	189	0.02
comp77436_c0_seq1_8	371	ref|XP_010091334.1| hypothetical protein L484_000482 [Morus notabilis]gb|EXC36913.1| hypothetical protein L484_000482 [Morus notabilis]	371	572	1474	0	279	345	0.8	313	345	0.9	2	345	0
comp85227_c0_seq1_25	993	ref|XP_010102407.1| Probably inactive leucine-rich repeat receptor-like protein kinase[Morus notabilis]gb|EXB93392.1| Probably inactive leucine-rich repeat receptor-like protein kinase[Morus notabilis]	975	1224	3167	0	649	981	0.66	745	981	0.75	32	981	0.03
comp58025_c0_seq1_4	194	ref|XP_010103679.1| hypothetical protein L484_011731 [Morus notabilis]gb|EXB96691.1| hypothetical protein L484_011731 [Morus notabilis]	173	213	541	6e-68	101	142	0.71	118	142	0.83	3	142	0.02
comp27682_c0_seq1_15	190	ref|XP_008346349.1| PREDICTED: pathogenesis-related protein 1-like [Malus domestica]	161	253	646	5e-84	117	142	0.82	131	142	0.92
comp64684_c0_seq1_8	241	ref|XP_003616096.1| Cbs domain protein [Medicago truncatula]	242	366	940	1e-127	177	213	0.83	192	213	0.9	1	213	0
comp82370_c1_seq1_53	1027	ref|XP_010109186.1| putative receptor protein kinase TMK1 [Morus notabilis]gb|EXC21214.1| putative receptor protein kinase TMK1 [Morus notabilis]	956	1350	3494	0	676	938	0.72	734	938	0.78	7	938	0
comp76653_c1_seq1_12	266	gb|AIJ04690.1| 14-3-3a [Morus alba var. atropurpurea]	262	513	1321	0	252	257	0.98	256	257	0.99
comp72085_c0_seq1_31	338	ref|XP_007223058.1| hypothetical protein PRUPE_ppa006980mg [Prunus persica]gb|EMJ24257.1| hypothetical protein PRUPE_ppa006980mg [Prunus persica]	387	580	1495	0	286	320	0.89	299	320	0.93	2	320	0
comp87390_c0_seq1_16	639	ref|XP_010095584.1| Probably inactive leucine-rich repeat receptor-like protein kinase[Morus notabilis]gb|EXB61157.1| Probably inactive leucine-rich repeat receptor-like protein kinase[Morus notabilis]	602	968	2503	0	467	622	0.75	525	622	0.84	24	622	0.03
comp77844_c0_seq1_37	560	ref|XP_010086967.1| CBS domain-containing protein [Morus notabilis]gb|EXB25246.1| CBS domain-containing protein [Morus notabilis]	543	836	2159	0	424	549	0.77	449	549	0.81	8	549	0.01
comp83339_c0_seq1_71	1288	ref|XP_010089232.1| Serine/threonine-protein kinase [Morus notabilis]gb|EXB37530.1| Serine/threonine-protein kinase [Morus notabilis]	1232	1614	4179	0	848	1291	0.65	951	1291	0.73	75	1291	0.05
comp81292_c0_seq1_47	708	ref|XP_010098027.1| putative inactive receptor kinase [Morus notabilis]gb|EXB74410.1| putative inactive receptor kinase [Morus notabilis]	711	989	2557	0	500	668	0.74	539	668	0.8	2	668	0
comp3564_c0_seq1_4	109	ref|XP_010093477.1| L-type lectin-domain containing receptor kinase IX.1 [Morusnotabilis]gb|EXB54101.1| L-type lectin-domain containing receptor kinase IX.1 [Morusnotabilis]	685	163	412	2e-45	75	109	0.68	87	109	0.79	2	109	0.01
comp30171_c0_seq1_75	633	ref|XP_001755358.1| predicted protein [Physcomitrella patens]gb|EDQ79838.1| predicted protein [Physcomitrella patens]	582	512	1318	1e-173	274	572	0.47	354	572	0.61	31	572	0.05
comp59227_c0_seq1_16	259	gb|AIJ04693.1| 14-3-3d [Morus alba var. atropurpurea]	260	497	1279	1e-177	242	259	0.93	250	259	0.96
comp4999_c0_seq2_7	346	ref|XP_001697865.1| mitogen-activated protein kinase 7 [Chlamydomonas reinhardtii]gb|EDO99748.1| mitogen-activated protein kinase 7 [Chlamydomonas reinhardtii]	301	478	1231	1e-168	220	299	0.73	256	299	0.85	2	299	0
comp81975_c0_seq1_9	507	ref|XP_010098022.1| Serine/threonine-protein kinase STN8 [Morus notabilis]gb|EXB74405.1| Serine/threonine-protein kinase STN8 [Morus notabilis]	497	757	1955	0	382	510	0.74	422	510	0.82	17	510	0.03
comp86350_c0_seq1_31	364	ref|XP_010091414.1| Pto-interacting protein 1 [Morus notabilis]gb|EXB44451.1| Pto-interacting protein 1 [Morus notabilis]	665	690	1781	0	330	362	0.91	342	362	0.94
comp42763_c0_seq1_6	156	ref|XP_006678916.1| calmodulin [Batrachochytrium dendrobatidis JAM81]gb|EGF80478.1| calmodulin [Batrachochytrium dendrobatidis JAM81]	169	274	700	8e-93	136	148	0.91	144	148	0.97
comp79610_c0_seq1_64	1018	ref|XP_007015657.1| BRI1 suppressor 1 (BSU1)-like 2 isoform 1 [Theobroma cacao]ref|XP_007015658.1| BRI1 suppressor 1 (BSU1)-like 2 isoform 1 [Theobroma cacao]ref|XP_007015659.1| BRI1 suppressor 1 (BSU1)-like 2 isoform 1 [Theobroma cacao]gb|EOY33276.1| BRI1 suppressor 1 (BSU1)-like 2 isoform 1 [Theobroma cacao]gb|EOY33277.1| BRI1 suppressor 1 (BSU1)-like 2 isoform 1 [Theobroma cacao]gb|EOY33278.1|…	1019	1625	4207	0	827	1023	0.8	844	1023	0.82	11	1023	0.01
comp69269_c0_seq1_28	1451	ref|XP_010095988.1| E3 ubiquitin-protein ligase KEG [Morus notabilis]gb|EXB62681.1| E3 ubiquitin-protein ligase KEG [Morus notabilis]	1645	2633	6826	0	1306	1462	0.89	1372	1462	0.93	17	1462	0.01
comp85227_c0_seq1_25	993	ref|XP_010102407.1| Probably inactive leucine-rich repeat receptor-like protein kinase[Morus notabilis]gb|EXB93392.1| Probably inactive leucine-rich repeat receptor-like protein kinase[Morus notabilis]	975	1224	3167	0	649	981	0.66	745	981	0.75	32	981	0.03
comp81516_c0_seq1_88	996	ref|XP_010113026.1| putative leucine-rich repeat receptor-like protein kinase [Morusnotabilis]gb|EXC35197.1| putative leucine-rich repeat receptor-like protein kinase [Morusnotabilis]	964	1493	3864	0	732	968	0.75	831	968	0.85	8	968	0
comp83636_c0_seq1_22	900	ref|XP_010099328.1| Receptor-like protein kinase FERONIA [Morus notabilis]gb|EXB77674.1| Receptor-like protein kinase FERONIA [Morus notabilis]	867	961	2485	0	520	886	0.58	628	886	0.7	64	886	0.07
comp77110_c1_seq1_13	423	gb|AEV89968.1| mitogen activated protein kinase [Humulus lupulus]	380	722	1864	0	348	380	0.91	361	380	0.95	3	380	0
comp84804_c0_seq2_42	725	ref|XP_010102639.1| hypothetical protein L484_010931 [Morus notabilis]gb|EXB93789.1| hypothetical protein L484_010931 [Morus notabilis]	714	1092	2823	0	531	719	0.73	594	719	0.82	9	719	0.01
comp59960_c0_seq1_28	357	ref|XP_010104850.1| ATP-dependent Clp protease proteolytic subunit-related protein 4[Morus notabilis]gb|EXC02086.1| ATP-dependent Clp protease proteolytic subunit-related protein 4[Morus notabilis]	307	431	1109	1e-149	212	245	0.86	222	245	0.9
comp71920_c0_seq1_20	903	ref|XP_010086835.1| hypothetical protein L484_006064 [Morus notabilis]gb|EXB24033.1| hypothetical protein L484_006064 [Morus notabilis]	891	1525	3948	0	754	892	0.84	798	892	0.89	1	892	0
comp63067_c0_seq1_21	225	ref|XP_010092659.1| Putative vesicle-associated membrane protein 726 [Morus notabilis]gb|EXB51910.1| Putative vesicle-associated membrane protein 726 [Morus notabilis]	221	402	1033	1e-141	190	221	0.85	199	221	0.9
comp62855_c0_seq2_18	716	ref|XP_010095431.1| hypothetical protein L484_013388 [Morus notabilis]gb|EXB60123.1| hypothetical protein L484_013388 [Morus notabilis]	732	1078	2788	0	527	712	0.74	588	712	0.82	22	712	0.03
comp58441_c0_seq1_53	973	ref|XP_010110893.1| Coatomer subunit beta-1 [Morus notabilis]gb|EXC28846.1| Coatomer subunit beta-1 [Morus notabilis]	952	1731	4482	0	835	952	0.87	873	952	0.91
comp79307_c0_seq7_12	529	ref|XP_010094336.1| Importin subunit alpha-1 [Morus notabilis]gb|EXB55756.1| Importin subunit alpha-1 [Morus notabilis]	529	976	2522	0	478	529	0.9	497	529	0.93	1	529	0
comp73252_c0_seq1_9	288	ref|XP_010108111.1| ATP-dependent Clp protease proteolytic subunit-related protein 2[Morus notabilis]gb|EXC17843.1| ATP-dependent Clp protease proteolytic subunit-related protein 2[Morus notabilis]	289	484	1247	1e-172	237	285	0.83	249	285	0.87	1	285	0
comp78765_c0_seq1_14	676	ref|XP_010091406.1| hypothetical protein L484_013861 [Morus notabilis]gb|EXB44443.1| hypothetical protein L484_013861 [Morus notabilis]	662	931	2405	0	465	679	0.68	541	679	0.79	28	679	0.04
comp61129_c0_seq1_8	335	ref|XP_010098530.1| ATP-dependent Clp protease proteolytic subunit 4 [Morus notabilis]gb|EXB75190.1| ATP-dependent Clp protease proteolytic subunit 4 [Morus notabilis]	293	434	1117	1e-151	222	297	0.74	243	297	0.81	6	297	0.02
comp84354_c2_seq1_6	396	ref|XP_010099610.1| ATP-dependent Clp protease proteolytic subunit-related protein 1[Morus notabilis]gb|EXB80041.1| ATP-dependent Clp protease proteolytic subunit-related protein 1[Morus notabilis]	410	564	1454	0	282	381	0.74	302	381	0.79	19	381	0.04
comp77231_c0_seq1_50	695	ref|XP_007039986.1| Sec1/munc18-like (SM) proteins superfamily isoform 1 [Theobromacacao]gb|EOY24487.1| Sec1/munc18-like (SM) proteins superfamily isoform 1 [Theobromacacao]	663	1141	2952	0	538	658	0.81	605	658	0.91	6	658	0
comp72497_c1_seq1_3	206	gb|ABK93525.1| unknown [Populus trichocarpa]	199	389	999	1e-137	179	199	0.89	193	199	0.96
comp58431_c0_seq1_35	477	ref|XP_010106443.1| Inner membrane protein PPF-1 [Morus notabilis]gb|EXC10619.1| Inner membrane protein PPF-1 [Morus notabilis]	450	635	1637	0	332	444	0.74	345	444	0.77	12	444	0.02
comp20614_c0_seq1_8	189	ref|XP_780122.2| PREDICTED: receptor expression-enhancing protein 5-like isoform 1[Strongylocentrotus purpuratus]	207	118	295	3e-30	61	122	0.5	80	122	0.65	7	122	0.05
comp83645_c0_seq1_28	1498	ref|XP_010099662.1| Pleiotropic drug resistance protein 1 [Morus notabilis]gb|EXB80183.1| Pleiotropic drug resistance protein 1 [Morus notabilis]	1423	2203	5709	0	1058	1407	0.75	1190	1407	0.84	17	1407	0.01
comp83645_c0_seq1_28	1498	ref|XP_010099662.1| Pleiotropic drug resistance protein 1 [Morus notabilis]gb|EXB80183.1| Pleiotropic drug resistance protein 1 [Morus notabilis]	1423	2203	5709	0	1058	1407	0.75	1190	1407	0.84	17	1407	0.01
comp83645_c0_seq1_28	1498	ref|XP_010099662.1| Pleiotropic drug resistance protein 1 [Morus notabilis]gb|EXB80183.1| Pleiotropic drug resistance protein 1 [Morus notabilis]	1423	2203	5709	0	1058	1407	0.75	1190	1407	0.84	17	1407	0.01
comp71850_c0_seq2_20	735	ref|XP_010111329.1| Histone-lysine N-methyltransferase, H3 lysine-9 specific SUVH1[Morus notabilis]gb|EXC30807.1| Histone-lysine N-methyltransferase, H3 lysine-9 specific SUVH1[Morus notabilis]	728	1150	2974	0	557	738	0.75	620	738	0.84	14	738	0.01
comp82095_c0_seq2_12	745	ref|XP_010096765.1| ABC transporter G family member 7 [Morus notabilis]gb|EXB65617.1| ABC transporter G family member 7 [Morus notabilis]	736	1166	3017	0	573	663	0.86	601	663	0.9	3	663	0
comp82095_c0_seq2_12	745	ref|XP_010096765.1| ABC transporter G family member 7 [Morus notabilis]gb|EXB65617.1| ABC transporter G family member 7 [Morus notabilis]	736	1166	3017	0	573	663	0.86	601	663	0.9	3	663	0
comp79621_c0_seq3_29	489	ref|XP_006421924.1| hypothetical protein CICLE_v10004755mg [Citrus clementina]gb|ESR35164.1| hypothetical protein CICLE_v10004755mg [Citrus clementina]	514	863	2231	0	401	431	0.93	415	431	0.96
comp75494_c0_seq1_11	493	gb|AHY02156.1| ultraviolet-B receptor UVR8 [Betula platyphylla]	441	747	1928	0	360	443	0.81	390	443	0.88	2	443	0
comp56339_c0_seq1_3	257	dbj|BAN13564.1| actin, partial [Chrysanthemum seticuspe f. boreale]	280	531	1369	0	256	257	0.99	257	257	1
comp82035_c0_seq1_35	379	ref|XP_004981971.1| PREDICTED: actin-1-like isoform X2 [Setaria italica]	382	778	2010	0	372	378	0.98	377	378	0.99
comp60460_c0_seq1_15	246	ref|XP_008219157.1| PREDICTED: tubulin alpha chain-like isoform X2 [Prunus mume]	442	461	1185	1e-161	224	246	0.91	227	246	0.92
comp77328_c0_seq1_25	413	ref|XP_010103809.1| 14-3-3 protein 4 [Morus notabilis]gb|EXB97171.1| 14-3-3 protein 4 [Morus notabilis]	739	711	1836	0	341	378	0.9	354	378	0.93
comp68136_c0_seq1_6	204	ref|XP_010089109.1| Tubulin beta-1 chain [Morus notabilis]gb|EXB37356.1| Tubulin beta-1 chain [Morus notabilis]	445	393	1009	1e-135	187	202	0.92	187	202	0.92
comp25705_c0_seq1_4	88	gb|KHG16112.1| Tubulin beta-1 chain [Gossypium arboreum]	227	159	401	1e-47	72	75	0.96	75	75	1
comp42763_c0_seq1_6	156	ref|XP_006678916.1| calmodulin [Batrachochytrium dendrobatidis JAM81]gb|EGF80478.1| calmodulin [Batrachochytrium dendrobatidis JAM81]	169	274	700	8e-93	136	148	0.91	144	148	0.97
comp53934_c0_seq1_4	89	dbj|BAJ16350.1| actin 2 [Papaver somniferum]	167	182	463	7e-58	89	89	1	89	89	1

## Sheet: Root proteins_vs_nr.blast
Query	Q_Length	Subject	S_Length	Score_Bits	Score	E_Value	Identities	Identities	Identities	Positives	Positives	Positives	Gaps	Gaps	Gaps
comp74350_c0_seq1_11	178	ref|XP_009376634.1| PREDICTED: histone H2A.1 [Pyrus x bretschneideri]	149	161	407	4e-48	80	105	0.76	83	105	0.79
comp11616_c0_seq1_2	82	ref|XP_007004014.1| hypothetical protein TREMEDRAFT_43829 [Tremella mesenterica DSM1558]gb|EIW70249.1| hypothetical protein TREMEDRAFT_43829 [Tremella mesenterica DSM1558]	138	150	378	2e-45	72	82	0.87	79	82	0.96
comp579_c0_seq1_3	87	ref|XP_002179286.1| histone H4 isoform 1b [Phaeodactylum tricornutum CCAP 1055/1]ref|XP_002179505.1| histone H4 isoform 1a [Phaeodactylum tricornutum CCAP 1055/1]ref|XP_002288196.1| histone H4 [Thalassiosira pseudonana CCMP1335]ref|XP_002295724.1| predicted protein [Thalassiosira pseudonana CCMP1335]ref|XP_002295814.1| predicted protein [Thalassiosira pseudonana CCMP1335]ref|XP_002296170.1| histo…	103	132	332	8e-39	66	66	1	66	66	1
comp65910_c0_seq1_29	510	gb|AIX11669.1| ATP synthase CF1 beta subunit (chloroplast) [Morus mongolica]	498	994	2571	0	491	498	0.98	495	498	0.99
comp80191_c0_seq1_11	582	ref|XP_004299555.1| PREDICTED: ATP synthase subunit beta, mitochondrial-like [Fragariavesca subsp. vesca]	551	921	2380	0	455	470	0.96	462	470	0.98
comp77857_c0_seq7_9	525	ref|YP_635994.1| ATP synthase CF1 beta subunit (chloroplast) [Acutodesmus obliquus]sp|Q1KVT0.1|ATPB_ACUOB RecName: Full=ATP synthase subunit beta, chloroplastic; AltName:Full=ATP synthase F1 sector subunit beta; AltName:Full=F-ATPase subunit beta (chloroplast) [Acutodesmusobliquus]gb|ABD48277.1| CF1 beta subunit of ATP synthase [Acutodesmus obliquus]	480	959	2478	0	471	481	0.97	477	481	0.99	1	481	0
comp83983_c0_seq1_50	771	ref|XP_010099974.1| putative glycerophosphoryl diester phosphodiesterase 2 [Morusnotabilis]gb|EXB81079.1| putative glycerophosphoryl diester phosphodiesterase 2 [Morusnotabilis]	748	1068	2761	0	521	727	0.71	603	727	0.82	22	727	0.03
comp54370_c0_seq1_4	149	gb|AIE45411.1| alcohol dehydrogenase, partial [Penstemon laetus]	182	218	555	1e-70	106	149	0.71	114	149	0.76
comp78941_c0_seq1_26	382	ref|XP_010110474.1| Alcohol dehydrogenase 1 [Morus notabilis]gb|EXC26575.1| Alcohol dehydrogenase 1 [Morus notabilis]	380	708	1828	0	341	380	0.89	356	380	0.93
comp81040_c0_seq1_13	571	ref|XP_010098534.1| Reticuline oxidase-like protein [Morus notabilis]gb|EXB75194.1| Reticuline oxidase-like protein [Morus notabilis]	547	789	2038	0	366	525	0.69	434	525	0.82	2	525	0
comp81392_c0_seq1_13	420	ref|XP_010091525.1| Malate dehydrogenase [Morus notabilis]gb|EXB44695.1| Malate dehydrogenase [Morus notabilis]	396	663	1710	0	335	408	0.82	351	408	0.86	16	408	0.03
comp595_c0_seq1_8	337	ref|XP_002954828.1| malate dehydrogenase [Volvox carteri f. nagariensis]gb|EFJ44027.1| malate dehydrogenase [Volvox carteri f. nagariensis]	342	379	973	1e-128	201	332	0.6	228	332	0.68	4	332	0.01
comp27554_c0_seq1_10	520	gb|EYU37978.1| hypothetical protein MIMGU_mgv1a002825mg [Erythranthe guttata]	634	977	2526	0	474	499	0.94	490	499	0.98	2	499	0
comp78366_c0_seq1_57	967	ref|XP_010108239.1| Phosphoenolpyruvate carboxylase, housekeeping isozyme [Morusnotabilis]gb|EXC18479.1| Phosphoenolpyruvate carboxylase, housekeeping isozyme [Morusnotabilis]	1376	1852	4798	0	887	964	0.92	920	964	0.95
comp27906_c0_seq2_22	305	emb|CBI29427.3| unnamed protein product [Vitis vinifera]	356	443	1140	1e-154	222	271	0.81	233	271	0.85	1	271	0
comp24629_c0_seq1_10	275	gb|ABK24331.1| unknown [Picea sitchensis]	410	410	1053	1e-141	207	277	0.74	233	277	0.84	4	277	0.01
comp85174_c2_seq2_7	371	ref|XP_008459895.1| PREDICTED: pyruvate dehydrogenase E1 component subunit beta-1,mitochondrial [Cucumis melo]ref|XP_008459896.1| PREDICTED: pyruvate dehydrogenase E1 component subunit beta-1,mitochondrial [Cucumis melo]	372	694	1792	0	338	371	0.91	357	371	0.96	3	371	0
comp78897_c0_seq1_9	383	ref|XP_010100109.1| Putative 12-oxophytodienoate reductase 11 [Morus notabilis]gb|EXB81492.1| Putative 12-oxophytodienoate reductase 11 [Morus notabilis]	372	682	1759	0	319	370	0.86	345	370	0.93	1	370	0
comp81986_c1_seq4_13	447	gb|ACD93720.1| glycolate oxidase [Mikania micrantha]	369	713	1840	0	344	369	0.93	360	369	0.97
comp12115_c0_seq1_9	209	gb|ADC54203.1| RE21838p [Drosophila melanogaster]	353	417	1073	1e-146	204	209	0.97	207	209	0.99
comp67723_c0_seq1_15	270	ref|XP_008231281.1| PREDICTED: ATP synthase subunit O, mitochondrial [Prunus mume]	251	354	908	1e-121	170	251	0.67	211	251	0.84
comp53956_c0_seq1_19	391	gb|ADK36629.1| vacuolar H+-pyrophosphatase [Dunaliella viridis]	762	511	1315	1e-173	255	378	0.67	295	378	0.78	1	378	0
comp38425_c0_seq1_8	365	ref|XP_009355925.1| PREDICTED: succinyl-CoA ligase [ADP-forming] subunit alpha-2,mitochondrial [Pyrus x bretschneideri]	334	573	1477	0	289	340	0.85	298	340	0.87	6	340	0.01
comp84757_c0_seq2_44	596	ref|XP_007018504.1| NADP-dependent malic enzyme [Theobroma cacao]gb|EOY15729.1| NADP-dependent malic enzyme [Theobroma cacao]	591	1023	2644	0	491	591	0.83	524	591	0.88
comp69419_c0_seq1_43	685	ref|XP_008453738.1| PREDICTED: succinate dehydrogenase [ubiquinone] flavoproteinsubunit 1, mitochondrial [Cucumis melo]	635	1159	2999	0	553	636	0.86	573	636	0.9	1	636	0
comp75095_c0_seq1_23	322	ref|XP_010108764.1| Quinone oxidoreductase-like protein [Morus notabilis]gb|EXC20279.1| Quinone oxidoreductase-like protein [Morus notabilis]	323	399	1026	1e-137	204	309	0.66	227	309	0.73
comp51310_c1_seq1_10	509	ref|YP_635984.1| ATP synthase CF1 alpha subunit (chloroplast) [Acutodesmus obliquus]sp|Q1KVU0.1|ATPA_ACUOB RecName: Full=ATP synthase subunit alpha, chloroplastic; AltName:Full=ATP synthase F1 sector subunit alpha; AltName:Full=F-ATPase subunit alpha (chloroplast) [Acutodesmusobliquus]gb|ABD48267.1| CF1 alpha subunit of ATP synthase [Acutodesmus obliquus]	507	984	2545	0	488	507	0.96	499	507	0.98
comp84930_c1_seq1_51	652	ref|XP_010110200.1| Dihydrolipoyllysine-residue acetyltransferase component 1 ofpyruvate dehydrogenase complex [Morus notabilis]gb|EXC25438.1| Dihydrolipoyllysine-residue acetyltransferase component 1 ofpyruvate dehydrogenase complex [Morus notabilis]	639	885	2288	0	451	569	0.79	478	569	0.84	8	569	0.01
comp808318_c0_seq1_1	106	gb|AAC16696.1| F1-ATP synthase subunit alpha [Nicotiana repanda]	89	145	366	9e-44	71	76	0.93	76	76	1
comp73026_c0_seq1_6	440	ref|XP_008339978.1| PREDICTED: pyruvate dehydrogenase E1 component subunit alpha,mitochondrial-like [Malus domestica]	399	715	1846	0	342	401	0.85	366	401	0.91	2	401	0
comp85889_c0_seq1_44	595	ref|XP_010100450.1| putative nucleoredoxin 1 [Morus notabilis]gb|EXB82584.1| putative nucleoredoxin 1 [Morus notabilis]	568	845	2184	0	418	571	0.73	465	571	0.81	3	571	0
comp38935_c0_seq1_54	828	ref|XP_010096180.1| Vacuolar proton translocating ATPase 100 kDa subunit [Morusnotabilis]gb|EXB63575.1| Vacuolar proton translocating ATPase 100 kDa subunit [Morusnotabilis]	814	1420	3676	0	685	814	0.84	727	814	0.89
comp68890_c0_seq1_11	395	ref|XP_007199930.1| hypothetical protein PRUPE_ppa006317mg [Prunus persica]gb|EMJ01129.1| hypothetical protein PRUPE_ppa006317mg [Prunus persica]	417	709	1831	0	341	376	0.9	354	376	0.94
comp86202_c0_seq1_31	1010	ref|XP_010104390.1| Phosphoenolpyruvate carboxylase 2 [Morus notabilis]gb|EXC00235.1| Phosphoenolpyruvate carboxylase 2 [Morus notabilis]	967	1844	4777	0	892	967	0.92	915	967	0.94	1	967	0
comp77124_c0_seq3_21	415	ref|XP_007026083.1| ATPase, F1 complex, gamma subunit protein [Theobroma cacao]gb|EOY28705.1| ATPase, F1 complex, gamma subunit protein [Theobroma cacao]	375	602	1551	0	293	375	0.78	318	375	0.84	1	375	0
comp85542_c0_seq2_27	474	ref|XP_010087965.1| Citrate synthase [Morus notabilis]gb|EXB30975.1| Citrate synthase [Morus notabilis]	473	842	2174	0	410	473	0.86	421	473	0.89
comp69198_c0_seq1_10	377	ref|XP_010111720.1| Isocitrate dehydrogenase [NAD] regulatory subunit 1 [Morusnotabilis]gb|EXC31559.1| Isocitrate dehydrogenase [NAD] regulatory subunit 1 [Morusnotabilis]	366	659	1701	0	326	366	0.89	332	366	0.9
comp69198_c0_seq1_10	377	ref|XP_010111720.1| Isocitrate dehydrogenase [NAD] regulatory subunit 1 [Morusnotabilis]gb|EXC31559.1| Isocitrate dehydrogenase [NAD] regulatory subunit 1 [Morusnotabilis]	366	659	1701	0	326	366	0.89	332	366	0.9
comp76367_c0_seq1_25	1025	ref|XP_010096639.1| 2-oxoglutarate dehydrogenase [Morus notabilis]gb|EXB65307.1| 2-oxoglutarate dehydrogenase [Morus notabilis]	1020	1945	5038	0	921	1022	0.9	967	1022	0.94	2	1022	0
comp75496_c0_seq1_21	408	ref|XP_004497872.1| PREDICTED: protein tas-like [Cicer arietinum]	420	659	1700	0	308	356	0.86	333	356	0.93
comp80781_c1_seq1_35	547	ref|XP_006448845.1| hypothetical protein CICLE_v10018073mg [Citrus clementina]gb|ESR62085.1| hypothetical protein CICLE_v10018073mg [Citrus clementina]	535	755	1949	0	368	503	0.73	432	503	0.85	3	503	0
comp81942_c1_seq1_29	522	ref|XP_008368565.1| PREDICTED: dihydrolipoyl dehydrogenase, mitochondrial [Malusdomestica]	509	892	2304	0	441	514	0.85	469	514	0.91	11	514	0.02
comp79303_c0_seq1_5	196	ref|XP_010111095.1| Thioredoxin F-type [Morus notabilis]gb|EXC29957.1| Thioredoxin F-type [Morus notabilis]	184	250	638	2e-82	133	185	0.71	139	185	0.75	9	185	0.04
comp68857_c0_seq1_9	380	ref|XP_009593712.1| PREDICTED: probable protein disulfide-isomerase A6 [Nicotianatomentosiformis]	359	586	1510	0	282	359	0.78	304	359	0.84
comp68016_c0_seq1_16	611	ref|XP_007035804.1| ATP citrate lyase subunit B 2 isoform 1 [Theobroma cacao]gb|EOY06730.1| ATP citrate lyase subunit B 2 isoform 1 [Theobroma cacao]	608	1184	3062	0	571	608	0.93	588	608	0.96
comp68016_c0_seq1_16	611	ref|XP_007035804.1| ATP citrate lyase subunit B 2 isoform 1 [Theobroma cacao]gb|EOY06730.1| ATP citrate lyase subunit B 2 isoform 1 [Theobroma cacao]	608	1184	3062	0	571	608	0.93	588	608	0.96
comp67581_c0_seq1_38	610	ref|XP_002511819.1| malic enzyme, putative [Ricinus communis]gb|EEF50488.1| malic enzyme, putative [Ricinus communis]	602	1019	2634	0	484	584	0.82	520	584	0.89
comp78258_c0_seq1_5	363	ref|XP_004287950.1| PREDICTED: NADP-dependent alkenal double bond reductase P1-like[Fragaria vesca subsp. vesca]	357	525	1351	0	250	358	0.69	309	358	0.86	6	358	0.01
comp81430_c0_seq4_14	582	ref|XP_001699641.1| mitochondrial F1F0 ATP synthase, alpha subunit [Chlamydomonasreinhardtii]emb|CAA63864.1| H(+)-transporting ATP synthase [Chlamydomonas reinhardtii]gb|EDP07337.1| mitochondrial F1F0 ATP synthase, alpha subunit [Chlamydomonasreinhardtii]	569	952	2461	0	465	566	0.82	505	566	0.89	6	566	0.01
comp79950_c0_seq1_11	429	ref|XP_009629184.1| PREDICTED: ATP-citrate synthase alpha chain protein 2 [Nicotianatomentosiformis]	423	809	2090	0	388	423	0.91	404	423	0.95
comp86339_c0_seq1_28	360	ref|XP_010095297.1| putative protein disulfide-isomerase A6 [Morus notabilis]gb|EXB59326.1| putative protein disulfide-isomerase A6 [Morus notabilis]	360	601	1549	0	290	335	0.86	318	335	0.94
comp82587_c0_seq2_13	566	emb|CAN81654.1| hypothetical protein VITISV_003756 [Vitis vinifera]	539	674	1738	0	321	499	0.64	370	499	0.74	1	499	0
comp35475_c0_seq1_7	272	ref|XP_005651068.1| dihydrolipoamide succinyltransferase [Coccomyxa subellipsoideaC-169]gb|EIE26524.1| dihydrolipoamide succinyltransferase [Coccomyxa subellipsoideaC-169]	366	400	1027	1e-137	192	232	0.82	213	232	0.91
comp78487_c0_seq1_37	544	ref|XP_010100483.1| Aldehyde dehydrogenase family 2 member [Morus notabilis]gb|EXB82617.1| Aldehyde dehydrogenase family 2 member [Morus notabilis]	537	885	2286	0	418	514	0.81	461	514	0.89	2	514	0
comp63853_c0_seq1_7	328	ref|XP_008237076.1| PREDICTED: soluble inorganic pyrophosphatase 1, chloroplastic[Prunus mume]	297	503	1296	1e-178	252	301	0.83	268	301	0.89	14	301	0.04
comp62931_c0_seq2_10	121	ref|WP_006635059.1| MULTISPECIES: carbon dioxide-concentrating protein CcmK[Oscillatoriales]ref|YP_007117838.1| microcompartments protein [Oscillatoria nigro-viridis PCC 7112]gb|EGK84905.1| microcompartments protein [Microcoleus vaginatus FGP-2]gb|AFZ09422.1| microcompartments protein [Oscillatoria nigro-viridis PCC 7112]	103	203	516	3e-66	103	103	1	103	103	1
comp80334_c0_seq1_31	656	ref|XP_002302483.1| malate oxidoreductase family protein [Populus trichocarpa]gb|EEE81756.1| malate oxidoreductase family protein [Populus trichocarpa]	627	1058	2736	0	516	628	0.82	539	628	0.85	1	628	0
comp80032_c0_seq1_42	646	ref|XP_002267279.1| PREDICTED: V-type proton ATPase catalytic subunit A [Vitisvinifera]emb|CBI18438.3| unnamed protein product [Vitis vinifera]	623	1219	3155	0	588	623	0.94	600	623	0.96
comp83082_c0_seq1_15	562	ref|XP_010088671.1| Dihydrolipoyllysine-residue acetyltransferase component 2 ofpyruvate dehydrogenase complex [Morus notabilis]gb|EXB36838.1| Dihydrolipoyllysine-residue acetyltransferase component 2 ofpyruvate dehydrogenase complex [Morus notabilis]	516	815	2105	0	416	544	0.76	442	544	0.81	36	544	0.06
comp80911_c0_seq1_14	571	ref|XP_010101190.1| Aldehyde dehydrogenase family 2 member [Morus notabilis]gb|EXB87864.1| Aldehyde dehydrogenase family 2 member [Morus notabilis]	546	957	2475	0	454	505	0.89	482	505	0.95
comp74924_c0_seq1_39	709	ref|XP_010103454.1| NADH dehydrogenase [ubiquinone] iron-sulfur protein 1 [Morusnotabilis]gb|EXB95899.1| NADH dehydrogenase [ubiquinone] iron-sulfur protein 1 [Morusnotabilis]	749	1314	3400	0	632	691	0.91	653	691	0.94	2	691	0
comp36511_c0_seq1_37	570	ref|XP_010112301.1| Delta(24)-sterol reductase [Morus notabilis]gb|EXC33104.1| Delta(24)-sterol reductase [Morus notabilis]	567	1124	2908	0	530	567	0.93	555	567	0.97
comp78404_c0_seq2_46	509	ref|XP_010089047.1| Monodehydroascorbate reductase [Morus notabilis]gb|EXB37294.1| Monodehydroascorbate reductase [Morus notabilis]	491	831	2146	0	420	495	0.84	448	495	0.9	13	495	0.02
comp76656_c0_seq1_34	341	ref|XP_010104745.1| Malate dehydrogenase [Morus notabilis]gb|EXC01795.1| Malate dehydrogenase [Morus notabilis]	333	637	1642	0	309	333	0.92	314	333	0.94
comp920947_c0_seq1_4	119	ref|WP_017290237.1| carbon dioxide-concentrating protein CcmK [Leptolyngbya boryana]	113	223	567	6e-74	113	113	1	113	113	1
comp74991_c0_seq1_39	500	gb|AHG97672.1| glutathione reductase [Boehmeria nivea]	497	1017	2629	0	497	497	1	497	497	1
comp82374_c0_seq1_12	586	ref|XP_010098196.1| Protein disulfide isomerase-like 1-4 [Morus notabilis]gb|EXB74652.1| Protein disulfide isomerase-like 1-4 [Morus notabilis]	583	835	2157	0	423	587	0.72	465	587	0.79	12	587	0.02
comp82184_c0_seq1_15	570	ref|XP_007199787.1| hypothetical protein PRUPE_ppa003960mg [Prunus persica]gb|EMJ00986.1| hypothetical protein PRUPE_ppa003960mg [Prunus persica]	538	1009	2610	0	485	541	0.89	514	541	0.95	3	541	0
comp83032_c0_seq3_84	507	ref|XP_010111973.1| Betaine aldehyde dehydrogenase 1 [Morus notabilis]gb|EXC32247.1| Betaine aldehyde dehydrogenase 1 [Morus notabilis]	501	892	2306	0	446	503	0.88	466	503	0.92	2	503	0
comp82317_c1_seq2_12	559	ref|XP_010038031.1| PREDICTED: glutathione reductase, chloroplastic [Eucalyptusgrandis]gb|KCW49829.1| hypothetical protein EUGRSUZ_K03307 [Eucalyptus grandis]gb|KCW49830.1| hypothetical protein EUGRSUZ_K03307 [Eucalyptus grandis]	556	931	2405	0	457	559	0.81	495	559	0.88	17	559	0.03
comp80126_c0_seq1_28	360	ref|XP_004296671.1| PREDICTED: probable aldo-keto reductase 2-like [Fragaria vescasubsp. vesca]	342	535	1377	0	259	342	0.75	281	342	0.82	2	342	0
comp84406_c0_seq2_21	401	ref|XP_010094864.1| Uncharacterized protein ycf37 [Morus notabilis]gb|EXB57393.1| Uncharacterized protein ycf37 [Morus notabilis]	349	383	983	1e-129	191	233	0.81	207	233	0.88
comp85558_c0_seq2_44	350	ref|XP_007201943.1| hypothetical protein PRUPE_ppa004461mg [Prunus persica]gb|EMJ03142.1| hypothetical protein PRUPE_ppa004461mg [Prunus persica]	508	594	1532	0	287	339	0.84	309	339	0.91
comp59227_c1_seq1_24	357	ref|XP_010093710.1| L-lactate dehydrogenase A [Morus notabilis]gb|EXB54490.1| L-lactate dehydrogenase A [Morus notabilis]	350	625	1612	0	306	350	0.87	324	350	0.92
comp85714_c0_seq2_54	977	ref|XP_004144496.1| PREDICTED: aconitate hydratase, cytoplasmic-like [Cucumis sativus]gb|KGN43521.1| hypothetical protein Csa_7G043630 [Cucumis sativus]	989	1785	4622	0	853	925	0.92	883	925	0.95
comp604470_c0_seq1_2	112	ref|WP_017291454.1| thioredoxin [Leptolyngbya boryana]	107	221	563	1e-73	107	107	1	107	107	1
comp82623_c0_seq1_21	370	ref|XP_009800853.1| PREDICTED: hydroxyphenylpyruvate reductase-like [Nicotianasylvestris]	313	497	1279	1e-175	234	313	0.74	271	313	0.86
comp76280_c0_seq1_10	509	ref|XP_010088835.1| Aldehyde dehydrogenase family 2 member C4 [Morus notabilis]gb|EXB37032.1| Aldehyde dehydrogenase family 2 member C4 [Morus notabilis]	503	865	2235	0	421	504	0.83	456	504	0.9	2	504	0
comp79156_c0_seq1_29	381	ref|XP_010105494.1| ATP synthase subunit gamma [Morus notabilis]gb|EXC04880.1| ATP synthase subunit gamma [Morus notabilis]	326	587	1513	0	283	320	0.88	303	320	0.94	2	320	0
comp75494_c0_seq1_11	493	gb|AHY02156.1| ultraviolet-B receptor UVR8 [Betula platyphylla]	441	747	1928	0	360	443	0.81	390	443	0.88	2	443	0
comp42763_c0_seq1_6	156	ref|XP_006678916.1| calmodulin [Batrachochytrium dendrobatidis JAM81]gb|EGF80478.1| calmodulin [Batrachochytrium dendrobatidis JAM81]	169	274	700	8e-93	136	148	0.91	144	148	0.97
comp81167_c0_seq2_12	546	ref|XP_010103164.1| (R)-mandelonitrile lyase 2 [Morus notabilis]gb|EXB94929.1| (R)-mandelonitrile lyase 2 [Morus notabilis]	504	693	1788	0	333	503	0.66	395	503	0.78	2	503	0
comp84571_c0_seq2_47	811	ref|XP_010097930.1| 5-methyltetrahydropteroyltriglutamate--homocysteinemethyltransferase [Morus notabilis]gb|EXB73286.1| 5-methyltetrahydropteroyltriglutamate--homocysteinemethyltransferase [Morus notabilis]	765	1429	3698	0	680	765	0.88	714	765	0.93
comp75992_c0_seq1_29	484	ref|XP_010100270.1| Aspartate aminotransferase [Morus notabilis]gb|EXB82277.1| Aspartate aminotransferase [Morus notabilis]	463	808	2088	0	390	451	0.86	418	451	0.92	4	451	0
comp78800_c0_seq1_23	397	ref|XP_007033723.1| O-acetylserine lyase B isoform 1 [Theobroma cacao]gb|EOY04649.1| O-acetylserine lyase B isoform 1 [Theobroma cacao]	402	594	1532	0	307	394	0.77	326	394	0.82	15	394	0.03
comp76640_c0_seq1_11	498	ref|XP_010096539.1| Alanine aminotransferase 2 [Morus notabilis]gb|EXB64659.1| Alanine aminotransferase 2 [Morus notabilis]	537	919	2374	0	441	476	0.92	451	476	0.94
comp79941_c0_seq1_7	410	ref|XP_010088178.1| Aspartate-semialdehyde dehydrogenase [Morus notabilis]gb|EXB32318.1| Aspartate-semialdehyde dehydrogenase [Morus notabilis]	376	597	1540	0	288	376	0.76	323	376	0.85	1	376	0
comp47911_c0_seq1_28	461	ref|XP_005645012.1| pyrroline-5-carboxlyate synthetase [Coccomyxa subellipsoidea C-169]gb|EIE20468.1| pyrroline-5-carboxlyate synthetase [Coccomyxa subellipsoidea C-169]	778	521	1342	1e-176	271	429	0.63	317	429	0.73	9	429	0.02
comp77894_c1_seq1_8	431	ref|XP_010099191.1| Aminomethyltransferase [Morus notabilis]gb|EXB77063.1| Aminomethyltransferase [Morus notabilis]	407	806	2082	0	389	407	0.95	397	407	0.97
comp63933_c0_seq1_38	464	ref|XP_010093337.1| hypothetical protein L484_002939 [Morus notabilis]gb|EXB53900.1| hypothetical protein L484_002939 [Morus notabilis]	469	730	1884	0	349	438	0.79	389	438	0.88	19	438	0.04
comp60404_c0_seq1_4	292	ref|XP_003534533.1| PREDICTED: putative lactoylglutathione lyase-like isoform X1[Glycine max]	296	526	1354	0	248	273	0.9	265	273	0.97
comp84285_c0_seq2_11	466	ref|XP_010092799.1| Pyruvate decarboxylase isozyme 2 [Morus notabilis]gb|EXB52385.1| Pyruvate decarboxylase isozyme 2 [Morus notabilis]	606	912	2358	0	433	466	0.92	451	466	0.96
comp84285_c0_seq2_11	466	ref|XP_010092799.1| Pyruvate decarboxylase isozyme 2 [Morus notabilis]gb|EXB52385.1| Pyruvate decarboxylase isozyme 2 [Morus notabilis]	606	912	2358	0	433	466	0.92	451	466	0.96
comp81710_c0_seq1_33	1672	ref|XP_006494087.1| PREDICTED: ferredoxin-dependent glutamate synthase 1,chloroplastic/mitochondrial-like isoform X3 [Citrussinensis]	1620	2921	7573	0	1396	1604	0.87	1493	1604	0.93	12	1604	0
comp80998_c0_seq1_11	397	gb|KHG29839.1| Glutamine synthetase cytosolic isozyme 1-1 [Gossypium arboreum]	356	678	1750	0	323	342	0.94	336	342	0.98
comp79388_c1_seq1_7	399	ref|XP_010110277.1| Aspartate aminotransferase [Morus notabilis]gb|EXC25797.1| Aspartate aminotransferase [Morus notabilis]	394	720	1859	0	345	395	0.87	368	395	0.93	1	395	0
comp78330_c0_seq2_46	551	ref|XP_002323655.2| alanine:glyoxylate aminotransferase 3 family protein [Populustrichocarpa]gb|EEF05416.2| alanine:glyoxylate aminotransferase 3 family protein [Populustrichocarpa]	479	808	2088	0	384	481	0.79	418	481	0.86	2	481	0
comp78330_c0_seq2_46	551	ref|XP_002323655.2| alanine:glyoxylate aminotransferase 3 family protein [Populustrichocarpa]gb|EEF05416.2| alanine:glyoxylate aminotransferase 3 family protein [Populustrichocarpa]	479	808	2088	0	384	481	0.79	418	481	0.86	2	481	0
comp69198_c0_seq1_10	377	ref|XP_010111720.1| Isocitrate dehydrogenase [NAD] regulatory subunit 1 [Morusnotabilis]gb|EXC31559.1| Isocitrate dehydrogenase [NAD] regulatory subunit 1 [Morusnotabilis]	366	659	1701	0	326	366	0.89	332	366	0.9
comp55013_c0_seq1_6	266	ref|XP_010111828.1| hypothetical protein L484_020618 [Morus notabilis]gb|EXC31793.1| hypothetical protein L484_020618 [Morus notabilis]	236	385	990	1e-134	179	200	0.89	190	200	0.95
comp79654_c0_seq1_12	480	ref|XP_010089944.1| Aspartate aminotransferase [Morus notabilis]gb|EXB38640.1| Aspartate aminotransferase [Morus notabilis]	482	862	2228	0	415	461	0.9	433	461	0.93	16	461	0.03
comp42964_c0_seq1_18	222	ref|XP_007051217.1| Nitrogen regulatory protein P-II [Theobroma cacao]gb|EOX95374.1| Nitrogen regulatory protein P-II [Theobroma cacao]	198	257	656	2e-84	130	160	0.81	142	160	0.88	3	160	0.01
comp82215_c1_seq1_16	596	ref|XP_010103164.1| (R)-mandelonitrile lyase 2 [Morus notabilis]gb|EXB94929.1| (R)-mandelonitrile lyase 2 [Morus notabilis]	504	701	1809	0	336	498	0.67	398	498	0.79	1	498	0
comp77041_c0_seq1_27	429	ref|XP_002525427.1| glutamate dehydrogenase, putative [Ricinus communis]gb|EEF36917.1| glutamate dehydrogenase, putative [Ricinus communis]	411	807	2084	0	387	411	0.94	400	411	0.97
comp86110_c0_seq1_27	400	ref|XP_010103463.1| Glutamine synthetase nodule isozyme [Morus notabilis]gb|EXB95908.1| Glutamine synthetase nodule isozyme [Morus notabilis]	356	679	1753	0	325	342	0.95	334	342	0.97
comp86777_c0_seq1_4	110	ref|XP_010099692.1| Glutamate decarboxylase [Morus notabilis]gb|EXB80269.1| Glutamate decarboxylase [Morus notabilis]	499	220	560	4e-68	104	110	0.94	108	110	0.98
comp72016_c0_seq2_7	383	ref|XP_008393841.1| PREDICTED: uncharacterized protein LOC103455998 [Malus domestica]ref|XP_008367675.1| PREDICTED: uncharacterized protein LOC103431309 [Malus domestica]	717	539	1388	0	259	354	0.73	290	354	0.81	10	354	0.02
comp81293_c0_seq1_14	529	ref|XP_006426223.1| hypothetical protein CICLE_v10025372mg [Citrus clementina]ref|XP_006426225.1| hypothetical protein CICLE_v10025372mg [Citrus clementina]gb|ESR39463.1| hypothetical protein CICLE_v10025372mg [Citrus clementina]gb|ESR39465.1| hypothetical protein CICLE_v10025372mg [Citrus clementina]	517	976	2522	0	471	517	0.91	485	517	0.93
comp85993_c0_seq1_8	333	ref|XP_010023584.1| PREDICTED: spermidine synthase 1 [Eucalyptus grandis]gb|KCW59895.1| hypothetical protein EUGRSUZ_H02622 [Eucalyptus grandis]	341	565	1456	0	277	339	0.81	304	339	0.89	13	339	0.03
comp84807_c0_seq1_10	483	ref|XP_010023651.1| PREDICTED: serine hydroxymethyltransferase 4 [Eucalyptus grandis]gb|KCW59954.1| hypothetical protein EUGRSUZ_H02679 [Eucalyptus grandis]	471	930	2403	0	440	471	0.93	459	471	0.97
comp77182_c1_seq1_9	407	gb|KHG29969.1| Serine--glyoxylate aminotransferase -like protein [Gossypiumarboreum]	401	724	1869	0	348	401	0.86	365	401	0.91
comp83368_c0_seq1_31	449	ref|XP_010101721.1| Serine carboxypeptidase-like 50 [Morus notabilis]gb|EXB89385.1| Serine carboxypeptidase-like 50 [Morus notabilis]	447	557	1435	0	276	405	0.68	325	405	0.8	9	405	0.02
comp61251_c0_seq1_18	810	ref|XP_010105127.1| Oligopeptidase A [Morus notabilis]gb|EXC03912.1| Oligopeptidase A [Morus notabilis]	811	1310	3391	0	649	808	0.8	691	808	0.85	15	808	0.01
comp77053_c0_seq1_7	379	ref|XP_008373270.1| PREDICTED: phospho-2-dehydro-3-deoxyheptonate aldolase 2,chloroplastic-like [Malus domestica]	518	738	1906	0	347	379	0.91	360	379	0.94
comp39387_c0_seq2_49	580	ref|XP_010108431.1| Pyruvate decarboxylase isozyme 1 [Morus notabilis]gb|EXC19459.1| Pyruvate decarboxylase isozyme 1 [Morus notabilis]	589	1022	2642	0	481	534	0.9	514	534	0.96
comp14026_c0_seq1_2	125	gb|KHF99832.1| Aspartyl aminopeptidase [Gossypium arboreum]	463	127	318	1e-32	64	129	0.49	87	129	0.67	4	129	0.03
comp86594_c0_seq1_4	115	ref|XP_006652335.1| PREDICTED: glutamate decarboxylase 4-like [Oryza brachyantha]	484	222	566	4e-69	99	115	0.86	108	115	0.93
comp69316_c0_seq1_10	312	ref|XP_010094006.1| hypothetical protein L484_007352 [Morus notabilis]gb|EXB55021.1| hypothetical protein L484_007352 [Morus notabilis]	237	451	1161	1e-159	216	237	0.91	228	237	0.96
comp81828_c0_seq1_59	1091	ref|XP_009361863.1| PREDICTED: glycine dehydrogenase (decarboxylating), mitochondrialisoform X1 [Pyrus x bretschneideri]ref|XP_009361876.1| PREDICTED: glycine dehydrogenase (decarboxylating), mitochondrialisoform X3 [Pyrus x bretschneideri]	1049	1800	4662	0	867	1053	0.82	929	1053	0.88	11	1053	0.01
comp73788_c0_seq1_24	284	gb|KHG29245.1| leuD [Gossypium arboreum]	259	312	800	1e-104	149	179	0.83	156	179	0.87
comp79178_c0_seq1_12	499	ref|XP_008243055.1| PREDICTED: acetolactate synthase small subunit 2, chloroplasticisoform X2 [Prunus mume]	494	708	1828	0	343	409	0.83	377	409	0.92
comp60113_c0_seq1_43	607	ref|XP_004287197.1| PREDICTED: methylenetetrahydrofolate reductase 2-like [Fragariavesca subsp. vesca]	595	1107	2863	0	519	594	0.87	560	594	0.94	2	594	0
comp78105_c0_seq1_34	572	ref|XP_008224581.1| PREDICTED: putative dihydroxy-acid dehydratase, mitochondrial[Prunus mume]	618	1014	2623	0	487	557	0.87	520	557	0.93
comp83597_c0_seq1_56	1092	ref|XP_010088690.1| Methionine S-methyltransferase [Morus notabilis]gb|EXB36871.1| Methionine S-methyltransferase [Morus notabilis]	1068	1828	4734	0	894	1087	0.82	959	1087	0.88	31	1087	0.02
comp78989_c0_seq1_11	499	ref|XP_002517289.1| serine carboxypeptidase, putative [Ricinus communis]gb|EEF45082.1| serine carboxypeptidase, putative [Ricinus communis]	464	719	1856	0	330	453	0.72	393	453	0.86	2	453	0
comp70846_c0_seq1_11	461	gb|ABK24282.1| unknown [Picea sitchensis]	415	547	1409	0	262	389	0.67	315	389	0.8	3	389	0
comp74685_c0_seq1_14	159	gb|AFK36203.1| unknown [Lotus japonicus]	155	278	710	2e-94	131	155	0.84	143	155	0.92
comp85924_c0_seq1_17	489	ref|XP_010100388.1| Glutamate--glyoxylate aminotransferase 2 [Morus notabilis]gb|EXB82522.1| Glutamate--glyoxylate aminotransferase 2 [Morus notabilis]	481	950	2455	0	455	481	0.94	471	481	0.97
comp56765_c0_seq1_25	423	ref|XP_010087942.1| Cysteine synthase [Morus notabilis]gb|EXB30864.1| Cysteine synthase [Morus notabilis]	372	662	1708	0	325	375	0.86	340	375	0.9	8	375	0.02
comp83973_c0_seq1_49	831	ref|XP_010101294.1| Prolyl endopeptidase [Morus notabilis]gb|EXB88229.1| Prolyl endopeptidase [Morus notabilis]	729	1389	3596	0	658	730	0.9	694	730	0.95	1	730	0
comp83973_c0_seq1_49	831	ref|XP_010101294.1| Prolyl endopeptidase [Morus notabilis]gb|EXB88229.1| Prolyl endopeptidase [Morus notabilis]	729	1389	3596	0	658	730	0.9	694	730	0.95	1	730	0
comp74466_c0_seq1_37	589	ref|XP_008244478.1| PREDICTED: ketol-acid reductoisomerase, chloroplastic [Prunus mume]	588	1003	2592	0	481	566	0.84	513	566	0.9	4	566	0
comp76258_c0_seq1_16	992	ref|XP_010089082.1| Aminopeptidase N [Morus notabilis]gb|EXB37329.1| Aminopeptidase N [Morus notabilis]	948	1633	4228	0	795	964	0.82	844	964	0.87	24	964	0.02
comp68734_c0_seq1_25	377	ref|XP_010099028.1| hypothetical protein L484_005320 [Morus notabilis]gb|EXB76386.1| hypothetical protein L484_005320 [Morus notabilis]	375	669	1725	0	315	372	0.84	348	372	0.93	1	372	0
comp61727_c0_seq1_10	408	ref|XP_010102790.1| Glutamine-dependent asparagine synthetase 2 [Morus notabilis]gb|EXB94103.1| Glutamine-dependent asparagine synthetase 2 [Morus notabilis]	577	753	1943	0	357	406	0.87	375	406	0.92
comp76590_c0_seq1_31	432	ref|XP_010105702.1| Glutamine synthetase leaf isozyme [Morus notabilis]gb|EXC05733.1| Glutamine synthetase leaf isozyme [Morus notabilis]	433	791	2044	0	372	433	0.85	404	433	0.93	3	433	0
comp83152_c0_seq2_37	590	ref|XP_010096469.1| Bifunctional 3-dehydroquinate dehydratase/shikimate dehydrogenase[Morus notabilis]gb|EXB64479.1| Bifunctional 3-dehydroquinate dehydratase/shikimate dehydrogenase[Morus notabilis]	622	840	2171	0	405	495	0.81	439	495	0.88	2	495	0
comp83152_c0_seq2_37	590	ref|XP_010096469.1| Bifunctional 3-dehydroquinate dehydratase/shikimate dehydrogenase[Morus notabilis]gb|EXB64479.1| Bifunctional 3-dehydroquinate dehydratase/shikimate dehydrogenase[Morus notabilis]	622	840	2171	0	405	495	0.81	439	495	0.88	2	495	0
comp71613_c0_seq9_42	936	ref|XP_010094965.1| Puromycin-sensitive aminopeptidase [Morus notabilis]gb|EXB57658.1| Puromycin-sensitive aminopeptidase [Morus notabilis]	870	1488	3852	0	726	878	0.82	783	878	0.89	12	878	0.01
comp84760_c0_seq1_56	587	ref|XP_010103674.1| Leucine aminopeptidase 3 [Morus notabilis]gb|EXB96617.1| Leucine aminopeptidase 3 [Morus notabilis]	579	922	2384	0	460	553	0.83	478	553	0.86	1	553	0
comp76647_c0_seq1_11	608	ref|XP_004496955.1| PREDICTED: d-3-phosphoglycerate dehydrogenase, chloroplastic-likeisoform X1 [Cicer arietinum]ref|XP_004496956.1| PREDICTED: d-3-phosphoglycerate dehydrogenase, chloroplastic-likeisoform X2 [Cicer arietinum]	596	929	2401	0	462	553	0.83	488	553	0.88
comp30581_c0_seq1_7	432	ref|XP_010097115.1| Phosphoribosylformylglycinamidine cyclo-ligase [Morus notabilis]gb|EXB66976.1| Phosphoribosylformylglycinamidine cyclo-ligase [Morus notabilis]	426	570	1468	0	282	319	0.88	296	319	0.92
comp79366_c0_seq1_27	430	ref|XP_010110407.1| Phosphoribulokinase [Morus notabilis]gb|EXC26239.1| Phosphoribulokinase [Morus notabilis]	411	736	1901	0	363	415	0.87	377	415	0.9	15	415	0.03
comp73128_c0_seq1_16	215	gb|ADB85102.1| nucleoside diphosphate kinase B [Jatropha curcas]gb|KDP28873.1| hypothetical protein JCGZ_14644 [Jatropha curcas]	148	287	735	2e-97	136	148	0.91	144	148	0.97
comp73929_c1_seq1_10	255	ref|XP_010093431.1| Nucleoside diphosphate kinase IV [Morus notabilis]gb|EXB54041.1| Nucleoside diphosphate kinase IV [Morus notabilis]	233	375	964	1e-130	181	237	0.76	200	237	0.84	4	237	0.01
comp79676_c1_seq1_14	649	ref|XP_002297654.1| 10-formyltetrahydrofolate synthetase family protein [Populustrichocarpa]gb|EEE82459.1| 10-formyltetrahydrofolate synthetase family protein [Populustrichocarpa]	636	1117	2888	0	537	636	0.84	570	636	0.89
comp57820_c0_seq1_15	254	ref|XP_006440074.1| hypothetical protein CICLE_v10021896mg [Citrus clementina]ref|XP_006476999.1| PREDICTED: adenylate kinase B-like [Citrus sinensis]gb|ESR53314.1| hypothetical protein CICLE_v10021896mg [Citrus clementina]gb|KDO52598.1| hypothetical protein CISIN_1g025529mg [Citrus sinensis]	246	472	1215	1e-168	226	243	0.93	236	243	0.97
comp82467_c0_seq2_28	493	ref|XP_010095961.1| Uridine 5'-monophosphate synthase [Morus notabilis]gb|EXB62654.1| Uridine 5'-monophosphate synthase [Morus notabilis]	478	778	2008	0	380	476	0.79	414	476	0.86	2	476	0
comp82467_c0_seq2_28	493	ref|XP_010095961.1| Uridine 5'-monophosphate synthase [Morus notabilis]gb|EXB62654.1| Uridine 5'-monophosphate synthase [Morus notabilis]	478	778	2008	0	380	476	0.79	414	476	0.86	2	476	0
comp79838_c0_seq1_8	462	ref|XP_010103622.1| Dihydroorotate dehydrogenase (quinone) [Morus notabilis]gb|EXB96399.1| Dihydroorotate dehydrogenase (quinone) [Morus notabilis]	455	846	2186	0	416	456	0.91	432	456	0.94	1	456	0
comp27750_c0_seq2_7	165	ref|XP_007202700.1| hypothetical protein PRUPE_ppa012689mg [Prunus persica]gb|EMJ03899.1| hypothetical protein PRUPE_ppa012689mg [Prunus persica]	158	239	611	3e-79	116	158	0.73	127	158	0.8	1	158	0
comp1470507_c0_seq1_2	78	ref|WP_015180336.1| IMP dehydrogenase family protein [Microcoleus sp. PCC 7113]ref|YP_007119578.1| IMP dehydrogenase family protein [Microcoleus sp. PCC 7113]gb|AFZ16172.1| IMP dehydrogenase family protein [Microcoleus sp. PCC 7113]	393	124	312	7e-33	64	78	0.82	66	78	0.84
comp48511_c0_seq2_4	222	gb|ABL61361.1| ribulose-1,5-bisphosphate carboxylase/oxygenase large subunit,partial (chloroplast) [Haematococcus zimbabwiensis]	379	414	1063	1e-144	200	218	0.91	202	218	0.92
comp72139_c0_seq1_27	397	ref|XP_010036726.1| PREDICTED: fructose-bisphosphate aldolase, cytoplasmic isozyme[Eucalyptus grandis]gb|KCW48360.1| hypothetical protein EUGRSUZ_K02073 [Eucalyptus grandis]	358	676	1743	0	329	358	0.91	339	358	0.94
comp83131_c3_seq1_40	773	ref|XP_010098926.1| Transketolase [Morus notabilis]gb|EXB76228.1| Transketolase [Morus notabilis]	746	1272	3291	0	615	731	0.84	646	731	0.88	3	731	0
comp858059_c0_seq1_3	85	emb|CCG54818.1| ribulose bisphosphate carboxylase (Rubisco) green-like, partial[uncultured bacterium]	172	166	419	4e-51	77	80	0.96	79	80	0.98
comp68764_c0_seq1_34	459	ref|XP_008237955.1| PREDICTED: glyceraldehyde-3-phosphate dehydrogenase B,chloroplastic [Prunus mume]	452	825	2132	0	402	452	0.88	415	452	0.91
comp85102_c1_seq1_6	433	ref|XP_007202080.1| hypothetical protein PRUPE_ppa007396mg [Prunus persica]gb|EMJ03279.1| hypothetical protein PRUPE_ppa007396mg [Prunus persica]	369	490	1262	1e-170	248	345	0.71	285	345	0.82	6	345	0.01
comp79217_c0_seq1_7	343	ref|XP_006443006.1| hypothetical protein CICLE_v10021105mg [Citrus clementina]ref|XP_006478719.1| PREDICTED: probable fructokinase-4-like [Citrus sinensis]gb|ESR56246.1| hypothetical protein CICLE_v10021105mg [Citrus clementina]	329	571	1471	0	280	317	0.88	292	317	0.92
comp76238_c0_seq1_10	350	ref|XP_009368895.1| PREDICTED: adenosine kinase 2 [Pyrus x bretschneideri]	341	651	1680	0	307	339	0.9	326	339	0.96
comp67924_c0_seq1_11	422	ref|XP_010090946.1| Glyceraldehyde-3-phosphate dehydrogenase A [Morus notabilis]gb|EXB41431.1| Glyceraldehyde-3-phosphate dehydrogenase A [Morus notabilis]	404	600	1546	0	299	371	0.8	311	371	0.83	3	371	0
comp61993_c0_seq1_28	566	ref|XP_010113038.1| 2,3-bisphosphoglycerate-independent phosphoglycerate mutase [Morusnotabilis]gb|EXC35209.1| 2,3-bisphosphoglycerate-independent phosphoglycerate mutase [Morusnotabilis]	559	1039	2686	0	502	559	0.89	526	559	0.94
comp83522_c1_seq2_10	518	ref|XP_010111634.1| Glucose-6-phosphate 1-dehydrogenase, cytoplasmic isoform 2 [Morusnotabilis]gb|EXC31379.1| Glucose-6-phosphate 1-dehydrogenase, cytoplasmic isoform 2 [Morusnotabilis]	517	986	2549	0	475	517	0.91	494	517	0.95
comp54150_c0_seq1_13	480	ref|XP_010101050.1| UTP--glucose-1-phosphate uridylyltransferase [Morus notabilis]gb|EXB86760.1| UTP--glucose-1-phosphate uridylyltransferase [Morus notabilis]	688	855	2210	0	418	470	0.88	438	470	0.93
comp420243_c0_seq1_2	97	ref|NP_001172597.1| Os01g0791033 [Oryza sativa Japonica Group]dbj|BAH91327.1| Os01g0791033 [Oryza sativa Japonica Group]	262	205	522	2e-65	97	97	1	97	97	1
comp69477_c0_seq1_17	218	ref|XP_008242483.1| PREDICTED: hexokinase-1 [Prunus mume]	498	363	932	1e-122	176	217	0.81	186	217	0.85
comp79849_c0_seq1_31	527	ref|XP_010107371.1| Glucose-1-phosphate adenylyltransferase small subunit [Morusnotabilis]gb|EXC15622.1| Glucose-1-phosphate adenylyltransferase small subunit [Morusnotabilis]	522	933	2412	0	469	525	0.89	483	525	0.92	3	525	0
comp55270_c0_seq1_24	352	dbj|BAN45710.1| putative glycelaldehyde-3-phosphate dehydrogenase, partial [Pyruspyrifolia var. culta]	334	578	1489	0	279	322	0.86	294	322	0.91
comp84285_c0_seq2_11	466	ref|XP_010092799.1| Pyruvate decarboxylase isozyme 2 [Morus notabilis]gb|EXB52385.1| Pyruvate decarboxylase isozyme 2 [Morus notabilis]	606	912	2358	0	433	466	0.92	451	466	0.96
comp39370_c0_seq1_9	427	gb|AER26531.1| fructose 1,6 bisphosphate aldolase class 1 [Carica papaya]	396	710	1832	0	347	386	0.89	356	386	0.92	3	386	0
comp84247_c0_seq2_11	619	ref|XP_010101975.1| Phosphoglucomutase [Morus notabilis]gb|EXB90899.1| Phosphoglucomutase [Morus notabilis]	582	1113	2880	0	535	582	0.91	551	582	0.94
comp84247_c0_seq2_11	619	ref|XP_010101975.1| Phosphoglucomutase [Morus notabilis]gb|EXB90899.1| Phosphoglucomutase [Morus notabilis]	582	1113	2880	0	535	582	0.91	551	582	0.94
comp71397_c0_seq2_16	486	ref|XP_007022578.1| Phosphoglycerate kinase 1 [Theobroma cacao]gb|EOY14103.1| Phosphoglycerate kinase 1 [Theobroma cacao]	491	784	2025	0	402	440	0.91	411	440	0.93	3	440	0
comp64376_c0_seq1_27	428	ref|XP_010094705.1| Phosphoglycerate kinase [Morus notabilis]gb|EXB56751.1| Phosphoglycerate kinase [Morus notabilis]	401	714	1842	0	359	401	0.89	375	401	0.93
comp75310_c0_seq1_31	425	ref|XP_010093027.1| Sedoheptulose-1,7-bisphosphatase [Morus notabilis]gb|EXB53355.1| Sedoheptulose-1,7-bisphosphatase [Morus notabilis]	393	681	1758	0	335	393	0.85	350	393	0.89	1	393	0
comp76062_c0_seq1_10	522	ref|XP_002273684.2| PREDICTED: furcatin hydrolase [Vitis vinifera]emb|CBI24931.3| unnamed protein product [Vitis vinifera]	506	517	1331	1e-177	265	508	0.52	340	508	0.66	17	508	0.03
comp66481_c0_seq1_10	409	ref|XP_007030576.1| GDP-mannose 3,5-epimerase 1 [Theobroma cacao]gb|EOY11078.1| GDP-mannose 3,5-epimerase 1 [Theobroma cacao]	426	753	1944	0	357	384	0.92	364	384	0.94
comp83413_c0_seq2_18	607	ref|XP_010090866.1| putative pectinesterase/pectinesterase inhibitor 51 [Morusnotabilis]gb|EXB40991.1| putative pectinesterase/pectinesterase inhibitor 51 [Morusnotabilis]	567	836	2160	0	404	522	0.77	437	522	0.83	8	522	0.01
comp85015_c0_seq1_55	946	ref|XP_010103777.1| hypothetical protein L484_014667 [Morus notabilis]gb|EXB97055.1| hypothetical protein L484_014667 [Morus notabilis]	932	1595	4130	0	758	913	0.83	822	913	0.9	6	913	0
comp69390_c0_seq1_6	464	ref|XP_010103561.1| Pyruvate kinase, cytosolic isozyme [Morus notabilis]gb|EXB96338.1| Pyruvate kinase, cytosolic isozyme [Morus notabilis]	517	915	2366	0	449	471	0.95	456	471	0.96	7	471	0.01
comp75074_c0_seq1_16	519	ref|XP_010105293.1| Pyruvate kinase, cytosolic isozyme [Morus notabilis]gb|EXC04258.1| Pyruvate kinase, cytosolic isozyme [Morus notabilis]	506	967	2499	0	469	493	0.95	480	493	0.97
comp86214_c1_seq1_27	323	ref|XP_004142064.1| PREDICTED: uncharacterized protein At2g37660, chloroplastic-like[Cucumis sativus]gb|KGN54259.1| hypothetical protein Csa_4G296130 [Cucumis sativus]	326	491	1263	1e-173	251	335	0.74	276	335	0.82	23	335	0.06
comp76748_c0_seq1_11	527	gb|KDP24308.1| hypothetical protein JCGZ_25604 [Jatropha curcas]	488	905	2339	0	439	481	0.91	461	481	0.95	1	481	0
comp44971_c0_seq1_6	189	ref|WP_015179212.1| ribulose 1,5-bisphosphate carboxylase large subunit [Oscillatorianigro-viridis]ref|YP_007118427.1| ribulose 1,5-bisphosphate carboxylase large subunit [Oscillatorianigro-viridis PCC 7112]gb|AFZ10011.1| ribulose 1,5-bisphosphate carboxylase large subunit [Oscillatorianigro-viridis PCC 7112]	476	249	637	1e-78	129	177	0.72	129	177	0.72
comp59412_c0_seq1_14	548	ref|XP_010110656.1| hypothetical protein L484_004573 [Morus notabilis]gb|EXC27501.1| hypothetical protein L484_004573 [Morus notabilis]	499	917	2371	0	443	500	0.88	465	500	0.93	1	500	0
comp40646_c0_seq1_35	638	ref|XP_003592358.1| Phosphoglucomutase [Medicago truncatula]gb|AES62609.1| phosphogluco-mutase [Medicago truncatula]	628	1039	2687	0	498	575	0.86	530	575	0.92
comp40646_c0_seq1_35	638	ref|XP_003592358.1| Phosphoglucomutase [Medicago truncatula]gb|AES62609.1| phosphogluco-mutase [Medicago truncatula]	628	1039	2687	0	498	575	0.86	530	575	0.92
comp38992_c0_seq1_11	543	gb|KDP29239.1| hypothetical protein JCGZ_16628 [Jatropha curcas]	527	1019	2635	0	488	527	0.92	515	527	0.97
comp79756_c0_seq1_20	348	ref|XP_008223104.1| PREDICTED: uncharacterized protein LOC103322925 isoform X2 [Prunusmume]	338	485	1249	1e-170	237	340	0.69	270	340	0.79	12	340	0.03
comp81346_c0_seq2_16	946	ref|XP_008231241.1| PREDICTED: lysosomal alpha-mannosidase isoform X1 [Prunus mume]ref|XP_008231242.1| PREDICTED: lysosomal alpha-mannosidase isoform X1 [Prunus mume]	1024	1566	4056	0	737	914	0.8	816	914	0.89	5	914	0
comp76007_c0_seq1_37	311	ref|XP_010092887.1| Acidic endochitinase [Morus notabilis]gb|EXB52705.1| Acidic endochitinase [Morus notabilis]	298	498	1282	1e-177	239	282	0.84	255	282	0.9	3	282	0.01
comp79976_c0_seq1_5	286	ref|XP_007205760.1| hypothetical protein PRUPE_ppa010312mg [Prunus persica]gb|EMJ06959.1| hypothetical protein PRUPE_ppa010312mg [Prunus persica]	254	421	1081	1e-147	208	252	0.82	219	252	0.86
comp67591_c0_seq1_8	433	ref|XP_010098150.1| hypothetical protein L484_026284 [Morus notabilis]gb|EXB74587.1| hypothetical protein L484_026284 [Morus notabilis]	499	753	1944	0	361	433	0.83	393	433	0.9
comp97032_c0_seq1_10	549	ref|XP_010646460.1| PREDICTED: beta-hexosaminidase 3-like [Vitis vinifera]	522	790	2041	0	377	509	0.74	428	509	0.84	13	509	0.02
comp84953_c0_seq1_57	738	ref|XP_008239664.1| PREDICTED: HIPL1 protein isoform X1 [Prunus mume]	696	984	2544	0	473	649	0.72	525	649	0.8	2	649	0
comp84395_c0_seq5_21	685	ref|XP_010103976.1| Lysosomal beta glucosidase [Morus notabilis]gb|EXB97679.1| Lysosomal beta glucosidase [Morus notabilis]	669	1137	2940	0	542	651	0.83	584	651	0.89	2	651	0
comp218414_c0_seq1_3	152	gb|AFA51659.1| ribulose-1,5-bisphosphate carboxylase/oxygenase large subunit,partial (chloroplast) [Scenedesmus sp. LU1]	214	313	803	1e-108	150	152	0.98	151	152	0.99
comp83609_c0_seq1_17	313	ref|XP_010090264.1| DNA-damage-repair/toleration protein [Morus notabilis]gb|EXB39202.1| DNA-damage-repair/toleration protein [Morus notabilis]	309	450	1158	1e-157	217	302	0.71	245	302	0.81	8	302	0.02
comp83073_c0_seq2_32	530	ref|XP_010097587.1| Beta-glucosidase 44 [Morus notabilis]gb|EXB69119.1| Beta-glucosidase 44 [Morus notabilis]	512	850	2196	0	403	522	0.77	440	522	0.84	10	522	0.01
comp42525_c0_seq1_11	392	gb|ACA35006.1| glyceraldehyde-3-phosphate dehydrogenase [Dunaliella salina]	376	535	1379	0	265	378	0.7	299	378	0.79	2	378	0
comp39387_c0_seq2_49	580	ref|XP_010108431.1| Pyruvate decarboxylase isozyme 1 [Morus notabilis]gb|EXC19459.1| Pyruvate decarboxylase isozyme 1 [Morus notabilis]	589	1022	2642	0	481	534	0.9	514	534	0.96
comp83725_c0_seq1_16	656	ref|XP_006487803.1| PREDICTED: lysosomal beta glucosidase-like isoform X1 [Citrussinensis]ref|XP_006487804.1| PREDICTED: lysosomal beta glucosidase-like isoform X2 [Citrussinensis]	628	1043	2697	0	504	628	0.8	546	628	0.86	4	628	0
comp88089_c0_seq1_23	507	ref|XP_010095449.1| 6-phosphofructokinase 3 [Morus notabilis]gb|EXB60275.1| 6-phosphofructokinase 3 [Morus notabilis]	495	885	2287	0	431	492	0.87	450	492	0.91	9	492	0.01
comp199415_c0_seq1_6	97	gb|AEJ32835.1| ribulose-1,5-bisphosphate carboxylase/oxygenase large subunit,partial (chloroplast) [Acutodesmus deserticola]	437	206	525	9e-64	97	97	1	97	97	1
comp74948_c0_seq1_11	396	ref|XP_010092951.1| hypothetical protein L484_018888 [Morus notabilis]gb|EXB53004.1| hypothetical protein L484_018888 [Morus notabilis]	380	692	1787	0	338	381	0.88	355	381	0.93	1	381	0
comp74948_c0_seq1_11	396	ref|XP_010092951.1| hypothetical protein L484_018888 [Morus notabilis]gb|EXB53004.1| hypothetical protein L484_018888 [Morus notabilis]	380	692	1787	0	338	381	0.88	355	381	0.93	1	381	0
comp83553_c0_seq1_18	825	ref|XP_010111676.1| putative beta-D-xylosidase 5 [Morus notabilis]gb|EXC31467.1| putative beta-D-xylosidase 5 [Morus notabilis]	802	1228	3177	0	584	782	0.74	653	782	0.83	12	782	0.01
comp78319_c0_seq1_12	509	ref|XP_010086908.1| 6-phosphofructokinase 3 [Morus notabilis]gb|EXB24699.1| 6-phosphofructokinase 3 [Morus notabilis]	485	900	2326	0	438	482	0.9	459	482	0.95	2	482	0
comp84696_c1_seq1_21	336	ref|XP_010102170.1| putative xyloglucan endotransglucosylase/hydrolase protein 16[Morus notabilis]gb|EXB92420.1| putative xyloglucan endotransglucosylase/hydrolase protein 16[Morus notabilis]	289	530	1364	0	251	287	0.87	266	287	0.92	3	287	0.01
comp78105_c0_seq1_34	572	ref|XP_008224581.1| PREDICTED: putative dihydroxy-acid dehydratase, mitochondrial[Prunus mume]	618	1014	2623	0	487	557	0.87	520	557	0.93
comp84109_c0_seq3_22	312	ref|XP_008388033.1| PREDICTED: isoflavone reductase-like protein [Malus domestica]	308	442	1138	1e-154	214	308	0.69	251	308	0.81
comp82449_c0_seq1_31	313	ref|XP_004294178.1| PREDICTED: ribokinase-like [Fragaria vesca subsp. vesca]	377	332	852	1e-110	160	206	0.77	185	206	0.89	2	206	0
comp78283_c0_seq1_13	627	ref|XP_010094500.1| Pyrophosphate--fructose 6-phosphate 1-phosphotransferase subunitalpha [Morus notabilis]gb|EXB56254.1| Pyrophosphate--fructose 6-phosphate 1-phosphotransferase subunitalpha [Morus notabilis]	631	1138	2944	0	548	611	0.89	564	611	0.92	14	611	0.02
comp27750_c0_seq2_7	165	ref|XP_007202700.1| hypothetical protein PRUPE_ppa012689mg [Prunus persica]gb|EMJ03899.1| hypothetical protein PRUPE_ppa012689mg [Prunus persica]	158	239	611	3e-79	116	158	0.73	127	158	0.8	1	158	0
comp73406_c0_seq1_4	128	ref|XP_002946928.1| sedoheptulose-1,7-biphosphatase [Volvox carteri f. nagariensis]gb|EFJ52154.1| sedoheptulose-1,7-biphosphatase [Volvox carteri f. nagariensis]	388	223	567	4e-70	101	114	0.88	109	114	0.95
comp84469_c0_seq2_29	523	ref|XP_006483674.1| PREDICTED: vicianin hydrolase-like [Citrus sinensis]	519	666	1718	0	310	487	0.63	375	487	0.77
comp85106_c3_seq2_6	290	ref|XP_007040270.1| Plasma membrane intrinsic protein 1,4 isoform 3, partial [Theobromacacao]gb|EOY24771.1| Plasma membrane intrinsic protein 1,4 isoform 3, partial [Theobromacacao]	289	538	1385	0	257	288	0.89	278	288	0.96	1	288	0
comp69025_c0_seq2_25	330	ref|XP_010090892.1| putative 6-phosphogluconolactonase 4 [Morus notabilis]gb|EXB41097.1| putative 6-phosphogluconolactonase 4 [Morus notabilis]	323	445	1144	1e-155	225	278	0.8	238	278	0.85	3	278	0.01
comp79199_c0_seq1_34	395	ref|XP_002526308.1| fructose-bisphosphate aldolase, putative [Ricinus communis]gb|EEF36097.1| fructose-bisphosphate aldolase, putative [Ricinus communis]	394	754	1948	0	363	394	0.92	378	394	0.95
comp40099_c0_seq1_65	1091	ref|XP_007204296.1| hypothetical protein PRUPE_ppa000639mg [Prunus persica]gb|AFI57907.1| sucrose phosphate synthase 1f [Prunus persica]gb|EMJ05495.1| hypothetical protein PRUPE_ppa000639mg [Prunus persica]	1057	1859	4816	0	886	1057	0.83	958	1057	0.9	5	1057	0
comp84624_c0_seq1_53	897	ref|XP_010111783.1| Beta-galactosidase 9 [Morus notabilis]gb|EXC31697.1| Beta-galactosidase 9 [Morus notabilis]	932	1506	3898	0	709	899	0.78	780	899	0.86	21	899	0.02
comp86959_c0_seq1_67	1439	ref|XP_010100417.1| Alpha-glucan water dikinase [Morus notabilis]gb|EXB82551.1| Alpha-glucan water dikinase [Morus notabilis]	1436	2174	5632	0	1084	1468	0.73	1202	1468	0.81	90	1468	0.06
comp59186_c0_seq1_35	589	ref|XP_010107738.1| Pyruvate kinase isozyme A [Morus notabilis]gb|EXC16773.1| Pyruvate kinase isozyme A [Morus notabilis]	587	1028	2659	0	518	598	0.86	535	598	0.89	22	598	0.03
comp77070_c0_seq1_28	417	ref|XP_010101845.1| Fructose-1,6-bisphosphatase [Morus notabilis]gb|EXB89982.1| Fructose-1,6-bisphosphatase [Morus notabilis]	413	641	1654	0	320	385	0.83	330	385	0.85	5	385	0.01
comp41887_c0_seq2_11	185	ref|XP_002947186.1| hypothetical protein VOLCADRAFT_79447 [Volvox carteri f.nagariensis]gb|EFJ51776.1| hypothetical protein VOLCADRAFT_79447 [Volvox carteri f.nagariensis]	377	361	926	1e-123	168	185	0.9	175	185	0.94
comp83550_c0_seq21_10	367	ref|XP_009356954.1| PREDICTED: beta-glucosidase 11-like isoform X1 [Pyrus xbretschneideri]	507	442	1137	1e-150	205	297	0.69	244	297	0.82	2	297	0
comp85946_c0_seq1_15	615	ref|XP_010100225.1| Granule-bound starch synthase 1 [Morus notabilis]gb|EXB81896.1| Granule-bound starch synthase 1 [Morus notabilis]	611	961	2484	0	462	614	0.75	530	614	0.86	4	614	0
comp83830_c0_seq1_47	686	ref|XP_007217348.1| hypothetical protein PRUPE_ppa020892mg [Prunus persica]gb|EMJ18547.1| hypothetical protein PRUPE_ppa020892mg [Prunus persica]	697	1012	2617	0	479	654	0.73	557	654	0.85	18	654	0.02
comp76168_c0_seq1_13	622	ref|XP_007222012.1| hypothetical protein PRUPE_ppa002932mg [Prunus persica]gb|EMJ23211.1| hypothetical protein PRUPE_ppa002932mg [Prunus persica]	620	1046	2704	0	517	621	0.83	550	621	0.88	7	621	0.01
comp77761_c0_seq1_14	249	gb|KDP34186.1| hypothetical protein JCGZ_07757 [Jatropha curcas]	247	383	983	1e-133	191	244	0.78	206	244	0.84
comp84909_c0_seq5_22	524	ref|XP_008233320.1| PREDICTED: uncharacterized protein LOC103332366 isoform X2 [Prunusmume]	579	869	2246	0	425	500	0.85	454	500	0.9
comp68637_c0_seq1_20	391	ref|XP_004439996.1| PREDICTED: coproporphyrinogen-III oxidase, mitochondrial[Ceratotherium simum simum]	350	420	1079	1e-143	199	315	0.63	244	315	0.77	11	315	0.03
comp84285_c0_seq2_11	466	ref|XP_010092799.1| Pyruvate decarboxylase isozyme 2 [Morus notabilis]gb|EXB52385.1| Pyruvate decarboxylase isozyme 2 [Morus notabilis]	606	912	2358	0	433	466	0.92	451	466	0.96
comp84285_c0_seq2_11	466	ref|XP_010092799.1| Pyruvate decarboxylase isozyme 2 [Morus notabilis]gb|EXB52385.1| Pyruvate decarboxylase isozyme 2 [Morus notabilis]	606	912	2358	0	433	466	0.92	451	466	0.96
comp81976_c0_seq1_59	1116	ref|XP_010089531.1| Ubiquitin-activating enzyme E1 2 [Morus notabilis]gb|EXB37970.1| Ubiquitin-activating enzyme E1 2 [Morus notabilis]	1093	2035	5272	0	985	1094	0.9	1017	1094	0.92	3	1094	0
comp78330_c0_seq2_46	551	ref|XP_002323655.2| alanine:glyoxylate aminotransferase 3 family protein [Populustrichocarpa]gb|EEF05416.2| alanine:glyoxylate aminotransferase 3 family protein [Populustrichocarpa]	479	808	2088	0	384	481	0.79	418	481	0.86	2	481	0
comp100725_c0_seq1_20	347	ref|XP_002950429.1| hypothetical protein VOLCADRAFT_74602 [Volvox carteri f.nagariensis]gb|EFJ48630.1| hypothetical protein VOLCADRAFT_74602 [Volvox carteri f.nagariensis]	483	554	1427	0	263	322	0.81	285	322	0.88
comp80940_c0_seq2_13	605	ref|XP_010090263.1| Zeta-carotene desaturase [Morus notabilis]gb|EXB39201.1| Zeta-carotene desaturase [Morus notabilis]	581	1097	2837	0	538	581	0.92	561	581	0.96
comp82936_c0_seq2_26	404	ref|XP_002961973.1| hypothetical protein SELMODRAFT_164791 [Selaginella moellendorffii]ref|XP_002971113.1| hypothetical protein SELMODRAFT_267476 [Selaginella moellendorffii]ref|XP_002994729.1| hypothetical protein SELMODRAFT_139062 [Selaginella moellendorffii]gb|EFJ04207.1| hypothetical protein SELMODRAFT_139062 [Selaginella moellendorffii]gb|EFJ27711.1| hypothetical protein SELMODRAFT_267476 [S…	393	578	1490	0	285	386	0.73	316	386	0.81	5	386	0.01
comp39387_c0_seq2_49	580	ref|XP_010108431.1| Pyruvate decarboxylase isozyme 1 [Morus notabilis]gb|EXC19459.1| Pyruvate decarboxylase isozyme 1 [Morus notabilis]	589	1022	2642	0	481	534	0.9	514	534	0.96
comp39387_c0_seq2_49	580	ref|XP_010108431.1| Pyruvate decarboxylase isozyme 1 [Morus notabilis]gb|EXC19459.1| Pyruvate decarboxylase isozyme 1 [Morus notabilis]	589	1022	2642	0	481	534	0.9	514	534	0.96
comp87096_c0_seq1_10	431	ref|XP_010108425.1| Magnesium-chelatase subunit chlI [Morus notabilis]gb|EXC19453.1| Magnesium-chelatase subunit chlI [Morus notabilis]	418	693	1788	0	358	422	0.84	374	422	0.88	4	422	0
comp77476_c0_seq1_10	488	ref|XP_010093929.1| Glutamate-1-semialdehyde 2,1-aminomutase 1 [Morus notabilis]gb|EXB54892.1| Glutamate-1-semialdehyde 2,1-aminomutase 1 [Morus notabilis]	476	817	2111	0	399	462	0.86	419	462	0.9	1	462	0
comp78756_c1_seq1_14	576	ref|XP_008652021.1| PREDICTED: gamma aminobutyrate transaminase 3, chloroplastic [Zeamays]	515	902	2331	0	429	512	0.83	472	512	0.92	2	512	0
comp74466_c0_seq1_37	589	ref|XP_008244478.1| PREDICTED: ketol-acid reductoisomerase, chloroplastic [Prunus mume]	588	1003	2592	0	481	566	0.84	513	566	0.9	4	566	0
comp85771_c0_seq2_35	1440	ref|XP_010093208.1| Pleiotropic drug resistance protein 2 [Morus notabilis]gb|EXB53706.1| Pleiotropic drug resistance protein 2 [Morus notabilis]	1538	2507	6498	0	1216	1452	0.83	1291	1452	0.88	19	1452	0.01
comp85100_c0_seq1_46	573	emb|CBI34027.3| unnamed protein product [Vitis vinifera]	845	931	2405	0	452	558	0.81	498	558	0.89	3	558	0
comp85100_c0_seq1_46	573	emb|CBI34027.3| unnamed protein product [Vitis vinifera]	845	931	2405	0	452	558	0.81	498	558	0.89	3	558	0
comp82623_c0_seq1_21	370	ref|XP_009800853.1| PREDICTED: hydroxyphenylpyruvate reductase-like [Nicotianasylvestris]	313	497	1279	1e-175	234	313	0.74	271	313	0.86
comp72445_c3_seq1_13	350	ref|XP_010103952.1| Farnesyl pyrophosphate synthase 1 [Morus notabilis]gb|EXB97655.1| Farnesyl pyrophosphate synthase 1 [Morus notabilis]	342	635	1639	0	304	342	0.88	323	342	0.94
comp76647_c0_seq1_11	608	ref|XP_004496955.1| PREDICTED: d-3-phosphoglycerate dehydrogenase, chloroplastic-likeisoform X1 [Cicer arietinum]ref|XP_004496956.1| PREDICTED: d-3-phosphoglycerate dehydrogenase, chloroplastic-likeisoform X2 [Cicer arietinum]	596	929	2401	0	462	553	0.83	488	553	0.88
comp80580_c0_seq1_27	427	ref|XP_010088359.1| Acetyl-CoA acetyltransferase, cytosolic 1 [Morus notabilis]gb|EXB34477.1| Acetyl-CoA acetyltransferase, cytosolic 1 [Morus notabilis]	399	687	1773	0	342	396	0.86	356	396	0.89
comp94943_c0_seq1_28	399	ref|XP_010100371.1| GDSL esterase/lipase [Morus notabilis]gb|EXB82505.1| GDSL esterase/lipase [Morus notabilis]	386	570	1468	0	278	385	0.72	309	385	0.8	13	385	0.03
comp75231_c0_seq3_25	359	ref|XP_008218450.1| PREDICTED: isopentenyl-diphosphate Delta-isomerase I [Prunus mume]	299	448	1152	1e-156	220	266	0.82	231	266	0.86	3	266	0.01
comp84948_c1_seq3_13	791	ref|XP_010107187.1| Nudix hydrolase 3 [Morus notabilis]gb|EXC14083.1| Nudix hydrolase 3 [Morus notabilis]	800	1354	3504	0	650	802	0.81	718	802	0.89	31	802	0.03
comp64043_c0_seq1_10	494	ref|XP_006467495.1| PREDICTED: 3-oxoacyl-[acyl-carrier-protein] synthase I,chloroplastic-like [Citrus sinensis]gb|KDO78133.1| hypothetical protein CISIN_1g012221mg [Citrus sinensis]	468	825	2132	0	405	469	0.86	426	469	0.9	2	469	0
comp47102_c0_seq1_17	327	ref|XP_009358071.1| PREDICTED: probable carboxylesterase 12 [Pyrus x bretschneideri]	303	424	1091	1e-147	192	304	0.63	245	304	0.8	2	304	0
comp63032_c0_seq1_18	861	ref|XP_010108055.1| Phospholipase D beta 1 [Morus notabilis]gb|EXC17787.1| Phospholipase D beta 1 [Morus notabilis]	853	1425	3690	0	665	838	0.79	747	838	0.89	5	838	0
comp75375_c0_seq1_53	815	ref|XP_010097235.1| Phospholipase D alpha 1 [Morus notabilis]gb|EXB67302.1| Phospholipase D alpha 1 [Morus notabilis]	808	1458	3775	0	687	810	0.84	753	810	0.92	3	810	0
comp67046_c0_seq1_68	550	ref|XP_008227831.1| PREDICTED: long chain acyl-CoA synthetase 1 isoform X1 [Prunusmume]	669	845	2183	0	391	514	0.76	457	514	0.88	1	514	0
comp83832_c0_seq3_8	299	ref|XP_010112593.1| Sex determination protein tasselseed-2 [Morus notabilis]gb|EXC34228.1| Sex determination protein tasselseed-2 [Morus notabilis]	261	341	875	1e-115	182	272	0.66	212	272	0.77	18	272	0.06
comp85136_c0_seq3_9	411	gb|AGW24283.1| chalcone synthase [Melastoma malabathricum]	391	733	1892	0	350	389	0.89	367	389	0.94
comp80343_c0_seq1_40	472	ref|XP_003555870.1| PREDICTED: diphosphomevalonate decarboxylase-like [Glycine max]	421	721	1862	0	340	423	0.8	377	423	0.89	2	423	0
comp68786_c0_seq1_6	260	ref|XP_008218908.1| PREDICTED: uncharacterized protein LOC103319171 [Prunus mume]	234	329	843	1e-112	162	201	0.8	176	201	0.87	8	201	0.03
comp82626_c0_seq11_4	276	ref|XP_010104812.1| Momilactone A synthase [Morus notabilis]gb|EXC01953.1| Momilactone A synthase [Morus notabilis]	275	437	1124	1e-153	211	275	0.76	236	275	0.85
comp91197_c0_seq1_28	552	ref|XP_010106943.1| Biotin carboxylase 1 [Morus notabilis]gb|EXC12825.1| Biotin carboxylase 1 [Morus notabilis]	534	1014	2621	0	485	534	0.9	506	534	0.94	1	534	0
comp77047_c0_seq1_39	488	ref|XP_010108051.1| Hydroxymethylglutaryl-CoA synthase [Morus notabilis]gb|EXC17783.1| Hydroxymethylglutaryl-CoA synthase [Morus notabilis]	467	860	2221	0	410	467	0.87	434	467	0.92	7	467	0.01
comp69273_c0_seq1_5	303	ref|XP_010276407.1| PREDICTED: short-chain type dehydrogenase/reductase-like [Nelumbonucifera]	268	402	1033	1e-139	199	271	0.73	227	271	0.83	5	271	0.01
comp73939_c0_seq2_5	145	ref|XP_009347736.1| PREDICTED: beta-Amyrin Synthase 1-like [Pyrus x bretschneideri]	216	231	590	2e-75	108	139	0.77	116	139	0.83
comp80254_c0_seq2_9	497	gb|ADD31604.1| acetyl-CoA carboxylase carboxyltransferase beta subunit protein(chloroplast) [Ficus sp. Moore 315]	497	870	2248	0	421	493	0.85	451	493	0.91	2	493	0
comp17236_c0_seq1_5	168	ref|XP_002956223.1| hypothetical protein VOLCADRAFT_83516 [Volvox carteri f.nagariensis]gb|EFJ42762.1| hypothetical protein VOLCADRAFT_83516 [Volvox carteri f.nagariensis]	376	293	751	2e-97	138	168	0.82	157	168	0.93
comp84796_c0_seq15_17	260	ref|XP_003606450.1| Isovaleryl-CoA dehydrogenase [Medicago truncatula]gb|AES88647.1| acyl-CoA dehydrogenase [Medicago truncatula]gb|AFK41805.1| unknown [Medicago truncatula]	417	504	1299	1e-178	237	253	0.93	249	253	0.98
comp84028_c1_seq1_11	741	ref|XP_010105147.1| Glyoxysomal fatty acid beta-oxidation multifunctional protein MFP-a[Morus notabilis]gb|EXC03955.1| Glyoxysomal fatty acid beta-oxidation multifunctional protein MFP-a[Morus notabilis]	726	1332	3447	0	634	726	0.87	684	726	0.94
comp79005_c0_seq2_27	516	ref|XP_010112184.1| hypothetical protein L484_009550 [Morus notabilis]gb|EXC32850.1| hypothetical protein L484_009550 [Morus notabilis]	489	659	1699	0	321	494	0.64	381	494	0.77	18	494	0.03
comp83973_c1_seq1_25	365	ref|XP_009348744.1| PREDICTED: GDSL esterase/lipase At5g03610-like [Pyrus xbretschneideri]	357	480	1235	1e-168	234	321	0.72	274	321	0.85	4	321	0.01
comp69315_c0_seq1_5	149	ref|XP_002266030.2| PREDICTED: 60S acidic ribosomal protein P2 isoform X1 [Vitisvinifera]emb|CBI17057.3| unnamed protein product [Vitis vinifera]	145	111	278	5e-29	56	67	0.83	61	67	0.91
comp73838_c0_seq1_7	314	ref|XP_002524859.1| ribosomal protein L5, putative [Ricinus communis]gb|EEF37483.1| ribosomal protein L5, putative [Ricinus communis]	299	457	1175	1e-160	224	289	0.77	239	289	0.82
comp54158_c0_seq1_19	280	ref|XP_004141698.1| PREDICTED: 40S ribosomal protein S3-3-like [Cucumis sativus]ref|XP_004167885.1| PREDICTED: 40S ribosomal protein S3-3-like [Cucumis sativus]	236	461	1187	1e-164	225	236	0.95	229	236	0.97
comp57363_c0_seq1_26	186	ref|XP_008644390.1| PREDICTED: 40S ribosomal protein S23-like [Zea mays]	192	288	736	2e-97	140	151	0.92	145	151	0.96
comp921376_c0_seq1_9	152	ref|WP_018228080.1| elongation factor Tu [Methyloversatilis universalis]	396	304	779	1e-101	150	152	0.98	150	152	0.98
comp82049_c0_seq4_37	466	gb|ABA12218.1| translation elongation factor 1A-2 [Gossypium hirsutum]gb|KHG05237.1| Elongation factor 1-alpha [Gossypium arboreum]	447	909	2348	0	438	447	0.97	443	447	0.99
comp59492_c0_seq1_5	183	ref|XP_001785869.1| predicted protein [Physcomitrella patens]gb|EDQ49322.1| predicted protein [Physcomitrella patens]	186	259	662	3e-86	131	176	0.74	147	176	0.83	1	176	0
comp80004_c0_seq1_14	226	ref|XP_007201344.1| hypothetical protein PRUPE_ppa012001mg [Prunus persica]ref|XP_008235116.1| PREDICTED: 60S ribosomal protein L18-2 [Prunus mume]gb|EMJ02543.1| hypothetical protein PRUPE_ppa012001mg [Prunus persica]	187	367	943	1e-128	181	187	0.96	186	187	0.99
comp74440_c0_seq2_19	208	ref|XP_010503548.1| PREDICTED: 60S ribosomal protein L13-1 [Camelina sativa]ref|XP_010515238.1| PREDICTED: 60S ribosomal protein L13-1 [Camelina sativa]	206	369	946	1e-128	175	194	0.9	187	194	0.96
comp74779_c0_seq1_8	320	ref|XP_008454823.1| PREDICTED: 40S ribosomal protein S4-3 [Cucumis melo]ref|XP_008454824.1| PREDICTED: 40S ribosomal protein S4-3 [Cucumis melo]	264	512	1319	0	244	256	0.95	254	256	0.99
comp193829_c0_seq1_7	68	gb|AAR09998.1| similar to Drosophila melanogaster CG2998, partial [Drosophilayakuba]gb|AAR10159.1| similar to Drosophila melanogaster CG2998, partial [Drosophilayakuba]	58	99	245	2e-26	48	51	0.94	50	51	0.98
comp77578_c0_seq1_48	849	ref|XP_006422199.1| hypothetical protein CICLE_v10004309mg [Citrus clementina]ref|XP_006490495.1| PREDICTED: elongation factor 2-like [Citrus sinensis]gb|ESR35439.1| hypothetical protein CICLE_v10004309mg [Citrus clementina]gb|KDO46718.1| hypothetical protein CISIN_1g003165mg [Citrus sinensis]gb|KDO46719.1| hypothetical protein CISIN_1g003165mg [Citrus sinensis]	843	1722	4460	0	818	843	0.97	835	843	0.99
comp73677_c0_seq1_6	152	gb|AAP80667.1|AF479048_1 ribosomal Pr 117, partial [Triticum aestivum]	147	282	722	2e-96	143	151	0.94	144	151	0.95	6	151	0.03
comp85817_c0_seq1_14	142	ref|XP_004296381.1| PREDICTED: 60S ribosomal protein L14-2-like [Fragaria vesca subsp.vesca]	133	228	582	1e-75	116	133	0.87	119	133	0.89
comp56065_c0_seq1_6	202	ref|XP_008437538.1| PREDICTED: 60S ribosomal protein L9 [Cucumis melo]gb|ADN33776.1| 60S ribosomal protein l9 [Cucumis melo subsp. melo]	194	369	948	1e-129	179	194	0.92	190	194	0.97
comp78880_c0_seq2_12	204	gb|AAF34799.1|AF227979_1 40S ribosomal protein S16 [Euphorbia esula]	144	280	716	1e-94	136	139	0.97	137	139	0.98
comp81258_c0_seq1_16	239	ref|XP_008387136.1| PREDICTED: 40S ribosomal protein S5-like [Malus domestica]	208	387	994	1e-135	187	206	0.9	194	206	0.94
comp81164_c0_seq1_30	585	ref|XP_010095486.1| Aspartate--tRNA ligase [Morus notabilis]gb|EXB60460.1| Aspartate--tRNA ligase [Morus notabilis]	541	921	2381	0	446	508	0.87	477	508	0.93	1	508	0
comp79696_c0_seq1_14	438	ref|XP_009415521.1| PREDICTED: eukaryotic initiation factor 4A-15 [Musa acuminatasubsp. malaccensis]	413	820	2117	0	392	413	0.94	406	413	0.98
comp44685_c0_seq1_3	100	gb|AAK27415.1| elongation factor 1 alpha short form [Monosiga brevicollis]	208	191	484	2e-60	90	93	0.96	92	93	0.98
comp44858_c0_seq1_3	99	gb|ACF86701.1| unknown [Zea mays]	106	179	454	4e-57	85	99	0.85	92	99	0.92
comp76534_c0_seq1_39	682	ref|XP_010101088.1| DEAD-box ATP-dependent RNA helicase 37 [Morus notabilis]gb|EXB86900.1| DEAD-box ATP-dependent RNA helicase 37 [Morus notabilis]	612	848	2192	0	411	436	0.94	423	436	0.97	1	436	0
comp61885_c0_seq1_3	117	ref|XP_008371599.1| PREDICTED: 40S ribosomal protein S14-3 isoform X1 [Malus domestica]ref|XP_008358615.1| PREDICTED: 40S ribosomal protein S14-3 [Malus domestica]ref|XP_009360878.1| PREDICTED: 40S ribosomal protein S14-3 isoform X1 [Pyrus xbretschneideri]	150	184	466	4e-58	91	106	0.85	94	106	0.88
comp81709_c8_seq2_23	869	ref|XP_010105960.1| Multiple C2 and transmembrane domain-containing protein 1 [Morusnotabilis]gb|EXC06842.1| Multiple C2 and transmembrane domain-containing protein 1 [Morusnotabilis]	1006	894	2310	0	435	551	0.78	479	551	0.86	4	551	0
comp67617_c0_seq2_5	191	ref|XP_002305397.1| 40S ribosomal protein S19 [Populus trichocarpa]gb|EEE85908.1| 40S ribosomal protein S19 [Populus trichocarpa]	143	287	735	6e-98	134	143	0.93	141	143	0.98
comp64165_c0_seq1_42	823	ref|XP_010106860.1| Glutamine--tRNA ligase [Morus notabilis]gb|EXC12320.1| Glutamine--tRNA ligase [Morus notabilis]	1108	1402	3629	0	668	789	0.84	711	789	0.9
comp61744_c0_seq1_2	201	ref|XP_002958222.1| component of cytosolic 80S ribosome and 40S small subunit [Volvoxcarteri f. nagariensis]gb|EFJ40676.1| component of cytosolic 80S ribosome and 40S small subunit [Volvoxcarteri f. nagariensis]	190	258	660	2e-85	124	182	0.68	153	182	0.84	1	182	0
comp74003_c0_seq2_32	400	gb|KDP22867.1| hypothetical protein JCGZ_00454 [Jatropha curcas]	396	665	1717	0	326	394	0.82	344	394	0.87	1	394	0
comp307494_c0_seq1_7	265	ref|XP_007016138.1| Ribosomal protein L10 family protein [Theobroma cacao]gb|EOY33757.1| Ribosomal protein L10 family protein [Theobroma cacao]	321	283	725	2e-92	146	219	0.66	161	219	0.73
comp87246_c0_seq1_15	745	ref|XP_004152844.1| PREDICTED: glycine--tRNA ligase 1, mitochondrial-like [Cucumissativus]gb|KGN61223.1| hypothetical protein Csa_2G070890 [Cucumis sativus]	729	1218	3152	0	574	689	0.83	633	689	0.91	3	689	0
comp30213_c0_seq1_6	123	ref|XP_008487718.1| PREDICTED: 40S ribosomal protein S25 isoform X1 [Diaphorina citri]ref|XP_008487720.1| PREDICTED: 40S ribosomal protein S25 isoform X2 [Diaphorina citri]gb|ABG81982.1| putative ribosomal protein S25 [Diaphorina citri]	120	153	386	4e-46	83	119	0.69	88	119	0.73	1	119	0
comp27660_c0_seq1_9	122	ref|XP_004133785.1| PREDICTED: 40S ribosomal protein S6-like [Cucumis sativus]ref|XP_004155185.1| PREDICTED: 40S ribosomal protein S6-like [Cucumis sativus]gb|KGN56379.1| hypothetical protein Csa_3G118140 [Cucumis sativus]	250	231	589	3e-75	119	122	0.97	121	122	0.99
comp61847_c1_seq1_4	164	gb|KHG03722.1| 40S ribosomal S15a-1 -like protein [Gossypium arboreum]	169	270	689	5e-91	136	157	0.86	141	157	0.89	6	157	0.03
comp88463_c0_seq1_15	307	ref|XP_008460096.1| PREDICTED: 50S ribosomal protein L3, chloroplastic [Cucumis melo]	293	391	1004	1e-134	191	211	0.9	204	211	0.96
comp27573_c0_seq1_19	198	ref|XP_010101033.1| Eukaryotic translation initiation factor 5A-4 [Morus notabilis]gb|EXB86681.1| Eukaryotic translation initiation factor 5A-4 [Morus notabilis]	160	317	813	1e-109	153	160	0.95	156	160	0.97
comp71894_c0_seq2_21	208	ref|NP_001236526.1| uncharacterized protein LOC100305777 [Glycine max]gb|ACU13637.1| unknown [Glycine max]	181	339	870	1e-117	160	166	0.96	163	166	0.98
comp35936_c0_seq1_9	148	gb|KDR23361.1| 40S ribosomal protein S13 [Zootermopsis nevadensis]	151	277	708	2e-94	136	148	0.91	142	148	0.95
comp80590_c0_seq1_33	501	ref|XP_010098856.1| DEAD-box ATP-dependent RNA helicase 38 [Morus notabilis]gb|EXB75944.1| DEAD-box ATP-dependent RNA helicase 38 [Morus notabilis]	489	822	2124	0	393	466	0.84	427	466	0.91	2	466	0
comp73675_c0_seq1_11	601	ref|XP_010099023.1| putative phenylalanine--tRNA ligase beta subunit [Morus notabilis]gb|EXB76381.1| putative phenylalanine--tRNA ligase beta subunit [Morus notabilis]	596	1073	2776	0	522	592	0.88	552	592	0.93	3	592	0
comp54338_c0_seq1_8	274	ref|XP_010105399.1| 60S ribosomal protein L7-4 [Morus notabilis]gb|EXC04599.1| 60S ribosomal protein L7-4 [Morus notabilis]	291	392	1007	1e-135	192	244	0.78	203	244	0.83
comp67458_c0_seq1_34	344	ref|XP_004138372.1| PREDICTED: 40S ribosomal protein SA-like [Cucumis sativus]gb|KGN45883.1| hypothetical protein Csa_6G016990 [Cucumis sativus]	308	449	1156	1e-157	225	276	0.81	236	276	0.85	8	276	0.02
comp83022_c0_seq2_19	305	ref|XP_010094236.1| 40S ribosomal protein S2-4 [Morus notabilis]gb|EXB55434.1| 40S ribosomal protein S2-4 [Morus notabilis]	274	460	1184	1e-162	224	233	0.96	229	233	0.98
comp68184_c0_seq2_7	159	ref|YP_635981.1| ribosomal protein L12 (chloroplast) [Acutodesmus obliquus]sp|Q1KVU3.1|RK12_ACUOB RecName: Full=50S ribosomal protein L12, chloroplastic(chloroplast) [Acutodesmus obliquus]gb|ABD48264.1| ribosomal protein L12 [Acutodesmus obliquus]	132	171	433	1e-52	103	132	0.78	107	132	0.81
comp80002_c0_seq1_11	176	ref|XP_002183768.1| predicted protein [Phaeodactylum tricornutum CCAP 1055/1]gb|EEC44950.1| predicted protein [Phaeodactylum tricornutum CCAP 1055/1]	171	188	478	1e-58	100	173	0.57	118	173	0.68	2	173	0.01
comp65878_c2_seq4_20	876	ref|XP_002950616.1| hypothetical protein VOLCADRAFT_120886 [Volvox carteri f.nagariensis]gb|EFJ48362.1| hypothetical protein VOLCADRAFT_120886 [Volvox carteri f.nagariensis]	1143	1070	2766	0	552	860	0.64	630	860	0.73	9	860	0.01
comp351645_c0_seq1_4	153	gb|ACO50119.1| elongation factor 1 alpha-like protein, partial [Diplonemapapillatum]	464	247	630	4e-78	115	153	0.75	132	153	0.86	1	153	0
comp41538_c0_seq1_30	437	ref|XP_004296555.1| PREDICTED: mannose-1-phosphate guanyltransferase alpha-like[Fragaria vesca subsp. vesca]	415	780	2014	0	374	416	0.89	395	416	0.94	1	416	0
comp68234_c0_seq1_7	292	ref|XP_010090259.1| 40S ribosomal protein S3a [Morus notabilis]gb|EXB39197.1| 40S ribosomal protein S3a [Morus notabilis]	262	457	1176	1e-161	219	235	0.93	223	235	0.94
comp83554_c0_seq1_15	167	ref|XP_002522429.1| 60S ribosomal protein L34, putative [Ricinus communis]gb|EEF39921.1| 60S ribosomal protein L34, putative [Ricinus communis]	120	196	497	3e-62	95	95	1	95	95	1
comp46367_c0_seq1_11	155	dbj|BAM17725.1| ribosomal protein S18 [Papilio xuthus]dbj|BAM19040.1| ribosomal protein S18 [Papilio polytes]	152	243	619	1e-80	112	131	0.85	126	131	0.96
comp71820_c0_seq1_6	210	ref|XP_007025337.1| Ribosomal protein large subunit 16A [Theobroma cacao]gb|EOY27959.1| Ribosomal protein large subunit 16A [Theobroma cacao]	257	330	847	1e-113	168	207	0.81	172	207	0.83	2	207	0
comp77285_c0_seq1_29	466	ref|XP_010107350.1| Serine--tRNA ligase [Morus notabilis]gb|EXC15377.1| Serine--tRNA ligase [Morus notabilis]	447	863	2230	0	405	447	0.9	432	447	0.96
comp82616_c0_seq2_10	171	ref|XP_001628997.1| predicted protein [Nematostella vectensis]gb|EDO36934.1| predicted protein [Nematostella vectensis]	153	221	562	9e-72	101	135	0.74	124	135	0.91	4	135	0.02
comp44754_c0_seq1_8	395	gb|EPX75111.1| translation initiation factor eIF2 gamma subunit[Schizosaccharomyces octosporus yFS286]	446	605	1561	0	280	395	0.7	340	395	0.86	2	395	0
comp44754_c0_seq1_8	395	gb|EPX75111.1| translation initiation factor eIF2 gamma subunit[Schizosaccharomyces octosporus yFS286]	446	605	1561	0	280	395	0.7	340	395	0.86	2	395	0
comp44754_c0_seq1_8	395	gb|EPX75111.1| translation initiation factor eIF2 gamma subunit[Schizosaccharomyces octosporus yFS286]	446	605	1561	0	280	395	0.7	340	395	0.86	2	395	0
comp756_c0_seq1_9	178	ref|XP_004534738.1| PREDICTED: 60S ribosomal protein L12-like [Ceratitis capitata]	165	323	827	1e-112	159	165	0.96	162	165	0.98
comp57165_c0_seq1_11	239	ref|XP_004154636.1| PREDICTED: 60S ribosomal protein L13a-4-like isoform 1 [Cucumissativus]	241	411	1056	1e-144	201	218	0.92	208	218	0.95	1	218	0
comp95557_c0_seq1_18	238	gb|KDP41204.1| hypothetical protein JCGZ_15611 [Jatropha curcas]	221	230	586	3e-73	112	204	0.54	147	204	0.72	7	204	0.03
comp44291_c0_seq1_3	96	ref|XP_002183867.1| predicted protein [Phaeodactylum tricornutum CCAP 1055/1]gb|EEC44536.1| predicted protein [Phaeodactylum tricornutum CCAP 1055/1]	426	163	412	5e-47	74	75	0.98	75	75	1
comp36188_c0_seq1_14	210	gb|ABR27879.1| 40S ribosomal protein S8 [Triatoma infestans]	208	302	773	1e-102	147	206	0.71	162	206	0.78
comp84283_c1_seq1_13	657	ref|XP_008242476.1| PREDICTED: arginine--tRNA ligase, cytoplasmic-like isoform X1[Prunus mume]	649	1077	2786	0	516	618	0.83	557	618	0.9	7	618	0.01
comp67566_c0_seq1_7	276	ref|XP_009352593.1| PREDICTED: 60S ribosomal protein L6-like isoform X1 [Pyrus xbretschneideri]	233	330	845	1e-112	169	233	0.72	178	233	0.76
comp75531_c0_seq1_9	429	ref|XP_006433295.1| hypothetical protein CICLE_v10001213mg [Citrus clementina]ref|XP_006471976.1| PREDICTED: amidase 1-like isoform X2 [Citrus sinensis]gb|ESR46535.1| hypothetical protein CICLE_v10001213mg [Citrus clementina]	431	634	1634	0	299	424	0.7	351	424	0.82	1	424	0
comp79696_c0_seq1_14	438	ref|XP_009415521.1| PREDICTED: eukaryotic initiation factor 4A-15 [Musa acuminatasubsp. malaccensis]	413	820	2117	0	392	413	0.94	406	413	0.98
comp44858_c0_seq1_3	99	gb|ACF86701.1| unknown [Zea mays]	106	179	454	4e-57	85	99	0.85	92	99	0.92
comp76534_c0_seq1_39	682	ref|XP_010101088.1| DEAD-box ATP-dependent RNA helicase 37 [Morus notabilis]gb|EXB86900.1| DEAD-box ATP-dependent RNA helicase 37 [Morus notabilis]	612	848	2192	0	411	436	0.94	423	436	0.97	1	436	0
comp77452_c0_seq3_68	901	ref|XP_004294067.1| PREDICTED: probable LRR receptor-like serine/threonine-proteinkinase At1g53430-like [Fragaria vesca subsp. vesca]	1016	1122	2902	0	572	892	0.64	684	892	0.76	13	892	0.01
comp87390_c0_seq1_16	639	ref|XP_010095584.1| Probably inactive leucine-rich repeat receptor-like protein kinase[Morus notabilis]gb|EXB61157.1| Probably inactive leucine-rich repeat receptor-like protein kinase[Morus notabilis]	602	968	2503	0	467	622	0.75	525	622	0.84	24	622	0.03
comp85163_c0_seq3_69	615	ref|XP_010093040.1| putative LRR receptor-like serine/threonine-protein kinase [Morusnotabilis]gb|EXB53368.1| putative LRR receptor-like serine/threonine-protein kinase [Morusnotabilis]	1105	952	2460	0	466	646	0.72	528	646	0.81	36	646	0.05
comp80590_c0_seq1_33	501	ref|XP_010098856.1| DEAD-box ATP-dependent RNA helicase 38 [Morus notabilis]gb|EXB75944.1| DEAD-box ATP-dependent RNA helicase 38 [Morus notabilis]	489	822	2124	0	393	466	0.84	427	466	0.91	2	466	0
comp81516_c0_seq1_88	996	ref|XP_010113026.1| putative leucine-rich repeat receptor-like protein kinase [Morusnotabilis]gb|EXC35197.1| putative leucine-rich repeat receptor-like protein kinase [Morusnotabilis]	964	1493	3864	0	732	968	0.75	831	968	0.85	8	968	0
comp78347_c0_seq1_25	1148	ref|XP_010089636.1| LRR receptor-like serine/threonine-protein kinase RPK2 [Morusnotabilis]gb|EXB38107.1| LRR receptor-like serine/threonine-protein kinase RPK2 [Morusnotabilis]	1155	1710	4428	0	847	1109	0.76	931	1109	0.83	6	1109	0
comp30171_c0_seq1_75	633	ref|XP_001755358.1| predicted protein [Physcomitrella patens]gb|EDQ79838.1| predicted protein [Physcomitrella patens]	582	512	1318	1e-173	274	572	0.47	354	572	0.61	31	572	0.05
comp83339_c0_seq1_71	1288	ref|XP_010089232.1| Serine/threonine-protein kinase [Morus notabilis]gb|EXB37530.1| Serine/threonine-protein kinase [Morus notabilis]	1232	1614	4179	0	848	1291	0.65	951	1291	0.73	75	1291	0.05
comp83613_c0_seq1_55	1033	ref|XP_003632548.1| PREDICTED: probable LRR receptor-like serine/threonine-protein kinaseAt1g06840 isoform X1 [Vitis vinifera]	949	1005	2598	0	542	983	0.55	663	983	0.67	35	983	0.03
comp347627_c0_seq1_16	265	ref|XP_010314133.1| PREDICTED: cyclin-dependent kinase E-1 isoform X2 [Solanumlycopersicum]	456	323	828	1e-106	152	233	0.65	180	233	0.77
comp73830_c0_seq1_37	887	ref|XP_010105101.1| Leucine-rich repeat receptor-like serine/threonine-protein kinaseBAM1 [Morus notabilis]gb|EXC03886.1| Leucine-rich repeat receptor-like serine/threonine-protein kinaseBAM1 [Morus notabilis]	1021	1281	3314	0	657	859	0.76	702	859	0.81	38	859	0.04
comp81318_c0_seq2_10	566	ref|XP_010091811.1| Cysteine-rich receptor-like protein kinase 3 [Morus notabilis]gb|EXB46019.1| Cysteine-rich receptor-like protein kinase 3 [Morus notabilis]	641	870	2248	0	420	537	0.78	464	537	0.86	2	537	0
comp83698_c0_seq1_24	1004	ref|XP_010099530.1| nuclease domain-containing protein 1 [Morus notabilis]gb|EXB79410.1| nuclease domain-containing protein 1 [Morus notabilis]	986	1588	4111	0	792	997	0.79	860	997	0.86	17	997	0.01
comp79696_c0_seq1_14	438	ref|XP_009415521.1| PREDICTED: eukaryotic initiation factor 4A-15 [Musa acuminatasubsp. malaccensis]	413	820	2117	0	392	413	0.94	406	413	0.98
comp44858_c0_seq1_3	99	gb|ACF86701.1| unknown [Zea mays]	106	179	454	4e-57	85	99	0.85	92	99	0.92
comp76534_c0_seq1_39	682	ref|XP_010101088.1| DEAD-box ATP-dependent RNA helicase 37 [Morus notabilis]gb|EXB86900.1| DEAD-box ATP-dependent RNA helicase 37 [Morus notabilis]	612	848	2192	0	411	436	0.94	423	436	0.97	1	436	0
comp84948_c1_seq3_13	791	ref|XP_010107187.1| Nudix hydrolase 3 [Morus notabilis]gb|EXC14083.1| Nudix hydrolase 3 [Morus notabilis]	800	1354	3504	0	650	802	0.81	718	802	0.89	31	802	0.03
comp77452_c0_seq3_68	901	ref|XP_004294067.1| PREDICTED: probable LRR receptor-like serine/threonine-proteinkinase At1g53430-like [Fragaria vesca subsp. vesca]	1016	1122	2902	0	572	892	0.64	684	892	0.76	13	892	0.01
comp87390_c0_seq1_16	639	ref|XP_010095584.1| Probably inactive leucine-rich repeat receptor-like protein kinase[Morus notabilis]gb|EXB61157.1| Probably inactive leucine-rich repeat receptor-like protein kinase[Morus notabilis]	602	968	2503	0	467	622	0.75	525	622	0.84	24	622	0.03
comp85163_c0_seq3_69	615	ref|XP_010093040.1| putative LRR receptor-like serine/threonine-protein kinase [Morusnotabilis]gb|EXB53368.1| putative LRR receptor-like serine/threonine-protein kinase [Morusnotabilis]	1105	952	2460	0	466	646	0.72	528	646	0.81	36	646	0.05
comp80590_c0_seq1_33	501	ref|XP_010098856.1| DEAD-box ATP-dependent RNA helicase 38 [Morus notabilis]gb|EXB75944.1| DEAD-box ATP-dependent RNA helicase 38 [Morus notabilis]	489	822	2124	0	393	466	0.84	427	466	0.91	2	466	0
comp81516_c0_seq1_88	996	ref|XP_010113026.1| putative leucine-rich repeat receptor-like protein kinase [Morusnotabilis]gb|EXC35197.1| putative leucine-rich repeat receptor-like protein kinase [Morusnotabilis]	964	1493	3864	0	732	968	0.75	831	968	0.85	8	968	0
comp78347_c0_seq1_25	1148	ref|XP_010089636.1| LRR receptor-like serine/threonine-protein kinase RPK2 [Morusnotabilis]gb|EXB38107.1| LRR receptor-like serine/threonine-protein kinase RPK2 [Morusnotabilis]	1155	1710	4428	0	847	1109	0.76	931	1109	0.83	6	1109	0
comp30171_c0_seq1_75	633	ref|XP_001755358.1| predicted protein [Physcomitrella patens]gb|EDQ79838.1| predicted protein [Physcomitrella patens]	582	512	1318	1e-173	274	572	0.47	354	572	0.61	31	572	0.05
comp83339_c0_seq1_71	1288	ref|XP_010089232.1| Serine/threonine-protein kinase [Morus notabilis]gb|EXB37530.1| Serine/threonine-protein kinase [Morus notabilis]	1232	1614	4179	0	848	1291	0.65	951	1291	0.73	75	1291	0.05
comp83613_c0_seq1_55	1033	ref|XP_003632548.1| PREDICTED: probable LRR receptor-like serine/threonine-protein kinaseAt1g06840 isoform X1 [Vitis vinifera]	949	1005	2598	0	542	983	0.55	663	983	0.67	35	983	0.03
comp347627_c0_seq1_16	265	ref|XP_010314133.1| PREDICTED: cyclin-dependent kinase E-1 isoform X2 [Solanumlycopersicum]	456	323	828	1e-106	152	233	0.65	180	233	0.77
comp73830_c0_seq1_37	887	ref|XP_010105101.1| Leucine-rich repeat receptor-like serine/threonine-protein kinaseBAM1 [Morus notabilis]gb|EXC03886.1| Leucine-rich repeat receptor-like serine/threonine-protein kinaseBAM1 [Morus notabilis]	1021	1281	3314	0	657	859	0.76	702	859	0.81	38	859	0.04
comp81318_c0_seq2_10	566	ref|XP_010091811.1| Cysteine-rich receptor-like protein kinase 3 [Morus notabilis]gb|EXB46019.1| Cysteine-rich receptor-like protein kinase 3 [Morus notabilis]	641	870	2248	0	420	537	0.78	464	537	0.86	2	537	0
comp83282_c0_seq1_48	808	ref|XP_010107074.1| Sucrose synthase [Morus notabilis]gb|EXC13595.1| Sucrose synthase [Morus notabilis]	806	1588	4112	0	762	806	0.94	782	806	0.97
comp84004_c1_seq1_11	575	ref|XP_010097705.1| Phospholipase C 3 [Morus notabilis]gb|EXB70660.1| Phospholipase C 3 [Morus notabilis]	527	901	2328	0	423	528	0.8	473	528	0.89	4	528	0
comp66481_c0_seq1_10	409	ref|XP_007030576.1| GDP-mannose 3,5-epimerase 1 [Theobroma cacao]gb|EOY11078.1| GDP-mannose 3,5-epimerase 1 [Theobroma cacao]	426	753	1944	0	357	384	0.92	364	384	0.94
comp86214_c1_seq1_27	323	ref|XP_004142064.1| PREDICTED: uncharacterized protein At2g37660, chloroplastic-like[Cucumis sativus]gb|KGN54259.1| hypothetical protein Csa_4G296130 [Cucumis sativus]	326	491	1263	1e-173	251	335	0.74	276	335	0.82	23	335	0.06
comp84555_c0_seq2_43	818	ref|XP_010097822.1| Endo-1,3(4)-beta-glucanase 1 [Morus notabilis]gb|EXB72245.1| Endo-1,3(4)-beta-glucanase 1 [Morus notabilis]	743	988	2555	0	495	756	0.65	571	756	0.75	16	756	0.02
comp79756_c0_seq1_20	348	ref|XP_008223104.1| PREDICTED: uncharacterized protein LOC103322925 isoform X2 [Prunusmume]	338	485	1249	1e-170	237	340	0.69	270	340	0.79	12	340	0.03
comp79756_c0_seq1_20	348	ref|XP_008223104.1| PREDICTED: uncharacterized protein LOC103322925 isoform X2 [Prunusmume]	338	485	1249	1e-170	237	340	0.69	270	340	0.79	12	340	0.03
comp67056_c0_seq2_16	325	ref|XP_010091430.1| putative polygalacturonase [Morus notabilis]gb|EXB44467.1| putative polygalacturonase [Morus notabilis]	468	466	1198	1e-161	230	320	0.71	259	320	0.8	3	320	0
comp84461_c0_seq2_14	358	ref|XP_010089056.1| putative polygalacturonase [Morus notabilis]gb|EXB37303.1| putative polygalacturonase [Morus notabilis]	466	689	1778	0	325	358	0.9	345	358	0.96
comp74948_c0_seq1_11	396	ref|XP_010092951.1| hypothetical protein L484_018888 [Morus notabilis]gb|EXB53004.1| hypothetical protein L484_018888 [Morus notabilis]	380	692	1787	0	338	381	0.88	355	381	0.93	1	381	0
comp74948_c0_seq1_11	396	ref|XP_010092951.1| hypothetical protein L484_018888 [Morus notabilis]gb|EXB53004.1| hypothetical protein L484_018888 [Morus notabilis]	380	692	1787	0	338	381	0.88	355	381	0.93	1	381	0
comp74948_c0_seq1_11	396	ref|XP_010092951.1| hypothetical protein L484_018888 [Morus notabilis]gb|EXB53004.1| hypothetical protein L484_018888 [Morus notabilis]	380	692	1787	0	338	381	0.88	355	381	0.93	1	381	0
comp76498_c0_seq1_30	529	gb|KHG12061.1| Exo-poly-alpha-D-galacturonosidase [Gossypium arboreum]	474	666	1719	0	323	458	0.7	371	458	0.81	9	458	0.01
comp84109_c0_seq3_22	312	ref|XP_008388033.1| PREDICTED: isoflavone reductase-like protein [Malus domestica]	308	442	1138	1e-154	214	308	0.69	251	308	0.81
comp40099_c0_seq1_65	1091	ref|XP_007204296.1| hypothetical protein PRUPE_ppa000639mg [Prunus persica]gb|AFI57907.1| sucrose phosphate synthase 1f [Prunus persica]gb|EMJ05495.1| hypothetical protein PRUPE_ppa000639mg [Prunus persica]	1057	1859	4816	0	886	1057	0.83	958	1057	0.9	5	1057	0
comp41538_c0_seq1_30	437	ref|XP_004296555.1| PREDICTED: mannose-1-phosphate guanyltransferase alpha-like[Fragaria vesca subsp. vesca]	415	780	2014	0	374	416	0.89	395	416	0.94	1	416	0
comp793931_c0_seq1_5	193	ref|WP_024712426.1| membrane protein [Xanthomonas oryzae]	169	72	175	8e-13	57	183	0.31	87	183	0.47	24	183	0.13
comp82121_c0_seq1_25	330	ref|XP_006472740.1| PREDICTED: uncharacterized protein LOC102619287 [Citrus sinensis]	374	267	682	3e-84	132	200	0.66	155	200	0.77	1	200	0
comp82121_c0_seq1_25	330	ref|XP_006472740.1| PREDICTED: uncharacterized protein LOC102619287 [Citrus sinensis]	374	267	682	3e-84	132	200	0.66	155	200	0.77	1	200	0
comp85205_c1_seq2_38	710	gb|KDP44981.1| hypothetical protein JCGZ_01481 [Jatropha curcas]	648	1217	3150	0	589	618	0.95	600	618	0.97
comp78163_c0_seq2_15	603	ref|XP_010094358.1| RuBisCO large subunit-binding protein subunit beta [Morusnotabilis]gb|EXB55869.1| RuBisCO large subunit-binding protein subunit beta [Morusnotabilis]	769	1069	2765	0	542	599	0.9	556	599	0.92
comp80231_c0_seq1_36	729	ref|XP_010095881.1| Stromal 70 kDa heat shock-related protein [Morus notabilis]gb|EXB62431.1| Stromal 70 kDa heat shock-related protein [Morus notabilis]	707	1141	2952	0	597	710	0.84	607	710	0.85	23	710	0.03
comp85850_c0_seq1_10	205	gb|ACF48822.1| cyclophilin [Gossypium hirsutum]	173	312	799	1e-107	150	172	0.87	156	172	0.9
comp75492_c0_seq1_19	233	gb|AFK35043.1| unknown [Lotus japonicus]	216	329	843	1e-112	155	210	0.73	180	210	0.85
comp62796_c0_seq1_41	731	ref|XP_003543129.1| PREDICTED: heat shock 70 kDa protein, mitochondrial-like [Glycinemax]	674	1239	3206	0	604	658	0.91	630	658	0.95	1	658	0
comp73284_c0_seq1_39	692	ref|XP_008437399.1| PREDICTED: luminal-binding protein 5 [Cucumis melo]	665	1268	3282	0	628	666	0.94	636	666	0.95	1	666	0
comp74944_c0_seq3_26	906	ref|XP_008221168.1| PREDICTED: large proline-rich protein BAG6 isoform X1 [Prunus mume]ref|XP_008221169.1| PREDICTED: large proline-rich protein BAG6 isoform X1 [Prunus mume]	945	845	2184	0	507	949	0.53	605	949	0.63	87	949	0.09
comp84128_c0_seq1_69	1025	ref|XP_002300175.1| 26S proteasome regulatory subunit family protein [Populustrichocarpa]gb|EEE84980.1| 26S proteasome regulatory subunit family protein [Populustrichocarpa]	1004	1581	4094	0	792	992	0.79	824	992	0.83	6	992	0
comp84128_c0_seq1_69	1025	ref|XP_002300175.1| 26S proteasome regulatory subunit family protein [Populustrichocarpa]gb|EEE84980.1| 26S proteasome regulatory subunit family protein [Populustrichocarpa]	1004	1581	4094	0	792	992	0.79	824	992	0.83	6	992	0
comp65814_c0_seq1_5	288	ref|XP_010112139.1| Proteasome subunit beta type-6 [Morus notabilis]gb|EXC32764.1| Proteasome subunit beta type-6 [Morus notabilis]	245	453	1165	1e-160	221	244	0.9	226	244	0.92	7	244	0.02
comp69405_c0_seq1_30	595	ref|XP_010109474.1| RuBisCO large subunit-binding protein subunit alpha [Morusnotabilis]gb|EXC22885.1| RuBisCO large subunit-binding protein subunit alpha [Morusnotabilis]	585	1004	2596	0	511	574	0.89	525	574	0.91
comp62405_c0_seq1_8	302	ref|XP_010089662.1| 20 kDa chaperonin [Morus notabilis]gb|EXB38181.1| 20 kDa chaperonin [Morus notabilis]	255	399	1026	1e-138	208	255	0.81	222	255	0.87	2	255	0
comp85199_c0_seq1_53	780	ref|XP_007210025.1| hypothetical protein PRUPE_ppa018629mg [Prunus persica]gb|EMJ11224.1| hypothetical protein PRUPE_ppa018629mg [Prunus persica]	773	1031	2666	0	505	774	0.65	596	774	0.77	17	774	0.02
comp68905_c0_seq1_28	477	ref|XP_010654248.1| PREDICTED: ribulose bisphosphate carboxylase/oxygenase activase,chloroplastic isoform X2 [Vitis vinifera]	437	759	1959	0	365	438	0.83	391	438	0.89	4	438	0
comp85822_c1_seq1_16	484	ref|XP_008371779.1| PREDICTED: endoplasmic reticulum oxidoreductin-1-like [Malusdomestica]	476	764	1973	0	362	478	0.75	405	478	0.84	2	478	0
comp76549_c0_seq1_40	720	ref|XP_003635036.1| PREDICTED: heat shock cognate protein 80 [Vitis vinifera]	699	1217	3149	0	602	699	0.86	621	699	0.88
comp85889_c0_seq1_44	595	ref|XP_010100450.1| putative nucleoredoxin 1 [Morus notabilis]gb|EXB82584.1| putative nucleoredoxin 1 [Morus notabilis]	568	845	2184	0	418	571	0.73	465	571	0.81	3	571	0
comp74090_c1_seq2_21	784	ref|XP_010093626.1| Subtilisin-like protease [Morus notabilis]gb|EXB54387.1| Subtilisin-like protease [Morus notabilis]	724	962	2488	0	472	734	0.64	583	734	0.79	12	734	0.01
comp57307_c0_seq1_5	148	ref|XP_010105685.1| Peptide methionine sulfoxide reductase [Morus notabilis]gb|EXC05716.1| Peptide methionine sulfoxide reductase [Morus notabilis]	138	249	635	2e-83	115	132	0.87	122	132	0.92
comp68153_c0_seq1_6	289	ref|XP_002264979.1| PREDICTED: nifU-like protein 4, mitochondrial [Vitis vinifera]	271	397	1019	1e-137	199	283	0.7	220	283	0.77	13	283	0.04
comp2659_c0_seq1_10	378	gb|AAD09565.1| heat shock protein 70 [Pneumocystis carinii]	647	556	1434	0	263	382	0.68	314	382	0.82	4	382	0.01
comp6_c0_seq1_10	152	gb|EFA83410.1| Hsc70 protein [Polysphondylium pallidum PN500]	653	279	714	9e-89	126	151	0.83	141	151	0.93
comp74570_c0_seq1_9	430	ref|XP_002264400.1| PREDICTED: elongation factor 1-gamma-like [Vitis vinifera]ref|XP_010657965.1| PREDICTED: elongation factor 1-gamma-like [Vitis vinifera]	423	685	1768	0	334	423	0.78	355	423	0.83	3	423	0
comp66210_c1_seq1_41	590	ref|XP_002263566.2| PREDICTED: peptidyl-prolyl cis-trans isomerase FKBP62 isoform X1[Vitis vinifera]emb|CBI29552.3| unnamed protein product [Vitis vinifera]	571	882	2278	0	435	574	0.75	481	574	0.83	3	574	0
comp69824_c0_seq1_13	256	ref|XP_010091321.1| Subtilisin-like protease [Morus notabilis]gb|EXB44295.1| Subtilisin-like protease [Morus notabilis]	919	418	1074	1e-138	197	252	0.78	228	252	0.9	1	252	0
comp86908_c0_seq1_12	577	ref|XP_010243653.1| PREDICTED: chaperonin CPN60-2, mitochondrial-like [Nelumbonucifera]	574	1085	2807	0	532	574	0.92	558	574	0.97
comp65285_c0_seq1_19	250	ref|XP_010064020.1| PREDICTED: proteasome subunit alpha type-6 [Eucalyptus grandis]gb|KCW71315.1| hypothetical protein EUGRSUZ_F04398 [Eucalyptus grandis]	246	478	1229	1e-170	227	238	0.95	234	238	0.98
comp68626_c0_seq1_20	844	ref|XP_002519502.1| Transitional endoplasmic reticulum ATPase, putative [Ricinuscommunis]gb|EEF42916.1| Transitional endoplasmic reticulum ATPase, putative [Ricinuscommunis]	805	1527	3953	0	747	805	0.92	765	805	0.95
comp79303_c0_seq1_5	196	ref|XP_010111095.1| Thioredoxin F-type [Morus notabilis]gb|EXC29957.1| Thioredoxin F-type [Morus notabilis]	184	250	638	2e-82	133	185	0.71	139	185	0.75	9	185	0.04
comp68857_c0_seq1_9	380	ref|XP_009593712.1| PREDICTED: probable protein disulfide-isomerase A6 [Nicotianatomentosiformis]	359	586	1510	0	282	359	0.78	304	359	0.84
comp68857_c0_seq1_9	380	ref|XP_009593712.1| PREDICTED: probable protein disulfide-isomerase A6 [Nicotianatomentosiformis]	359	586	1510	0	282	359	0.78	304	359	0.84
comp85251_c0_seq7_82	1222	ref|XP_010108347.1| Tripeptidyl-peptidase 2 [Morus notabilis]gb|EXC19138.1| Tripeptidyl-peptidase 2 [Morus notabilis]	1389	1988	5150	0	939	1066	0.88	1013	1066	0.95
comp86339_c0_seq1_28	360	ref|XP_010095297.1| putative protein disulfide-isomerase A6 [Morus notabilis]gb|EXB59326.1| putative protein disulfide-isomerase A6 [Morus notabilis]	360	601	1549	0	290	335	0.86	318	335	0.94
comp57641_c0_seq1_16	800	ref|XP_010111996.1| Subtilisin-like protease [Morus notabilis]gb|EXC32307.1| Subtilisin-like protease [Morus notabilis]	826	1140	2950	0	563	775	0.72	633	775	0.81	11	775	0.01
comp79183_c0_seq1_62	854	gb|KDP37205.1| hypothetical protein JCGZ_06261 [Jatropha curcas]	847	1411	3653	0	685	850	0.8	745	850	0.87	12	850	0.01
comp94547_c0_seq1_18	925	ref|XP_002952540.1| hypothetical protein VOLCADRAFT_75431 [Volvox carteri f.nagariensis]gb|EFJ46387.1| hypothetical protein VOLCADRAFT_75431 [Volvox carteri f.nagariensis]	915	1512	3914	0	770	922	0.83	800	922	0.86	13	922	0.01
comp73309_c0_seq1_11	395	ref|XP_008230399.1| PREDICTED: ubiquitin receptor RAD23d [Prunus mume]	385	516	1328	0	267	387	0.68	284	387	0.73	8	387	0.02
comp86860_c0_seq1_36	600	ref|XP_010100326.1| T-complex protein 1 subunit epsilon [Morus notabilis]gb|EXB82460.1| T-complex protein 1 subunit epsilon [Morus notabilis]	550	1049	2713	0	507	550	0.92	525	550	0.95	15	550	0.02
comp79615_c0_seq1_26	488	ref|XP_002520408.1| chaperonin containing t-complex protein 1, delta subunit, tcpd,putative [Ricinus communis]gb|EEF41963.1| chaperonin containing t-complex protein 1, delta subunit, tcpd,putative [Ricinus communis]	533	945	2443	0	464	488	0.95	480	488	0.98
comp83043_c1_seq1_33	532	ref|XP_010107858.1| Cysteine proteinase RD21a [Morus notabilis]gb|EXC17258.1| Cysteine proteinase RD21a [Morus notabilis]	476	726	1873	0	352	438	0.8	376	438	0.85	2	438	0
comp75610_c0_seq1_17	184	ref|XP_010102251.1| Peptidyl-prolyl cis-trans isomerase CYP19-3 [Morus notabilis]gb|EXB93194.1| Peptidyl-prolyl cis-trans isomerase CYP19-3 [Morus notabilis]	175	300	768	1e-102	141	175	0.8	156	175	0.89
comp76835_c0_seq1_6	430	ref|XP_004287702.1| PREDICTED: thioredoxin reductase 2-like [Fragaria vesca subsp.vesca]	333	468	1203	1e-162	232	329	0.7	252	329	0.76	2	329	0
comp100621_c0_seq1_34	749	ref|XP_010087293.1| Subtilisin-like protease [Morus notabilis]gb|EXB28740.1| Subtilisin-like protease [Morus notabilis]	743	1191	3082	0	577	743	0.77	654	743	0.88	4	743	0
comp89896_c0_seq1_15	264	ref|XP_006444641.1| hypothetical protein CICLE_v10021681mg [Citrus clementina]ref|XP_006444644.1| hypothetical protein CICLE_v10021681mg [Citrus clementina]ref|XP_006492443.1| PREDICTED: peptidyl-prolyl cis-trans isomerase CYP20-3,chloroplastic-like isoform X2 [Citrus sinensis]gb|ESR57881.1| hypothetical protein CICLE_v10021681mg [Citrus clementina]gb|ESR57884.1| hypothetical protein CICLE_v10021…	237	297	761	4e-99	144	180	0.8	156	180	0.86	2	180	0.01
comp83423_c1_seq5_25	1148	ref|XP_007217084.1| hypothetical protein PRUPE_ppa000531mg [Prunus persica]gb|EMJ18283.1| hypothetical protein PRUPE_ppa000531mg [Prunus persica]	1112	1815	4700	0	899	1124	0.79	977	1124	0.86	20	1124	0.01
comp71822_c0_seq1_32	621	ref|XP_006384733.1| chaperonin family protein [Populus trichocarpa]gb|ERP62530.1| chaperonin family protein [Populus trichocarpa]	561	1025	2650	0	493	530	0.93	513	530	0.96
comp60684_c0_seq2_41	563	emb|CAN74796.1| hypothetical protein VITISV_000290 [Vitis vinifera]	557	1043	2697	0	509	557	0.91	531	557	0.95	1	557	0
comp68430_c0_seq1_11	477	ref|XP_010108775.1| Protease Do-like 1 [Morus notabilis]gb|EXC20290.1| Protease Do-like 1 [Morus notabilis]	457	681	1756	0	368	463	0.79	388	463	0.83	23	463	0.04
comp1071095_c0_seq1_3	80	ref|WP_017286920.1| molecular chaperone GroES [Leptolyngbya boryana]	103	140	353	3e-42	71	72	0.98	71	72	0.98
comp84581_c0_seq2_82	934	ref|XP_007198928.1| hypothetical protein PRUPE_ppa001162mg [Prunus persica]gb|EMJ00127.1| hypothetical protein PRUPE_ppa001162mg [Prunus persica]	892	1474	3817	0	716	846	0.84	757	846	0.89
comp84581_c0_seq2_82	934	ref|XP_007198928.1| hypothetical protein PRUPE_ppa001162mg [Prunus persica]gb|EMJ00127.1| hypothetical protein PRUPE_ppa001162mg [Prunus persica]	892	1474	3817	0	716	846	0.84	757	846	0.89
comp76360_c1_seq2_6	292	ref|XP_010086580.1| Hypersensitive-induced response protein 1 [Morus notabilis]gb|EXB20735.1| Hypersensitive-induced response protein 1 [Morus notabilis]	286	575	1483	0	276	286	0.96	282	286	0.98
comp74168_c0_seq1_25	269	ref|XP_010088475.1| Proteasome subunit alpha type-3 [Morus notabilis]gb|EXB36245.1| Proteasome subunit alpha type-3 [Morus notabilis]	249	461	1185	1e-163	224	249	0.89	229	249	0.91
comp66935_c0_seq1_18	168	ref|XP_010100791.1| FK506-binding protein 2 [Morus notabilis]gb|EXB84489.1| FK506-binding protein 2 [Morus notabilis]	152	214	545	3e-69	105	132	0.79	113	132	0.85	4	132	0.03
comp82860_c0_seq1_45	770	ref|XP_010105478.1| Subtilisin-like protease [Morus notabilis]gb|EXC04834.1| Subtilisin-like protease [Morus notabilis]	768	1137	2942	0	553	754	0.73	611	754	0.81	1	754	0
comp28451_c0_seq1_29	400	ref|XP_007024818.1| Rad23 UV excision repair protein family isoform 1 [Theobroma cacao]gb|EOY27440.1| Rad23 UV excision repair protein family isoform 1 [Theobroma cacao]	373	551	1419	0	278	373	0.74	287	373	0.76	4	373	0.01
comp34605_c0_seq1_15	225	ref|XP_001696432.1| heat shock protein 70B [Chlamydomonas reinhardtii]gb|EDP08409.1| heat shock protein 70B [Chlamydomonas reinhardtii]	679	327	839	1e-106	162	177	0.91	168	177	0.94	1	177	0
comp82374_c0_seq1_12	586	ref|XP_010098196.1| Protein disulfide isomerase-like 1-4 [Morus notabilis]gb|EXB74652.1| Protein disulfide isomerase-like 1-4 [Morus notabilis]	583	835	2157	0	423	587	0.72	465	587	0.79	12	587	0.02
comp56333_c0_seq1_16	124	ref|XP_010094824.1| Peptidyl-prolyl cis-trans isomerase FKBP12 [Morus notabilis]gb|EXB57310.1| Peptidyl-prolyl cis-trans isomerase FKBP12 [Morus notabilis]	112	219	559	1e-72	106	112	0.94	109	112	0.97
comp81718_c0_seq1_15	852	ref|XP_008386081.1| PREDICTED: ubiquitin carboxyl-terminal hydrolase 14-like [Malusdomestica]	807	1404	3633	0	668	809	0.82	714	809	0.88	2	809	0
comp73150_c0_seq1_26	430	ref|XP_007222547.1| hypothetical protein PRUPE_ppa006204mg [Prunus persica]gb|EMJ23746.1| hypothetical protein PRUPE_ppa006204mg [Prunus persica]	422	716	1847	0	355	422	0.84	370	422	0.87
comp39361_c0_seq1_24	380	ref|XP_010105270.1| Cysteine proteinase 15A [Morus notabilis]gb|EXC04205.1| Cysteine proteinase 15A [Morus notabilis]	372	624	1609	0	303	349	0.86	320	349	0.91	5	349	0.01
comp68497_c0_seq2_3	184	ref|XP_006680755.1| hypothetical protein BATDEDRAFT_30413 [Batrachochytriumdendrobatidis JAM81]gb|EGF78617.1| hypothetical protein BATDEDRAFT_30413 [Batrachochytriumdendrobatidis JAM81]	243	295	754	2e-99	134	179	0.74	158	179	0.88	3	179	0.01
comp82271_c0_seq1_23	222	ref|XP_008240792.1| PREDICTED: probable glutathione S-transferase parA [Prunus mume]	218	348	892	1e-120	162	218	0.74	192	218	0.88	1	218	0
comp69170_c0_seq1_16	275	ref|XP_007027930.1| 2-cysteine peroxiredoxin B [Theobroma cacao]gb|EOY08432.1| 2-cysteine peroxiredoxin B [Theobroma cacao]	266	386	992	1e-133	180	194	0.92	190	194	0.97
comp71391_c0_seq1_7	258	ref|XP_010092541.1| Peptide methionine sulfoxide reductase [Morus notabilis]gb|EXB51450.1| Peptide methionine sulfoxide reductase [Morus notabilis]	221	305	780	1e-102	153	226	0.67	166	226	0.73	6	226	0.02
comp39728_c0_seq1_33	510	ref|XP_010088378.1| Ubiquitin carboxyl-terminal hydrolase 6 [Morus notabilis]gb|EXB34852.1| Ubiquitin carboxyl-terminal hydrolase 6 [Morus notabilis]	693	806	2082	0	390	481	0.81	410	481	0.85	6	481	0.01
comp39728_c0_seq1_33	510	ref|XP_010088378.1| Ubiquitin carboxyl-terminal hydrolase 6 [Morus notabilis]gb|EXB34852.1| Ubiquitin carboxyl-terminal hydrolase 6 [Morus notabilis]	693	806	2082	0	390	481	0.81	410	481	0.85	6	481	0.01
comp59349_c0_seq1_22	244	gb|AGO64480.1| dehydroascorbate reductase [Rosa roxburghii]	213	328	842	1e-112	161	199	0.8	174	199	0.87
comp57223_c0_seq1_26	299	ref|XP_008222244.1| PREDICTED: ubiquitin thioesterase otubain-like [Prunus mume]ref|XP_008222245.1| PREDICTED: ubiquitin thioesterase otubain-like [Prunus mume]	302	495	1274	1e-175	241	302	0.79	265	302	0.87	5	302	0.01
comp20289_c0_seq1_16	283	gb|ACF24565.1| proteasome alpha 4 subunit [Gymnochlora stellata]	249	354	908	1e-121	168	228	0.73	194	228	0.85	1	228	0
comp80307_c0_seq1_10	311	ref|XP_010099911.1| hypothetical protein L484_020098 [Morus notabilis]gb|EXB80840.1| hypothetical protein L484_020098 [Morus notabilis]	308	434	1115	1e-151	216	309	0.69	250	309	0.8	2	309	0
comp77953_c0_seq1_41	594	ref|XP_003518226.1| PREDICTED: T-complex protein 1 subunit theta-like [Glycine max]	545	1036	2679	0	500	547	0.91	533	547	0.97	2	547	0
comp45866_c0_seq1_9	207	gb|EXX52094.1| proteasome regulatory particle base subunit RPT1 [Rhizophagusirregularis DAOM 197198w]	347	342	878	1e-116	165	207	0.79	187	207	0.9	1	207	0
comp604470_c0_seq1_2	112	ref|WP_017291454.1| thioredoxin [Leptolyngbya boryana]	107	221	563	1e-73	107	107	1	107	107	1
comp84447_c0_seq1_52	3680	ref|XP_010105037.1| E3 ubiquitin-protein ligase UPL2 [Morus notabilis]gb|EXC03335.1| E3 ubiquitin-protein ligase UPL2 [Morus notabilis]	3644	5917	15350	0	2955	3672	0.8	3129	3672	0.85	58	3672	0.01
comp85751_c1_seq5_4	225	ref|XP_010101872.1| putative glutathione S-transferase [Morus notabilis]gb|EXB90009.1| putative glutathione S-transferase [Morus notabilis]	217	279	713	6e-93	134	218	0.61	163	218	0.74	2	218	0
comp83153_c0_seq1_59	998	ref|XP_007028740.1| Insulinase (Peptidase family M16) family protein isoform 1[Theobroma cacao]gb|EOY09242.1| Insulinase (Peptidase family M16) family protein isoform 1[Theobroma cacao]	965	1659	4297	0	774	968	0.79	876	968	0.9	3	968	0
comp74009_c0_seq1_24	508	ref|XP_003631925.1| PREDICTED: catalase isozyme 1-like [Vitis vinifera]	492	814	2103	0	379	467	0.81	427	467	0.91
comp82272_c0_seq1_18	604	gb|AGQ43559.1| nitrite reductase [Morus alba]	587	1055	2728	0	510	592	0.86	544	592	0.91	6	592	0.01
comp76707_c0_seq1_17	328	ref|XP_010654358.1| PREDICTED: ATPase 10, plasma membrane-type [Vitis vinifera]	949	563	1452	0	279	327	0.85	288	327	0.88
comp79321_c1_seq1_10	122	ref|XP_010088759.1| Copper transport protein ATOX1 [Morus notabilis]gb|EXB36942.1| Copper transport protein ATOX1 [Morus notabilis]	106	125	314	2e-35	61	67	0.91	63	67	0.94
comp66790_c0_seq1_6	383	ref|XP_002265774.1| PREDICTED: ferredoxin--NADP reductase, leaf-type isozyme,chloroplastic [Vitis vinifera]emb|CBI17370.3| unnamed protein product [Vitis vinifera]	362	649	1675	0	325	364	0.89	343	364	0.94	8	364	0.02
comp81455_c1_seq2_27	452	ref|XP_008439552.1| PREDICTED: ferredoxin--NADP reductase, root isozyme, chloroplastic[Cucumis melo]	379	696	1795	0	326	379	0.86	355	379	0.93	2	379	0
comp77503_c0_seq1_13	587	ref|XP_010102341.1| 2-oxoglutarate/malate translocator [Morus notabilis]gb|EXB93302.1| 2-oxoglutarate/malate translocator [Morus notabilis]	565	773	1995	0	412	565	0.72	436	565	0.77	4	565	0
comp81586_c0_seq1_12	497	ref|XP_010108404.1| 2-oxoglutarate/malate translocator [Morus notabilis]gb|EXC19408.1| 2-oxoglutarate/malate translocator [Morus notabilis]	565	728	1879	0	360	470	0.76	403	470	0.85
comp79594_c0_seq2_41	588	ref|XP_010108288.1| Protein TIC 55 [Morus notabilis]gb|EXC18768.1| Protein TIC 55 [Morus notabilis]	541	863	2230	0	404	483	0.83	438	483	0.9	1	483	0
comp84153_c0_seq1_11	630	ref|XP_007024799.1| Autoinhibited H(+)-ATPase isoform 2 [Theobroma cacao]ref|XP_007024800.1| Autoinhibited H(+)-ATPase isoform 2 [Theobroma cacao]gb|EOY27421.1| Autoinhibited H(+)-ATPase isoform 2 [Theobroma cacao]gb|EOY27422.1| Autoinhibited H(+)-ATPase isoform 2 [Theobroma cacao]	952	1170	3028	0	564	631	0.89	601	631	0.95	1	631	0
comp83579_c0_seq1_15	283	ref|XP_010101209.1| Carbonic anhydrase 2 [Morus notabilis]gb|EXB87883.1| Carbonic anhydrase 2 [Morus notabilis]	267	324	830	1e-109	167	239	0.69	191	239	0.79	6	239	0.02
comp99679_c0_seq1_13	565	ref|XP_001700410.1| oxoglutarate:malate antiporter [Chlamydomonas reinhardtii]gb|EDO98099.1| oxoglutarate:malate antiporter [Chlamydomonas reinhardtii]	553	690	1780	0	360	471	0.76	398	471	0.84
comp73216_c0_seq3_24	999	ref|XP_007011592.1| Plasma membrane ATPase 4 isoform 1 [Theobroma cacao]gb|EOY29211.1| Plasma membrane ATPase 4 isoform 1 [Theobroma cacao]	954	1696	4391	0	825	954	0.86	858	954	0.89
comp68253_c0_seq1_11	306	ref|XP_010109152.1| Protein Fe superoxide dismutase 1 [Morus notabilis]gb|EXC21081.1| Protein Fe superoxide dismutase 1 [Morus notabilis]	311	375	962	1e-128	186	268	0.69	206	268	0.76	21	268	0.07
comp77272_c0_seq6_8	422	ref|XP_010102357.1| ZmSiR protein [Morus notabilis]gb|EXB93318.1| ZmSiR protein [Morus notabilis]	690	538	1386	0	267	309	0.86	278	309	0.89	4	309	0.01
comp74054_c0_seq1_9	333	ref|XP_010108776.1| Carbonic anhydrase [Morus notabilis]gb|EXC20291.1| Carbonic anhydrase [Morus notabilis]	332	515	1326	0	267	323	0.82	292	323	0.9	5	323	0.01
comp351645_c0_seq1_4	153	gb|ACO50119.1| elongation factor 1 alpha-like protein, partial [Diplonemapapillatum]	464	247	630	4e-78	115	153	0.75	132	153	0.86	1	153	0
comp85771_c0_seq2_35	1440	ref|XP_010093208.1| Pleiotropic drug resistance protein 2 [Morus notabilis]gb|EXB53706.1| Pleiotropic drug resistance protein 2 [Morus notabilis]	1538	2507	6498	0	1216	1452	0.83	1291	1452	0.88	19	1452	0.01
comp85771_c0_seq2_35	1440	ref|XP_010093208.1| Pleiotropic drug resistance protein 2 [Morus notabilis]gb|EXB53706.1| Pleiotropic drug resistance protein 2 [Morus notabilis]	1538	2507	6498	0	1216	1452	0.83	1291	1452	0.88	19	1452	0.01
comp64043_c0_seq1_10	494	ref|XP_006467495.1| PREDICTED: 3-oxoacyl-[acyl-carrier-protein] synthase I,chloroplastic-like [Citrus sinensis]gb|KDO78133.1| hypothetical protein CISIN_1g012221mg [Citrus sinensis]	468	825	2132	0	405	469	0.86	426	469	0.9	2	469	0
comp80682_c0_seq1_27	309	ref|XP_010090490.1| hypothetical protein L484_012597 [Morus notabilis]gb|EXB39589.1| hypothetical protein L484_012597 [Morus notabilis]	307	538	1385	0	256	307	0.83	272	307	0.88
comp78255_c0_seq1_37	622	ref|XP_010106221.1| Monocopper oxidase-like protein SKS1 [Morus notabilis]gb|EXC08927.1| Monocopper oxidase-like protein SKS1 [Morus notabilis]	594	1010	2612	0	479	545	0.87	509	545	0.93
comp60380_c0_seq2_8	576	ref|XP_010093149.1| L-ascorbate oxidase-like protein [Morus notabilis]gb|EXB53608.1| L-ascorbate oxidase-like protein [Morus notabilis]	550	882	2278	0	431	536	0.8	468	536	0.87	7	536	0.01
comp83832_c0_seq3_8	299	ref|XP_010112593.1| Sex determination protein tasselseed-2 [Morus notabilis]gb|EXC34228.1| Sex determination protein tasselseed-2 [Morus notabilis]	261	341	875	1e-115	182	272	0.66	212	272	0.77	18	272	0.06
comp85136_c0_seq3_9	411	gb|AGW24283.1| chalcone synthase [Melastoma malabathricum]	391	733	1892	0	350	389	0.89	367	389	0.94
comp76574_c0_seq1_42	615	ref|XP_010093686.1| Monocopper oxidase-like protein SKU5 [Morus notabilis]gb|EXB54466.1| Monocopper oxidase-like protein SKU5 [Morus notabilis]	591	1080	2794	0	517	591	0.87	543	591	0.91	1	591	0
comp81091_c0_seq2_41	590	ref|XP_010101849.1| hypothetical protein L484_023639 [Morus notabilis]gb|EXB89986.1| hypothetical protein L484_023639 [Morus notabilis]	569	819	2116	0	389	548	0.7	445	548	0.81	5	548	0
comp62931_c0_seq2_10	121	ref|WP_006635059.1| MULTISPECIES: carbon dioxide-concentrating protein CcmK[Oscillatoriales]ref|YP_007117838.1| microcompartments protein [Oscillatoria nigro-viridis PCC 7112]gb|EGK84905.1| microcompartments protein [Microcoleus vaginatus FGP-2]gb|AFZ09422.1| microcompartments protein [Oscillatoria nigro-viridis PCC 7112]	103	203	516	3e-66	103	103	1	103	103	1
comp82626_c0_seq11_4	276	ref|XP_010104812.1| Momilactone A synthase [Morus notabilis]gb|EXC01953.1| Momilactone A synthase [Morus notabilis]	275	437	1124	1e-153	211	275	0.76	236	275	0.85
comp76173_c0_seq1_27	280	ref|XP_004287959.1| PREDICTED: protein usf-like [Fragaria vesca subsp. vesca]	281	432	1111	1e-151	207	260	0.79	226	260	0.86	4	260	0.01
comp72877_c0_seq2_39	598	ref|XP_007016684.1| Plant L-ascorbate oxidase [Theobroma cacao]gb|EOY34303.1| Plant L-ascorbate oxidase [Theobroma cacao]	575	952	2461	0	437	558	0.78	488	558	0.87
comp79866_c0_seq1_10	548	ref|XP_004294725.1| PREDICTED: trans-cinnamate 4-monooxygenase-like [Fragaria vescasubsp. vesca]	504	870	2247	0	420	504	0.83	452	504	0.89
comp69273_c0_seq1_5	303	ref|XP_010276407.1| PREDICTED: short-chain type dehydrogenase/reductase-like [Nelumbonucifera]	268	402	1033	1e-139	199	271	0.73	227	271	0.83	5	271	0.01
comp920947_c0_seq1_4	119	ref|WP_017290237.1| carbon dioxide-concentrating protein CcmK [Leptolyngbya boryana]	113	223	567	6e-74	113	113	1	113	113	1
comp63172_c0_seq1_31	549	ref|XP_010086796.1| Cytochrome P450 71A1 [Morus notabilis]gb|EXB23806.1| Cytochrome P450 71A1 [Morus notabilis]	514	850	2197	0	425	515	0.82	456	515	0.88	4	515	0
comp85102_c1_seq1_6	433	ref|XP_007202080.1| hypothetical protein PRUPE_ppa007396mg [Prunus persica]gb|EMJ03279.1| hypothetical protein PRUPE_ppa007396mg [Prunus persica]	369	490	1262	1e-170	248	345	0.71	285	345	0.82	6	345	0.01
comp76446_c0_seq1_26	358	gb|AAY82488.1| chitinase [Ulmus pumila]	317	467	1201	1e-163	227	298	0.76	248	298	0.83
comp39152_c0_seq1_22	247	ref|XP_007025885.1| Quinone reductase family protein [Theobroma cacao]gb|EOY28507.1| Quinone reductase family protein [Theobroma cacao]	209	357	916	1e-123	171	203	0.84	185	203	0.91
comp71251_c0_seq1_7	258	ref|XP_010099827.1| Minor allergen Alt a 7 [Morus notabilis]gb|EXB80587.1| Minor allergen Alt a 7 [Morus notabilis]	260	411	1056	1e-144	212	260	0.81	221	260	0.85	8	260	0.03
comp94943_c0_seq1_28	399	ref|XP_010100371.1| GDSL esterase/lipase [Morus notabilis]gb|EXB82505.1| GDSL esterase/lipase [Morus notabilis]	386	570	1468	0	278	385	0.72	309	385	0.8	13	385	0.03
comp84285_c0_seq2_11	466	ref|XP_010092799.1| Pyruvate decarboxylase isozyme 2 [Morus notabilis]gb|EXB52385.1| Pyruvate decarboxylase isozyme 2 [Morus notabilis]	606	912	2358	0	433	466	0.92	451	466	0.96
comp75095_c0_seq1_23	322	ref|XP_010108764.1| Quinone oxidoreductase-like protein [Morus notabilis]gb|EXC20279.1| Quinone oxidoreductase-like protein [Morus notabilis]	323	399	1026	1e-137	204	309	0.66	227	309	0.73
comp68862_c0_seq2_5	198	ref|XP_003618207.1| ADP-ribosylation factor [Medicago truncatula]	248	380	977	1e-133	181	187	0.96	184	187	0.98
comp68862_c0_seq2_5	198	ref|XP_003618207.1| ADP-ribosylation factor [Medicago truncatula]	248	380	977	1e-133	181	187	0.96	184	187	0.98
comp67659_c0_seq1_38	662	ref|XP_010094074.1| hypothetical protein L484_018090 [Morus notabilis]gb|EXB55164.1| hypothetical protein L484_018090 [Morus notabilis]	654	275	703	6e-80	150	267	0.56	173	267	0.64	15	267	0.05
comp84948_c1_seq3_13	791	ref|XP_010107187.1| Nudix hydrolase 3 [Morus notabilis]gb|EXC14083.1| Nudix hydrolase 3 [Morus notabilis]	800	1354	3504	0	650	802	0.81	718	802	0.89	31	802	0.03
comp77844_c0_seq1_37	560	ref|XP_010086967.1| CBS domain-containing protein [Morus notabilis]gb|EXB25246.1| CBS domain-containing protein [Morus notabilis]	543	836	2159	0	424	549	0.77	449	549	0.81	8	549	0.01
comp77452_c0_seq3_68	901	ref|XP_004294067.1| PREDICTED: probable LRR receptor-like serine/threonine-proteinkinase At1g53430-like [Fragaria vesca subsp. vesca]	1016	1122	2902	0	572	892	0.64	684	892	0.76	13	892	0.01
comp85560_c0_seq3_26	1219	ref|XP_007213296.1| hypothetical protein PRUPE_ppa000388mg [Prunus persica]gb|EMJ14495.1| hypothetical protein PRUPE_ppa000388mg [Prunus persica]	1217	2234	5788	0	1058	1217	0.86	1127	1217	0.92	1	1217	0
comp78863_c0_seq1_57	938	ref|XP_010112052.1| hypothetical protein L484_012638 [Morus notabilis]gb|EXC32471.1| hypothetical protein L484_012638 [Morus notabilis]	925	1522	3940	0	774	915	0.84	809	915	0.88	7	915	0
comp63641_c0_seq1_7	304	ref|XP_010094107.1| Endochitinase [Morus notabilis]gb|EXB55197.1| Endochitinase [Morus notabilis]	279	475	1222	1e-168	224	279	0.8	247	279	0.88	1	279	0
comp75393_c0_seq1_10	581	ref|XP_010089616.1| putative mitochondrial-processing peptidase subunit beta [Morusnotabilis]gb|EXB38087.1| putative mitochondrial-processing peptidase subunit beta [Morusnotabilis]	534	874	2257	0	417	480	0.86	439	480	0.91
comp61201_c0_seq1_8	363	ref|XP_010094078.1| hypothetical protein L484_018094 [Morus notabilis]gb|EXB55168.1| hypothetical protein L484_018094 [Morus notabilis]	415	638	1646	0	311	356	0.87	332	356	0.93	1	356	0
comp87390_c0_seq1_16	639	ref|XP_010095584.1| Probably inactive leucine-rich repeat receptor-like protein kinase[Morus notabilis]gb|EXB61157.1| Probably inactive leucine-rich repeat receptor-like protein kinase[Morus notabilis]	602	968	2503	0	467	622	0.75	525	622	0.84	24	622	0.03
comp39010_c0_seq1_17	919	ref|XP_010110280.1| Coatomer subunit beta'-2 [Morus notabilis]gb|EXC25800.1| Coatomer subunit beta'-2 [Morus notabilis]	1113	1785	4623	0	857	917	0.93	878	917	0.95	7	917	0
comp85163_c0_seq3_69	615	ref|XP_010093040.1| putative LRR receptor-like serine/threonine-protein kinase [Morusnotabilis]gb|EXB53368.1| putative LRR receptor-like serine/threonine-protein kinase [Morusnotabilis]	1105	952	2460	0	466	646	0.72	528	646	0.81	36	646	0.05
comp76413_c0_seq1_45	747	ref|XP_008461500.1| PREDICTED: eukaryotic translation initiation factor 3 subunitB-like [Cucumis melo]	718	1275	3300	0	612	718	0.85	652	718	0.9
comp41704_c0_seq2_8	321	ref|XP_010090909.1| 5'-nucleotidase surE [Morus notabilis]gb|EXB41281.1| 5'-nucleotidase surE [Morus notabilis]	310	456	1172	1e-159	212	297	0.71	243	297	0.81
comp78258_c0_seq1_5	363	ref|XP_004287950.1| PREDICTED: NADP-dependent alkenal double bond reductase P1-like[Fragaria vesca subsp. vesca]	357	525	1351	0	250	358	0.69	309	358	0.86	6	358	0.01
comp78258_c0_seq1_5	363	ref|XP_004287950.1| PREDICTED: NADP-dependent alkenal double bond reductase P1-like[Fragaria vesca subsp. vesca]	357	525	1351	0	250	358	0.69	309	358	0.86	6	358	0.01
comp77404_c1_seq1_13	493	ref|XP_010088385.1| IAA-amino acid hydrolase ILR1-like 4 [Morus notabilis]gb|EXB34859.1| IAA-amino acid hydrolase ILR1-like 4 [Morus notabilis]	445	748	1931	0	372	445	0.83	400	445	0.89	4	445	0
comp79594_c0_seq2_41	588	ref|XP_010108288.1| Protein TIC 55 [Morus notabilis]gb|EXC18768.1| Protein TIC 55 [Morus notabilis]	541	863	2230	0	404	483	0.83	438	483	0.9	1	483	0
comp83832_c0_seq3_8	299	ref|XP_010112593.1| Sex determination protein tasselseed-2 [Morus notabilis]gb|EXC34228.1| Sex determination protein tasselseed-2 [Morus notabilis]	261	341	875	1e-115	182	272	0.66	212	272	0.77	18	272	0.06
comp66961_c0_seq6_24	202	ref|XP_008236997.1| PREDICTED: glycine-rich RNA-binding protein GRP1A [Prunus mume]	133	99.4	246	1e-23	47	52	0.9	49	52	0.94
comp58892_c0_seq1_6	225	ref|XP_010098799.1| Glycine-rich RNA-binding, abscisic acid-inducible protein [Morusnotabilis]gb|EXB75887.1| Glycine-rich RNA-binding, abscisic acid-inducible protein [Morusnotabilis]	272	233	594	5e-74	113	135	0.83	121	135	0.89
comp80701_c0_seq2_7	322	ref|XP_001780288.1| predicted protein [Physcomitrella patens]gb|EDQ54847.1| predicted protein [Physcomitrella patens]	316	530	1366	0	263	316	0.83	287	316	0.9	3	316	0
comp81483_c0_seq3_30	250	ref|XP_010105917.1| Serine/arginine-rich splicing factor 2 [Morus notabilis]gb|EXC06736.1| Serine/arginine-rich splicing factor 2 [Morus notabilis]	295	169	429	2e-48	82	84	0.97	83	84	0.98
comp80940_c0_seq2_13	605	ref|XP_010090263.1| Zeta-carotene desaturase [Morus notabilis]gb|EXB39201.1| Zeta-carotene desaturase [Morus notabilis]	581	1097	2837	0	538	581	0.92	561	581	0.96
comp66131_c0_seq3_34	630	ref|XP_008374241.1| PREDICTED: probable inactive purple acid phosphatase 27 [Malusdomestica]	637	1081	2795	0	503	599	0.83	545	599	0.9	2	599	0
comp71325_c0_seq1_9	341	ref|XP_010112403.1| putative nitronate monooxygenase [Morus notabilis]gb|EXC33398.1| putative nitronate monooxygenase [Morus notabilis]	332	536	1380	0	262	329	0.79	293	329	0.89	1	329	0
comp80618_c0_seq1_18	296	ref|XP_010113421.1| hypothetical protein L484_026755 [Morus notabilis]gb|EXC35448.1| hypothetical protein L484_026755 [Morus notabilis]	271	529	1363	0	252	271	0.92	265	271	0.97
comp76200_c0_seq2_31	384	ref|XP_007201331.1| hypothetical protein PRUPE_ppa007619mg [Prunus persica]gb|EMJ02530.1| hypothetical protein PRUPE_ppa007619mg [Prunus persica]	361	541	1395	0	256	362	0.7	305	362	0.84	8	362	0.02
comp72441_c0_seq1_55	854	ref|XP_010112241.1| Dynamin-related protein 3A [Morus notabilis]gb|EXC32997.1| Dynamin-related protein 3A [Morus notabilis]	840	1394	3607	0	681	805	0.84	721	805	0.89	4	805	0
comp39387_c0_seq2_49	580	ref|XP_010108431.1| Pyruvate decarboxylase isozyme 1 [Morus notabilis]gb|EXC19459.1| Pyruvate decarboxylase isozyme 1 [Morus notabilis]	589	1022	2642	0	481	534	0.9	514	534	0.96
comp76373_c0_seq1_11	511	emb|CAN80681.1| hypothetical protein VITISV_037734 [Vitis vinifera]	478	381	978	1e-124	215	390	0.55	240	390	0.61	41	390	0.1
comp82626_c0_seq11_4	276	ref|XP_010104812.1| Momilactone A synthase [Morus notabilis]gb|EXC01953.1| Momilactone A synthase [Morus notabilis]	275	437	1124	1e-153	211	275	0.76	236	275	0.85
comp74924_c0_seq1_39	709	ref|XP_010103454.1| NADH dehydrogenase [ubiquinone] iron-sulfur protein 1 [Morusnotabilis]gb|EXB95899.1| NADH dehydrogenase [ubiquinone] iron-sulfur protein 1 [Morusnotabilis]	749	1314	3400	0	632	691	0.91	653	691	0.94	2	691	0
comp75235_c0_seq2_16	258	ref|XP_006371951.1| hypothetical protein POPTR_0018s06630g [Populus trichocarpa]gb|ERP49748.1| hypothetical protein POPTR_0018s06630g [Populus trichocarpa]	236	354	908	1e-121	168	236	0.71	202	236	0.85	1	236	0
comp75278_c0_seq1_18	179	ref|XP_010090578.1| Glycine-rich RNA-binding protein 2 [Morus notabilis]gb|EXB39885.1| Glycine-rich RNA-binding protein 2 [Morus notabilis]	151	186	471	9e-58	85	116	0.73	103	116	0.88
comp81516_c0_seq1_88	996	ref|XP_010113026.1| putative leucine-rich repeat receptor-like protein kinase [Morusnotabilis]gb|EXC35197.1| putative leucine-rich repeat receptor-like protein kinase [Morusnotabilis]	964	1493	3864	0	732	968	0.75	831	968	0.85	8	968	0
comp87096_c0_seq1_10	431	ref|XP_010108425.1| Magnesium-chelatase subunit chlI [Morus notabilis]gb|EXC19453.1| Magnesium-chelatase subunit chlI [Morus notabilis]	418	693	1788	0	358	422	0.84	374	422	0.88	4	422	0
comp1575789_c0_seq1_7	277	ref|XP_004359994.1| transcriptional repressor TUP1 [Dictyostelium fasciculatum]gb|EGG22143.1| transcriptional repressor TUP1 [Dictyostelium fasciculatum]	539	468	1205	1e-162	221	277	0.79	243	277	0.87
comp12597_c0_seq1_4	131	ref|XP_004517258.1| PREDICTED: 26S proteasome non-ATPase regulatory subunit 14-likeisoform X2 [Cicer arietinum]	259	267	682	4e-89	121	131	0.92	129	131	0.98
comp78404_c0_seq2_46	509	ref|XP_010089047.1| Monodehydroascorbate reductase [Morus notabilis]gb|EXB37294.1| Monodehydroascorbate reductase [Morus notabilis]	491	831	2146	0	420	495	0.84	448	495	0.9	13	495	0.02
comp69273_c0_seq1_5	303	ref|XP_010276407.1| PREDICTED: short-chain type dehydrogenase/reductase-like [Nelumbonucifera]	268	402	1033	1e-139	199	271	0.73	227	271	0.83	5	271	0.01
comp84936_c0_seq1_28	428	gb|ABK93944.1| unknown [Populus trichocarpa]	392	637	1642	0	293	357	0.82	322	357	0.9
comp76812_c0_seq1_16	244	gb|ACJ38195.1| chitinase [Malus hupehensis]	316	301	771	1e-100	147	217	0.67	164	217	0.75	4	217	0.01
comp78347_c0_seq1_25	1148	ref|XP_010089636.1| LRR receptor-like serine/threonine-protein kinase RPK2 [Morusnotabilis]gb|EXB38107.1| LRR receptor-like serine/threonine-protein kinase RPK2 [Morusnotabilis]	1155	1710	4428	0	847	1109	0.76	931	1109	0.83	6	1109	0
comp30171_c0_seq1_75	633	ref|XP_001755358.1| predicted protein [Physcomitrella patens]gb|EDQ79838.1| predicted protein [Physcomitrella patens]	582	512	1318	1e-173	274	572	0.47	354	572	0.61	31	572	0.05
comp174693_c0_seq1_7	83	ref|WP_015181430.1| stress-induced acidophilic repeat motif-containing protein[Microcoleus sp. PCC 7113]ref|YP_007120676.1| stress-induced acidophilic repeat motif-containing protein[Microcoleus sp. PCC 7113]gb|AFZ17270.1| stress-induced acidophilic repeat motif-containing protein[Microcoleus sp. PCC 7113]	74	111	277	7e-31	58	74	0.78	61	74	0.82
comp64684_c0_seq1_8	241	ref|XP_003616096.1| Cbs domain protein [Medicago truncatula]	242	366	940	1e-127	177	213	0.83	192	213	0.9	1	213	0
comp83339_c0_seq1_71	1288	ref|XP_010089232.1| Serine/threonine-protein kinase [Morus notabilis]gb|EXB37530.1| Serine/threonine-protein kinase [Morus notabilis]	1232	1614	4179	0	848	1291	0.65	951	1291	0.73	75	1291	0.05
comp27750_c0_seq2_7	165	ref|XP_007202700.1| hypothetical protein PRUPE_ppa012689mg [Prunus persica]gb|EMJ03899.1| hypothetical protein PRUPE_ppa012689mg [Prunus persica]	158	239	611	3e-79	116	158	0.73	127	158	0.8	1	158	0
comp78570_c0_seq2_30	395	ref|XP_007215709.1| hypothetical protein PRUPE_ppa008913mg [Prunus persica]gb|EMJ16908.1| hypothetical protein PRUPE_ppa008913mg [Prunus persica]	314	305	781	5e-99	190	337	0.56	211	337	0.62	50	337	0.14
comp69508_c0_seq1_21	431	ref|XP_007215536.1| hypothetical protein PRUPE_ppa007179mg [Prunus persica]gb|EMJ16735.1| hypothetical protein PRUPE_ppa007179mg [Prunus persica]	379	337	865	1e-110	169	228	0.74	187	228	0.82	1	228	0
comp84406_c0_seq2_21	401	ref|XP_010094864.1| Uncharacterized protein ycf37 [Morus notabilis]gb|EXB57393.1| Uncharacterized protein ycf37 [Morus notabilis]	349	383	983	1e-129	191	233	0.81	207	233	0.88
comp83613_c0_seq1_55	1033	ref|XP_003632548.1| PREDICTED: probable LRR receptor-like serine/threonine-protein kinaseAt1g06840 isoform X1 [Vitis vinifera]	949	1005	2598	0	542	983	0.55	663	983	0.67	35	983	0.03
comp347627_c0_seq1_16	265	ref|XP_010314133.1| PREDICTED: cyclin-dependent kinase E-1 isoform X2 [Solanumlycopersicum]	456	323	828	1e-106	152	233	0.65	180	233	0.77
comp73690_c0_seq1_12	412	ref|XP_004145107.1| PREDICTED: polyadenylate-binding protein RBP45-like [Cucumissativus]ref|XP_004153511.1| PREDICTED: polyadenylate-binding protein RBP45-like [Cucumissativus]	408	541	1394	0	256	320	0.8	280	320	0.87	4	320	0.01
comp1936_c0_seq2_4	118	ref|XP_003284458.1| rab11A, RAB family GTPase [Dictyostelium purpureum]gb|EGC39005.1| rab11A, RAB family GTPase [Dictyostelium purpureum]	217	222	565	4e-72	106	118	0.89	114	118	0.96
comp80862_c1_seq1_22	359	ref|XP_007026771.1| RP non-ATPase subunit 8A [Theobroma cacao]gb|EOY07273.1| RP non-ATPase subunit 8A [Theobroma cacao]	310	612	1579	0	299	310	0.96	306	310	0.98
comp42763_c0_seq1_6	156	ref|XP_006678916.1| calmodulin [Batrachochytrium dendrobatidis JAM81]gb|EGF80478.1| calmodulin [Batrachochytrium dendrobatidis JAM81]	169	274	700	8e-93	136	148	0.91	144	148	0.97
comp11675_c0_seq1_12	177	ref|XP_009801123.1| PREDICTED: ADP-ribosylation factor-like protein 8B [Nicotianasylvestris]dbj|BAL44264.1| ADP-ribosylation factor-like 8c [Nicotiana tabacum]	184	315	807	1e-108	149	177	0.84	160	177	0.9
comp59599_c0_seq1_10	454	ref|XP_010099094.1| Nucleolysin TIAR [Morus notabilis]gb|EXB76742.1| Nucleolysin TIAR [Morus notabilis]	413	695	1794	0	345	413	0.83	358	413	0.86	10	413	0.02
comp62034_c0_seq1_13	221	ref|XP_010112118.1| Serine/arginine-rich splicing factor 7 [Morus notabilis]gb|EXC32743.1| Serine/arginine-rich splicing factor 7 [Morus notabilis]	187	107	267	7e-26	53	71	0.74	54	71	0.76
comp86093_c0_seq1_8	310	ref|XP_010094101.1| Endochitinase [Morus notabilis]gb|EXB55191.1| Endochitinase [Morus notabilis]	274	402	1033	1e-139	195	270	0.72	222	270	0.82	11	270	0.04
comp38930_c0_seq1_11	653	ref|XP_010104016.1| Dynamin-related protein 5A [Morus notabilis]gb|EXB97807.1| Dynamin-related protein 5A [Morus notabilis]	610	1170	3027	0	573	610	0.93	589	610	0.96
comp73830_c0_seq1_37	887	ref|XP_010105101.1| Leucine-rich repeat receptor-like serine/threonine-protein kinaseBAM1 [Morus notabilis]gb|EXC03886.1| Leucine-rich repeat receptor-like serine/threonine-protein kinaseBAM1 [Morus notabilis]	1021	1281	3314	0	657	859	0.76	702	859	0.81	38	859	0.04
comp85568_c0_seq1_115	1841	ref|XP_007227043.1| hypothetical protein PRUPE_ppa000089mg [Prunus persica]gb|EMJ28242.1| hypothetical protein PRUPE_ppa000089mg [Prunus persica]	1854	2103	5449	0	1072	1508	0.71	1188	1508	0.78	39	1508	0.02
comp37012_c0_seq1_46	430	ref|XP_002274118.2| PREDICTED: probable inactive purple acid phosphatase 1 [Vitisvinifera]ref|XP_010649726.1| PREDICTED: probable inactive purple acid phosphatase 1 [Vitisvinifera]	612	793	2049	0	362	430	0.84	396	430	0.92
comp82623_c0_seq1_21	370	ref|XP_009800853.1| PREDICTED: hydroxyphenylpyruvate reductase-like [Nicotianasylvestris]	313	497	1279	1e-175	234	313	0.74	271	313	0.86
comp81318_c0_seq2_10	566	ref|XP_010091811.1| Cysteine-rich receptor-like protein kinase 3 [Morus notabilis]gb|EXB46019.1| Cysteine-rich receptor-like protein kinase 3 [Morus notabilis]	641	870	2248	0	420	537	0.78	464	537	0.86	2	537	0
comp83153_c0_seq1_59	998	ref|XP_007028740.1| Insulinase (Peptidase family M16) family protein isoform 1[Theobroma cacao]gb|EOY09242.1| Insulinase (Peptidase family M16) family protein isoform 1[Theobroma cacao]	965	1659	4297	0	774	968	0.79	876	968	0.9	3	968	0
comp77424_c0_seq19_21	390	ref|XP_010095280.1| Splicing factor U2af large subunit B [Morus notabilis]gb|EXB59126.1| Splicing factor U2af large subunit B [Morus notabilis]	599	697	1799	0	347	382	0.9	358	382	0.93	2	382	0
comp85223_c0_seq1_92	1757	ref|XP_010107098.1| Brefeldin A-inhibited guanine nucleotide-exchange protein 1 [Morusnotabilis]gb|EXC13619.1| Brefeldin A-inhibited guanine nucleotide-exchange protein 1 [Morusnotabilis]	1756	3052	7913	0	1511	1769	0.85	1576	1769	0.89	45	1769	0.02
comp83973_c1_seq1_25	365	ref|XP_009348744.1| PREDICTED: GDSL esterase/lipase At5g03610-like [Pyrus xbretschneideri]	357	480	1235	1e-168	234	321	0.72	274	321	0.85	4	321	0.01
comp84502_c1_seq1_8	379	ref|XP_010091979.1| DNA-damage-repair/toleration protein [Morus notabilis]gb|EXB48385.1| DNA-damage-repair/toleration protein [Morus notabilis]	367	583	1502	0	292	345	0.84	318	345	0.92
comp77452_c0_seq3_68	901	ref|XP_004294067.1| PREDICTED: probable LRR receptor-like serine/threonine-proteinkinase At1g53430-like [Fragaria vesca subsp. vesca]	1016	1122	2902	0	572	892	0.64	684	892	0.76	13	892	0.01
comp73197_c0_seq1_14	178	gb|AFK93503.1| pathogenesis related protein 1 isoform 4 [Ficus pumila var.awkeotsang]	169	286	733	2e-97	135	163	0.82	148	163	0.9
comp83284_c0_seq1_46	625	ref|XP_010103583.1| putative LRR receptor-like serine/threonine-protein kinase [Morusnotabilis]gb|EXB96360.1| putative LRR receptor-like serine/threonine-protein kinase [Morusnotabilis]	592	881	2276	0	443	592	0.74	490	592	0.82
comp80940_c0_seq2_13	605	ref|XP_010090263.1| Zeta-carotene desaturase [Morus notabilis]gb|EXB39201.1| Zeta-carotene desaturase [Morus notabilis]	581	1097	2837	0	538	581	0.92	561	581	0.96
comp7447_c0_seq1_13	284	ref|WP_017318302.1| photosystem reaction center subunit H [Mastigocladopsis repens]	307	312	799	1e-103	159	278	0.57	199	278	0.71	19	278	0.06
comp81543_c0_seq1_25	372	ref|XP_008226377.1| PREDICTED: probable LRR receptor-like serine/threonine-proteinkinase At1g53430 isoform X1 [Prunus mume]	996	425	1093	1e-138	229	372	0.61	270	372	0.72	8	372	0.02
comp38905_c0_seq1_7	416	ref|XP_010092426.1| Leucine-rich repeat extensin-like protein 6 [Morus notabilis]gb|EXB51144.1| Leucine-rich repeat extensin-like protein 6 [Morus notabilis]	427	511	1316	1e-178	247	330	0.74	277	330	0.83	1	330	0
comp58025_c0_seq1_4	194	ref|XP_010103679.1| hypothetical protein L484_011731 [Morus notabilis]gb|EXB96691.1| hypothetical protein L484_011731 [Morus notabilis]	173	213	541	6e-68	101	142	0.71	118	142	0.83	3	142	0.02
comp81064_c1_seq1_52	732	ref|XP_007211358.1| hypothetical protein PRUPE_ppa002050mg [Prunus persica]gb|EMJ12557.1| hypothetical protein PRUPE_ppa002050mg [Prunus persica]	724	972	2512	0	474	725	0.65	553	725	0.76	2	725	0
comp78347_c0_seq1_25	1148	ref|XP_010089636.1| LRR receptor-like serine/threonine-protein kinase RPK2 [Morusnotabilis]gb|EXB38107.1| LRR receptor-like serine/threonine-protein kinase RPK2 [Morusnotabilis]	1155	1710	4428	0	847	1109	0.76	931	1109	0.83	6	1109	0
comp63845_c0_seq1_30	668	ref|XP_010088853.1| Leucine-rich repeat extensin-like protein 4 [Morus notabilis]gb|EXB37050.1| Leucine-rich repeat extensin-like protein 4 [Morus notabilis]	777	672	1735	0	324	370	0.87	342	370	0.92
comp83613_c0_seq1_55	1033	ref|XP_003632548.1| PREDICTED: probable LRR receptor-like serine/threonine-protein kinaseAt1g06840 isoform X1 [Vitis vinifera]	949	1005	2598	0	542	983	0.55	663	983	0.67	35	983	0.03
comp27682_c0_seq1_15	190	ref|XP_008346349.1| PREDICTED: pathogenesis-related protein 1-like [Malus domestica]	161	253	646	5e-84	117	142	0.82	131	142	0.92
comp69528_c0_seq1_26	305	ref|XP_003634205.1| PREDICTED: uncharacterized protein LOC100853969 isoform X3 [Vitisvinifera]ref|XP_010663677.1| PREDICTED: uncharacterized protein LOC100853969 isoform X4 [Vitisvinifera]	291	444	1142	1e-155	215	291	0.73	235	291	0.8
comp73830_c0_seq1_37	887	ref|XP_010105101.1| Leucine-rich repeat receptor-like serine/threonine-protein kinaseBAM1 [Morus notabilis]gb|EXC03886.1| Leucine-rich repeat receptor-like serine/threonine-protein kinaseBAM1 [Morus notabilis]	1021	1281	3314	0	657	859	0.76	702	859	0.81	38	859	0.04
comp81183_c0_seq4_28	358	ref|XP_010111401.1| Polygalacturonase inhibitor [Morus notabilis]gb|EXC30879.1| Polygalacturonase inhibitor [Morus notabilis]	333	454	1167	1e-158	228	327	0.69	262	327	0.8	3	327	0
comp805202_c0_seq1_10	247	ref|WP_017314613.1| DNA nickase [Mastigocladopsis repens]	348	402	1032	1e-139	190	235	0.8	206	235	0.87
comp77844_c0_seq1_37	560	ref|XP_010086967.1| CBS domain-containing protein [Morus notabilis]gb|EXB25246.1| CBS domain-containing protein [Morus notabilis]	543	836	2159	0	424	549	0.77	449	549	0.81	8	549	0.01
comp77452_c0_seq3_68	901	ref|XP_004294067.1| PREDICTED: probable LRR receptor-like serine/threonine-proteinkinase At1g53430-like [Fragaria vesca subsp. vesca]	1016	1122	2902	0	572	892	0.64	684	892	0.76	13	892	0.01
comp87390_c0_seq1_16	639	ref|XP_010095584.1| Probably inactive leucine-rich repeat receptor-like protein kinase[Morus notabilis]gb|EXB61157.1| Probably inactive leucine-rich repeat receptor-like protein kinase[Morus notabilis]	602	968	2503	0	467	622	0.75	525	622	0.84	24	622	0.03
comp76653_c1_seq1_12	266	gb|AIJ04690.1| 14-3-3a [Morus alba var. atropurpurea]	262	513	1321	0	252	257	0.98	256	257	0.99
comp73467_c0_seq1_11	295	ref|XP_010094154.1| putative protein phosphatase 2C 10 [Morus notabilis]gb|EXB55287.1| putative protein phosphatase 2C 10 [Morus notabilis]	283	506	1304	1e-180	243	283	0.85	259	283	0.91
comp85163_c0_seq3_69	615	ref|XP_010093040.1| putative LRR receptor-like serine/threonine-protein kinase [Morusnotabilis]gb|EXB53368.1| putative LRR receptor-like serine/threonine-protein kinase [Morusnotabilis]	1105	952	2460	0	466	646	0.72	528	646	0.81	36	646	0.05
comp81516_c0_seq1_88	996	ref|XP_010113026.1| putative leucine-rich repeat receptor-like protein kinase [Morusnotabilis]gb|EXC35197.1| putative leucine-rich repeat receptor-like protein kinase [Morusnotabilis]	964	1493	3864	0	732	968	0.75	831	968	0.85	8	968	0
comp74828_c0_seq1_22	296	ref|XP_010106184.1| hypothetical protein L484_009608 [Morus notabilis]gb|EXC08465.1| hypothetical protein L484_009608 [Morus notabilis]	323	474	1219	1e-167	232	280	0.82	244	280	0.87
comp78347_c0_seq1_25	1148	ref|XP_010089636.1| LRR receptor-like serine/threonine-protein kinase RPK2 [Morusnotabilis]gb|EXB38107.1| LRR receptor-like serine/threonine-protein kinase RPK2 [Morusnotabilis]	1155	1710	4428	0	847	1109	0.76	931	1109	0.83	6	1109	0
comp30171_c0_seq1_75	633	ref|XP_001755358.1| predicted protein [Physcomitrella patens]gb|EDQ79838.1| predicted protein [Physcomitrella patens]	582	512	1318	1e-173	274	572	0.47	354	572	0.61	31	572	0.05
comp64684_c0_seq1_8	241	ref|XP_003616096.1| Cbs domain protein [Medicago truncatula]	242	366	940	1e-127	177	213	0.83	192	213	0.9	1	213	0
comp83339_c0_seq1_71	1288	ref|XP_010089232.1| Serine/threonine-protein kinase [Morus notabilis]gb|EXB37530.1| Serine/threonine-protein kinase [Morus notabilis]	1232	1614	4179	0	848	1291	0.65	951	1291	0.73	75	1291	0.05
comp83613_c0_seq1_55	1033	ref|XP_003632548.1| PREDICTED: probable LRR receptor-like serine/threonine-protein kinaseAt1g06840 isoform X1 [Vitis vinifera]	949	1005	2598	0	542	983	0.55	663	983	0.67	35	983	0.03
comp27703_c0_seq1_9	284	ref|XP_010097082.1| Serine/threonine protein phosphatase 2A 55 kDa regulatory subunit Bbeta isoform [Morus notabilis]gb|EXB66883.1| Serine/threonine protein phosphatase 2A 55 kDa regulatory subunit Bbeta isoform [Morus notabilis]	509	489	1258	1e-170	228	248	0.91	241	248	0.97	1	248	0
comp347627_c0_seq1_16	265	ref|XP_010314133.1| PREDICTED: cyclin-dependent kinase E-1 isoform X2 [Solanumlycopersicum]	456	323	828	1e-106	152	233	0.65	180	233	0.77
comp79610_c0_seq1_64	1018	ref|XP_007015657.1| BRI1 suppressor 1 (BSU1)-like 2 isoform 1 [Theobroma cacao]ref|XP_007015658.1| BRI1 suppressor 1 (BSU1)-like 2 isoform 1 [Theobroma cacao]ref|XP_007015659.1| BRI1 suppressor 1 (BSU1)-like 2 isoform 1 [Theobroma cacao]gb|EOY33276.1| BRI1 suppressor 1 (BSU1)-like 2 isoform 1 [Theobroma cacao]gb|EOY33277.1| BRI1 suppressor 1 (BSU1)-like 2 isoform 1 [Theobroma cacao]gb|EOY33278.1|…	1019	1625	4207	0	827	1023	0.8	844	1023	0.82	11	1023	0.01
comp42763_c0_seq1_6	156	ref|XP_006678916.1| calmodulin [Batrachochytrium dendrobatidis JAM81]gb|EGF80478.1| calmodulin [Batrachochytrium dendrobatidis JAM81]	169	274	700	8e-93	136	148	0.91	144	148	0.97
comp73830_c0_seq1_37	887	ref|XP_010105101.1| Leucine-rich repeat receptor-like serine/threonine-protein kinaseBAM1 [Morus notabilis]gb|EXC03886.1| Leucine-rich repeat receptor-like serine/threonine-protein kinaseBAM1 [Morus notabilis]	1021	1281	3314	0	657	859	0.76	702	859	0.81	38	859	0.04
comp81318_c0_seq2_10	566	ref|XP_010091811.1| Cysteine-rich receptor-like protein kinase 3 [Morus notabilis]gb|EXB46019.1| Cysteine-rich receptor-like protein kinase 3 [Morus notabilis]	641	870	2248	0	420	537	0.78	464	537	0.86	2	537	0
comp58441_c0_seq1_53	973	ref|XP_010110893.1| Coatomer subunit beta-1 [Morus notabilis]gb|EXC28846.1| Coatomer subunit beta-1 [Morus notabilis]	952	1731	4482	0	835	952	0.87	873	952	0.91
comp85822_c1_seq1_16	484	ref|XP_008371779.1| PREDICTED: endoplasmic reticulum oxidoreductin-1-like [Malusdomestica]	476	764	1973	0	362	478	0.75	405	478	0.84	2	478	0
comp84804_c0_seq2_42	725	ref|XP_010102639.1| hypothetical protein L484_010931 [Morus notabilis]gb|EXB93789.1| hypothetical protein L484_010931 [Morus notabilis]	714	1092	2823	0	531	719	0.73	594	719	0.82	9	719	0.01
comp63067_c0_seq1_21	225	ref|XP_010092659.1| Putative vesicle-associated membrane protein 726 [Morus notabilis]gb|EXB51910.1| Putative vesicle-associated membrane protein 726 [Morus notabilis]	221	402	1033	1e-141	190	221	0.85	199	221	0.9
comp27805_c0_seq1_45	773	ref|XP_010088856.1| putative ADP-ribosylation factor GTPase-activating protein AGD14[Morus notabilis]gb|EXB37053.1| putative ADP-ribosylation factor GTPase-activating protein AGD14[Morus notabilis]	767	805	2080	0	471	771	0.61	512	771	0.66	59	771	0.07
comp71920_c0_seq1_20	903	ref|XP_010086835.1| hypothetical protein L484_006064 [Morus notabilis]gb|EXB24033.1| hypothetical protein L484_006064 [Morus notabilis]	891	1525	3948	0	754	892	0.84	798	892	0.89	1	892	0
comp84829_c0_seq1_63	1135	ref|XP_010112639.1| hypothetical protein L484_019091 [Morus notabilis]gb|EXC34494.1| hypothetical protein L484_019091 [Morus notabilis]	1119	1910	4947	0	929	1081	0.85	963	1081	0.89
comp83513_c0_seq1_53	999	ref|XP_008224754.1| PREDICTED: ABC transporter A family member 2-like [Prunus mume]	957	1482	3837	0	718	961	0.74	799	961	0.83	11	961	0.01
comp85771_c0_seq2_35	1440	ref|XP_010093208.1| Pleiotropic drug resistance protein 2 [Morus notabilis]gb|EXB53706.1| Pleiotropic drug resistance protein 2 [Morus notabilis]	1538	2507	6498	0	1216	1452	0.83	1291	1452	0.88	19	1452	0.01
comp85771_c0_seq2_35	1440	ref|XP_010093208.1| Pleiotropic drug resistance protein 2 [Morus notabilis]gb|EXB53706.1| Pleiotropic drug resistance protein 2 [Morus notabilis]	1538	2507	6498	0	1216	1452	0.83	1291	1452	0.88	19	1452	0.01
comp79621_c0_seq3_29	489	ref|XP_006421924.1| hypothetical protein CICLE_v10004755mg [Citrus clementina]gb|ESR35164.1| hypothetical protein CICLE_v10004755mg [Citrus clementina]	514	863	2231	0	401	431	0.93	415	431	0.96
comp75494_c0_seq1_11	493	gb|AHY02156.1| ultraviolet-B receptor UVR8 [Betula platyphylla]	441	747	1928	0	360	443	0.81	390	443	0.88	2	443	0
comp82035_c0_seq1_35	379	ref|XP_004981971.1| PREDICTED: actin-1-like isoform X2 [Setaria italica]	382	778	2010	0	372	378	0.98	377	378	0.99
comp56339_c0_seq1_3	257	dbj|BAN13564.1| actin, partial [Chrysanthemum seticuspe f. boreale]	280	531	1369	0	256	257	0.99	257	257	1
comp53934_c0_seq1_4	89	dbj|BAJ16350.1| actin 2 [Papaver somniferum]	167	182	463	7e-58	89	89	1	89	89	1
comp7125_c0_seq1_8	144	emb|CCC46467.1| putative alpha tubulin, fragment, partial [Trypanosoma vivax Y486]	263	266	679	2e-88	124	127	0.97	124	127	0.97
comp42763_c0_seq1_6	156	ref|XP_006678916.1| calmodulin [Batrachochytrium dendrobatidis JAM81]gb|EGF80478.1| calmodulin [Batrachochytrium dendrobatidis JAM81]	169	274	700	8e-93	136	148	0.91	144	148	0.97
comp80235_c0_seq1_17	620	ref|XP_010087698.1| Myosin-J heavy chain [Morus notabilis]gb|EXB29686.1| Myosin-J heavy chain [Morus notabilis]	1544	1127	2915	0	529	598	0.88	558	598	0.93
