# Supplementary material for: Isobaric Tags for Relative and Absolute Quantitation (iTRAQ)-Based Comparative Proteome Analysis of the Response of Ramie under Drought Stress
Source: Int J Mol Sci. 2016 Sep 27;17(10):1607. doi: 10.3390/ijms17101607 (PMC5085640; doi:10.3390/ijms17101607)
Supplement: Supplementary file 1 [file ijms-17-01607-s001.zip › ijms-134229-Supplementary Materials/Table S3.xlsx]

## Sheet: Sheet1
Accession	L2/L1	L3/L1	Description
gi|257712882	2.56115	3.37778	unnamed protein product [Linum usitatissimum]
gi|255625927	2.4487	3.0124	unknown [Glycine max]
gi|78096543	2.73007	3.70528	putative vacuolar defense protein [Triticum aestivum]
gi|197305612	2.22807	3.21578	alpha-expansin [Pseudotsuga menziesii]
gi|255543963	1.79739	2.41475	Aspartic proteinase nepenthesin-1 precursor, putative [Ricinus communis]
gi|222624328	1.97804	2.58153	hypothetical protein OsJ_09701 [Oryza sativa Japonica Group]
gi|25811925	1.78009	2.30571	unnamed protein product [Zea mays]
gi|401414	1.68962	2.49098	RecName: Full=Wound-induced protein
gi|242088009	1.64336	2.09839	hypothetical protein SORBIDRAFT_09g020970 [Sorghum bicolor]
gi|297746435	1.60633	2.04306	unnamed protein product [Vitis vinifera]
gi|255638437	0.648873	0.362354	unknown [Glycine max]
gi|255540021	0.63494	0.388	carbonyl reductase, putative [Ricinus communis]
gi|298541583	0.653378	0.353877	unnamed protein product [Populus tremuloides]
gi|118489712	0.63394	0.359366	unknown [Populus trichocarpa x Populus deltoides]
gi|255631107	0.603251	0.372191	unknown [Glycine max]
gi|222834544	0.651566	0.420756	predicted protein [Populus trichocarpa]
gi|297801396	0.663033	0.33011	6-phosphogluconate dehydrogenase family protein [Arabidopsis lyrata subsp. lyrata]
gi|117662023	0.660011	0.439071	monodehydroascorbate reductase [Cucumis sativus]
gi|222859367	0.657465	0.434986	predicted protein [Populus trichocarpa]
gi|157165901	0.615646	0.404909	ATP synthase alpha subunit [Boehmeria nivea]
gi|222844475	0.644305	0.353742	predicted protein [Populus trichocarpa]
gi|255575683	0.661907	0.38675	Cell division protein ftsZ, putative [Ricinus communis]
gi|296090268	0.660815	0.425239	unnamed protein product [Vitis vinifera]
gi|168031643	0.657584	0.352874	predicted protein [Physcomitrella patens subsp. patens]
gi|297790552	0.657371	0.460775	hypothetical protein ARALYDRAFT_497076 [Arabidopsis lyrata subsp. lyrata]
gi|218188155	0.655386	0.406541	hypothetical protein OsI_01785 [Oryza sativa Indica Group]
gi|255571945	0.617691	0.30636	glutamate synthase, putative [Ricinus communis]
gi|296089875	0.609986	0.28645	unnamed protein product [Vitis vinifera]
gi|255569265	0.661947	0.41926	50S ribosomal protein L4, putative [Ricinus communis]
gi|241865475	0.64357	0.351222	NADH dehydrogenase [Sonneratia alba]
gi|302801664	0.612752	0.400041	hypothetical protein SELMODRAFT_116934 [Selaginella moellendorffii]
gi|296084957	0.652254	0.35478	unnamed protein product [Vitis vinifera]
gi|17046459	0.650915	0.407775	sucrose-phosphate synthase [Ipomoea batatas]
gi|222858015	0.647193	0.349686	predicted protein [Populus trichocarpa]
gi|291047598	0.629797	0.340847	unnamed protein product [Vitis pseudoreticulata]
gi|242097138	0.623884	0.294466	hypothetical protein SORBIDRAFT_10g030776 [Sorghum bicolor]
gi|223635791	0.647102	0.302783	RecName: Full=Transaldolase
gi|41367036	0.616352	0.413571	vacuolar H+-inorganic pyrophosphatse [Saccharum hybrid cultivar NCo 376]
gi|122166820	0.617706	0.27619	RecName: Full=ATP synthase subunit alpha, chloroplastic; AltName: Full=ATP synthase F1 sector subunit alpha; AltName: Full=F-ATPase subunit alpha
gi|12585296	0.63957	0.433101	RecName: Full=Phosphoglucomutase, cytoplasmic; Short=PGM; AltName: Full=Glucose phosphomutase
gi|297728737	0.652869	0.449585	Os11g0696150 [Oryza sativa Japonica Group]
gi|126022831	0.650521	0.360949	nitrite reductase [Cucumis sativus]
gi|300643494	0.613517	0.407181	unnamed protein product [Arabidopsis thaliana]
gi|118486677	0.634866	0.392793	unnamed protein product [Arabidopsis thaliana]
gi|297735045	0.616045	0.274656	unknown [Populus trichocarpa]
gi|302760535	0.615045	0.300837	unnamed protein product [Vitis vinifera]
gi|297738788	0.634721	0.362434	hypothetical protein SELMODRAFT_165987 [Selaginella moellendorffii]
gi|257720004	0.632023	0.316452	unnamed protein product [Vitis vinifera]
gi|211906528	0.600932	0.30269	unnamed protein product [Glycine max]
gi|190151606	0.592687	0.34572	alpha-1,4 glucan phosphorylase [Gossypium hirsutum]
gi|6635336	0.637759	0.361098	alanine:glyoxylate aminotransferase [Vigna radiata]
gi|302787967	0.610684	0.349795	hypothetical protein SELMODRAFT_104038 [Selaginella moellendorffii]
gi|39932663	0.606268	0.315982	Unknown protein from spot 146 of 2D-PAGE of etiolated coleoptile
gi|229002575	0.653565	0.387391	lipoxygenase [Actinidia arguta]
gi|13877587	0.626692	0.347036	2-oxoglutarate/malate translocator precursor-like protein [Arabidopsis thaliana]
gi|115304532	0.596225	0.424655	CYP74C4 protein [Solanum lycopersicum]
gi|73658469	0.630981	0.300111	PSII reaction center subunit V [Arabidopsis thaliana]
gi|296784038	0.63398	0.341628	glyceraldehyde-3-phosphate dehydrogenase [Vicia sativa]
gi|227307922	0.640013	0.320823	unnamed protein product [Brassica napus]
gi|115466224	0.583831	0.270194	Os06g0133800 [Oryza sativa Japonica Group]
gi|217075356	0.630221	0.356439	unknown [Medicago truncatula]
gi|255634883	0.641206	0.332319	unknown [Glycine max]
gi|224159	0.636581	0.24562	cytochrome b559
gi|126633022	0.63157	0.319967	unnamed protein product [Zea mays]
gi|168414974	0.625023	0.329925	harpin binding protein [Arachis diogoi]
gi|222424842	0.622373	0.32078	AT4G33030 [Arabidopsis thaliana]
gi|255671803	0.641658	0.327729	dihydroxyacid dehydratase [Glycine max]
gi|118175929	0.631556	0.309079	chloroplast sedoheptulose-1,7-bisphosphatase [Morus alba var. multicaulis]
gi|225464997	0.590679	0.344028	PREDICTED: hypothetical protein isoform 2 [Vitis vinifera]
gi|23197684	0.631056	0.39407	unknown protein [Arabidopsis thaliana]
gi|262400743	0.626915	0.322919	photosystem II 47 kDa protein [Brassica napus]
gi|313183807	0.615842	0.272039	ATP synthase CF1 alpha subunit [Prunus persica]
gi|126363763	0.587628	0.28797	ADP-glucose pyrophosphorylase beta subunit IbAGPb2 [Ipomoea batatas]
gi|225457947	0.634602	0.402332	PREDICTED: hypothetical protein [Vitis vinifera]
gi|6017812	0.618082	0.273535	ATP synthase beta subunit [Myrothamnus flabellifolia]
gi|297737663	0.633718	0.375176	unnamed protein product [Vitis vinifera]
gi|3850621	0.646501	0.325434	putative RNA binding protein [Arabidopsis thaliana]
gi|2623246	0.621523	0.420421	poly(A) polymerase [Pisum sativum]
gi|194703834	0.631898	0.301913	unknown [Zea mays]
gi|222867296	0.609265	0.290385	predicted protein [Populus trichocarpa]
gi|222858889	0.646396	0.456681	predicted protein [Populus trichocarpa]
gi|3914606	0.619559	0.308228	RecName: Full=Ribulose bisphosphate carboxylase small chain, chloroplastic; Short=RuBisCO small subunit; Flags: Precursor
gi|110740563	0.587518	0.357428	glycyl-tRNA synthetase [Arabidopsis thaliana]
gi|298552499	0.615882	0.339155	unnamed protein product [Sorghum bicolor]
gi|222855217	0.638188	0.377429	predicted protein [Populus trichocarpa]
gi|222840887	0.616333	0.302639	predicted protein [Populus trichocarpa]
gi|552956	0.634654	0.4326	ATPase subunit I [Nicotiana tabacum]
gi|71842522	0.597367	0.380727	AlaT1 [Vitis labrusca]
gi|162462751	0.601508	0.353603	ATP synthase subunit beta, mitochondrial precursor [Zea mays]
gi|182407848	0.636188	0.377494	20S proteasome alpha subunit A1 [Malus x domestica]
gi|17939851	0.58033	0.294121	mitochondrial F0 ATP synthase D chain [Arabidopsis thaliana]
gi|94549022	0.616415	0.611474	ribulose-1,5-bisphosphate carboxylase/oxygenase activase [Pachysandra terminalis]
gi|300634259	0.583715	0.241433	unnamed protein product [Phaseolus vulgaris]
gi|109157231	0.573063	0.232832	Chain C, Pea Light-Harvesting Complex Ii At 2.5 Angstrom Resolution
gi|255582572	0.60012	0.35034	mitochondrial oxoglutarate/malate carrier protein, putative [Ricinus communis]
gi|298204900	0.598661	0.365273	unnamed protein product [Vitis vinifera]
gi|222856419	0.561019	0.243481	predicted protein [Populus trichocarpa]
gi|222852205	0.622871	0.402114	predicted protein [Populus trichocarpa]
gi|217944	0.501883	0.218027	light-harvesting chlorophyll a/b-binding protein (LHCP) precursor [Lactuca sativa]
gi|257626367	0.605783	0.380424	unnamed protein product [Helianthus annuus]
gi|124359737	0.618939	0.380308	Signal peptide binding (SRP54) M-domain [Medicago truncatula]
gi|27762607	0.579519	0.30124	iron superoxide dismutase [Capsicum annuum]
gi|225444525	0.596625	0.299265	PREDICTED: hypothetical protein isoform 1 [Vitis vinifera]
gi|32328724	0.583291	0.354448	magnesium chelatase subunit [Nicotiana benthamiana]
gi|302141701	0.550457	0.177453	unnamed protein product [Vitis vinifera]
gi|296087158	0.593023	0.298114	unnamed protein product [Vitis vinifera]
gi|222859262	0.51048	0.240283	predicted protein [Populus trichocarpa]
gi|222860268	0.545519	0.245173	predicted protein [Populus trichocarpa]
gi|225637964	0.556855	0.222293	granule-bound starch synthase I [Elymus repens]
gi|255570589	0.575765	0.362548	Thylakoid lumenal 17.4 kDa protein, chloroplast precursor, putative [Ricinus communis]
gi|13096169	0.564964	0.3068	Chain B, Crystal Structure Analysis Of The Ferredoxin-Nadp+ Reductase From Maize Leaf
gi|242082021	0.577382	0.297807	hypothetical protein SORBIDRAFT_07g025680 [Sorghum bicolor]
gi|86450874	0.541323	0.30092	plastid fibrillin 2 [Coffea canephora]
gi|222618650	0.58275	0.351037	hypothetical protein OsJ_02179 [Oryza sativa Japonica Group]
gi|126363757	0.52924	0.225651	ADP-glucose pyrophosphorylase alpha subunit IbAGPa2 [Ipomoea batatas]
gi|297736099	0.525741	0.419516	unnamed protein product [Vitis vinifera]
gi|49175787	0.547581	0.324966	26S proteasome ATPase subunit [Pisum sativum]
