# Supplementary material for: Isobaric Tags for Relative and Absolute Quantitation (iTRAQ)-Based Comparative Proteome Analysis of the Response of Ramie under Drought Stress
Source: Int J Mol Sci. 2016 Sep 27;17(10):1607. doi: 10.3390/ijms17101607 (PMC5085640; doi:10.3390/ijms17101607)
Supplement: Supplementary file 1 [file ijms-17-01607-s001.zip › ijms-134229-Supplementary Materials/Table S4.xlsx]

## Sheet: Sheet1
Accession	R2/R1	R3/R1	Description
gi|222833148	4.95544	9.0239	predicted protein [Populus trichocarpa]
gi|2641346	4.47944	8.46667	alcohol dehydrogenase [Pyrus communis]
gi|21360782	5.18617	9.68135	ribulose-1,5-bisphosphate carboxylase/oxygenase large subunit [Abies bracteata]
gi|226507186	4.05417	7.12671	hypothetical protein LOC100272913 [Zea mays]
gi|190613887	3.75321	6.34255	putative allergen Pru du 1.05 [Prunus dulcis x Prunus persica]
gi|302782229	3.77978	6.42108	hypothetical protein SELMODRAFT_172992 [Selaginella moellendorffii]
gi|296523718	3.93306	6.79875	unnamed protein product [Glycine max]
gi|125552186	3.33042	5.36595	hypothetical protein OsI_19813 [Oryza sativa Indica Group]
gi|168007855	3.37751	5.50124	predicted protein [Physcomitrella patens subsp. patens]
gi|224338	3.5655	5.96009	hemoglobin I
gi|113363	3.82785	7.41075	RecName: Full=Alcohol dehydrogenase 1
gi|226531187	3.32039	5.89778	hypothetical protein LOC100274207 [Zea mays]
gi|307683431	3.96252	6.97947	photosystem I P700 apoprotein A1 [Pseudotsuga sinensis var. wilsoniana]
gi|296040743	3.22999	5.57343	NADH dehydrogenase subunit 7 [Silene conica]
gi|124359402	3.27455	5.35714	Aldehyde dehydrogenase [Medicago truncatula]
gi|225457674	2.99258	5.11567	PREDICTED: similar to Pyrophosphate--fructose 6-phosphate 1-phosphotransferase subunit alpha [Vitis vinifera]
gi|224126451	3.04112	4.95295	hypothetical protein POPTRDRAFT_783792 [Populus trichocarpa]
gi|4204861	2.77303	4.27162	heat shock protein 90 [Triticum aestivum]
gi|296082285	2.66957	4.17462	unnamed protein product [Vitis vinifera]
gi|168012925	2.75123	4.67949	predicted protein [Physcomitrella patens subsp. patens]
gi|297742667	2.5592	3.99079	unnamed protein product [Vitis vinifera]
gi|225428853	2.54309	4.51296	PREDICTED: hypothetical protein [Vitis vinifera]
gi|306416861	2.79229	4.64052	alcohol dehydrogenase 1 [Spinacia oleracea]
gi|115463181	2.499	4.367	Os05g0320700 [Oryza sativa Japonica Group]
gi|168069345	2.65707	3.74336	predicted protein [Physcomitrella patens subsp. patens]
gi|166928	2.49209	3.8545	unnamed protein product [Arabidopsis thaliana]
gi|25990360	2.64253	4.51675	sucrose synthase [Phaseolus vulgaris]
gi|74273623	2.38109	3.56836	brassinosteroid biosynthetic protein DWARF1 [Gossypium hirsutum]
gi|222839154	2.573	4.25765	predicted protein [Populus trichocarpa]
gi|168037018	2.38591	3.85753	predicted protein [Physcomitrella patens subsp. patens]
gi|118485031	2.09568	3.07426	unknown [Populus trichocarpa]
gi|217071056	2.23302	3.2035	unknown [Medicago truncatula]
gi|148909628	2.06278	3.18363	unknown [Picea sitchensis]
gi|241865406	2.25602	3.78185	ribosomal protein S18 [Sonneratia alba]
gi|78210838	2.40273	3.8887	beta tubulin like protein [Pyrus pyrifolia var. culta]
gi|124360646	2.16831	3.62171	Mitochondrial import inner membrane translocase, subunit Tim17/22 [Medicago truncatula]
gi|302759186	2.1469	2.98504	hypothetical protein SELMODRAFT_79178 [Selaginella moellendorffii]
gi|129560450	2.10083	3.18234	hypothetical protein [Marchantia polymorpha]
gi|225450619	2.1021	2.61	PREDICTED: hypothetical protein [Vitis vinifera]
gi|255554865	2.23843	3.61882	lactoylglutathione lyase, putative [Ricinus communis]
gi|222869473	2.24553	3.42078	predicted protein [Populus trichocarpa]
gi|297820562	2.06313	3.06909	adenylosuccinate synthetase [Arabidopsis lyrata subsp. lyrata]
gi|297795483	2.35921	3.83928	hypothetical protein ARALYDRAFT_917723 [Arabidopsis lyrata subsp. lyrata]
gi|257689825	2.09359	3.44136	unnamed protein product [Zea mays]
gi|23197868	1.95943	2.95051	unknown protein [Arabidopsis thaliana]
gi|255557048	2.07244	3.07356	Peroxidase 21 precursor, putative [Ricinus communis]
gi|298204799	1.97931	2.74551	unnamed protein product [Vitis vinifera]
gi|148807154	2.17943	3.4252	putative 40S ribosomal protein [Prunus dulcis]
gi|295311634	1.93815	3.03954	ATPase subunit 4 [Citrullus lanatus]
gi|7649161	2.00157	3.00751	cyclophilin [Euphorbia esula]
gi|126022831	1.92889	2.76798	nitrite reductase [Cucumis sativus]
gi|75333114	2.16231	3.34582	RecName: Full=Coatomer subunit alpha-2; AltName: Full=Alpha-coat protein 2; Short=Alpha-COP 2
gi|222861777	2.05687	3.06863	predicted protein [Populus trichocarpa]
gi|18203445	1.94087	2.9029	RecName: Full=60S ribosomal protein L10; AltName: Full=QM protein homolog
gi|224031309	2.07719	3.57775	unknown [Zea mays]
gi|222845119	1.90489	2.2852	predicted protein [Populus trichocarpa]
gi|15723719	2.44029	2.48011	ATP synthase beta subunit [Trichodiadema barbatum]
gi|1351138	2.13993	3.14301	RecName: Full=Sucrose synthase; AltName: Full=Sucrose-UDP glucosyltransferase
gi|297734128	1.97896	2.56476	unnamed protein product [Vitis vinifera]
gi|225455175	1.9811	2.89023	PREDICTED: hypothetical protein [Vitis vinifera]
gi|255644850	1.99971	3.10817	unknown [Glycine max]
gi|259506726	1.89622	2.68373	phosphoenolpyruvate carboxylase [Citrus sinensis]
gi|302143374	2.12063	2.8769	unnamed protein product [Vitis vinifera]
gi|255549601	1.98225	2.98421	5-methyltetrahydropteroyltriglutamate--homocysteine methyltransferase, putative [Ricinus communis]
gi|257632957	1.98143	3.02143	unnamed protein product [Glycine max]
gi|255545339	2.03226	2.93206	bsu-protein phosphatase, putative [Ricinus communis]
gi|255627457	1.86537	2.7377	unknown [Glycine max]
gi|37574474	1.82097	2.89495	ribulose 1,5-bisphosphate carboxylase/oxygenase [Pogonatum neesii]
gi|15224406	1.79936	2.6434	ligase, putative [Arabidopsis thaliana]
gi|255540953	1.93378	2.75354	abc transporter, putative [Ricinus communis]
gi|222853009	1.97718	2.96346	predicted protein [Populus trichocarpa]
gi|297742929	1.92517	2.77842	unnamed protein product [Vitis vinifera]
gi|300636279	1.7941	2.32991	unnamed protein product [Glycine max]
gi|223946033	1.84422	2.8428	unknown [Zea mays]
gi|255574808	1.86305	3.11284	clathrin heavy chain, putative [Ricinus communis]
gi|108706134	1.77797	2.75109	Chaperonin CPN60-1, mitochondrial precursor, putative, expressed [Oryza sativa Japonica Group]
gi|37725088	1.98019	2.6815	F1 ATP synthase beta subunit [Casuarina equisetifolia]
gi|255639747	2.00565	3.02065	unknown [Glycine max]
gi|302765048	1.85557	2.66091	hypothetical protein SELMODRAFT_407109 [Selaginella moellendorffii]
gi|7415646	1.78539	2.74551	anthocyanin acyltransferase [Perilla frutescens]
gi|298573438	1.87002	2.80299	protoporphyrin IX magnesium chelatase [Pteris vittata]
gi|12229807	1.84556	2.73256	RecName: Full=Glutamate dehydrogenase 1; Short=GDH 1
gi|227206436	1.80206	2.51113	AT3G62290 [Arabidopsis thaliana]
gi|222858686	1.86753	2.71059	predicted protein [Populus trichocarpa]
gi|218546726	1.77333	2.55233	RecName: Full=Peroxidase 8
gi|300557525	1.73682	2.50429	unnamed protein product [Panicum miliaceum]
gi|225434502	1.79925	2.89166	PREDICTED: hypothetical protein [Vitis vinifera]
gi|296087561	1.87843	2.84874	unnamed protein product [Vitis vinifera]
gi|297742010	1.72055	2.37065	unnamed protein product [Vitis vinifera]
gi|6706412	1.8246	2.47015	villin 3 fragment [Arabidopsis thaliana]
gi|50659630	1.7317	2.57342	60S ribosomal protein L23 [Arabidopsis thaliana]
gi|41350265	1.73366	2.35495	acid isoperoxidase [Brassica napus]
gi|113461	1.82369	2.70012	RecName: Full=ADP,ATP carrier protein, mitochondrial; AltName: Full=ADP/ATP translocase; AltName: Full=Adenine nucleotide translocator; Short=ANT; Flags: Precursor
gi|168034003	1.79829	2.56329	predicted protein [Physcomitrella patens subsp. patens]
gi|255626239	1.70088	2.05869	unknown [Glycine max]
gi|255632490	2.04865	2.66085	unknown [Glycine max]
gi|255641292	1.73315	2.59405	unknown [Glycine max]
gi|257307287	1.86662	2.92745	unnamed protein product [Cucumis sativus]
gi|257683118	1.70425	2.31523	unnamed protein product [Glycine max]
gi|297736606	1.74845	2.61015	unnamed protein product [Vitis vinifera]
gi|63003222	2.06255	2.22865	CAB homologue1 [Lemna paucicostata]
gi|222852135	1.66379	2.21025	predicted protein [Populus trichocarpa]
gi|131135	1.66703	2.36635	RecName: Full=Photosystem I P700 chlorophyll a apoprotein A1; Short=PSI-A; Short=PsaA
gi|257310596	1.6791	2.30422	unnamed protein product [Glycine max]
gi|2494844	1.78486	2.68101	RecName: Full=Lactoylglutathione lyase; AltName: Full=Aldoketomutase; AltName: Full=Glyoxalase I; Short=Glx I; AltName: Full=Ketone-aldehyde mutase; AltName: Full=Methylglyoxalase; AltName: Full=S-D-lactoylglutathione methylglyoxal lyase
gi|1352830	1.67003	2.64016	RecName: Full=V-type proton ATPase catalytic subunit A; Short=V-ATPase subunit A; AltName: Full=V-ATPase 69 kDa subunit; AltName: Full=Vacuolar proton pump subunit alpha
gi|75140229	1.63315	2.53763	RecName: Full=Transketolase, chloroplastic; Short=TK
gi|298204856	1.62165	2.19249	unnamed protein product [Vitis vinifera]
gi|147782992	1.75267	2.51153	hypothetical protein VITISV_032173 [Vitis vinifera]
gi|1173256	1.67016	2.28382	RecName: Full=40S ribosomal protein S4
gi|8134569	1.82447	2.6217	RecName: Full=5-methyltetrahydropteroyltriglutamate--homocysteine methyltransferase; AltName: Full=Cobalamin-independent methionine synthase isozyme; AltName: Full=Vitamin-B12-independent methionine synthase isozyme
gi|225432854	1.58688	2.28282	PREDICTED: hypothetical protein [Vitis vinifera]
gi|192910862	1.66284	2.20673	ubiquitin-conjugating enzyme family protein [Elaeis guineensis]
gi|225464301	1.61041	2.28482	PREDICTED: hypothetical protein [Vitis vinifera]
gi|197305612	1.64772	2.09225	alpha-expansin [Pseudotsuga menziesii]
gi|302761828	1.62819	2.15045	hypothetical protein SELMODRAFT_80889 [Selaginella moellendorffii]
gi|153799772	1.70693	2.3677	cytochrome c oxidase subunit 2 [Arabidopsis thaliana]
gi|222841252	1.60952	2.06772	chalcone synthase [Populus trichocarpa]
gi|297742584	1.5722	2.3152	unnamed protein product [Vitis vinifera]
gi|196166898	1.58878	2.28827	cyclophilin [Ziziphus jujuba]
gi|222845755	1.55219	2.67424	predicted protein [Populus trichocarpa]
gi|299829978	1.61443	2.23729	ribosomal s6 RPS6-2 family protein [Musa maclayi]
gi|323148902	0.609543	0.352821	photosystem II CP43 chlorophyll apoprotein [Smilax china]
gi|899344	0.592692	0.438525	lipoxygenase [Nicotiana tabacum]
