# Supplementary material for: Isobaric Tags for Relative and Absolute Quantitation (iTRAQ)-Based Comparative Proteome Analysis of the Response of Ramie under Drought Stress
Source: Int J Mol Sci. 2016 Sep 27;17(10):1607. doi: 10.3390/ijms17101607 (PMC5085640; doi:10.3390/ijms17101607)
Supplement: Supplementary file 1 [file ijms-17-01607-s001.zip › ijms-134229-Supplementary Materials/Table S5.xlsx]

## Sheet: root
Accession	Protein	Transcript
comp58441_c0_seq1	0.621993	1.84267	GI:356521768	PREDICTED: coatomer subunit beta-1-like	[Glycine max]
comp73375_c0_seq1	-0.630394	1.95204	GI:297831440	predicted protein	[Arabidopsis lyrata subsp. lyrata]
comp84571_c0_seq2	0.900722	2.30002	GI:255569484	5-methyltetrahydropteroyltriglutamate--homocysteine methyltransferase, putative	[Ricinus communis]
comp54058_c0_seq1	-1.02621	3.79556	GI:63253782	lectin KM+	[Artocarpus heterophyllus]
comp80231_c0_seq1	-0.954557	-1.75301	GI:255570990	heat shock protein, putative	[Ricinus communis]
comp69405_c0_seq1	-1.17788	-1.66819	GI:224132004	predicted protein	[Populus trichocarpa]
comp80138_c0_seq1	1.03984	1.36832	GI:255574808	clathrin heavy chain, putative	[Ricinus communis]
comp76446_c0_seq1	0.662661	1.22638	GI:67867096	chitinase	[Ulmus pumila]
comp78941_c0_seq1	1.68975	-1.09392	GI:452769	alcohol dehydrogenase-1F	[Phaseolus acutifolius]
comp66569_c0_seq1	-1.14561	-1.30629	GI:255572511	Blue copper protein precursor, putative	[Ricinus communis]
comp77399_c0_seq5	-0.84944	1.81775	GI:159468053	low-CO2-inducible chloroplast envelope protein	[Chlamydomonas reinhardtii]
comp39277_c0_seq1	-1.88364	-1.11249	GI:224127848	light-harvesting complex II protein Lhcb5	[Populus trichocarpa]

## Sheet: leaf
Accession	Protein	Transcript
comp100621_c0_seq1	1.15251	4.43258	GI:255584904	Xylem serine proteinase 1 precursor, putative	[Ricinus communis]
comp72649_c0_seq3	1.40218	1.99502	GI:20150316	Chain A, Structure Of Artocarpin: A Lectin With Mannose Specificity (Form 1) pdb|1J4S|B Chain B, Structure Of Artocarpin: A Lectin With Mannose Specificity (Form 1) pdb|1J4S|C Chain C, Structure Of Artocarpin: A Lectin With Mannose Specificity (Form 1) pdb|1J4S|D Chain D, Structure Of Artocarpin: A Lectin With Mannose Specificity (Form 1)]
comp39370_c0_seq1	-1.02034	2.67968	GI:354464671	fructose 1,6 bisphosphate aldolase class 1	[Carica papaya]	KOG1557
comp86093_c0_seq1	1.32596	-5.74759	GI:344190188	class IV chitinase	[Corylus heterophylla]	KOG4742
comp61356_c0_seq1	1.24428	2.28168	GI:356526942	PREDICTED: oxygen-evolving enhancer protein 2, chloroplastic-like	[Glycine max]
comp72686_c0_seq1	-1.37333	1.89777	GI:359490718	PREDICTED: thylakoid lumenal 17.4 kDa protein, chloroplastic	[Vitis vinifera]
comp77887_c0_seq4	0.863938	3.50675	GI:356524289	PREDICTED: LOW QUALITY PROTEIN: aspartic proteinase nepenthesin-2-like	[Glycine max]	KOG1339
comp85102_c1_seq1	1.98659	-2.54783	GI:374719231	chitinase 2	[Populus x canadensis]
comp73554_c0_seq1	1.85479	2.00744	GI:307135855	LRR-family protein	[Cucumis melo subsp. melo]
comp60758_c0_seq1	0.838347	3.81036	GI:225426724	PREDICTED: PGR5-like protein 1A, chloroplastic-like	[Vitis vinifera]
comp85926_c0_seq1	-0.78339	4.53956	GI:74273314	VDRG6	[Gossypium hirsutum]
comp80184_c0_seq1	0.883621	-1.28178	GI:296084540	unnamed protein product	[Vitis vinifera]
comp85015_c0_seq1	0.967169	2.31279	GI:224099363	predicted protein	[Populus trichocarpa]	KOG1065
comp73866_c0_seq1	-1.08314	2.92033	GI:359492950	PREDICTED: 1,4-alpha-glucan-branching enzyme-like	[Vitis vinifera]	KOG0470
comp39433_c0_seq1	3.99829	-11.0414	GI:225637998	thaumatin-like protein	[Pyrus pyrifolia]
comp73375_c0_seq1	2.01221	-1.8632	GI:297831440	predicted protein	[Arabidopsis lyrata subsp. lyrata]
comp57307_c0_seq1	0.772308	1.05615	GI:297736951	unnamed protein product	[Vitis vinifera]	KOG0856
comp62175_c0_seq2	0.627607	1.9501	GI:255568540	Aspartic proteinase nepenthesin-2 precursor, putative	[Ricinus communis]	KOG1339
comp83131_c3_seq1	-0.818579	2.57369	GI:255541252	transketolase, putative	[Ricinus communis]	KOG0523
comp54058_c0_seq1	2.83188	3.045	GI:63253782	lectin KM+	[Artocarpus heterophyllus]
comp82189_c0_seq1	1.68482	-1.13266	GI:255538616	Glucan endo-1,3-beta-glucosidase precursor, putative	[Ricinus communis]
comp81491_c0_seq1	1.77695	-2.43967	GI:372477642	glutathione peroxidase	[Copaifera officinalis]
comp68764_c0_seq1	-0.701342	1.63414	GI:381393062	glyceraldehyde-3-phosphate dehydrogenase B	[Pyrus x bretschneideri]	KOG0657
comp81007_c0_seq2	1.84036	4.54516	GI:381393062	soluble acid invertase	[Pyrus pyrifolia]	KOG0228
comp81554_c0_seq2	0.773996	4.13004	GI:255539130	multicopper oxidase, putative	[Ricinus communis]	KOG1263
comp81710_c0_seq1	-0.706041	3.19802	GI:225441236	PREDICTED: ferredoxin-dependent glutamate synthase 1, chloroplastic	[Vitis vinifera]	KOG0399
comp75310_c0_seq1	-0.619271	2.49235	GI:118175929	chloroplast sedoheptulose-1,7-bisphosphatase	[Morus alba var. multicaulis]	KOG1458
comp71527_c0_seq1	-0.826233	1.64263	GI:358249276	uncharacterized protein LOC100803191	[Glycine max]
comp69405_c0_seq1	-0.924125	1.48585	GI:224132004	predicted protein	[Populus trichocarpa]	KOG0356
comp65910_c0_seq1	-0.813499	1.02047	GI:114804272	ATP synthase CF1 beta subunit	[Morus indica]	KOG1350
comp75288_c0_seq1	1.77104	3.65274	GI:225430200	PREDICTED: uncharacterized protein LOC100252479	[Vitis vinifera]
comp78773_c0_seq2	1.63691	-4.74232	GI:255549710	serine/threonine-specific receptor protein kinase, putative	[Ricinus communis]
comp87877_c0_seq1	-0.617056	1.12445	GI:224103129	predicted protein	[Populus trichocarpa]	KOG0776
comp79366_c0_seq1	-0.744197	3.53657	GI:224071429	predicted protein	[Populus trichocarpa]
comp76446_c0_seq1	1.14991	-1.2079	GI:67867096	chitinase	[Ulmus pumila]	KOG4742
comp78556_c0_seq2	1.73292	2.81193	GI:255576129	zinc finger protein, putative	[Ricinus communis]
comp80285_c0_seq1	0.595504	3.75938	GI:255578656	peptidyl-prolyl cis-trans isomerase, putative	[Ricinus communis]
comp66220_c0_seq1	-0.641604	-1.02538	GI:372000481	photosystem II protein CP43	[Didierea madagascariensis]
comp74090_c1_seq2	1.5656	1.417	GI:255565228	Cucumisin precursor, putative	[Ricinus communis]
comp77124_c0_seq3	-0.793357	3.01879	GI:225444525	PREDICTED: ATP synthase gamma chain, chloroplastic-like isoform 1	[Vitis vinifera]	KOG1531
comp79756_c0_seq1	0.762136	1.49814	GI:225432384	PREDICTED: uncharacterized protein LOC100251108	[Vitis vinifera]
comp82957_c0_seq2	-0.685014	1.64943	GI:2804572	chlorophyll a/b-binding protein	[Fagus crenata]
comp95557_c0_seq1	1.51046	2.27561	GI:255562874	ribonuclease t2, putative	[Ricinus communis]	KOG1642
comp66935_c0_seq1	1.21288	-1.26714	GI:388504402	unknown	[Lotus japonicus]	KOG0549
comp83978_c1_seq1	1.08542	2.44545	GI:255537327	Lignin-forming anionic peroxidase precursor, putative	[Ricinus communis]
comp39650_c0_seq2	-0.637109	3.46933	GI:224078341	predicted protein	[Populus trichocarpa]	KOG0069
comp56974_c0_seq1	2.57265	2.4489	GI:255553599	conserved hypothetical protein	[Ricinus communis]
comp57641_c0_seq1	1.29337	1.31017	GI:356558946	PREDICTED: subtilisin-like protease-like	[Glycine max]
comp81346_c0_seq2	0.822934	1.13636	GI:356561171	PREDICTED: lysosomal alpha-mannosidase-like isoform 1	[Glycine max]	KOG1959
comp71397_c0_seq2	-0.590745	2.67856	GI: 228861350	Phosphoglycerate kinase, chloroplastic; Flags: Precursor emb|CAA88841.1| phosphoglycerate kinase	[Nicotiana tabacum]	KOG1367
comp85943_c0_seq1	1.48852	-1.99242	GI:356563537	PREDICTED: peroxidase 73-like	[Glycine max]
comp88463_c0_seq1	0.662661	1.24726	GI:357467579	50S ribosomal protein L3	[Medicago truncatula]	KOG3141
comp78163_c0_seq2	-0.625934	1.439	GI:255564820	rubisco subunit binding-protein beta subunit, rubb, putative	[Ricinus communis]	KOG0356
comp85946_c0_seq1	-0.798366	1.60752	GI:182636944	granule bound starch synthase Ia precursor	[Malus x domestica]
comp85819_c0_seq1	1.87421	1.00572	GI:22034569	mannose-binding lectin	[Morus nigra]
comp81392_c0_seq1	0.609755	-2.14102	GI:255547385	malate dehydrogenase, putative	[Ricinus communis]	KOG1494
comp54150_c0_seq1	-0.880976	1.25836	GI:17026394	UDP-glucose pyrophosphorylase	[Amorpha fruticosa]	KOG2638
comp74026_c0_seq1	1.74588	-5.24374	GI:255567707	conserved hypothetical protein	[Ricinus communis]
comp66385_c0_seq1	1.12234	-1.11713	GI: 228861350	Endochitinase; Flags: Precursor gb|AAA33756.1| chitinase (EC 3.2.1.14)	[Phaseolus vulgaris]
comp77656_c0_seq1	0.740712	-3.67067	GI:408362889	cell wall invertase	[Malus x domestica]	KOG0228
comp86294_c0_seq1	1.61495	3.18351	GI:15221646	MLP-like protein 423	[Arabidopsis thaliana]
comp75494_c0_seq1	0.88049	3.30749	GI:225438373	PREDICTED: probable E3 ubiquitin-protein ligase HERC1	[Vitis vinifera]	KOG1427
comp74948_c0_seq1	-0.655172	1.86486	GI:255542956	NAD dependent epimerase/dehydratase, putative	[Ricinus communis]
comp79112_c0_seq1	2.86849	-2.25551	GI: 11055156	peroxidase	[Ficus carica]
comp62340_c0_seq1	-0.678072	3.0329	GI:255545402	Photosystem II 22 kDa protein, chloroplast precursor, putative	[Ricinus communis]
