# Supplementary material for: Isobaric Tags for Relative and Absolute Quantitation (iTRAQ)-Based Comparative Proteome Analysis of the Response of Ramie under Drought Stress
Source: Int J Mol Sci. 2016 Sep 27;17(10):1607. doi: 10.3390/ijms17101607 (PMC5085640; doi:10.3390/ijms17101607)
Supplement: Supplementary file 1 [file ijms-17-01607-s001.zip › ijms-134229-Supplementary Materials/Table S6.xlsx]

## Sheet: Sheet1
Number	Pathway	Pvalue
1	Metabolic pathways	0.00030517
2	Porphyrin and chlorophyll metabolism	0.0119038
3	Oxidative phosphorylation	0.0155955
4	Glycine, serine and threonine metabolism	0.0409598
5	Glycolysis / Gluconeogenesis	0.0410351
6	One carbon pool by folate	0.0569212
7	Carbon fixation in photosynthetic organisms	0.0751614
8	Arginine and proline metabolism	0.0902014
9	Ascorbate and aldarate metabolism	0.100825
10	Pentose phosphate pathway	0.106421
11	Linoleic acid metabolism	0.11216
12	Photosynthesis - antenna proteins	0.11216
13	Spliceosome	0.11216
14	RNA degradation	0.123431
15	Limonene and pinene degradation	0.132013
16	Biosynthesis of secondary metabolites	0.132585
17	Alanine, aspartate and glutamate metabolism	0.148914
19	Amino sugar and nucleotide sugar metabolism	0.153234
20	Photosynthesis	0.168319
21	Cyanoamino acid metabolism	0.209488
22	Peroxisome	0.244651
23	Phenylalanine, tyrosine and tryptophan biosynthesis	0.244651
24	Glycerolipid metabolism	0.244651
25	beta-Alanine metabolism	0.244651
26	Histidine metabolism	0.290429
27	mRNA surveillance pathway	0.290429
28	Nitrogen metabolism	0.299933
29	Fructose and mannose metabolism	0.299933
30	Starch and sucrose metabolism	0.301601
31	Glyoxylate and dicarboxylate metabolism	0.301601
32	Glutathione metabolism	0.306816
33	Galactose metabolism	0.306816
34	Taurine and hypotaurine metabolism	0.356604
35	Benzoxazinoid biosynthesis	0.356604
36	Aminoacyl-tRNA biosynthesis	0.36587
37	Pentose and glucuronate interconversions	0.407351
38	Phagosome	0.457285
39	Proteasome	0.520567
40	Lysine degradation	0.584973
41	ABC transporters	0.586475
42	Protein export	0.586475
43	Pyrimidine metabolism	0.586475
44	Steroid biosynthesis	0.586475
45	Lysine biosynthesis	0.586475
46	Purine metabolism	0.673314
47	Endocytosis	0.679768
48	Fatty acid metabolism	0.679768
49	Tryptophan metabolism	0.694525
50	Tropane, piperidine and pyridine alkaloid biosynthesis	0.734498
51	Pantothenate and CoA biosynthesis	0.734498
52	Terpenoid backbone biosynthesis	0.734498
53	Ribosome biogenesis in eukaryotes	0.734498
54	Isoquinoline alkaloid biosynthesis	0.734498
55	Sulfur metabolism	0.734498
56	alpha-Linolenic acid metabolism	0.754838
57	Pyruvate metabolism	0.768631
58	Tyrosine metabolism	0.779072
59	Plant-pathogen interaction	0.81511
60	Butanoate metabolism	0.829716
61	Glycerophospholipid metabolism	0.829716
62	Valine, leucine and isoleucine biosynthesis	0.829716
63	Propanoate metabolism	0.842442
64	Valine, leucine and isoleucine degradation	0.842442
65	Cysteine and methionine metabolism	0.862376
66	Stilbenoid, diarylheptanoid and gingerol biosynthesis	0.890902
67	Flavonoid biosynthesis	0.930177
68	RNA transport	0.946291
69	Protein processing in endoplasmic reticulum	0.946757
70	Ribosome	0.99654
71	Phenylpropanoid biosynthesis	0.998467
72	Phenylalanine metabolism	0.999521
73	Citrate cycle (TCA cycle)	0.999697
