# Supplementary material for: Isobaric Tags for Relative and Absolute Quantitation (iTRAQ)-Based Comparative Proteome Analysis of the Response of Ramie under Drought Stress
Source: Int J Mol Sci. 2016 Sep 27;17(10):1607. doi: 10.3390/ijms17101607 (PMC5085640; doi:10.3390/ijms17101607)
Supplement: Supplementary file 1 [file ijms-17-01607-s001.zip › ijms-134229-Supplementary Materials/Table S7.xlsx]

## Sheet: qPCR data values for Figure 9
	Treatments	the relative expression values
gi|298552499	0h of PEG6000 treatment	1
	24h of PEG6000 treatment	1.2424
	72h of PEG6000 treatment	1.4245
gi|297735045	0h of PEG6000 treatment	1
	24h of PEG6000 treatment	1.08326
	72h of PEG6000 treatment	0.908795
gi|118481158	0h of PEG6000 treatment	1
	24h of PEG6000 treatment	0.809032
	72h of PEG6000 treatment	1.45301
gi|222845119	0h of PEG6000 treatment	1
	24h of PEG6000 treatment	1.18146
	72h of PEG6000 treatment	2.41496
gi|296523718	0h of PEG6000 treatment	1
	24h of PEG6000 treatment	0.658552
	72h of PEG6000 treatment	2.14078
gi|225450619	0h of PEG6000 treatment	1
	24h of PEG6000 treatment	2.0839
	72h of PEG6000 treatment	3.62072
gi|2641346	0h of PEG6000 treatment	1
	24h of PEG6000 treatment	1.67454
	72h of PEG6000 treatment	2.9643
gi|298552499	0h of PEG6000 treatment	1
	24h of PEG6000 treatment	0.28371
	72h of PEG6000 treatment	0.255824
gi|297735045	0h of PEG6000 treatment	1
	24h of PEG6000 treatment	0.144928
	72h of PEG6000 treatment	1.37734
gi|222845119	0h of PEG6000 treatment	1
	24h of PEG6000 treatment	0.241631
	72h of PEG6000 treatment	0.192235
gi|168035690	0h of PEG6000 treatment	1
	24h of PEG6000 treatment	0.424007
	72h of PEG6000 treatment	0.965555
gi|302142655	0h of PEG6000 treatment	1
	24h of PEG6000 treatment	0.269015
	72h of PEG6000 treatment	0.174961

## Sheet: qPCR data values for Figure 10
	Treatments	the relative expression values
gi|298552499	0h of PEG6000 treatment	1
	24h of PEG6000 treatment	1.2424
	72h of PEG6000 treatment	1.4245
gi|297735045	0h of PEG6000 treatment	1
	24h of PEG6000 treatment	1.08326
	72h of PEG6000 treatment	0.908795
gi|118481158	0h of PEG6000 treatment	1
	24h of PEG6000 treatment	0.809032
	72h of PEG6000 treatment	1.45301
gi|222845119	0h of PEG6000 treatment	1
	24h of PEG6000 treatment	1.18146
	72h of PEG6000 treatment	2.41496
gi|296523718	0h of PEG6000 treatment	1
	24h of PEG6000 treatment	0.658552
	72h of PEG6000 treatment	2.14078
gi|225450619	0h of PEG6000 treatment	1
	24h of PEG6000 treatment	2.0839
	72h of PEG6000 treatment	3.62072
gi|2641346	0h of PEG6000 treatment	1
	24h of PEG6000 treatment	1.67454
	72h of PEG6000 treatment	2.9643
